# Supplementary material for: Overexpression of GmCAMTA12 Enhanced Drought Tolerance in Arabidopsis and Soybean
Source: PubMed Central journal article supplement (PMC6801534; doi:10.3390/ijms20194849), 2019-09-29
Supplement: ijms-20-04849-s001.pdf [file ijms-20-04849-s001.pdf]

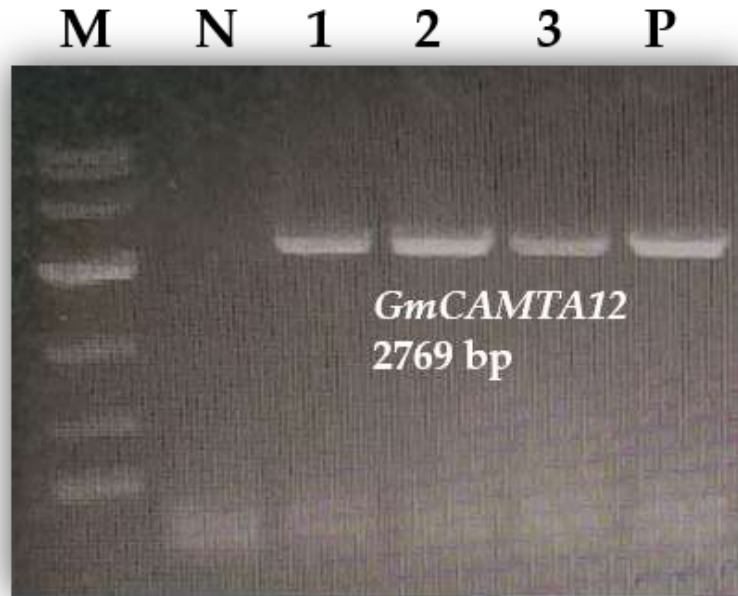

**Figure S1.** Gene-specific PCR of the EHA105 Transformants harboring OE construct. M = DL 10,000 bp (TaKara), N = NTC (No template/negative control), 1-3 = EHA105 samples, P- Positive control (OE recombinant plasmid).

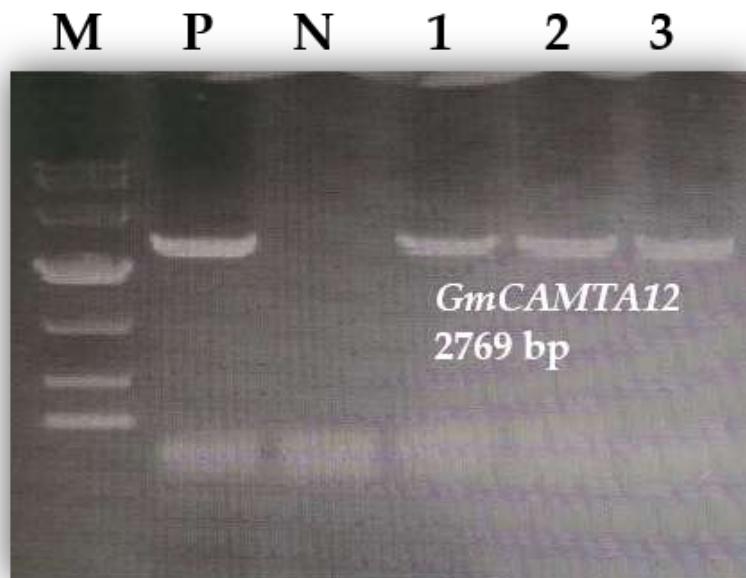

**Figure S2.** Gene-specific PCR of the K599 Transformants harboring OE construct. M = DL 10,000 bp (TaKara), P- Positive control (OE recombinant plasmid), N = NTC (No template/negative control), 1-3 = K599 samples.

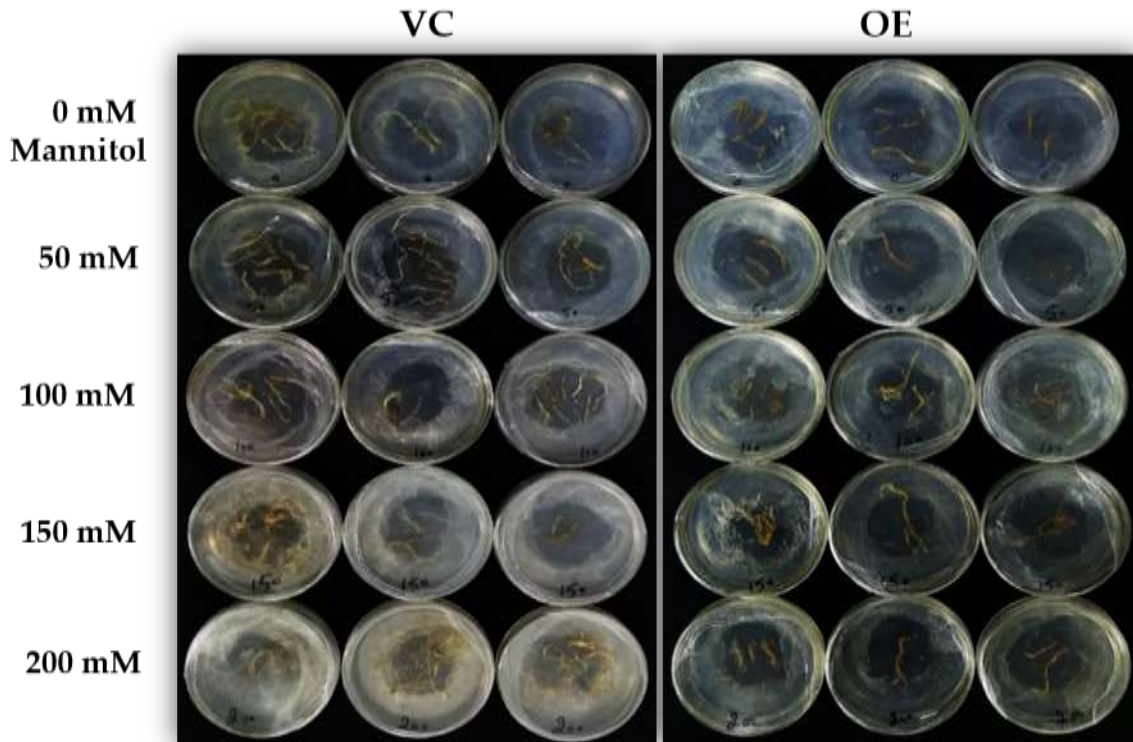

**Figure S3.** Hairy roots culture for fresh and dry weight. Comparison of growth efficiency (Fresh and Dry weight) of VC (Vector control) and OE (Overexpressing GmCAMTA12) hairy roots on MS with various mannitol concentrations.

#### Genomic sequences of Soybean CAMTA family

>Glyma.05G178200 (GmCAMTA1)

```

TTTTCTTCTCTTTGATAGTACAACACAACACAACAACAATGCTATCACAGACAAGTTCCCGCG
TTGAAACTTTTCTTTTTTCGTTCAATTGGTATTTGGTACATCTATCTCCCTCTAACACCCATTACAC
TCTCTCCGCGTTAAAAAACTATCTGAACTTTCTAGTTATTACAATTTATTACACAACCCATC
TCTTTTTTTGTTTCGTTAGATTAGAAACACAGACTTTTCCAAAGTGCTCGTTTACCTCAAACCT
CAGAAAAATAAACATCGAGTTATCACTTGTTTTCTTTGTCTGGGAGACAAAAACATTGATCAGTT
CAGTTTCTCACTTCCATGGCTGAGGCCAGACACTACGTCCCCCCTCTCAATTGGGTCAGCTTTC
TTCACTTTAATTCCTCTTTATGTTTCGTTTCTCATCTTCAAACCTTGAAAAAAGAAACCTTTTTTT
TAAAAGCAACCATGATAGTGAAGCATTGAAATGCCATCTCTTTATGTTTTAACATTTCCCTTCGACG
TATTTATTGTTGTTAACTTTGTTTTCAATTTCTATGCTTTGATGGACACAGATATTAAGCAAATTAT
TTTAGAAGCACAGCATCGATGGCTACGTCCGGCTGAAATCTGTGCAATTCTCAGTAATCACAAGA
AGTTTCTAATTGCTTCAGAACCTGCACATATGCCACCAAGTATGTTGTTTCTCTTCTGCCAAAAGA
TAACACTAGTTACCTTAAGTTCTCAATAGCTTCATTTGGAGAAAAGGATTTAAAATATTGTTTTTT
TCTTTTATTGAAGGGAGTGTAACGGGGAGGATTAGGATTTAATCTATTGAAAAATCTGTATCT
TATGAGGACTGAGACCTGCATGAAAACCTTGACACAATTATGCCCAATATCTAATTGCAAAATGGT
CATTCTCAGGGTTCTTAGTGAGTGTTCGTGAGTGGTTGAAAATTGATTTTGGTTAAGATTAATT
CTAAGCGAAGTGATTTATATTTGGATAATTTTATTCTAAAAGCAAGTTAACAAGAGAAGTCAAGTT
TATGATCTTTTATTCCATGCAAAAGTTACCTGAGGTTGATTTTACTCTTAATCAAAACTGGGCTGA
AAATCAATTTCTCAATGTGAGACCAAACATATGAGCATTACCTAAAATTACTTTAGCTGATATTT

```

CAAGGTGACTTTAGTTGATCCTTCCAAACATGCACTTACCATATTTTTCTTGACATTAGGTGGTTC  
ACTTTTCTTATTTGATCGGAAGGTGCTGAGATACTTCAGAAAGGATGGCCATAACTGGAGGAAGA  
AAAAAGATGGA AAAACAGTTAGAGAAGCTCACGAGAGACTAAAGGTAAATATGCTGCATGTAA  
GGTTATAAGTCTTAAGCACTGGTACAATCACATCTACCATAAAATGAGAAGCAAAGGTCTCTGTA  
AGCTTTATTTACTATCATTAATGTTAATTCTGCTTTGGGAAGTAAATGTATTGAGAGAATCTTTCT  
TCTTTATAAACTGTTGCATTGAATGATTCGTGATATGATGCTCTCAGGCTGGAAGCGTGGATGTGT  
TGCATTGCTACTATGCCCATGGAGAAGAAAATGAAAATTTTCGAAGACGCACATATTGGCTACTT  
GAAGAGTAAGTGTCTGTTAATATTTTTGCAGTTCGGTATAAAAAATCCCCTTTTTATTTAATGT  
TCTATCTTCATTTTCTGATTCTGCTGTCTTCTACCCCTCCTAACTTTCTTCCCTCATTCTCG  
GTCTCACAAACATAACAGTAATATCCAGAAAGGATTGAAGAAAACCTGTGCTCTTCTTCTAATGTG  
TTTGTCTTGCTTGAAGATGGTGTGCTTTAACTAGAACTAATGAGATATATCCTGTAAATGTTGA  
TCACATTCTATTGGTTTAACTGATTATAATAGACTTCTAGAAATTGCTAATTTGTTTCCATGGTTC  
TTATATGTGGAATGGGCTCCTCTTCTACCCCTTTTTATTCAACATTGCTGCAGGGAACCTCTCACA  
TTGTTCTCGTCCATTATCGACATGTGAAGGTAACATGTTCTGATTTTATTAGTATTTTTGCCTAATT  
GTTATTTGACAAAAGCTCAAGAAGAATTGCTTACTTTTACATTCCCAGTATAATTAAGAGAACAA  
TGAAGTAGTAACATGTAATTGTGTTGCAGAGTTATATGTGAAGTAGGAAAGTAAAACATGGAAA  
TTCCATCCTAACTTGAGTATGGTATTCCCAAATCATGTAACCTTGACTTTCCATGCTAATAATATA  
TACTGCCTAGAAATAACAAAGCTGGCACTGCTTCTTAATCAATACTTGGTCTGATAAGTTTCAA  
CACCAGACGATTTTCTGAATGCTAGATGCTATAAATTGGTGACATATTATTCTTTCTATGACTA  
TGCACAATTCTCTTTTCCCCTGTCTCAGATGTTGACTCTGTACTCTAATTCTTAAAAATAAAAAA  
GGCTAACATTCTCATCAGGAGTTTTGAACTATGTGATTAATATAATTGTGATCTGCTATATCTTC  
CCATCTATGAATAATTTCAATTTGGGCCCTTCATTCTTTCTCTCATTGTCTTGTCAAATAATCA  
GGGAACCAAGGCAAATTTTACATGTGCTAAAGAAAATGAAGAAACTCTTCTTATGCTCAACAA  
ACTGATAAAATTATGCCCAAACAGAGATGGAACTTCTTTATCATCTACTCTTCATCCACATAG  
TTACCAGGTTCCCTTCAAACTATGGATAGAAGCATGAACAGTCCCAAGCATCAGAATATGAA  
GAAGCAGAATCTGGTATTTCTTTTGTGCACATTAATAATTTAACTGTTCTGTTTTCAATTTTTCAT  
GTCTAGAGGACATTCTGAGTAACCTTTTTGTTGACTTTGTTCTTCAGTATCACTTTTTCTGTGTGTA  
TTTTAAATTTTTTAACTTGATGTAATTTTTACAGCATTCAACAACCATGCAAGTTCTGAGTTTTATT  
CTTTCTTGAGTTAGAACGCCCTGTTGAGAAGATTACACCTCAACCTGCTGATTCTTATTCTCTC  
GGCCACTCACAAGTAAATTTCTTCTTTTTAAATTGTTTGAAGTTAACTTTGATGCATTGCTACTGTA  
AATTTACACTATCACTCAGTCATACACTGTTGTACCATTCAAAGAGTATGACTTTTTGAGCTAAT  
TGTGAGAATCAAACCTTTTTAAACGATGTGACAGTGCATGATTGCAAGATACTGTAAAAAACTAA  
TAATGCATCAAATCAAATACCTTGTTTTATATCTTCCATTCATACTGGCCTTTTCATCAGGAAAG  
TCTGTACCTAACATGAACTGCATTATTGAATCTGGGACAGATGATCAAGAGAAGTCACCTGTCTAT  
TCCTGGGGTGAATTATATCTCACTCACTCAAGACAATAAAATCAAAGACATTCATAATTTTGGAT  
TGACATATGAATCCCCAAAACCCCTTGGCTTTTCTCATGGGAAGGTATCTTAAAAATAATGCT  
GGAAGTCAACATGTGCCTTTTAGCCTTTATTTCTGGAACACAGCCTGACAACATGGGAATCAA  
TAGCAAATTTTCCCAAGGACATGAGATAATGGTGCCATATTTGACCACCAGCATTGCTAAGCAGC  
ATGAGAATGGAAGTCTCATAACAAGCTGAAGGAAATTGGCAGGTATTGTGTACTAGTAAAAATCGG  
TACTTCAAATGCTAGTGGTACTCATTGTTGCAATATTTTATGGTATATAATAATTTTAGTTTCGAA  
ACAAATAGCCAGGCTCTGCAGTATGTTCTGTTGGAGCTTTGACAAGGTATTATATGATTATATCTT  
TATGTCAAAGTCAAAGACTTGAAAATAATGTCACTACAAAGTGATGTTGGTATGATGCTGCA  
AATATTTTTGACATCTTACTTGTTCGTGTTTCTGTAGAAAAAATATATATAAGCAATGGATTTTTC  
TTTATGTGTGACTATTTTTTAAACATGTTACATGTTTCTTAATTTTTATTTCTTCTTGAATTCATT  
TAATTGATTAAAGCTTATACTTGTTAACAGGCTTATGATGTTGATTCTTTACGCATGTCCAGTTGGC  
CTATAGATAGTGCTTATTCAGGCTCATCATGTGACATAACTTGCAGCAACCGTGAGCAGGAGGTT  
AATGATGTTGATTTGCAGAAATCCTTGGAACAGTGTCTTCTACATCCATACAAACAAAACAAGGT  
TTTCATGCAAATGATCCTCAGGAAAAACTTTTGAATGAAAAGAAAAGATAAAATCAGACCTA

GAGGCCAATAGAATCCTGGATGGAATAGAAGACACATATTTCACTTTTAAAAGGACTCTGTTAG  
ATGGATCTCCAGCAGAAGAGGGTCTGAAGAAGCTTGACAGTTTCAACCAATGGATGAGTAAAGA  
GCTTGCAGATGTGGAAGAGTCTAATAAACCATCCACTTCTGGTGGTTATTGGGATACAGTTGAAA  
GCGAAAATGAGGTTGGCAACACAACACTATTCCTTCACAAGGGCACCTGGACACCTATGTATTGGA  
TCCATCTGTTTCCCATGATCAGCTTTTTAGCATTATAGACTATCCCCAAGCTGGGCATTTGAAGG  
GTCAGAAATTAAGGTATTTTCTTTTGATATTCTGCATTTGCTATCAATTTTGATCATATGTTTCATTG  
AATTGTTGCTGTTGCTTTTTTTCTTATTTGTCAGTTATAGTCTGATTATTTATTTCTTCACTAATGAA  
AAAAATCGTACAGGTTATTATTTCTGGACGATTCTTAAGAAGTCAACATGAAGCAGAACAAGGT  
AAATGGTCATGCATGTTTGGCGAGGTAGAAGTGCCAGCAGAGATCATTGCAAAGGTGTTCTTTG  
TTGCATACTCCTCCACACAAGGCTGGGAGGGTACCTTTCTATGTAAGTTGTTCCAATAGGTTAGC  
ATGTAGTGAGGTGAGAGAATTTGATTTCCAAGTCAACTATACTCCAGAAGTTAACACTACAGGTG  
AGAATAGAGGCAGCACTTTTGATACTTTTAGTATCCGATTTGGAGAACTGTTGTCCCTGGGGCAT  
GCCTTTCCTCAGAATTCAGATTCAATTAGTGTAGTGAGAAATCTCAACTGAGAAGTAAAATCAA  
TTCTTTACTGAGGGAGGAGGAGGATGATTGGGACAAGCTACTGAAACTTACTCAAGAGGAAGAT  
TTTTCTCCAGAAAATTTACAGGAGCAGCTGCTTCAAATCTTCTGAAAGATAAGTTACATGCATG  
GCTCCTTCAGAAAATAACAGAAGAGGGGAAAGGCCCTAATATATTAGATGAGGGTGGCCAAGG  
TGTGCTTCATTTTGCATCTGCTCTTGGCTATGATTGGGCCCTAGAACCCACAATAGTTGCTGGTGT  
GAATGTGAACTTTCGGGATGTAATGGATGGACTGCTCTTCATTGGGCAGCATTTTGTGGCAGGT  
GAGTACCTCGGCACCTTGTGCATGAAACACATTTACCAGAATTGAATTTATATGCAACATCCTTG  
ACATTACATTAATAATAACGATGGGTCACTGATATTAATTGCAACTTTGCAAGAGTGATAGTAT  
GTGAGAAAAAATAGATTAGTGCTGAGAGAAAATATGTGAAATGTGCCTAAAAAGAAGTTAGAA  
TGTTCTTACTTGTGATACTCAATATACTTCATTATAGGTTTGCAGGATGGAACGCCATTGATGAA  
GAAACTATAAGAAAAAATCTACTGAAAAACCTATAGTATACTATGATTGGACGCACCTGAGTC  
TTTTGTGCATGAATGAAAACGTCTAGGATAAACTGACTAGAAAGAATCAATATATTGTTACTGCTT  
TGAGTTTCTTTTTCATTTTCTTGCTTACTTCATCTTTCATTAAGTTCTTGCATCTTACTTTATCAGGGA  
GCGCACAGTTGCTTTCCTCATCTCTCTCGGCGCAGCACCTGGAGCACTGACTGATCCATGTCCAG  
AACATCCTTCTGGTAGAACACCAGCTGACCTAGCTTCTGCAAATGGACACAAAGGAATTGCAGG  
GTATCTTGCTGAGTCTTACTAAGTGCACACCTCACAACCTCTCGATTTGAACAGGGACGCAGGAG  
AAAATTCGGAGCAAAAAGTAGTCCAAAGAGTCCAAAACATTGCTCAAGTTAATGATCTTGATGG  
TTTATCATATGAATTGTCATTGAAAGATTCAATTGGCTGCAGTGCGTAATGCCACCCACGCTGCAGC  
TCGTATTCATCAAGTTTTCAGAATGCAATCATTTCAGAGAAAACAACCTGAAGGAATATGATGATG  
ACAAACTTGGATTATCTGATGAACGTGCTCTTTCCTTGTAAAAATGAATATGAAATCACACAAG  
TCTGGACCACGTGATGAGCCTGTCCATGCTGCTGCAGTACGAATCCAAAACAAATTCCGCAGTTG  
GAAGGGAAGAAGAGAATTTTAATGATTTCGACAACGCATAGTAAAAATTCAGGTACATTTGTCT  
CTAACATGTGATATGTGCAAATGGCATTATTATTTGTGTCTATACCTTTCTAGGCCTTTTGACTAAG  
CATGTGTAGTATTTATTGTTTGTGTTGAATGTTAATCTTATTCTCCTTTTGGCTCCTTTTAATTGGA  
TCCAATTTATAACGTGCTATTTCCATGGTATAGGCTCACGTGAGAGGTCACCAGGTCAGGAAAA  
GCTGTGGGAAGATAATTTGGTCCGTTGGAATCTTGGAGAAGGTTATTTTACGTTGGCGTCGAAAA  
GGTAGTGGTTTTCGCTGGATTTAAACCGGAGGCCAATTCTGAGGGAACCTATGATACAAGATGTATC  
TTCAACAGATGATGACTATGATGTCTTAAAAGAAGGCAGGAAGCAAACAGAGCAAAGGTTGCA  
GAAAGCCCTAGCTAGGGTGAAGTCAATGGTTCAGTATCCAGAGGCAAGAGACCAATACCATAG  
GCTGTTGAATGTTGTAAGTGAAGTCAAGAAAATCAGGTATTTTACTTATTCGTGTATATTTTTAA  
AAAAGTTTCTCACTCGTACTGCTGAAAAAAGAAAAATAAAGTTTCTCAATTATCCTGCTTTAAAT  
CATTTTCTCTTTTAGACAGTATATAACAGCAGTAGTTTTCAATCTCTAAAAAGATTTGGCTCTTTTA  
AAGTTAATAAAGATAAAGTAATTTAGTTTGAATTTTAAAAATTAATGGTTAATATTATAACACA  
TGCATGATTTTATAATGCATGTGTATGTAATATATTGACTATTGATTTTTCCGTCACAATTCAAATT  
ACTTTTTTTTTAAATGAGTTAATTCAGAGGAGTTGAATTTCTGAAAAAGAGTGTAATAAATA  
CCTGAATATGGTTTTTCTCCCTTTAGTATTTTACATAAAGCTCAATTTGCTTCTAGTAAAGCCAAAG

AGCCTTAAATGGCACTGGCTTGATCCCCGGATTGAATCCCCTCATTTGTAACCAAAAAATAAGTT  
GCTTCTATCGAATGAAGCTGTTAGAGGTGTATATTGGATGGGCTACCTTAAAAAGCTTGTTAAGA  
AATTATATGTATATTTGTTTAAACTACCAGGATATATATAAAATTGACATCATGCATAGTATCTTC  
TTGTGACTGGCAGTAGAGCTTAGACTTCTGTATATTTCTTTTGCAGGTAAAGCATGAGAGCAGTTA  
TAACAATTCAGAAGAACCGAGAGAATTCGGTGACCTCAACGATCTTGAAGCATTGTTGGACGAA  
GATATTTTCATGCCTACAGCAACTTAGAAGTTAGCTTTCATTGTTCAATTGTATGACTTTGAATTTCA  
CAGCAGAGTTAGGTGATCAACTGTCTCACTTTGATTGTTATAGTAAATTAGCAATCTTAATTCTCA  
TTCTTTTGTATTAAAGGGGTGATTTGCTAACATGTCACACAAAAATTAATAAAAAAATGCATAACC  
ATT

>Glyma.08G135200 (GmCAMTA2)

TTTTCTTCTCTTTGATACAACAACAACAATGCTTTCACACACAAGTTCCCGCGTTGAAAACTTT  
TCTTTTTTCGTTTCATTGGTATTGGTATTTGGTATATTCATCTCCCTCTTAGCACCCCTTATTAGTATT  
ATTACTCTCTCTCCGCGTTAACAAAACATCTCTGAACTTTCCTAGTTATTACAATTTATTACAC  
AACCCATCTCTCTTTCTGGTTTCGCTTAGATTTAGAAACACAGACTTTTCCAAAGTGCTCGTTGTT  
TACCTCAAACCTCAAAGAAAAAACAACATTGAGTTATCACTTGTTTTCTTTTTTGGGAAGACA  
AAAACATTGAGTTCAGCTTCTCACTTCCATGGCTGAGGCCAGACTCTACGCTCCCCCTCTCAATT  
GGTTCAGCTTTTCTTCACTTTTAATCCTCTCTATATATCATTCTCATCATTTGACATCCGCAGAA  
TTCAAACCTGATTTTTTTTAAAGCAACCATGATAGTGAAGCATTGAATTGCCATCATATCTTTGT  
GTTTTAACATTTCCCTGTTACCTATTTATTGTTGTTGACTTTGTTTTGAATTTCTATGCTTTGATGGAC  
CCAGATATTAAGCAAATTATTTTAGAAGCACAGCATCGATGGCTACGTCCGGCTGAAATTTGTGC  
AATTCTCGGTAATTATAAGAAGTTTCGAATTGCTCCAGAACCTGCACATATGCCACCAAGTATGA  
TTTCTCTCCGCCAAAAGATAACACTAGTTATCTTAAGTTCTCAATAGCTTCATTTGGAGAAAATG  
ATTTAAAAAATTGTTTTTTTATTCTTTTATTGAATGGAGATGGGGAGGATTAGGATTTTAATCTAT  
TCGAAAAATCTGTATCTTGTGAGGACTGGGACCTGCATGAAAACCTGACACAATTATGCCCTATA  
TCTAATTGCAAATGGTCATTCTCGGGGCTTAGTGAGTGTTTTGGTGAGCGTTTGTAATAATTGA  
TTTTGGTTAAAATTAATTTTTTAAGTGAAAATGATTTATATTTGGATAATTTATTCTAAAAGCAA  
GTTAACAAAGAAAATCAGTTTATGATCTTTTATCCCAAGCAAAGTTACCTAAGGTTGATTTTACT  
CTTAATCAAATCTGCGCATCAATTTCTCAGTGTGAGACCAAACATGTGAGCATTTACCTAAAATT  
ACTTTAGCTGATATTTCAACGTGACTTTAGTTGATCCTTCCAAACACGCACTAACTATATTTTCTT  
TGACATTAGGTGGTTCACTTTTCTTATTTGATCGGAAGGTGCTGAGACACTTCAGAAAGGATGGC  
CATAACTGGAGGAAGAAAAAAGATGGAAAAACAGTGAGAGAAGCTCATGAGAGACTAAAGGT  
AACTATGCTGCATCTAAGGTTATAAGTCTTAAGCACTGTTACAATCACATCTAACTTGGCCATAA  
AATGAGAAGCAAAGGTGCTGTAAGCTTTATTTACCATCATTAAATGTTAATTCTGCTTTGGGAAGTA  
AAATGTATTGAGAGAATCTTTCTTCTTATAAACTGTTGCATTGAATGAGTCCTGATATGATGCTC  
ACAGGCTGGAAGTGTGGATGTGTTGCATTGCTACTATGCCCATGGAGAAGAAAATGAAAATTTT  
AAAGACGCACGTATTGGTTGCTTGAAGAGTAAGTGTTCGTTTAAATATTTTACAGTTTCAAGTATG  
AAAAATCCCCTTTTTATTTAATGTTCTATCTTCATTTGCCTGATTCTGCTCTATCTTTTTCTCTCACCT  
CCTCCTAACTTTCTGCCTCCCTCATTCTCGGTCTCACAACTTAAAGTAATATCCAGAAAGGAAT  
GAAGAAAACCTGGGCTCTTCTTCTTATGTGTTTTTTCTTGTGTTGAGGATGGTGTGCTTTAACTAGA  
ACTAATGAGATATATCCTGTAAATGTTGATCACACTCTATTGGTTTAAACTAATTATAATAACCTT  
CTAGAAATTGCTAATTTGTTTCTATGGTTCTTATCTGTGGAATAGGCTCCTCTTCTCACCTTTTTAT  
TCAACATTGTTGCAGGGAACCTCTCACATTGTTCTCGTCCATTATCGACAAGTGAAGGTAACAC  
ATGTTATGATTTTATTAGTATTTTTTGCCTAATTGTTATTAGACAAAAGCTCAAGAAGAATTGCTTA  
CTTTTACATTCCCAGTACAATTAAGAGAACAATGAACTAGTAACATGTAATTGTGTTGTAGAATT  
ATATATTTAGTAGGAAAGTTAACTTGGAAATTCCATCCTAACTTGAAGTATGGTATTCCCCCAA  
TCATGTAACCTAGACCTCCATGCTAATAATATACTGCCTAAAAATAACAAAACCTGGCACTGCT

TCCTTAATCAATACTTGGTCTGATAAGTTTCAAACCAGACGATTTTCTTGAATGATGCTATAAAT  
TGGTGACATATTATTCCTTTCTATGACTATGCAGTATGCACAATTCTCCTTCCCCCTTCTCAAATT  
TTGACTCTGTACTGTGATCCTTAAAAAATAAAAAAAGGATAACATTTTCATCAGGAGTGAACCTT  
TTTAACTATGTAATAAATAAATCGTGAGCTGCTATATCTTCCCATCTATGAATAATTCATTTGG  
GCCTTCATTCTTTCTCTCATCTGTCTTGTTCAAAATAATCAGGGAACCAAGGCGAATTTTACAAG  
TGCTAAAGAAAATGAAGAATCTTCCCTTATGCTCAACAACTGATAAAAATTATGCCCAAACA  
GAGATGGACACTTCTTATCATCTACTCTTCATCCACATAGTTACCAGGTTCCCTTCAAAAACCTGTC  
GATAACAAGCATGAACAGTGCCCAAACATCAGAATATGAAGAAGCTGAATCTGGTATTTCTTTTGT  
GCGCATTAAATAATTTAAAATGTTCTGTTTTCAATTTTTCATATCTAGAGGGCATTCTGAGTAGCCTT  
TTTGTGACTTTGTCTTCGATCACCTTCTGTGTGATTTAAATTTTTTAACTGTGTAATTTTACA  
GCATTCAATAACCATGCAAGTTCTGAGTTTTATTCTTTCCTCGAGTTACAACGCCCTGTTGAGAAG  
ATTCACCTCAACCTGCTGATTTTTATTCTCCTCGGCCACTCATAAGTAAATTTCTTCATTTTAAAT  
TGTTTTGAGTTTAACTTTGATGCATTGTCAGTTGTCACTGTAAATTTACATTACCACTCTGTCAT  
ACATTGTCGTATCATTAAATGAGTATGACTTTTTTGAACATAATTTAAGAATCAAACCTTTTTAAA  
TGTTGTGACAGTGCATGATTGCATGATAGTGTAAAAAACTTTACACTAATATTGCATCAAAAATC  
AAATACCTTGTTATATATCTTCCATACATACTGGCCTTAATCAGGAAAGTCTGTACCTAACATGAA  
TCATATTATTGAACTGGGACAGATGATCAAGAGAAGTTACCTATTATTCCTGGGGTGAATTATA  
TCTCACTCACTCAAGACAATAAAAAACAAGACATTCTTAATGCTGGATTGACATATGAATCCCCA  
AAACCCCTTGCTTTTCTCATGGGAAGGTATCTTAGAAAATAATGCTGGAAGTCAACATGTGCA  
TTTTCAGCCTTTATTTCTGGAACACAGCCTGATAACATGGGAATCAATAGCAATTTTTCTCAAGG  
AGAAGAGATAATGGTGCCATATTTGACCACCAGCATTGCTAAGCAGCATGAGAATGGAAGTATC  
ATTAAGCTGAAGGAAATTGGCAGGTATTGTGTAAGTAAATCAGTACTTCATCTGTTAGTGG  
TACTTATGTTATATAAGAATATTTAGTTCTAAACAAATATCCAGGCTCTGCAGTATGTTCTGTAGG  
AGCTTTGACAAGGTATAATATCTTTATGTCAAAAGTCAAAAACCTGAAAATAATGTCACTAAAAA  
GTGTTGTTGGTATGATGCTGCAAATATTTTGACATCTTAATGACTTGTTCGTGTTTCTGCAAACA  
TATAATCAAGCAATGGATTTTGCTTTATGGTTGACTGTTTTGTAAACATGTTACATGTTTCTTCT  
TCAAACCTCATTTAATTGATTAAAGCTTAATCATCCTTGTTAACAGGTTTATGATGTTGATTCTTTAC  
GCATGTCCAGTTGGCCTATAGATAGTGCTTATTCAGGCTCAACATGTGAGGTAAGTTGTAGCAAC  
TGTGAGCAGGAAGTTAATGATGTTGATTTTTCAGAAATCCTTGGAACAGTGTCTTCTACATTCACAC  
AAACAAAACAAGGTTCTCATGCAAAATGATCTTCAAGAAAAACTTTTGAATGAAAAAGAAAAG  
ATAAAATCAAATCTAGAGGCCTATGGAATAGAAGACACATATTTATCTTTTAAAAGGACTCTGTT  
AGATGGACCTCCAGCTGAAGAGGGTCTGAAGAAGCTTGACAGTTTCAACCAATGGATGAGTAAA  
GAGCTTGAGATGTGGAAGAATCAAATAAACCATCCACTTCTGGTGGTTATTGGGATACAGTTGA  
AACTGAAAATGAGGTTGGCAACACAATACTTCTTCCCAAGGGCACCTGGACACCTATGTATTGG  
ATCCATCTGTTTCCCATGATCAGCTTTTTAGCATTATTGACTATCCCCAAGCTGGGCATTTGAAG  
GGTCAGAAATTAAGGTATTTTCTTTTGATATTCTGCACTTGCCATCAGTTTTGATCACATGTTTATT  
GAATTGTTGATGTTGCTTTTCTGCTTATTTGTGAGTTATATTTCTGATTATTTATTTCTTCATTTATGAA  
AAAAAATGTATAGGTTATCATTTCTGGAGAATTCCTAAGAAGTCAACATGAAGCAGAACAATG  
TAAGTGGTCATGCATGTTTGGTGAAGTAGAAGTGCCAGCAGTATCATTGCAAAAGGTGTTCTTT  
GTTGTCATACACCTCCACACAAGGCTGGGAGGGTACCTTTCTATGTAACCTGTTCCAATAGGTTAG  
CATGTAGTGAAGTGAGAGAATTTGATTTCCAAGTCCACTATACTCCAGAAGACACTACAGGTGA  
GAATAGAGGAAGCACTTTTGATACTTTTAGTATCCGATTTGGAGAACTTTTGTCCCTGGGGCATGC  
CTTTCCTCAGAATTCAGATTCAATTAGTGTAAGTGAGAAATCTCAACTGAGAAGTAAAATCAATT  
CTTTATTGAGGGAGGATGATGATGATTGGGACAAGCTACTAAAACCTTACTCAAGAGAAAGATTTT  
TCTCCAGAAAATTTACGGGAGCAGCTGCTTCAAATCTTCTGAAAGATAAGTTACATGCATGGCT  
CCTTCAGAAAATAACTGAAGAAGGGAAAGGCCCTAATGTATTAGATGAGGGTGGCCAAGGTGTG  
CTTCATTTTGCAGCTGCTCTTGGCTATGATTGGGCCCTAGAACCCACAATAGTTGCTGGTGTGAAT  
GTGAACCTTCGTGATGTAATGGATGGACTTCTTTCATTGGGCAGCATTGTGTGGCAGGTGAGTA

CCTCAGTACTTGTGCATGAAACACATTTTCATCAGAATTGGATTTATATGTAACATCCTTGACATTA  
CATTAACTTAATAGGATGGGTCAGTATTAATTGCAATTTTGCAAGAGCGTTAGTATGTGAGG  
AAAAATAGATTACTGCCGAGAGAAAATATGTGAAATGTGCCTAAAAGAAGTTAAAATGCTCTTG  
TTGATACTTGATATACTTCATTATATGTTTGAAGGATGGAATGCGATTGATGAAGAAATTATAAG  
AAAAATCTACTGAAAAACCTATAGTATACTATGATGGGATGCACCTGAGTCTTTTGTATGAA  
TGAGTTTCTTTTTTCATTTTCTTGCACTCTTGTCATCTTTCATTAAGTTCTTGCATCTTACTTTATC  
AGGGAGCGCACAGTTGCTTTCCTCATCTCTCTCGGCGCAGCACCCGGAGCACTGACTGATCCATG  
TCCAGAACATCCTTCTGGTAGAACACCAGCTGACCTAGCTTCTGCAAATGGACACAAAGGAATT  
GCAGGGTATCTTGCTGAGTCTTCACTAAGTGCACACCTCACAACCTCTCGATTTGAACAGGGACGC  
GGGAGAAAATCCGGAGCAAAAGTAGTCCAAAAGACTCCAAAACATTGCTCAAGTTAATGATCTT  
GATGGTTTATCATATGAACTGTCATTGAAAGATTCACTGGCTGCAGTGTGTAACGCCACCCAAGC  
CGCAGCTCGTATTCATCAAGTTTTTCAGAATGCAATCATTTCAGAGAAAACAACCTGAAGGAATATG  
ATGATGACAACTTGGATTATCTGATGAGCGTGCTCTTTCACTCATAAAAATGAATGTAAAATCA  
CACAAGTCTGGACCACGTGACGAGCCTGTCCATGCTGCTGCAATACGAATCCAAAACAAAATCC  
GCAGTTGGAAGGGAAGAAGAGAATTTTTAATGATTCGACAACGCATAGTAAAATTCAGGTACA  
TTTGTCTCTAACATGTGATATGTGCAAATGGCAATATTATTTGCGTCTATACCTTTCTAGGCCTTTT  
GGCTAAGAGCATGTGTAGTATTTATTGTTTGTGTTGAATGTTTAACTTATTCTCTTTTGGCTCCTT  
TTAATTGGATCCAATTTATAACGTGTCAATTTCCATGGTATAGGCTCACGTGAGAGGTCACCAGG  
TCAGGAAAAGCTGTGGGAAGATAATTTGGTCCGTTGGAATCTTGGAGAAGGTTATTTTACGTTGG  
CGTCGAAAAGGTAGTGGCTTGGCTGGATTTAAACCGGAGGCCAATTCTGAGGGAACCTATGATAC  
AAGATGTATCTTCAACAGATGATGACTATGATGTCTTAAAAGAAGGCAGGAAGCAAACAGAGCA  
AAGGTTGCAGAAAGCCCTAGCTAGGGTGAAGTCAATGGTTCAGTATCCAGAGGCAAGAGACCA  
ATACCATAGGCTGTTGAATGTTGTAACCTGAGATCCAAGAAAATCAGGTATTTTACCTATTTGTGTA  
TATTTAAAAAATAAATTTCTCACTCGTATCACAGAAAAAAGAAAAAAGCTTCTCAATTATC  
CTGCTTTAAATCATTTTCTTCTAGACAGTATATAACAGCAGTAGTTTTTCATTCTGGAAAAAGAT  
TTGGCTCTTTTAAAGTTAATAAAGATAAAGTAATTTCAAGTTTGCATTTTGAAAATTAATGGTTAAT  
AATATAACACATTCATGATTTTATGATGCTTGTGTATGTAATATATTGACTATTGATTTTCCCGTCA  
CAACTCAAATTAATTTTATTTTTTAAATGAGTTACTTCAGAGGAGTTGAATTCTCTAAAAAA  
GAGTGTAAAAAAACAACCTGAATATGGTTTTTCTCCCTTTAGTAATTTTCATAAAGCTCAATTTGC  
TTCTATTAAGCCAAAGAGCCTTAAATGGCACTGGCTTGATCCCCGGAGTGAATCCCCTCATTG  
TAACCAAAAAATAAGTTGCTTCTATCGAATGAAGCTGTTAGAGGTGTATATTGGATGGGCTACCT  
TAAAAGCTTGTAAAGAAATTATATGTATATTTGTTTAACTACCAGGATATATATATATATATAT  
ATATATATAATTGACATCATGCATAGTATCTTCTCGTGACTGGCAGTAGAGCTTAGACTTCTGTAT  
ATGTCTTTTGCAGGTAAAGCATGAGAGCAGTTCTAACAAATTCAGAAGAACCGAGAGAATTCGGT  
GACCTCAATGATCTTGAAGCATTGTTGGACGAAGATATTTTCATGCCTACAGCAACTTAAAATTT  
CATTGTTAAGGGGTGATTTAGAATTTACAGCTGAGTTAGGTGATCAACTGTCTCACTTTGATTGT  
TATAGTAAATTAGTAATCTTAATTTCTCATTCTTTTGTGTTAAGGGGTGATTTGCTAACATGTCACA  
CAAGAATTAAAAAAATAATGCATAACCATTAAAACCATTCTTACAATGCAAAAATAAACATGTCA

>Glyma15G053600 (GmCAMTA3)

AATTGATAATACTAGTAGTAAAAGTTACTCTGCTGTATAGTATAAATACTAAATATACAGTATCA  
GTTTTTCACTTTATCGCGCGTCAGTTGAGAAAAGGAAAAGAAAGGATAAAAAGAAAAGAAAA  
AAAGTCTCTGTCGTCTCTCTCGTCCTTCTGTCGTTGCGGTTGATCTCAGATTCAGTCTTCGCCATGGC  
GGAGGGTGCTTCTTACGGATTGCGTCGTCCATTAGGTCATTTTCTAATTGCTTTTTTCTTCTTTTTT  
TTTGCTTCATAATTTTTTCAATCAATGCTTCGATCCTGTGAGTTTAAATTGTTATTTTTCGACACGATTT  
TTGTCACGGAGCTTCAGCTATTGAATTTCTGTTTCTATCGTTGAGTGGGTTCCCTGTTGTTGGGACTAA  
GGTTCAGTTACTAATAATGGCTTCGCTAATGAATGGACCCAAGCTTCGGTCCCTTACTGAGGTTGA

CAAAAAGTGTGCTCAATTGATTTGGGGAATTAAGTATTTTGGGATTTTTTTTCAGTCCAATTAGGCG  
TTATAGGTGTTAAAACGTCCTTTGGCACTAGGTTTGAACGACATTAAGTATTTGATAGTACTGCTTCA  
CTGCATCAATTTTCCACTTGTTTCGGGTTCTGACTGGTGAACATAACTAATATGCAGACCCAATCCC  
CCTCTCCCCCAAAAATGAGCGAACCTAGTATTGTCAAATTTGTAAGTATTTCAAAAATGATTTAGTT  
GGATGTAGAAAAGCACCATGCATTTGAGGGATTTTCCTTGCAGAGAAAAACTGAAAGAAGCATCA  
ATTTTTAGAAAAGTTAGATTTATTCATGGAGACAAAATTAAGGACTATCATTGTCCATTTTTTTATG  
AATCCTGTTCTTATTGGTGCAAAATGTAAAAGAAAAAAGTTGGATTGAGACTAGTGGTATTGGT  
AAGGTCTGACATGAATATATGTTGAGCCCTGGCTTCATATGGTAAGGCGGCTGTTTTAACTGTTCT  
TGCTCCTCTTATGGTGTGTGAAGAAGTTTGAATAACACCGGGGAAAGCAAAAAGTGAATTTGAG  
TGAAGGATACATTGCTTCAAAAATATAACATACACAATGGCCTTGTGCGCAAATTAATTCTATCAA  
TTCATAGTGGCCATATAATGCTGGGTTCTTCTTCTTCTTGCCTTCTGATGTGCCTTGCCTTACCT  
CTGTGTTGATTACAAGCATATTCTTCTGCGGTTCTGCCTCTCTCATTCTCTGTATACTAATACCATT  
AATATAGTTATCAACAATCCCTAAAATTGTAGTCACTGTGCAGTATTTATTTAACTCATAATAAC  
AGGGTATTTATAGATCACCCCTTATGAACATAAGGAAAGTTACCCATATAAATCTATGAATATTTA  
TTTTCAGTTAAAGTTTGTGTTCAAAGTTATCATATACAAGATATTTTCTTATACATCATTTCATCA  
CATGTATATCTTCATATATAATTTTGCCTCTTTTGGTAGGATCTTTTCGATTTATGATATTTTATCCCC  
CTCCCGATCTCGTGTGAGATCTCGATTCTGACAACGTTGGTCAAAAACAATTTTTGGACAAAAGC  
TCCACAACATTTTGTATTTTAACTATTTTAAACACAAGCTTTTCCAAATAATCACATAAAAAGACT  
AAAACCGAACTGATTCTGACGAAAGGAATATATTTGGTAGATAGATTGATTTTTGGGGGGACTAA  
CAGGCTGCTTAATTTATGTACTGGATACTTTGACCTCAATATTGGACTCATGATTGACAATGTGGG  
TGTTCTTTTCATATGCCAGTTTATCTTTCTTTTTGATTCTGTAAACAAAATATTCTTATTGAAGCAT  
GTCATTTTTGTGGCCATGATTTGATTCTTTAAGCTTGGCTTGAATAATTGTATTTGTGTATGTGATATT  
ATTCAAAAATCAAATATTTAACTGAATGCCTTATATCAATGTGCAGATATTCAGCAATTACAATTT  
GAAGCCCAGCATCGATGGTTGCGACCTGCAGAAATTTGTGAAATTTCTTCGTAATTATCGGATGTT  
TCATATCACATCAGAACCTCATAACAGGCCACCAAGTATGGTACTGCCTGTTACTGATAAATTA  
ATTGGCACCTGTATATACTATTATATAATTTTTTACATATAATCCATTGGATGGATTGCTTAAAGAAG  
CTTACACCAATACTGATTTTCAATGATGTGTTTGTGCAACTGGGTGTTAATGAACTTTCTGGCCG  
AAATTATTAACATCTGTCTATGTGCCGAACAATGTGTTTCAACATGGAAGTATTGCCCTCCTGGG  
TTCATTTAGCTGCATTTAATTCCTTTTAAAGATGTATCAAGCATTTTAAATTTGCTTTATCTGAACTT  
AAGTTATTCATGTTCCAATAGATCCTATATATTCATTTCAAGGAATAGAGGCACATTGGGTAATTC  
AGTAAATATTTTTTCATGAAATTTGGTAGCAAAAAGCCCTGATATGCTTATTGAATTATCTTCG  
CAATTCAGTAGTTTTTATGATATTATTAGTAGTATTTTGTGTTTTGCTAAAATCTTGTTTCGTTGTT  
AACTTCAATCCATCTTTTAGCTCCTAATCCTATTCCATCATTACTTCATGCTTACTAAGACATCAC  
TTAATGACTTGTATTTTATGATTTTCAAGGTGGTTCACTTTTTCTTTTTGATCGAAAGTTTTGAGATA  
CTTTAGAAAAGGATGGGCATAATTTGGAGAAAAGAAAAAGATGGAAAAACTGTGAAAGAAGCTCA  
TGAAAAGTTGAAGGTAAGCTTATAATTTACTTCAGTTTTGAGTTTGTAGTTAATCAAATTTTCGTA  
AGACTAGCGTATACATAGGATGATTGGAATTTTCTCCAATTGGAAAGCAAGTCTTTATACCATTA  
TGCAATTATTCAGTGGAGTTGTAACATCATTTAAGTAAATTTAGGTTGGAAGTGTGATGTGTTGC  
ACTGCTACTATGCCCATGGAGAAGAAAATGAAAATTTTCAAAGGCGAAGCTACTGGATGCTTGA  
ACCGTGAGTATGAATTAATTTACTTACAAGACTTTGTGTATTGGAATTTAAAGTACATTCATATTT  
CATGTGTTTGTGCTTTGTAAGTTTCTTAGCAAGTACTGCATTGGTGCATTTGCTGTCATATCTCAT  
GTCAATGTATAGATATAAGTTTTTAAAGGGTGTTCCTTATCCTCAAAGTATAGTGAATAGAGTGTTA  
GAGCTACATTTTTGGCTTTTCTTTGGTGTGTTGTATGCTTCAAAGGAGTTGCTAGCTTAGACATGTTG  
ATTGAGAAGCTTTACTGCATTTCTTCTCCCTGTTCTTTTTTATCTAATAAATTGTAGATAACAGTTTT  
TAATCTTACCGGTTGCAACTATTTTGTGCATCTTACCTAATTTGAGTTTTCAATGTTTCATCTACT  
TAAATATTTTTTGTCTTACAATTAATCAGAATATGGTTTTCTTGTATTTTTCTTTTATGTCAGGGAT  
ATGATGCACATAGTATTTGTCCATTACTTGGAAAGTTAAGGTATTTTGTCTATTTCTTCATATTTTTTC  
TGTTATTATCTTTCTTGTAGTTGTTATTACCAATGGTTATGTATTTTTTATCAATTATAAGTTATAA



CTCGCATTCTAGCTTTTGAACCTTATCTATTTTTACTTGAAACGTTTTACCTCCATAACTTGAGTT  
TTGATGTTTTACAAAATATGATGATACATTTGAAGGGAGAAAGAATGAAACAACCTGCAGTTCTTG  
TAGGCTATGTTGAGCCATCATGAATTATTAGTGATATCATTGCAACTCATTTTGGGTCTTTATATTA  
TTTAATAACCATGGCTGTAATTAATGAAGTATACACAGGATGAGTTTTTCATAATGCGTCTTGAGT  
AGGAAACAGCCACTAAGCCATTTTTAGATATGATTTGTATGGCATCTAGATTGAGTTCAATTTGAT  
CAATTGTCAATGTGATTTTTTTAATACTATCAGTATTACCTAATGACATGTTAACATGTCATTA  
AGAGTTTGAGTTCCTAGTTGTTGTGATAGTCAAACATGGGCCAATGGGTCATATTGCACATCAG  
CAGCATAAGCCCATGGATTAGAGAGAATATGTCAGGAAAATAAGTAGAGTCAGGGTAAGAAT  
GATGAGGTGGCAGAGAGAGAAAGGGGTGAGCAAATTGTGTGAGTGTCTGTATATGGGGATT  
GTGTAGGGCGAGTGTATGATGAGAGAATCATTTTCAGTTAGTGGCAGAGAAATTTCTATTCTCTA  
GGGAGCTGAGCTCTGTTGGCTGTAGGGATATTCATTCTCTGCATTTTCCTTCTATATCAGAAATA  
AAACATTGTTTTTCATTATTGATTCATTTCCATGTCATTTGTTATTCTGTGATTTTGGCTGCATAA  
AAAATATGCCTTTTTAGCATTGATAAACCAGTGTGGCTAAGCTTAAGCATTATACCCATTGAAAA  
TGTTGAATTGTATTATTGCTCTCAGCTGGTATACTATTTTTTCTGATCCCATTTCAATAAAGT  
CTCAATTGATGATATAAAGATAATGATATGCTCAAATGGGCATGATAGTACATGTTCCGGTTTGT  
GGGTTGGGTTCAACCTAGGTGCTCATGCCCTAATGGCTTAAATAAGTAAGGGCTTGTGCCTAATA  
TACGGTGTATGTGTCAAAGTTGTGTTTCTACCAACAGCTTAAGCTTTTGGCATGGTGGTCATAT  
CTCTGGTATTAGAGTTGGTCTGGGTTCAAATCTCAGGTTTGAATGTTTCAAATCATCTCAAGG  
TTTGAGGACTAACCTTTTCTAAGAGGGAGGAAATGATATGCCCAAAGAGTCATGAGGTATATATT  
GAGTTTGTGGGTTGGATTCAAGCCGGTGGCTGTGTCCAATGACTAAAACAGGAAAGTGCTTGTG  
CTTGATGCAGTTTTATGAGTCAAGACTCAAGAGTTGCACATCTGCCAACATCTTAAGCTTTTGGCA  
TGTTGATAAAAGCACTCTTGGTCATATCATACAATCCTTTTTTAAATATCTTGAAATCTATTTTAA  
TCATATTCTTCTTGGGATCAAGCATAAAGAATTTGAAGCTGTTCAATGTGGAAGAATCTGTGTTTT  
GTAGTTCTGGTCTTGATTGACTTGAGTGCATGGGTGACTTCTTATTCATAGATTTCTTCTGGTTTTT  
ATTTCTCAGGGTAAACAAAATATTGTTGTAAATAATGAAGGTGATGAAGTCCCAACAGATTCCCA  
AAAGGTAACCTTCTCCATCGTCTAGCCTTCCCACACATCATAGCTGTGTTTCTTCACTGAGTACAGA  
TTCCGTGAGCCCAACAACCAGTTTGATGTCTTACATGAAGATGCTGATTCTGGTAATTTCTGCTTA  
AATTTATTTATGAGGGTTCAAAAATTTGTGGCCTGTGAAGTGAATTAATATGCCAAGAGCCTGTT  
TGGATAAATTTCTCCGTAAACACTTTTAGGAGAAGGAAAAATGAAACAAGTTTTTCCATAAGCTT  
AAATTAACCTTATGTATAAATTTTGGTAGAAGCTTTCTCATTTTAAAGCTTATGGAGAAACAACT  
TATTTCATTTTCTTTTTATTGCTTCTACTATAAGTGTTTATGGAGAAGTTTATTGGAACATGCCCC  
AAGTCTTTAACTATCTTGGGGTACTGTTACAACAAATATTTGTGTAATAGTTTGGCCATTTGATC  
ACCCTTAAATGATTTAATCATAATTCTTTCCAGAGGATATCCACCATGCAAGTTCTGGGTTGCACC  
CATTACATGAGTCACAACATAGTGGGAATAGTCCATTGACGGAAAAGATTGGTGTGTTTCGAA  
CAGTTCATATCTTATGCATCCCTTTTCAGGTTACCTTCCCTCCTTTTTCTTCATTTTTGTTGTCTCACA  
TGTATATTATAACTTCTATTAGGCAACCTCTGACATGTGTTTCCCCATATATATATCTTAAATAT  
TTTTAGGTGATAATGAACAGTCATCAATTTCTGGAACGGATTATGTCCCTGTTGTTTCATGGGGATA  
AATTTAGAGGAAATGATACTGCTTATACTGATGGTCAGAAACCGCATGGCATGGCACCATGGGG  
CACTGTCTTGCAAAGCACTGCCAAATTGCACAATGATCCTTCTCTTGCATCATTTCCCTCCATCCT  
ACCTAGTTCAATGGGAGACGTCCTTGAACAAGAACATAACCATTTTTGGTGACCTTTTAAATGAGCA  
AAAGTGGTCTCACTGAGGAAGCAGAGAGTTCTCAGTCTCTCCAATCAAATTGGCAGGTACATACT  
GTTACTGCATAGTATATCTATCAGTAGTATTATCTCACATCTATGGCTATTATTTTTGGGATGGAA  
AAGACATAATTTGACAGTTTTATGGGACTAAAGCCTGTGCCAGAGCCACTTGACCTGCAATTTTTT  
ATTAATCTTTTTAGTTAACTTAATGATGAATATATTAATCTAGTAATGGGCTGCATTTGTTAT  
ATAAAAAGTTTTGAATTGTTTCTGAACTCTAGAAATGCTTTTGTGGGAAAAACCCAAGTCT  
GCATTGACTAGAGATAGTCCAAGATAGGGTACATAAGTGGGGAATAACCCTCACCTTATAAGC  
TGTTTTGTAGGGCTGAGTTAGGATCCAAACCCAAATTCTAAGAGCCATAATTTCAAGATTACAGTTT  
TTTTAGTAACTTGAACCTTCTCCAGATGTATCCATATCCAATCTTTTTGTTGAGATAAATATTTTTT

AGCTTGAACCTCTTCGTAATAAAGTGTGGGTAACCATGACTGGGTGTTGGTTTTTCATAATATAT  
CTTAATCTGTTGTCTTTAAAAAAAATGACTGGGTGTTGCCTTGGTGTCAATTGTATCTTTTGATTG  
CTTAATTTGAAACTGATAGTTTTAACTTTGGTTTCTCTTGTATGTAATTTCAAACACTACTACTGCTTA  
TGAGATTTGGCTGAAAACATAACTATATTCATTTTGTATTTAATTTGATGCAGATTCCTTTTGAA  
GACAATTCAGGAGGCATGCCAATGTTAACCCAAACCCAATCATTGGTCTGCAATTTAGATCTGA  
TTATGGCACCGGTTACTAGGGAACGAAACTCGTAATGCAAGTTCTGAAATTGCTCCGATCCTGT  
ACAGTTTTCATGGTGAACCAAAGAGCAGCCTATGCAGCAAACACTATCCACAAGAGCTTGAAGA  
TGGACAATCTCAACATGCACTAAAATCCAATTCTGCAAATAAAGTTCTGATGAAGAACTATC  
AACTATGGCTTAACAGTGAAGAGCACATTATTGGACAGAGACGAGAGCCTGAAGAAGTTGATA  
GCTTCTCTCGGTGGATTACTAAGGAACTTGGAGAGGTGGCTGATTTGAATATGCAGTCCTCACCT  
GGTATTTTCATGGAGTACAGATGAATGCCAGCATGTGATAGATGATACCTCATTGAGCCCATCTCT  
CTCTCAAGACCAACTGTTTAGTATAAATGATTTTTACCTAAATGGGCTTATGCTGAGTCTGAAAT  
TGAGGTAAGTATCTTGTGGAAAATCTATTTTATTATTATTATTATTATTATGAAGAAGAATCA  
GATGTAGTTTGATTGACATGCTATCCTGTTCAAAACTATACAGGTGTTGATTATTGGATCATTTTTG  
AAGAGTCAACCAGAGGTGACAACCTGTAACCTGGTCCTGTATGTTTGGGGAAGTTGAGGTTCTCTGC  
TGAGGTCTTAGCTGATGGAATTTTGTGCTGTCAAGCTCCTTGTGATAAGGTTGGACGGGTCCCTTT  
CTATGTAACATGTTCCAATAGGTTAGCTTGTAGTGAAGTGCGGGAATTCGATTCAGAGAGGGCT  
TTGCTAGAAATGTAGATTTTGCAGATTTTTATATCAGTTCAACTGAAATGCTGCGTCATTTGAGAC  
TGGAGGATTTTCTTTCTTTAAAGCCAGTGGACCCTTCAAATCATTCTTTTGAGGGTGATATGGAGA  
AAAGAACTTAATTTTTAAGCTCATTCACTGAGAGAGGAGGAGGACTATTCAATTAAGGATGA  
AGTTACTAGAGAATTGGATATATCCCAACACATGGTGAAGGAGCATCTGTTTCACAGGCAGTTTA  
AAGAGAAGCTGTACTCATGGCTTCTCACAAAGTAACTGAGAATGGTAAAGGGCCAAATGTATT  
AGATGAGGATGGGCAAGGTGTTCTACATTTAGCAGCTTTTCTGGTTATGATTGGGCCATAAATCC  
AATTATATCTGCTGGAGTTAATATCAACTTCCGAGATGTGAATGGATGGACAGCTCTTCATTGGG  
CTGCATCCTGTGGCAGGTAAGGTTCTTGAGATTTTTTTTTCTCTTTATTGAGTACAGTTGGTTGA  
ACATAAGTTACGCTTCTAATCTGGTTGAACCTTCTTTACCTCCCTGATAATTCTTAATTTTTTTTC  
CACTTTTATCAAGTGAATTTGTTTACAAAATTGGTTTGTCTTAGCATATGAAGCAAATTTAAGTTTT  
CTTTAAAGGGTGGTAAGAAATCTCCAGTGTTTTGCATGAATGGACTTGTCCACACTTCCACCCCC  
TCCCTCCTTGGTGCTAAACGTTAATACAGTTTTTATTATGTGTTTAAAATAGTAAATTAGCTAACT  
TAGAGTTATCCCTAGAGCAATTGCTTTGCTTAGTCAAAGGCAAATCACAGTCTGCTTGCAGCATT  
GACTTTCTCAAATATATTATGTTTCAGCATAACATAATTTTTTCACTTATGTTATTCTTTCTCCTTTT  
CTCAGAGAGCGGACAGTTGCTGTCCTTGTCTCCATGGGTGCAGATTGTGGAGCACTGACAGATCC  
ATCTCCCGCATTTCCATCTGGTAGAACAGCTGCAGATCTTGCTCTAGCTATGGGCACAAAGGAA  
TTTTCTGGTTTTCTTGCTGAGTCTTCAATTAACCTCACCACTCGAAACCCTCACAATGGATGATCAA  
AAGGTGGTCAGCAAGAAATTCAGGAATGAAGGTGGTGCAGACAGTTTCAGAACGATCTGCAAC  
ACCTGTGCACTATTGTGATATCCAGATGCCATCTGCCTCAAGGATCACTTACTGCTGTGCGTAA  
TGCAACACAAGCTGCTGATCGTATACATCAAGTATACAGAATGCAGTCATTTAGAGGAAGCAG  
TTAACTCAGTATGAAGGTGATGATGAGCTTGGATTGTCAGATCAGCAAGCTCTTTCTCTGCTAGCT  
TCCAGGGCATGCAAATCTGGACAAGGGGATGGTTTAGCCAATGCTGCTGCAGTACAGATACAGA  
AAAAGTTTCGTGGTTGGAAGAAGAGAAAAGAATTCTTGATGATTTCGTCAAAGAGTTGTTAAAAT  
CCAGGTACGTTGATCTGTTCTTTTACTTGATTTTTTCAATTTCAATATTCTGGACTTTCTTTTAAAGT  
AAACCTGTATATTGTTAGATGGTCTTAATTTATCATCCAATCATCTTATGAATTATTCTGCTATTTT  
GGAAATTAAGGTGGAAAATTGATTGCATTGGAGATTTTATTGATAAAAACCTCTGGATGTGGAT  
AGAATGGAAAAATGCTTCTTAACTTTTTCATCTCTTTGCTCCTTCTATAACTACTGTATACATGT  
GGATCACACATTGGGATTGTCAAAAACCTGTAGAAAACCATCCAGAATGTGAGGAAAGAATGCA  
GTAAAGTGTCTTTATATTGGGTTCTTCTTCCATCATTCCATGCATTTACTTGGTGATTGGTGTTG  
TGCAACATTCATCAAATCATGAACTTGAAGCACTTAGTGGGCCGTAAGAGCAGTCGTATGTCATG  
GCAGATCCAATGACAACCTAAGACCCTTGAATAGGGAGCATTTAATTCCCAAGAAAGTACACC

AAAGGATATATAGCACTATTGTCTAAAAGTCTTTCCTTACCTCCTGCCACGACCTGTAAAGTAGA  
AAATTC AATTTAAGGACACA AACTTGTATCCACACAAAAAAGATTTAGGAAGCTACCGGAAAAG  
ATATTCAGAGACTTCCCAAAGCTTTAAGTTCAATTATCTCTGGCCTGAGTCGTCTTTAAGACTTG  
GGTGTGAAGTTGATGTTTGCCAAGCAACTTTACCCTTCCCCTGCTTTGCTACTTGCACCTCCAATG  
TAACTTCCATCCCACCCCCTTTTCCCAAAGAAGATATGACTACTTAAGATATTTTCCTGTTTTTC  
CCCTATCTTTCATTTTTTTGTGTCCCTATGCCCTCGACACATGCTTCCACTGACTGTTGATATCTGTG  
GTGTCAAGGCCCATGTTAGAGGTCACCAGATAAGGAAACAGTATAAACCAATCATATGGTCTGT  
GGGAATCCTGGAGAAGGTCATATTACGTTGGAGGCGCAAGGGTAGCGGTTTACGTGGATTTCGA  
CCAAATGCCATTAATAAAGTCCCAATCAACAAAATGATTCTCTGAAAGAGGATGATTATGATTA  
TCTCAAGGAGGGACGGAAAACAAAAGGAAGAAAAGATCCAAAAGGCCCTATCAAGGGTGAAGT  
CCATGGTTCAGTATCCAGAGGCACGTGCTCAATACCGGCGTCTGCTAAATGTTGTTGAGGACTTC  
CGTCAAACCAAGGTATTTGTTAACATCTGGCTGGTGTCTAAACTCTTTAATATTTGGCTTAATGAT  
ATGCTCATAGCTGTTTGATAACTGGCAGGCATCTAACAGGGTTTGATCAATTCTGAAGAGACAG  
TTGATGGTGTGGAGGATTTGATTGATATTGATATGCTTTTAGACGATGATAATTTCAATCCTATAG  
CATTGATTGATCCTGCAATGGCTACTCCCATCTTCCCCACTGTAAATACATGGCCAGTTTGGCTT  
TATTTGGCATTGGGGAGTCCTAACATCGTCTTGATGTATATTTCTAATCAA AATTACCCGGATC  
CAAAGGCTGCATATAAATAGATTATGATAGCTAGAATGCACTCTGGTTTGACAGTTAAGATATTG  
TAGTCTAATGAAACATGGTTTATAGAAGATTTTTTTTTTTTAAATAGGCAGATGGTTGGGGTTATA  
TCATAATGATGTA AACTTGCTAAAATATTAATCTGCAATGTGTACAAAAGGCGACTGTGGCGAGAG  
AAACTATATACTAAGTGCTAATTATGATTTATGATATCAAGCTTGTTCATCGTTT

>Glyma08G072100 (CAMTA4)

GGTGGTAGCTGTCCCGCCTGTCCGGGTTATTCACTTCGTCACGTCACTGTGTGAAAAGAAGCTGA  
CTGGAAAGAGCGAAAGAAAGTAAGAACGAACGAGCGAAAGCAAAAAAGTGTGTGTTGATTGA  
GATACTGCTAACTCCTTCAACGTTTACGCGTGGATCTCTCTCTCTCTCTCTGATTCTTCGGTCTTC  
GCCATGTCGGAGCGTTCGTCTTTCGGATTGGGACCTCGATTAGGTCACATTTTTTACTGATTCATTC  
GTTTGATTTTCTGCTTCTTTTTGTCTGAATAGAGTTAATATTTGATTGAGAGTTTTAGAATGCCTG  
ATCTTGCTGTTTGATTCTTTGTCGGAACGATTGCGCTCGCATAACCTGACTTCGTGAATTTTTGATT  
ATTGGTTGTAGGATTATGGAAACGAGTTAATAGATAGGGGGTTTATTTTTTTTGTGCGTGAAAAT  
CCGTTTAGGTTTTTTTATTGGAAATGACTTGGTTAGTTCAATTAGGGTTTTTGGGTGAAAATGAAG  
AAGCGTCTTTGATGGCATCTATGTGACTTTGTCTATTAGGTGTGAATGGCTTGGACTTCGGATTAG  
TATTGGTTTGCATTGGATAGAGTATATGCTTCAATGATGAAGAATTATAGAAGCTATTATTGTTGT  
AAATATGTATGGTACTATGTGCTAATTGGCTGAAAAGCCAATATGTGTCTGCTACAAATTGGGTTT  
GTATCACAGTAGCAGTTTGCATCTCTATTCCGAATGCTATAACAACTATATTCTGCTCTGCTTTCT  
CAATAGTAACAAATTTATGTGGCTTAAAGAAATCTTCTATGGCTACGTCCTCACTGGATTTTCAC  
TATGCGATGAGAGATATGCCTGGCAAGAGATTAGACACCTTTCCCTTTGACAATTTACAGAGAAGA  
ATAAGCTGCGTAATTGCTTTTTACCCATTTTCTCTTGGAAAAGTTTTGCTGCAAGATAATCTCTTTG  
CTTGCTTTAGCTTTACTGTCACAGGGGTGAAAATGAGCTGGACTGGGCCGGGCTGGGCCTTACCT  
AAGCTCGGCCTGGCCTGTTATATATTTCTATAGTCCAAGTCTCGGCTTGTTGCCCATCACGAGCCT  
ATTTTTTAGGCCAGGGCCTGGCCTTTATGTAAGCCTGTTTGCCTGTTGGTCTATTTAAAGGCTTGT  
TTCATATTAAGATGTGTAAAATAATTTTTTCTTTAACAAATCCAAAGTTTTTCATTA AAAATAA  
TAAGGTAATTTTAAACACAGGATGTGGCCAAAACCTTACCTAAAACATTACATGTGATACGCTAC  
CAAAGCATTTTAAAGCCCCACAAAAGAAAATAGTCCTTATTCTGCTATACTGTCTATGCTTATA  
GAAATTA AACTTATTTTAAATATTA AAAATGATTC AAATTGTCAAACCACTAAAATAATTTTATAATT  
TCATTA AAAATAATAATAATATTATACATCATATTAATAATAATTTTTTATAAAAAAATTTGTTG  
CTAAATAGGCTGGCCTTAACTGGGCTGGGTCATTGGCCCTCGACGGGTGTCCTGGCCTACTTCCA  
CCCCTACGTGAGCAACATACTCTGCTTCTGTGATAGGAAGAGACAACAATATTTGTAGTTGAGAT

GCTCAACTTAAAGCCCTTCCACCCAAGGTGTAAGCATAGTCAATAGTGTTCCTTCTGTTATCAAAA  
GCTCCACATAAGTATACTTTAATGCAACCTTACTGAGTGTCCCTTTTTAAAACAACGTGACTATGT  
ATTAGCTGTTACCTCTCAATTGCCAAAGGATCCATTTAAGTCTCTTGATGTTGCTTCCCTAATTAA  
ATATGAACCTGCTCATAACTCCACATGCTATAGTGAAGTACTCAGATAGAACCAGTTGCATGCTTTAGA  
CTACCAACTGCTAAAGCCTCGAAACTCGAGACATGAAATTAATTTCTTCTTATATACTGGGTAATT  
GATCTGTAGCCTGAAGTGACTTTATTCTCTTCTTATATAATTGGGTAATTGATCTGTAGCCTGAAGTG  
ACTGCTCTTAAGTGCTAACAAGTTTTGAATCTTACGTTGTTAATTTTCTCAACATCTTTTCAATA  
TTACCAGCTTGTAAGCTTCAAAGTAACTACTTGTCACTTTCTTCCAAACAGTTCTCATCCCA  
TGAATTTGATTTGTAGCTGCCTATTTTTAATAGCAAAATCTTTGGTAGTTGTTGTTTTAGCGTGT  
GACTGTGGTTGCTAGATCCTCTATTCATCAATGCATCAAATGAATAGGATAATATGGCATTAA  
AATTTAAACGAGCAGCAGCAGTAATCTGTATGACATCTCCTAAAGTGAATTAGTCATAGTTACA  
CATGAATAAATCAAATTTCTTATGCATGTGAGATTGTAAGAATTAAGTTATTATTGATATGATTA  
GTGTAGCTGTAGTTGATTCTTAAGGTTTGCCTCAGTCATTGCATTGTGCATGTGATGATATAGCA  
GTCCAATATTTAAGTGAATGCCATGTTCTATTATTATCAATATGCAGATCTTCAGCAATTACAAC  
TTGAAGCCCAGCATAGGTGGTTGCGCCCTGCAGAAATATGTGAAATCTTCGTAATTATCGGATG  
TTTCAAATCACATCAGAACCACCTAACAGGCCACCAAGTATGGTTTCTGCATATGTTACCGATCA  
ATTTATTAATGCCACCTATGCCAGTCTTGTCCATATATGGGTAGATTGAATTGCTCAAAGGCTTA  
AAATACTAATCCTCCATGAATTGTTGTTGCAACTGGGTATTTCTGAGGTTGTCTGGCAACCTTA  
TAGATGCCATTCATGGAGTTGGACATATCTGTTTTCTTGCAGCAAAAATATGAAATACTTAA  
ATATTTTGTCTTTCTTAAGTTGTTGACAACCTTATACATGCCAACCTTTTAGATCCCATAGGATCT  
TTGCTTCACTGCAAAGGGCACCTGATACATTGTAATCATGCCTGTATTTTCTAGGGTACTATTGAT  
AGTTTTGTTGCTCATGCTAAAATCTTGCTTCATTGTAACTTTAATTCATCTTTTCATGTATTCGATGA  
TTGCAGGTGGTTCCCTTTTTCTATTTGATCGGAAGGTTTTAAGGTACTTTAGAAAAGATGGACATA  
ATTGGAGAAAGAAAAAAGATGGAAAGACTGTGAAGGAAGCACATGAAAAGTTGAAGGCAAGC  
ATGAAATTTCTTTGTTGAGTTTGTGATTGATAAAATCTTTATAAGATCATATATATATATGTTATA  
ACTCCTATTATTCAGTTTGTCTTCTAATTGGAAAAACAACCTTTTATACCCCAAAAAAATTACTT  
GCTGAGATTGTAATTTCTTTGAACAATTAGGTGGGAAGTGTGATGTGTTACACTGCTACTATGC  
CCATGGAGAAGAAAATGAAAATTTTCAAGGGCGAAGCTATTGGATGCTTGAAGTGTGAGTGCGA  
TGAAGTGGTTTACATTTCAATTTTGTTTAATTTGTCGTTGAAGTACTATATTATCCATG  
GCAGTTGCTGTCTGAATTTCTTAAGTACTGCATTACTACTTAGTAGCATAAGTATATTTGTAA  
TTGTATTTGGAGTCAGTTAATAGTTAATTTATAACAAGTATATATTACTGGACTTGACTGTTTTTGT  
GTTTCTCAGAAAATTTTTAGTTCCCAATATTCTACTGAAATAATTTATTTTTAATAAAATTAATTA  
GAATGTGAATTTGTTTTGCTGCAGGGATATGATGCATATAGTATTTGTCCACTACTTGGATGTTAA  
GGTATTTGTTTGTCTTTATTTTCGCACCTTTCTTATTAAGGTATTTGCTTCCCTACTAGAGCAAG  
AAATATATCATTGCACAGCCTTGTGTTGGTGAATTTAACCAGAGTGTGTAAGTGTGATGACA  
TCTAGTAGCTCAAGCCTAGTCTTTGGAGTTTTTTATCCTTAAGACTTCCCTCTAAACTTGATGGAG  
GAAATAGAGTACTAGTGTACTACTGTACAAGTACTATTTTCCCTTCCCTTAAACATTGAGTATAATG  
TGAACAGATAATCTATCTTCCATCTGATTTCTTCAATTTCTTACCATCATGGATTGGAGAATGT  
GCTTCATAAATTGTAAGCCTGGATAGCAATGTTAAGAACATCCACCAAATGCATACTAACATGCA  
ATATTTGTTGCTGGTCTGCTGCTAAATTTATGTTTTTCACTTTTTACCAAGAGAAGACATCCTTGAT  
TTTTAATCTTCAAGAACCCCAATTGATGATATTGAGTAAGTTGCATAATCATTTTGAAGATCCT  
GAACTCTGTTTCTATAATATTCTTGAAATCAGGCAGAAAACTTTTGAATCCAATATTGATTCACTT  
GTTGATCATTGATGACCTATTGACTTAATTAATAGGTGTTTTCTGGGTTCTTCGTTCTTTCAGGTT  
AACAAAACCAATATTGGTGGAAAAACATATTCTGATGAGGTTACATCAGATTCCCAGAAGAGCA  
GTTCTTTGTCATCTGGCTTTCCAGAAATTATGGTAGTATGCCTTCAGGAAGTACAGATTCCATGA  
GCCCAACGAGCACTTTGACATCTTTATGTGAAGATGCTGATTCAGGTAACCTCTGATATATTTAATG  
GTTGTTACACTTAATTTCTTTGATCTGAATTTAACGTGCCAATGCTTTAAATATCATGGTTTACTAT  
TATGCCATACTCAAGTGTGGTCCATTTGGTCTAACTGGTTAATCAAACCTTCTCCTAGAGGAT

ATTCATCAAGCAAGTTCAGGATTACACTCCTATCGTGAATCACAAAATTTGGGGAATGATCGTCC  
GATGGATAAGATTCATGCTCGTTCAAATAGTTCCTATCTTATGCATCCATTTTCAGGTTATCTCATC  
TTTTTATTCTTATTGGTCTTAGTCTCTAAGATGATTATGTTGTTTAAATTCTATAGTTTTATGCATAG  
AGGGAGGAAAAGGAGATCAGGAGACTGAATACATTGATACTGATATAAACTTTATTTGATATGA  
TGTTTTACCTGTGTTT CAGAAGTGATACAAAACACAAAATACTAATCCCTATTTAAATAGGAAAAC  
AAATCACAAAGAAAATAAGGAAATATGGAAACTAGTCTTTAGATGCTCTAAATTAAGATAACAATC  
AAGATATTGGATTTTTTTTTTTTTGTATATTCTCACATATTTAATATCTTAAATAACATCTGATTAATA  
AGCTTTTCCTGGGATTTGACATTTGAATTTTGTGTATGTTTTGAAACGTTTTTCAGATAATCATGGG  
CAGTTACCAGTTTCTGGAGCAGAATATATCCCACATGTT CAGGGGAATAAGTCTAGAGCTAGTGA  
TACTACTTACATTGAGGGTCAGAGAGCACATGGCATTGCATCCTGGGACAATGCCATGGAACAG  
TCTGCAGGAAAGCATGCTGATCCTTCTCTTGTATCATCTACGTCCATTCCATCAAGTGCAATGGGA  
AACATACTTGACAAAACCATACTGTTCCAGGCAACCTTTTAGGGCATAAAAATTGCCCTCACTGA  
AGTGGAAAGGGGCGCTCAGCCTGTCCAATCAAACCTGGCAGGTACTTACTGTTATTTCTCGCTATA  
TCTTCAGTAGTGTACTCTTGCTTGCATGCATATACTGATGTCTCAGCATAAATATGAGTATTCTTG  
AGGTTCTCTTAGGAACAGTTGTGCTATCTTGTGGATGGGACAATTTATGGAATTTTCTGTCCCAG  
AAACCATAGTTTCTGCAATTGTGGTGGAGCGGCACCCTGCTCCTCCTCAAGGGCAGTCATGGTG  
TGGTGTGGTGCATTT CACGGCAAATACTGGGCACTTTTTCAGAGGAGGCATCGAATCTTTATGCTTC  
TTAGCAATCTATTTATAATTTTGTCTAGAGCACCTGCTTCTGTTTTGCACTTCTGCAACACTTCT  
GTCATGAACCTCTGTTTTGCAACTTCCAGCAGTGCAAAAATAGAGTGACCATCACGCTATCCAT  
TATCCGGCTATAGCATTTTTTCCCGGGAGGGGGGGGGGGGGTCTCTGCGCTATTACCCGCT  
ACTGACTACTATGCTAGTTGATTAAGTTTTAAGTGCATTCTGTGTTGTTGCTAATGGACTTTATGCT  
TGATGAGGTGTGATGGTTCACCTATCTTTTATCTTTGAAAAGAATTGCTTGAGGAGGGGAAGCT  
AGGGAAGGTGAGAATTTGTGGGAGCTGTTGCTTCATATCAAAGAATATTAAGAGATTCTAGAA  
GATGGATTTGTGGAAAAGTGGCCTGGGAATATACAGTTTCTTTCAGGGAGTTAGTCATTTAGC  
CATGTATTTTAAATTTTTATTAAGTTGCAATACAATAGAATGATGAATTAGGATAGAGCTTATTCC  
TAACCTCTTGTACTGGTGTACATGTGTAGAACTGAATGTTTTGAATTGTTTCTGAACTTGTAGAA  
ATGCTAAAGAACATAGTAGTGCTTATCTTAAATTTTTGCTAGACTTTCTTTTTTACTTTATGTTTGT  
CTAATGTATCCTTATTTAATCTGCTGAGATGAGAATTTAGTAGTTTGATGGAGGGAGTGGCCTTGC  
ATTAGTTTGGTGTCAATTTTATATTTGATCTGTAACCCTGATGTTTTAACTTGTAGTGGTATCTCAT  
AAAAAAATTTAATCTGCACTACTTTGTGAGATTTAGCAATGACGTATAACTATTTTCATTTTGTTA  
TTTTAATTGTTGATTCAGATTCCTTTTGAAGACAATACTGGAGAATTGCCTAATTGGGGCTTTACC  
CAATCATTGGGTTTGAATTTGGATCTGATTATGGTACTAGTTTACTGGGGGATGTAACTAATAAT  
GCAGGCCAGAAATTGATCCTGAGCTGTTCACTTTTAAATGGTGAATAAAAGAGCAGTATACACA  
TGGGCAATCTCAACCTGCACTGAAATCCAATTCTGCGTATGAAGTTCCTGGTGAAGCAAGTATCA  
ATTATGCCTTGACCATGAGGCGTGATTATTGGATGGAGAGGAGAGCCTCAAGAAGGTTGATAG  
TTTCTCTAGGTGGATGACCAAAGA ACTTGCAGGTGTGGATGATCTGCATATGCAGTCTTCCCCTG  
GTATTTTATGGAGCACAGATGAATGTGGGGATGTGATAGATGATACATCATTGCACCTGTCCCTG  
TCTCAAGACCAGCTGTTTAGCATAAACGATTTTTACCTAAATGGGCTTATGCTGAATCAGAAAT  
TGAGGTAATTTGTCTGAGATTCACACAATTATAATATATATTTTAGCAACCATTTATGGTTGTGCA  
GTTTGTTCCTTTTCTTGTATGTCGTGAGCATAAGTAATTAATATGTATGGCAGTTGGATTCTAC  
TTTAGATTTATATCTTTTTGCCTTGGATATTGACAGCCTTTTTTTCAGGTCAGATGCATATAGTTTTGT  
TCTTTATTTATTTGAATATTCCCAACATGTATCTCTTCTCGTTGTTACTGAATATTTTTTGTATTTT  
GGTGTATCCAGTATCCTGTTGATATTCTTTATTTGCTTTGGAGTTTTATACATATTAATGGTTCACTC  
ATTTTTCTATGGGTTTCTACCAAATATGAAATGAAGAGAAGTCAGCTGTAATTTGACTTATATCT  
TATCCTATTCAAACCTATACAGGTGTTGATTGTTGGAACATTTTTAAAGAGTCAACCTGTGGTGGC  
AAAATGTAACCTGTTCTGTATGTTTGGGGAAGTGGAGGTTCCCGCTGAGGTTTTAGCTGATGGAA  
TTTTGTGCTGTCAAGCTCCACCTCATAAGATTGGACGGGTTCCCTTCTATGTAACATGTTCCAATA  
GGTTTGTGTTAGTGAAGTTCCGGAATTTGAGTACAGAGAGGGCTTCGATAGAAATATAAATTTT

CCAGATTTTTTTAACAATTCAAGTGAAATGGAGCTTCATTTGCGACTGGTGGGGTTACTTTCGTTA  
AACTCAATGCACACTTTAAATCAAGTGTTGAGGGTGATATGGATAAAAAGAACTTAATATTCAA  
GCTTATTTCACTGAAAGAGGAAGAGGAATATTCAAGTAAGGAAGAGACAACCTGCAGAGATGGA  
TATATCACAACAGAAGTTGAAGGAGCATATGTTTCACAAGCAGGTTAAGGAGAAGTTGTA  
TGGCTTCTTCACAAAGTTACTGAACTGGTAAAGGGCCTCTTGTATTAGATGAAGAGGGGCAAGG  
CGTGTACACTTAATTGCTGCTCTTGGTTATGATTGGGCTATAAAATCCTATCATAACTGCTGGAGT  
CAATATCAACTTCCGTGACGTGAATGGATGGACAGCTCTACACTGGGCTGCATTCTGTGGCCGGT  
AAAGACCTAATTTCTTTAATTGTATTGAGTTGATTTTGTGTATGTTGGAACCTAATTATCTGGGTGA  
AACCTCTTTGCTACCCTGATTATTTCTTTTCCAGAGTTTTGGAATTTTGGATTTGATTAATATG  
AAACCATTAGGTGGTATGAGAATTCTAGCCCCCTTCTTTAGGAAATGTCTTCTTTTTTTTTAAT  
TGTTAATATTTATTTTATTTTATTTGATGCCAAGGTTGGTGGATTTTTTATACATGTGAATTTGTTCAAAA  
ATAATTTTAAAGCAATTGCTTTGGTTAGTTACAGACAAATTTAAAGCTATATTCTGTGATGCTTTC  
AGCATTAGAGTATTCCTTTCAAATGTCCTCAGATATATTATCTTCATTCAGCATAACATGAATT  
GGTTCCTAATATTATTATTTGTCTCTGCTCAGAGAGCGAACAGTTGCTGTCCTTGTCTCCATGGAT  
GCAGCCGCTGGTGCATTGACAGATCCATGTCCCGAATTTCTTTGGGTAGAACACCTGCAGATCT  
TGCTTCTAGCAAAGGCCACAAAGGAATTTCTGGTTTTCTTGCTGAGTCATTATTAAGTCCACCT  
CGAATCACTCACAATGGATGAAAATAAAGATGGTAGGAAAGAACTTCAGGAATGAAAGTAGT  
GCAGACAGTTTCAGAGCGAACTGCGACACCTGTGCTTAATGGTGATATACCTGATGATATCTGCC  
TTAAGGATTCTTTAATGCTGTCCGTAATGCTACACAAGCTGCTGATCGTATATATCAAGTATTCA  
GAATGCAGTCATTTAGAGGAAGCAGTTAGCTCTGTATGAAGATGATGAATTTGGATTGTCAGAT  
CAACAAGCTCTTTCTCTCCTAGCTTCTAAGGCGTGCAGATCTGGTCAAGGAGAGGGTTTAGCCAA  
TGCTGCTGCAATACAAATACAGAAAAAGTTTCGTGGTTGGACGAAGAGAAAAAGAAATTTGATT  
ATTCGCCAAAGAATTGTTAAAATCCAGGTTCAATTGTTCTGCTCTCTTTATTTTCTGTCTGTATTTT  
ACAAGGCAAATTATAAATTTAGTTGCTACATTTTGTGTTGTCCTACATGAAAAAAACTACATT  
TTGGTCCCTACGTGAAAAATTGCTTACATATTTGTCCTTAACTGCCTAATGAAGTCTAAAGGTGT  
TAGTTTTTTCATATAGGGACCAAACTAAAAATGGATCTGTCCGGTGTAGGGGCCAAAAATAAAGT  
GTAATTTTCGTTTTATGACTAAAATGAAAAATGATGTTATTGTGTTAAGTAGAGAGGGGCAGT  
ATCTAATACCGTACCTCGATTTACTATTTGTACCTTGCATATTATTATTTTATTTTATTCTTATTTA  
TATTATTATATAAAGATAGTCTATAATCACTAGAATTTCTATATATTATACTTAGTATATTGTAAT  
GTTGCCAAACAGCAGGGATCAAATCATAAATGTTTGTTCATGTAGGAACTAAAATGTAGAATTTA  
TGGAAGGTGTAGAACTAATGTTTTCTCATTGAACATCCTATCAACTATTCTGCTATTTAGTTTCA  
CCTGATAACATTGCATTGGAGGGTTCAATTGATGAAAACCTCGGGAGGAATGCTAAAATCCTTTT  
TTATCAAATACTTCCCCATCTCTGTTTGCCTTTATATATATAACTTGCACGCACATAGAGATC  
ACGTTGGGTGTCAATATTGATAATGATTTCCAGTTGTAAAGAAATCAGAGGTTAATAGAAATCAT  
GTTTTGCGGCCGTTCAATTTCTGTTGATGTCTTTTCCATCTCTTCTTTCTGAAGTATTTGCAGTCTGG  
TTGCCGTAGAAGGCTGGAGATTGAGCTCCCTTTTTCTGTGTTAATATTTTATATGTGCTCTTGTA  
CATTTTATGCATCCTTCTACTGACTTGAAGTCCATGGTGTCAAGGCCATGTAAGAGGTCACCAGG  
TCAGGAAGCAGTATAAACCAATCATTTGGTCTGTGGGAATCCTGGAAAAGGTTATATTACGCTGG  
AGACGCAAGGGCAGTGGTTTACGTGGATTTGACCAGCTTCCGAGAACAAGGTCCCCGAACAAC  
CAAGCGAATCTCCGAAAGAGGATGACTATGATTACCTCAAGGAAGGAAGGAAACAAAGTGAAG  
TGAAGTTCAAAAAGGCCCTTTCACGGGTGAAGTCCATGGTTCAGTATCCAGAGGCACGGGCTCA  
ATATCGGCGGGTGCTAAATGTAGTTGAGGACTTCCGTCAAACCAAGGATTTTTCTAAGTTATGTCT  
TGCCCTACGTATAAACTCATGATCAATACTTGCCTTAATGATATGTTCTTTTGTGCTACCAGGG  
AGGTAATTTGAATTTGATAAATTCGGAAGAGACAGTCGACGGTGTGGAGGATTTGATTGATATTG  
ACATGCTTTTAGATGATGAAAATTTCTTACCTATAGCTTTGATTGATTCTCTGCTGTTGCTCCACC  
CACCTCCCCGGTAAATAGATGGCCAGTTGGTTTTATTTGGCATTGGAGAGATCCTAACATCGTGT  
GCTGCTGTATATATTTATATTTATGTATAATGTACAATCAGAATTCCTTGGATCATAGGTCTTCCCTG  
TTTTCTAGCAAAGAAGTACTAGTTAGATCCAAGGGTGGGTTATAATAGATTATGGAACCTAGAATGCC

TTCAGGTTTGGTAGTTCGGATATATAATATACATGGTTTAATTTTATATATGGTGATTATGTATATG  
ACAGGATGATTTCAATTTAGATTGAAGTATGTTTTTAATTCTTAAATTTGTATCATTTTTTAAAAATT  
TAGTCTTATTATAATTTCTGTTTT

>Glyma05G117000 (GmCAMTA5)

CGCCTATTCGGGTTATCCCTTGGTCACGTCACGTGTGTGAAAAGAAGCTGACTGGAAAGAGCGAA  
AAGCGAAGAAAGTAAGAACGAACGAAAGCAAAAAATTGTGTGCTGATTGAGATACTGATAACT  
CCTTCAACGTTTCCGCGTGGATCTCTCTCTGATTCTTCAGTCTTCGCCATGGCGGAGCGTTTCGTG  
TTTCGGATTGGGACCTCGATTAGGTCACTTTTTTTTTATTATTGATTCAGTCGCTGATTTTCTGCTTCT  
TATTGTCCGAATAAAGTTTAATATTTGATTAAGAGTTTTAGAATGTCTGATCATGTAGTTTGATTTT  
TGTTGGAACGACTTCGCGTAACTTTCGTGAAAATTTTTATTTTGAATGTTGGTTCTAGGATTAT  
GAAAACGAGTTAATCGATTGGGGGTTTCATTTTTTTGTGTGAAAATTCGGTTTAGGTTTTTTTTTTT  
TTTGCAAATGACTTGATTAGTTCAATTAGTTTTTTTTTTTTTTGGTGAAAATGAAGAAGCGTCTTTG  
ATGGCATTACGTGACTTTCTGTTAGGTGTGAATGGCTTGAACCTTCGGATTGGTATTGGTTTGCATT  
GAATAGAATATTTGTTTCTCTGATGAAGAACTGTAGTTAGAAGCTATTATTGTAGTAAATATGTAT  
GGTACCTGTGCTAATTGGCTGAAAACTAATATGTGTCTGCTGCAAATGGGTTTGTAGCCCAG  
TAGCCGTTTGCATCCGTATTCCGAATGCTAAAACAACTATAGTCTGCTCTGCTTCTCTATAGTA  
ACAAATTTACGTGGTTCAAAGAAATTTTTCTATGGCTATGTCCTCATTGGATTTTCACTTTGTGATG  
AGAGATATGCCCAGGAGATTAGACACCTTCCCTTTCAATTTACCTTAAACAATTTAGAGAG  
AGAATAAGATGCTAATTGCTTTTTACCCATTTCTCTAGGAAAAGTTTTACTGCTAGATAATCTC  
TCTGCTTGCCTTATCTTTACTGACAGCAACTACTCTGCTTCTGTGATTGGAAGAGCCAGCAATAT  
TTGTAGTTGAGATGCTCAACTTAAAGCCCTTCCAGCCAAGGTGTCAGCATAGCCAATAGTGTTCCT  
TCTGTTATCAAATCTCCACATAAGTATACTTTTTGCTGAGTGTCACTGTTAAAACAACCTTGACTA  
TGTTGTATTAGCTGTTACCTCTCAATTGCCAAAGGATCCATTTAAGTCTCTTGATGTTGCTTCCCTA  
ATTA ACTATGAACCTGCTCATAACTCCACATGCCATGCTATAGTGGCTCAGATAGAATCAGTTG  
CATGCTTTAGAGTCTTAGACTACCAACTGCTCAATCTTTGGGTAATTGAAATTATCTTTTTTTCTA  
TATTGGGTAATTGATCTGTAGCCTGAAGTGACATGCCACCGAAGTGCTAACAACTTTTGAATCTT  
ACATTGTTAATTTTCTCAACACCTTTTCAATATTACCAGCTTGTAAGGCTTCAAACCTCAAACCTAC  
TTGTCACCTTTCTTCAAACAGTTATCATCCTTGAATTTCTTTGTAGCTGCCAATTTTTTAATAGCA  
AAATCTTTTAGTAGTTGTTGTTTTAGCATGCTGATACTGTGGTTGCTACATCCTCCATTTACAATTG  
CATCATTGTAAATTAATAGGATAAATAGGCAATCATCAATGTTTTAAACGACCAGCAGCAGCAGC  
CGTAATCTGTATCACATATCCTAAAGTGAATTAGTTATAGTTACACATGAATAAATCAAATTTCTT  
ATGCATTTGAGATTGTAAGAATTAAGTTATTATTGATATGATTACTTGATTAGTGTATTGATATG  
ATTACTTGATTAGTGTGGCTGTAGTTTGATTCTTAAAGTTTGCTTCAATAATTGATTGTGCATGTG  
ATAATATAGCAGTCTAATATTTTAGTGAATGCCATCTTCTATTATTTATCAATCTGCAGATCTTCAG  
CAATTACAACCTTGAAGCCCAGCATAGGTGGTTGCGCCCTGCAGAAATATGTGAAATCTTCGCAA  
TTATCAGATGTTTCAAATCACATCAGAACCACCTAACGGGCCACCAAGTATGGTTTCTGCATATG  
CTACTGATCGATTTATTAATGCCACCTATGTCAGTCTTGTCCACATATGGATATGGGTAGATTGAA  
TTGCTCATAATGCTTAAAATTGCTAATCCTCCTTGAATTGTTTCTTGCAATTTTCTCTGTATTTCT  
TAAGGTTGCCTGGCAACCTTATAGATGCCAATTATGGAGGTTGTACATATCTGCTTTTCTTTTGA  
GCAAAGACTTAAATATTTTTGTCTTTCTTAAAGTTGTCTGACAACCTTATACATGCCAACCTTTTA  
GATCCCAAAGATCTTTGTTTCACTGCAAAGGGCACCTGATACATTGTAATCATGTCTGTATTTTC  
TAGGGTACTATTAATAGTTTTGTTGTTTCATGCTAAAATCTGGCTTCATTGTTAACTTTAATTCATCT  
TTTCATGCATTCAATGCTTGCAGGTGGTTCCCTTTTTCTATTTGATCGGAAGGTTTTAAGGTACTTT  
AGAAAAGATGGACATAATTGGAGAAAGAAAAAGATGGAAAGACTGTGAAGGAAGCTCATGA  
AAAGTTGAAGCAAGCATGGAATTTTCTTATGTTGAGTTTGTGATTGATGAAATCTTTATAAGAGC  
ATACATATATATATATATTATAACTTATTATTTCAGTTTTATTTTTCTCTAATTGGAAAACAAGTCT

TTATACCCTAAAAAATTACTTGCTGAGGTTGTAACATCCTTTGAGCAATTAGGTGGGAAGTGTTG  
ACGTGTTACACTGCTACTATGCCCATGGAGAAGAAAATGAAAATTTTCAGAGGCGAAGCTATTG  
GATGCTTGAACCGTGAGTGTGATGAACACTAGTTACATTTTCAATTTTGTAGTAATTGCTTTAAAC  
TTGAAATACTACTACTTTATTTTCCATGACAATTGCTGTCTATATTTCTTACTAAGTACTGGCATT  
CTACTTAGTATAGCATAAGTGTATTTATACTTGCATTTGGAGTCAGTTAATAGTTAATTATAACAA  
GTATATAACTATATATTACTGAACTGGACTGTTTTGTGTTTCTCAGCAAATTTTAAGTTCCCAAT  
ATTCTACTGAAATAATTTATTTTTATTAATAAATTAAATTAGAATAAGAATTTGTTTTGTTGCAGGGAT  
ATGATGCATATAGTATTTGTTCACTACTTGGATGTTAAGGTATTTTGCTTGTTCCTTTATTTACAC  
TTTTTTATTAAGATATTTGCTTCTTACTAGAGCAAGAAATGTATCATTGCTTGGTTTTGTTGCCG  
GTGCAGTTTTGACCTGAGTGTGATGACATCTAGTAGCTCAAACCTAGTTTGTTCGAGTTTTTTTT  
GTCCTCAAGACTTCCCTCTAGAATTGAAGGAAGAAATAGAGTACTAGTGTACTACTGTACAAGTA  
CTATTTTCATTCCCTTAAACATTGACTATATGTGAACAAATAATCTATCTTCCATCTGACTTCCCTC  
TAAGTTTCTTACCATCATGGATTGGAGAATGTGCTTTTTTAATTGTAAGCCTGGATAGCTATGTTA  
AGCATTATAACATCCACCAAATGCTAACATACTAACATTCAAATTTGCTCTTCTGCTACTAAATTT  
ATGTTTTTCACTTTTTACCATGAAAAGACATCCTTGGTTTTTAATCTTCAGAAATCCCATTTGATGA  
TATTGAGTAAGTTGCATAATCCTTTTTGAAAAGATCCTGAACTCTGTTTCTATAATATTCTAGAAAT  
CAGGCAGAAAACTTTTGAATTCAATATTGACTCACTTGTGATCATTGATGACTTAGTATTAATA  
GGTGTGTTGTTGGGTTCTTACCTTTACAGTTAACAAAACCAATGTTGGTGGAAAAACATATTCTGA  
CGAGGTTACATCAGATTCCCAGAAGAGCAGTCTTTGTCATCTGGCTTCCAGAAATTATGGTA  
GTGTGCCTTCTGGAAGTACAGATTCCATGAGCCCAACAAGCACTTTGACATCTTTATGTGAAGAT  
GCTGATTCAGGTAATTCTGATATATATTTAATGGTTGTCACACTTAATTCTTTTGATCTGAATTAAC  
ATGCCAAGGCTTTAAATATCTTGGTTACTGTTATGCCATGCTCACATGTTTGGTGCATTTGGTCTA  
ACTGGTTAATCAAACCTTCTCCTAGAGGATATTCATCAAGCAAGTTCAGGATTACACTCCTATCG  
TGAATCACAAAATCTGGGAATGATCGTCCGATGGATAAGATTGATGCTCGTTCAAATAGTTCAT  
ATCCTATGCATCCGTTTTACAGTTACCTCATCTTTTTATTCTTATTTGTCTTAGTCTCTAAGATGATT  
ATTTTGTAACCTTCTATTTGTTTAAATTATATAGTTTTATGTATAGAGGGAGGATAAGGAGACTGG  
GAGACTGAATACATTGATACTGATATCAACTTTATTTGATATGATGTTTTACCTGTGTTTACAGAAAT  
GATACAAAACACAAAATACTAATCCCTATTTAAATAAGAAAGCAAATAACAAGAAAATAAGGA  
AATATGGAACTAGTCTTAAGATGCTCTAAATTAATATAACAATCAAGATATTGGATATTTTTTTGT  
ATATTCTCACATATCTAATGTCTTAAATAACATCTGCATTAATAAGCCTTTTCTGGGATTTGACATT  
TGAATTTTTTTGTATGTTTTGAAACGTTTTACAGTGATCATGGGCAGTTACCAGTTTCTGGAGCAG  
AATATATCCACATGTTCTGGGGGATAAGTCTAGAGCTAGTGATACTACTTACATTGAGGGTCAG  
AGAGCACAGGGCATTGCATCTTGGGACAATACCATGGAACAGTCTGCAGGAGAGTATGCTGATC  
CTTCTCTGTATCATCTACAACCATTCCATCAAGTGCAGTGGGAAACATCCTTGAAGAAAACCAT  
ACTGTTCCCTGGCAAACTTTTAGGGCGTAAAAATGCCCTAACTGAAGAGGAAAGGGGCTCTCAGC  
CTGTCCAATCAAATTGGCAGGTACTTACTGTTAAATTTCTCGCTATATCTTCCCGTAGTGTACTCTT  
GCTTGCATGCATACATCTGATTTCTCAGCATAAAGATGAGTATTATTTGAGGTTCTATTAGGAACA  
GTTGTGCTATCTTGTGATGGGACAATATCTGGAATTTTCTGTCCCAGAAACCATAGTTTCTGCA  
ATTGCGGTGGAGTGGCACCCCTGCTCCTCCTCAAGGGCAGTCACGTCGTGGTGTGGTGCATTCCA  
TGGCAAATAGCGGGCGTTTTTACAGAGGCATCAAATCTTCATGCTTCTTAGCAATCTATTCATTTGT  
TCTAGAGCACCTGCGCTTCTTCTGCTTCTGTTTTGCACTTCTGCAACATCTTCTGTCATCAACC  
TCTGTTCTGCAACTTCCAGCAATGCAAAAAATAGAGCAACGATCATGCTATCCATTATCCTGCTA  
TAGCATTTTTTCCCTGGGGGGCTTTCATCTTTGAAAAAGAAATAATTGCTTGAAGGATGGGGAAGA  
TGAAAATTTGTGGGAGTTGTTGCTTGATATTAAGAAATAAAGAGATTCTAGAAGGTGGATTTA  
TGAAAAAGTGGCCTGGGAATACAGTTACTTTTTTTTTCCAGGAATTAGTCATTTAGCCATGTATT  
TTAATAAGTTGCAATACAATATAATGATGTATTGGGATGGAGCCTATTCATAACTTTGTGTTACTG  
GTGTACATGTGTAGCACTGAATGTTTTGAATTGTTTCTGAACTTGTAGAAATTCTAAAGAACATAG  
TAGCGTTTATCTTAAATTTTTATTACAGACTTCTTTTTTACTTTATGTTTGCCTAATGTATCCTTAT



TTAATCTGCTGAGATGAGAATTAAGTAGTTTGATGGGGGAGTGGCCTTGCATTGGTTTGATGTC  
AATTTTATATTTGATCTGTAACCCTGATGTTTAACTTGTAGTGGTATCTCATCAAAAATCTTTTATC  
TGCAGTATTTGTGAGATTTAGCATTGATATATACTATTTTATTTTGTATTTTAAATTGTTGATTC  
AGATTCCTTTTGAAGACAATACAGGAGAATTGCCTAATTGGGGCTTCACCCAATCATTGGGTTTG  
GAATTTGGATCTGATTATGGTGCTAGTTTACTGGGGGATGTAACATAATAATGCAGGCCAGAAAT  
TGTTCTGAGCTGTTCACTTTAATGGTGAGTTAAAAGAGCAGTCTGTGCACCAAACTTCTCAAA  
GCTGTATACACATGGGCAATCTCAACCTACACTGAAATCCAATTCTGAATATGAAGTTCCTGGTG  
AAGCAAGTATCAATTATGCCTTGACCATGAGGCGTGGATTATTGGATGGAGAGGAGAGCCTCAA  
GAAGGTTGATAGTTTCTCTAGGTGGATGACTAAAGAATTTGCAGGTGTGGATGATCTGCATATGC  
AGTCTCCCCTGGTATTTTATGGAGCACAGATGAGTGTGGGGATGTGATAGATGATACCTCATTG  
AATCTGTCCCTGTCTCAAGACCAGCTGTTTAGCATAAATGATTTTCTCCTAAATGGGCTTATGCT  
GAATCAGAAATTGAGGTACTTTGTTTGTGATTACACACAATTATAATATATATTACTTATGGTTGTG  
CTGTTTGTCTTTCTTTCTTGTATGTCGTGAGCGTATGTATGGCACTTGGAACTACTTTAGATTAAT  
ATCTTTTGCCTCGGATATTGACGGCTTTTTTTTGGAGGTCAGATGCATATAGTTTTGTTCTTTATTTAT  
TTGGATATTCCAATGTGTGTCTGTTCTTTTGTAAATGAATATTTCTTGTATTTTATGATATATCCT  
GTTTATATTCTTTATTTGCTTTGGAGTTTTATACTTATGGTTTACTATTTTTCTATGGTTTTCTACCA  
CAACATGAAATGAAGAGAAGTCAGCTGTAATTTGACTGATATCTTATCCTATTCAAAATTATACA  
GGTGTGATTGTTGGAACATTTTTGAAGAGTCAACCTGTGGTGGCAAAATGTAACCTGGTCTGTAT  
GTTTGGGGAAGTGGAGGTTTCTGCTGAGGTTTTAGCTGATGGAATTCTGTGCTGTCAAGCTCCACC  
TCATAAGATTGGACGGGTTCCCTTCTATGTAACATGTTCCAATAGGTTTGCTTGTAGTGAAGTTCG  
GGAATTTGAGTACAGAGAGGGCTTTGATAGAAATATACAATTTGCAGATTGTTTTAACAATTCAA  
CTGAAATGGTGCTTCATTTGCGACTGGTGGGGTACTTTCTTTAAACTCAGTACGCCTTCAAATC  
AAGTGTGTTGAGGGTGTATATGGATAAAAGAAGCTTAATATTCAAGCTTATTTCACTGAAAGAGGA  
AGAGGAATATTCAAGTAAGGAAGAGACAACCTGCAGAGATGGATATATCAAAACACAAGTTGAA  
GGAGCTTATGTTTACAAGCAGGTTAAGGAGAAGTTGTACTCATGGCTTCTTACAAAGTTACTG  
AAACTGGTAAAGGGCCTCTTGTATTAGATGAAGAAGGGCAAGGCGTGTACACTTAATTGCTGCT  
CTTGGTTATGATTGGGCCATAAATCCAATCATAACTGCTGGAGTCAATATCAACTTCCGTGATGTG  
AATGGATGGACAGCTCTACACTGGGCTGCATTCTGTGGCCGTAAGACCTAATTTCTTTTATTTG  
TTTTGAGTTGATTTGGTGTATGTTGGAACACTTATCTTGTGAAACCTCTTTGGCTACCCTGATTA  
TTTCATTTTTCCAGAGTTTTGGAATTTGGATTTGATTAATATGAAACCATTAGGTGGTATGAAA  
ATTCTGGCCCCTTCTGTAGGAAATGTCTTTCTTTCTTTTTCATTGTTAATATTTATTTCTATTTTGA  
TGCCAAGGTCGGTGGATTTTTTATACATGTGAATTTGTTGAAAATTAATTTTAAAGCAATTGCTTT  
GGTCAGTTAAAGACAAATTTAAAGCTATATTCTGTGATGCTTTTACGATTAGAGTATTCCTTTTCA  
AAAATGTCCTCAGATATATTATTTTCGTTTACGATAACATGAATTTGGTTTCTTATATTATTTTGT  
CCTCTGCTCAGAGAGCGAACAGTTGCTGTCCTTGTCTCCATGGGTGCAGCAGCTGGAGCATGGAC  
AGATCCATGTCCAGAATTTCTTTCGGGTAGATCACCTGCAGATCTTGCTTCTAGCAAAGGCCATA  
AAGGAATCTCTGGTTTTCTTGTGAGTCATTATTAAGTGGCCACCTTGAATCACTCACAATGGATG  
AAAATAAAGATGGTAGGAAAGAACTTCAGGAACGAAAGTAGTGCAAACAGCTTCAGAGCGAA  
CTGCGACACCTGTGCTTTATGGTGATATACCAGATGCTATCTGCCTTAAGGATTCTCTTAATGCTG  
TCCGTAATGCTACACAAGCTGCTGATCGTATATATCAAGTATTCAGAATGCAGTCATTTTCAAGG  
AAGCAGTTTGTCTCAGTATGAAGATGATGAATTTGGATTGTCAGATCAACAAGCTCTTTCTCTCCTA  
GCTTCTAAGACGTGCAAATCTGGTCAAGGAGAGGGTTTAGCCAATGCTGCTGCAATACAAATAC  
AGAAAAAGTTTCGTGGTTGGACGAAGAGAAAAGAATTTCTGATCATTGCCCCAAAGAATTGTTAA  
AATCCAGGTTCAATTGTTCTGCTCTTTTAGTTTCTGTCTGTCTATATTTAATTAGGTAAATTATAA  
ATTTAGTCGCAAAGGACGAGCCCTGGTGCAGCGGTAAAGTTGTGCCTTGGTGACTTGTGGTTCAT  
GGGTTTCAATCCGAAACAGTCTTTTGCATATGCAAGGTTAAGGCTGCGTACAACATCCCTCCC  
CCATAAATGGGGTACGAAGTTTTTTATAAATTTAGTCGCAATATTTTTGTTTGGTCCCTACATGAA  
AAATTGCTTACAAATTAGTCCTTACTGTTAAGTCTTAATGGTGTTAGTTTTTGTATTTTTTTCATATA

AAACTAAAAATGATCTGTCGGGTGTAGGGAAGTGTA AAAATTTTCGCTTTATAACTAAAAATGAAA  
AACGATGTTATTTTGTAAAATAGAGAGGGGCCGAATCTAATACCGTTGTAATGTTTCCAAACAGC  
AGGGATCAAAATCATAAATGTTTGTTCATGTAGGA ACTAAAATGCAGAATTTATGTAAGGTGTAGA  
AACTAATTTTTTAATTTTACCTTCTTAATATTATGGTGGTTCATTTTACTTTGACGTTGATTTCTCAT  
TGAACATCCTATCAACTATTCTGCTATTTAGTTTACCTGATAACATTGCATTGGAGGGTTCAATT  
GATGAAAACCTTAGGGTTCAAATACTTCGCCATTTCTGTTT GCCCTTTATATAACTTGCATGCACGT  
AGAGATCACGTTGGGTGTCAATATTGGTAAAGAAATCAGAGGTTAATAGAAATCATGTTTCGCTA  
TGGTGTTC AAGGCCCATGTAAGAGGTCACCAGGTCAGAAAGCAGTATAAACCAATCATTTGGTC  
CGTGGGAATCCTGGAAAAGGTCATATTACGCTGGAGACGCAAAGGCAGTGGCTTACGTGGATTT  
CGACCGGCTGCCCTGAACAAGTCCCTGAACAACCAAGCGAATCTCCGAAAGAGGATGACTATG  
ATTATCTCAAGGAAGGAAGGAAGCAGAGTGAAGTAAAGTTCAAAAAGGCCCTTTCACGGGTGA  
AGTCCATGGTTCAGTATCCAGAGGCACGGGCTCAATACCGGCGGGTGCTAAATGTAGTTGAGGA  
CTTCCGTCAAACCAAGGTATTTTGATTTGATTGTCTAACTTATGTCTTGTCTACTTATAAACTCAT  
GATGGATACTTGGTTAATGATATGTTCTTTTGATGTCCTACCAGGGAGGTAATTTGAATTTGATA  
AATTCGGAAGAGACAGTTGATGGTGTGGAGATTTGATTGATATTGACATGCTTTTAGATGATGA  
AAATTTCTTACCTATAGCATTGATTGATTCTCTGCTGTTGCTCCACCCACCCCGGTAAATAGAT  
GGCCAGTTGGTTTTATTTGGCATTGGAGAGATCCTAACATGGTGTGCTGCTGTATATATATTTATA  
TTTATATATAATATACAATCAGAACTACTTGGATCATAGGCTTCTCTGTTTTCAAGCAAAAAACTA  
ATTAGATCCAAGGGTGGTTTTATAAATAGATTATGAAACCTAGAATGCGTTAAGGTTTGATAGTT  
CAAATACATGATAGACATGGTTAATTTTATATATGATGATTTGTATATGACATGATTATTTTTATT  
TAGATCGAAATATGCTTTTAATTCTTAAATTTGTATCATTTTTT

>Glyma.08G178900 (GmCAMTA6)

AAAAAGTTCATTCTATCAGTTTTTCACTTTATCGCGTCAGTTGAGACTTGAGAAACAGTCCAGGA  
GAGAAAAAAAAGGATAAAAAGAAAAGTCTCTGTCTCCTTCGTCGTTCCGCGTTGATCTCAGATT  
AGTCTTCGCCATGGCGGAGGGTGCTTCTTACGGATTGCGTCGTT CATTAGGTCAATTTCTAATTATT  
TTTTTTCTTTTGCTTCATAATTTCTCATTCAATGCTTCGATCCTGCGAATTTAATTGTTTTTTTTCGAC  
GCGATTTCTTGTTCATGGTGTTCAGCTATTGAATTCGTTTCTTTCGTTTAGTGGGTTCCGTGTTG  
GGACTTAGTTTCAGTTACTAATGATGACTTCGCTAATGAATGGACCTAACGTTCCGGTCCCTACTGA  
GGTTGACAAAAATTGTGCCCAATTGATTTGGGGGAAATAACTATTTAGGGATATTTTTTAGTCCA  
ATTATGTTTAAAGTGTCTTTGGCACTAGGTTTGAACGACATGAACCATTGATAGGTACTGCTTCAC  
TGCATCAGTTTTCCACTTGTTCGGGTTCTGAGTGGTGAAACTTTTTTTTTTTATCGGCAAAATGTT  
AATTGTTGGTTTTTTGTTAGTTGAGGGAATCAAACCCACAACCTTCCCTCCCTTCTCCTTTTACCA  
CCAAACCAACCTTATAACTTCTCTTTGTGGTGAACTAACTAAGATGCAGCTCCAATCCCCCA  
AAGGAACTAAAGCTAGTATTGTCAAATTTGTAACAATTTCAAACGATTTAGTTGGATGTAGAAA  
GCACCATGCATTTGAGGGATTTTCTTGCAGAGAAAACTGAAAGAAGCATCAATTTTATGAAA  
GTTAGATTTATTCATGGAGACAAAATTAAGGATATCATTTTTCAAATTTTTATGAATCCTATTCT  
TATTGGTGCAAAATGTA AAAAGAAAAGTTTTGATTCAGATAAGTGGTATTTGATAATGTCTGACAT  
GAATGTATGTTGAGCCCTGGTATGGTAAGGTAAGGCTGCTGTTTCAACTGTTCTTGCTTCTTTTAT  
GGTATGCAAAGAAGTTTTGAACTTTAAATGAAGATTCATTGGGGAAAGAAAAAATGAATTTAAGG  
ATACATTGCTTCAAATTATAACATAGATAGTGGCCATGTCGGTAAATTAGTTCTATAAATAAAGA  
GATCTGATGGCTAAAAGAAGAGCCAGTGAATCAACAATTTTCATTCAGACAAAAATAGTGA  
GTAGATTTTCATTTGTTCTCTTAAATGGTGAAGTTGCTATCATGAACCTCTAGCCTGTATTTACTT  
CAAACCTACACATAGCCATCAAAGTGAAAGTTAAACTGAAGGTTTGTAGCTGACATGTGATTTA  
ATTTTTGAAGCAAGCCAATACCTCCTTTCAGGATATGATGTTACACCTTAACTTGTGGTGTTTTC  
TTGAGTTGTACATATTTATCATAACAGATGATTGACATATTATTTTTTTGAGTTAGATAGAAAATG  
GTTGGCGGGTTCTGGCCATACCTGCAAACAATCATTAGCTGGATCAGAGAAGAGGATGTAGTGA

TTTGGGTATTATGGGGCGCCTAATTTCTACATTGAGTAGTATAAGATGCTCAGTGAAGGACTTAA  
GTGCCTTGGTTCTCCCCCCCCCCCCCTTGGTTGCTAGCTTTGAAGCGTGGGTTCTCTAAGTGTTTG  
GATGCTTATCATGTAGTGTCTGCTTGTATTTCAATTAGTTTTACTCAAACCAAATTTGTCAAATTTG  
CGTTAAAGATTGCAGGATTGCATGATCCTATGATTTTCATGCGTGCATGATTGGTTGCAGGGTTGT  
TTTACTGCAAGATACTTTTGAATTGCAATTTTCCTGGTCCAAGATTCCACAATCTGTGGCATCTCC  
ATCTTCCTCTGGATCAGGTTTTGAAATGAATCCCATTTACTGGACCTGACGCATTTTCAGATGCCCT  
CTCTTATTGCTCTCTGATTTTCAGTCTCTCACACTCTCAGACTCTTGCTTGCTTCACCTCATCTCAGT  
CTTGCTCTTGTGGTTGCTTTGTCACTGCCATATTACGCTGGTGTCTTCTTCTTCTTGCTTCTTCTGCTG  
TGCTTGGCTCTTGTGTCTTACCTCTGTGTTGATTACAAGCATATTCTTCTGCGGTTCTGCCTCTCTC  
ATTCTCTGTATAACAATTAATATAGTTATCAAGAATCCCTAAAATTGTAGTCACTTTGACTGTGCAG  
TATTTATTTAACTTATAATAACAGGGTATCTATAGATCACCTTAACAAAATCAGTATTTGTCAA  
GTTATCCTGTGTACATAACACGTACATTATGTAGGTTAATATGAACATAAGGGAAGCTATCTATA  
TAAATCTATGAATATATATTTTTCAGTTTAAAGTTTAGTTCAAAGATATCATTTACAAGATATTTTCT  
TATCCATCCTTTTTATCACATGTATATCTTCATATATAAATTTGCCCTTTTTGGTAGGATCTTTCGAT  
TTATGATCTTTCATCCCCCTCCTGATCTCGTGTAAGATCTTGATTTTGACAACATTGCTCAAACA  
ACTTTTCAGACAAAACTCCACAACATTTTGATTTTAAACTAATTTTAAACACAAGCTCTTCCACAT  
AATCACATAAAAAGACTAAAATCAAATGATTCTGTTGAAAGGAGTATATTTAGTAGATAAATT  
GATTTTGGAGGGGACTAATAGGCTGCTAAGTTTATGTACTGGATACTTTGACCTCAATATTGGACT  
CATGATTGACAATGTGGGTGTTCTTTTCATGTCACTTTATCTTCTCTTTTTGATTCTATAACAAAA  
ATATTCTTATTGATGCATGTGACTTTTGTGGCCATGATTTGATTATTTAAGCTTGCTTGAATAATTG  
CGTATTTGTGTATGTGATATAATTCAAAAATCAAATATTTAACTGAATGCCTTATATCAATGTGCA  
GATATTCAGCAATTACAATTTGAAGCCCAGCATCGATGGTTGCGACCTGCAGAAATTTGTGAAAT  
TCTTCGTAATTATCGGATGTTTCATATCACATCAGAGCCTCATAACAGGCCACCAAGTATGGTTAC  
TGCATGTTACTGATAAATTAATTGGCACCTGTATATACTATTATATAATTTTTTACATGTATGCATT  
GGATGAATTGTTCAAGAAGCTTACACCAATACTGATTTTCAATGATGTGTTTGTGCAACTGGTA  
TAAATGAACTTTTTGGCCGAAACTATTAACATCTTCTAGGTGCCTAACAAATGTGTTTCAACATGG  
GAGTATTGCCCTCCTTGGGTTCACTTAGCTGAATTTAATTCCTTTTAAAGATGTATCAAGCATTTTA  
ATTTTGCTTATCTGAACTTAAGGTATTCATGTTCCAATAGATCCTATATATTCAGTTCAAGGAAT  
ACATGCACATTGGGTAATTCAGTAAATATTTTTTCATGAAGTTTGGTAGCAAAAAAGCTCCTGAT  
ATGCCTATTGAATTAACCTTTGCAATTCAGTAGTTTAAATGATATTATTAATAGTATTTTGTGTTTTG  
CTAAAATCTTGTGTTGTTGTTAACTTCAATCCATCTTTAGCTCCTAATTGTATTCTATCATTACTT  
CATGCTTACTAAGACCTCACTTAATGACTTGTATTTTCATGATTTTCAGGTGGTTCACTTTTTCTTTTTG  
ATCGAAAAGTTTTGAGATACTTTAGAAAAGGATGGGCATAAATTGGAGAAAGAAAAAGGATGGAA  
AACTGTGAAAGAAGCTCATGAAAAGTTGAAGGTAAGCTTATAATTTGCTTCACTTTTGTGTTTTG  
TAGTTAATCAAATTTTTGTAAGACTAGCATATATATAGGATGATTGGATATTTTTTTTTCCAATTGG  
AAAGCAAGTCTTTATACCATTATGCAATTATTCCTGGAGTTGTAACATCATTAAAGCAAATTTAG  
ATTGGAAGTGTGATGTGTTGCACTGCTACTATGCCCATGGAGAAGAAAATGAAAATTTTCAAAG  
GCGAAGCTACTGGATGCTTGAACCGTGAGTATGAATTTACATACAAGATTGTGTAATATGCCTTG  
GAAATTAAGTACATTCATATTTTCATGTGTTTGTGCTTTGTAAGTTTCTTAGCAAGTACTGCATTG  
GTGCATTTGCTGTCATATCTCATGTAAATGTACATATAACAAGTTTTTAAAGGTTGTTCTTTACCCTCA  
AACTTAGTGAATAGAGCTACATTTTTGGCTTTTTCTTTGGTGTGTTGCATGTCGATTGAGAAGCTCTAC  
TGCATTCTTCTCCCTGTTCTCCTTTGTTTTAATGTTTTTGAAGATTTCTTATCCTATCCGTAGTTG  
TTACCCACTAATCCACTTATTTCTCCCTAATATAAATTCCTTTTTATCTAATAAGTTATAACAGTTTT  
TAATGTTATTGGGTTGCAAATATTTTGTGCTCATCTTAGCTAATTTGAGTTTTCAATGTACATCTACT  
TAAATATTTTTTGTCTTCTTACAATTAATCAGAATATGGTTTTCTTTATTGCAGGGATATGATGCA  
CATAGTATTTGTCCATTAATTTGGAAGTTAAGGTATTTTGTCTATTTGTTTATTTTTTGTCTGTTATTA  
CACTTTCTTGTATTACCAATGGTTGTGTTTTTATCAATTACAAGTTATAACTTTATTTCTGCAGTGT  
TATGAGTCAAGAGTTGCACCTCTGCCAACATCTTAAGCTTTTGGCATGGTGATAAAAAGCACTCTT

GGTCATATCATACCATCCTTTTTTAAAAGATCTTGAAATCTATTTCTATCATATTCTTGTTGCGATC  
AAGCATAAAGAATTTGAAGCTGTTCAATGTAGAAGAATATGTGTTTTGTAGTTCTGATCTTGATTG  
ACTTGAGTGCATGGGTGACTTATTCATATATTTCTTCTGGCTTTTTATTTCTCAGGGTAACAAAAAT  
ATTGTAGTAAATACTGAAGGTGATGAGATCCCATCAGATTCCCAAAGGTAACCTTCTTCATCGTC  
TAGCCTTCCCACACATCATAGCAGTGTTCTTCTCTGAGTACAGATTCCGTGAGCCCAACAACCA  
GTTTGATGCTTTACGTGAAGATGCTGATTCTGGTAATTCTGCTTAAATTTATTTTACAAGGGTTCA  
AAATTTTTATGGTCTGTGAAGTGAATTATATGCTAAGGGCCTGTTTGGATTAGTTTCTCATAAAC  
AATTTTAGGAGAAGAAAATAAGAAGGAAAAATGAAACGAGCTTTTCCATAAGCTAAAATTAGAT  
TATGTATAAGTTAATTTGTAGAAGCTCTCTCATATTAAGTTTCTCTAAAAGATGATTTTTAACTTATG  
CATAAGCTAATTTAAGCTTATGGAGAACTTATTTCATTTTTCTTCTCCTATAAGTGTTTATGGAGA  
AGTTTATTGGAACATGCCCAAGTCTTTAACTATCTTGGTGTACTGTTACAACAAATATTTGTGTA  
ATAGTTTGGCATTGGCCATTGATCACTCTTAAATGATTTAATCATAATTCTTTCCAGAGGATAT  
CCACCAAGCAAGTTCTGGGTTGCGCCATTATATGAGTCACAACATAGTGGGAATGGTCCATTGA  
CGGAAAAGATTGGTGCTGGTTCGAACAGTTCATATCTTATTCATCCCTTTTCAGGTTACCTTCCCT  
CCTTTTTCTTCAATTTTGTGTCTCACATGTATATTATAACTTCTATTAGGCAACCTTTGACATGTGT  
TTCCCCCATATATATATATATATATATATATATATCTTAAAATATTTTTAGGTGATTATGAACAG  
TCATCAATTTCTGGAACGGATTATATCCCTGTTGTTTCATGGGGATAAATTTAGAGGAAATGATACT  
GCTTATATTGATGGTCAGAAAACACATGACGTGGCAACATGGAGCACTGTCTTGCAAAGCACTG  
CCAAATTGCATAATGATCCTTCTTGCATCATCTCCTTCCATTCCATCTAGTTCAATGGGAGATGT  
CCTTGAACAAGAACATACCATTTTTAGTGACCTTTTAAATGAGCAAAAGTGGTCTCACTGAGGTAG  
CAGAGAGCTCTCAGTCTCTCCAATCAAATTGGCAGGTACATACTGTTACCGCATAGTATATCTAT  
CAGTAGAATTATCTCACATATACGGCTATTATTTTTGAGGATGGAAAAGACATAATTTGACAGTT  
TTATGGGACTAAAGCTTGTGCACACTTGAAGTCTATTTTCATTAATAATTTTAGTTTAACTTAATG  
ATGAATATATTAAGTATCTGGTGTCTGGGCTGCATTTGTCATATTAAGGTTTTGAATTGTTTCTG  
AAAGTCTAGAAATGCTATTGTTGGGAAAACCCAAGTCCGGCATAGAGATAGTGTCAAGATAGA  
GTATATAAGTGGGGGTAAGTCTCACCTTATAAGCCGATTTTGTAGGGTTGAGTTAAAACCAAAC  
CCAAATTCTAAGAGCCATAATTCCAGATTACAATTTTTTTAGTAACTCGAACTTTCTCCAGATGTA  
TCCGTATCCAATCTTTTTGTTGAGATAGGTATTTATTTGCTTGAAGTCTTCGTAATAACTTGTGG  
GTAACCATGACTGGGTGTTGGTTTTTATAATATTTTTAATTTGTTGGCTTTAAAAAAATGACTGG  
GGGTTGGCTGGTGTCAATTGTATTTTTGATTGCTTAAATTTGAAACTGATACTTTAACTTTGGTTT  
CTCTTATATGTAATTTCAAAGTACTACTACTAATGAGATTTTGCTGAAAAATATAACTATTTATTTT  
TTTATTTAATTTGACTCAGATTCCTTTTGAAGACAATTCAGGAGGCATGCCAATGTTAACCCAAAC  
CCAGACATTTGGTCTGCAATTTAGATCTGATTATGGCACCGGTTTACTAGGGAATGAAACTCGTA  
ATGCATGTTCTGAAAGTGTGCGATCCTGTACAGTTTTAATGGTGAACCAAAAGAGCAGCCTATG  
CAGCAAACTATCTACAAGAGCTTGAAGATGGACAATCTCAACATGCACTAAAATCCAATTCTG  
CAAATAAAGTTCCTGATGAAGAACTATCAACTATGGCTTAAACAGTGAAGCGCACATTATTGGA  
CAAAGACGAGAGCCTGAAGAAGGTTGATAGCTTCTCTCGGTGGATTACTAAGGAACTTGGAGAG  
GTGGCTGATTTGAATATGCAGTCTCACCTGGTATTTTCATGGAGTACAGATGAATGCCAGCATGT  
GATAGATGATACCTCATTGAGCCCATCTCTCTCAAGATCAACTGTTTAGTATAAATGATTTTTC  
ACCTAAATGGGCTTATGCTGAGTCCGAAATTGAGGTAAGTCTTGTGGAAAATCTATATTATTAT  
TATTGTTGTTGTTAAAAAATGTCAGATTCCATTACAATCGAAAAAATAATTTTTTTCTGCCAACTG  
TTTACTGGTTCTGTGGTCTCCTTTTCTCCCTCCTATTAGTTATTATATGAATAAGTACTTAATATGT  
ATACATGTCATTTTCATTGACCATAAGAAGTCTTTTCTTTTCTCCTCAAATATCAAATGCTTGTCTTA  
GTCAGATATTTGCAGTTTTTGTCTTAAATTTTTAATTTGTAATGCCCTCCATTTTGATTTATTTTGT  
TATTTCTTCTGCATCTTGGTATTTTATAACACATCTGACACTCTTCTTCTTTTCCCCTCTCCTTTT  
GTATGTTATATATGATTAATGGTTTTACTTCTTTTTCTAGTTGAGATTGAGTCTATTGCAAGATAAA  
ATGAAGAAGAATAGGATGTAGTTTATTGACATCTTATCCTGTTCAAAGTATAACAGGTGTTGAT  
TATTGGATCATTTTTGAAGAGTCAACCAGAGGTGACAACCTGCAACTGGTCTGTATGTTTGGGG

AAGTTGAGATTCCCGCCAAGGTCTTAGCTGATGGAATTTTGTGCTGTCAAGCTCCGCGTCATAAG  
GTTGGACGGGTCCCTTTCTATGTGACATGTTCCAATAGGTTAGCTTGTAGTGAAGTGCGGGAATTC  
GATTCAGAGAGGGCTTTGCCAGAAATGTAGATTTTGCAGATTTTTATAACAGTTCTGAAATTCTG  
CTTCATTTGCGACTAGAGGATTTTCTTTCTTTAAAGCCAGTGGACCCTTCAAATCATTCTTTTGAGG  
GTGATATGGAGAAAAGAACTTGATTTTTCAGCTCATTTCACTGAGAGAGGTGGAGGAATATTCA  
ATTAAGGATGAAGTACTACAGAATTGGATATATCCCAACACATGGTGAAGGAGCATCTGTTTC  
ACAAGCAGTTTAAAGAGAAGCTGTACTCATGGCTTCTTCACAAAGTAACTGAGAGTGGTAAAGG  
GCCAAATGTATTAGATGAGGATGGGCAAGGTGTGCTACATTTAGCAGCTTTTCTTGGCTATGATT  
GGGCCATAAATCCAATTATATCTGCTGGAGTTAATATCAACTTCCGAGATGTGAATGGATGGACA  
GCTCTTCATTGGGCTGCATCCTGTGGCAGGTAAGGTTTCTTGAGATTTTTTCTCTTTATTGAGTA  
CAGTTTGTGAACATAAGTTATGTCTGTTAATCTTGTGTAACCTTCATTTACCGCAACATATGAAA  
CAAATCTAAGTTTCTTTCTTTAAAGTGTGGTTAAGAAATATCCAGTGTTTTAGATGAATGGACTTG  
TTCCCTCCTCTCCCTCCCTAAATTTAGATTGTTTTAGTTCTAAACGTTGCTTCAGTTTTTATTGT  
GTGTGTAATAAGTAAATTAGCTAACTTAGAGTTATCCCTAGAGCAATTGCTTGGTTAGTCAAA  
GGCAAATCACAATCTGCTTTCAGCATTGACTTTCTCAAATATATTATGTTTCAGCATAACATGATTT  
TTTTTCTTGTATTCTTTGTCCTTTTATCAGAGAGCGCACAGTTGCTGTCCTTGTCTCCATGGGTGCA  
GATTGTGGAGCATTGACAGATCCATCTCCCTCATCTCCAGCAGGTAGAACAGCTGCAGATCTTGC  
CTCTAGCTATGGGCACAAAGGAATTTCTGGTTTTCTTGCCGAGTCTTCATTAACTCACCACTCGA  
AACCTCACAATGGATGATCAAAAAGGTGGTCGGCAAGAAATTCAGGAATGAAAGCGGTGCA  
GACAGTTTCAGAACGATCTGCAACACCCGTGCACTTTGGTGATATGCCAGATCTCTGCCTCAAGG  
ATTCGTTACTGCTGTGCGTAATGCAACACAAGCTGCTGATCGTATACATCAAGTATACAGAATG  
CAGTCATTCCAGAGGAAGCAGTTAACTCAGTATGAAAGTGATGAGCTTGGATTGTCAGATCAGC  
AAGCACTTCCCTTCTAGCTTCCAGAGCATGCAAATCTGGACAAGGAGATGGTTTAGCCAATGCT  
GCTGCAGTACAGATACAGAAAAAGTTTCGTGGTTGGAAGAAGAGACAAGAATTCTTGATGATTC  
GTCAAAGAGTTGTTAAAATCCAGCTACGTTGATCTGCTCTTTTTACTTGATTTTTTCATTTTCATTATT  
CTGGACTTTTTTTAAGTAAACATGTATATTGTTAGATGGTCTTAATTTTTTCATCAAATCATCTTAC  
TAATTATTCTGCTATTTTTGAAATTAAGGTGGAGAATTGATTGCATTGAAGATTTTGATTGATAA  
AACTCTGGATAAGAATGGAAAAATGCTTCTTAACTTTTGCATCTCTTTGCTCCTACTATAACTA  
GTGTATACATGTGGATCACACATTGGGATTGTCAAAAACAAAACTGGAGAAAACAATCCAGAA  
TGTGAGGAAAGCATGCAGTAAAATGTTCTTTATATTGGGTTCTTCCCTCCATCATTCCATGCATTT  
ACTTAGTGATTTGGTGTTGTGTTAACATTCATCATATCATGAGCTTGCGCACCTAGTGGGCCTTAA  
AAGCATTTAACTCCCAAGAAAGTACACCAAAAGATATCATATATAGCACTTGTGCTAAAAGT  
CCTTCCTTATCCTCCTGCCACGACCTGTAAAGTAGAAAATTCAATTTGAGGACACAACCTTATATTC  
ACAAAAAATTAAGAAAAAAGATTTAGGAAGCTACCAGAAAAGATACAGTGACTTCCCAAAGC  
TTAAGTTCAATTATCTCTGGCCTGAGTCTTTAAGACTTAAGTGTGAAGTTGATGTTTGCCAAGC  
AACTTTACCCTTCCCTACTTTGCTACTTGTACCTCCAATGTAACCTCCACCTGGCTCCCTTTCCCA  
AAAAGAAAATATGACTACTTCAGAGATTTTCTGCTTTTTTTTTTTGGTTTTTTTTTCTATCTTTTATT  
TTTTTTTTGTGTCCCTATGCACTTGGCACATGCTTCCACTGACTGTTGAAATCTGTGGTGTCAAGGC  
CCATGTAAGAGGTCACCAAGTAAGGAAACAGTATAAACCAATCATCTGGTCTGTGGGAATCCTG  
GAGAAGATCATATTACGTTGGAGGCGCAAGGGTAGTGGTTTACGTGGATTTTCGACCAAATGTCAT  
TAATGAAGTCCCCGATCAACAAAATAATTCTCTGAAAGAGGATGATTATGATTATCTCAAGGAG  
GGACGGAAACAAAAGGAAGAAAAGATCCAAAAGGCCCTATCAAGGGTGAAGTCCATGGCTCAG  
TATCCAGAGGCACGTGCTCAATACCGGCGTCTGCTAAATGTTGTTGAGGACTTCCGTCAAACCAA  
GGATTTGTAAACATCTGGCAGGTGTCTAAACACTTTAATGTTTGGCTTAATGATATGCTCATAGT  
TGTTTGATATCTGGCAGGCATCTAACGAGGGTTTGTATCAATTCTGAAGAGACAGTTGATGGTATG  
GAGGATTTGATTGATATTGATATGCTTTTAGACGATGATAATTTCAATCCTATAGCATTGATTGAT  
CCTGCAATGGCTACTCTCATCGTCCCCACTGTAATAACATGGCCTGTTTTTGGCTTTATTGGTATT  
GGGGAGTCCTAACATCATCTTGATGTAGTATATATTTCTAATCAAATAACTTGGATCCAAGGCTG

CATATAAATAGATTATGATAGCTAGAATGCACTCTGATTTGACAGTTCAGGTATTGTAGTCTAATG  
CAACATGGTTTGATTTTATTTATGATTATTTTAGTATGACTGTTTATAGATGATTGTTTTTTTTGTTTT  
GATAGGCAGACGGTTGGGGTTATAACATAATGATGTAACCTGCTAAAGTATTAAGCTGCAAGTT  
GTACAAAAGTCGACTGTGGCGAGAGAACTATATACTAAGTGCTAATTATGATATCAAGCTTGTT  
TTATCGTTTGCATTTAAATTCCTTTTTTATCAGTTAGTTCTACTTCTGCAACTTGTCTTTTTAGTTAT  
AGCATCCCCATTTTTCTTAAAAGGATTTCCACTCTGCATTGTAGATGATATAGGTTGGTTTGCTT  
TGGTTATCTTCTCATTCTTATCACTTCATGGTTTGAATGTATTGAGTTTTTGTGTTATCATCAC  
ATTTTTTTTTCTTGACAAATGTTAATCGTTAGTTTTTGTAAATGAGA

>Glyma.17G038800 (GmCAMTA7)

AACCCGCGTACTATCGTGGACATGCTTTGGCTTACATCGTAAGAAACAAGTGCCACGTCGGACAT  
GTGTGAACGCTACGTGTTGGGCTTTGACTTCAACTCTCTCTTTTCTTTAAGTACCTTTCACGCGCCA  
CCGTTGCTCTCCGTCCCTGTCTTGTCCCTCTCTTTTCTTTTCATTATTATTCCTTCATTTCTATTTCCCT  
CAACACTCTTTCATTTCCCTCTTACTCTGTTTTGGCCTTTTCTTTCATCGCTTTCATCCAATTCAATT  
CAATTCTCTGCACTGGCTTTTTGAAATTTCCATGTGTGAGCGAGAGATTATTGCTATGTTGTAATC  
ATGGCTGAGACCACAAAATACATTCCCAACTCACAATTAGGTTAGAGATTCCCCTTTTTTCAATTT  
TCGTCGTTATCATCATCATCCTTGTGCTTTTTTAATTTACATTTTTCTTAGTAGTTTCTGTTGCAAT  
CATTTCAATTCTCTCTGCATGCATGCATGTGTTACTGTCTGTGCGATGGGATCACTTTTATTTCAAGTAT  
TCCTGGTCAAATGGGATGTCATTTTCTTCTCCCTTTGTTTACATGTTTTCAATTGCTTAACTTGG  
TTGGATCACTGATCACAATTGGGAATTTTCGACTTTGATGTGAGATATAGTTAGCCATGTCACACT  
TGAATTAATTCATGCATTGCCTGCGCATTATTGTATACTTATTTAACTTTGGTACCATTGTTGCC  
TTCATTGAATATAAGTATAACTTCATGAATCAAACAGAGTAATGTATTTTGTGTTAGTTTGATTTTT  
TTCCCATGTCTAGTATAATACCCTTTGAATCTTTGAATGTTTCTGTTACGTAATAGAGCTTGAA  
GAGATATTGAATGAAGCAGAACATCGATGGCTTCGACCTGCTGAAATATGTGAGATACTTCGCA  
ATCATAAGAAGTTTAAATTAACACCAGATCCACCTGTTATGCCTCCAGGTATTTCCATTTTTCCC  
TGAACCTTCATGCCCCCTTGTATTTTATATTTGCTACAGTCAAGGAAGGGGAGGGAATGCATTTTA  
CCTCATTCCGGGGCTTGAATAACCGATTCAGTGGGTGACCAATGGGGTAACAAGCTAACACCAGG  
GAGATAGAAGGGTGAAGGGAGAAGGGAGGGAGGAGGTCACGGTTTCGAATCCCCCAGCTGA  
CAATTCTAACAAATCTAACAACTAATATTTGTGATGAACAGAAAAAAAAAAAAAAAAAAGCT  
CACACCACGTGGTCCTTTGATTCCTTTATCAAAGGGCACTTCATTGTTGCTGTCATGATAATCTAA  
AACATGAAACAATTGTCATGCACTCATGCTTTATAATTTAGAATTTCTTGTTTTTGTTTTTCATTGA  
GCATTTGAGATGGAGAACTAACTGATAATGGTGATAATAGAACTCAGTTAGCTAAGTTAGCTTC  
ACCAACGCACCAAAGGAAAGACCTTGATCGTTATATATGTTTTGCCTGCTACGAGGATGGAGTGT  
TAATTTTGACATCAAATTGTTATTCCTTTTTACCAGCTGGATCACTATTCTTGTGTTGATCGAAAAGC  
ACTTCGTTACTTTTCGAAGGATGGTCACCGGTGGAGGAAGAAAAAGATGGGAAGACTGTAAGA  
GAAGCTCATGAAAAGTTGAAGGTGTGCTGTTTATTAGTTGTAAGTTTACCTTTTAGAATT  
GTTATTTAATTGAACCTCTTGCATGTTTCAAATTGTTGAGTTGCAACTTTGGAATAGCCTCATGAA  
ATTAGTCACCTTTAGATTCCTATTGTTTAAACATAACAATACCATGGCAATGCATTAGGAGACACCTC  
TGGTTACATAAGTGTGTAGCTTCATGGATGGTCCTGAAATTCATGGCTTGTTTAACTATTTTTGTGA  
ATGTGATCATTAAATATATGAAGCACAAGAAGCTTGATACTAAGGAGGATGTCCTTCTTTAAGTG  
TTCAATTATTAACCTTAATTTGAATCCATGGATTATAATTTTCAATATAATTTACTGTTAATTTAAA  
ATTAATGGAACAACATAAAGTTGTCACACCATTCCTTTTTTTCAGTTCATTATATATTCTTTATTGG  
GACTATTCTATTGTTGTTTTTTTCTTAGCTGGACATATGTTAATAGTGGTTGAGGAATCTCCTAGG  
ATTATGCTAAAGCTAACTAGTTTTTTTTCTTCCAATTTTCAATATCCAATTGGTACTTGCCTTTTTCTT  
GACAGGTAATATTTTCAATCAAATTCATTTATGATTAATATAAGTAACACAATGGATAATAAGCTA  
AGAAATTTTGTAAACAAGCTTGTATGTTGAGATAAAATAGCAAACATTAGAAGTGCTTTGAC  
AATGTTTTGGCTTTATTGTATAAAGCTTATATTTTGGCAATTGTATCAAATGAACATATTAAGTAA

TTGGTATTTTAAAGTGTAGGCTGGTAGTGTGGATGTCTTGCATTGTTACTATGCTCATGGTGAGGA  
TAATGAATACTTCCAACGGAGAAGTTATTGGATGCTTGACGAGTGAGTTTCTGTCATCCTCTTAAT  
TTCAGGTTTTGTAGTTCCTATATTTGATTTTTTTAAGAGGATATTCAGTATGGTGCTATGTTGCTAA  
ATGCTAATGTATTTGGTCAATCTGTAAATTTATATTGAGCAATAATAAATCGAGCTTTAAGTTTGT  
ATTTTGCCTAAAACACTGAAAATAATGTTTTTCTGATGTAGTTTTTTTTCTTTTGGTTCTTAAGGGGC  
CAATATTAATAAATCCAAGATTGGACCTTGCTAAATAGCAATCTAAACAGTCCAGTTGCAGGGTG  
GATTTATTTTTATAAAAAAATAAATTAATAAATACTGATATATAAAGATTTCTAAATTTCAATAATT  
AAACAAAAAAAATCCATATTTTCATTGATTGATGATGAAAATCCAGCAATATTATAAATATTGAA  
AACCGATGAATAAGATTGCTGTCTGTGGTGAGCTCTTATTTAATGGACTTATTTTTGAAGGTTTG  
GGTCTGCATGAAATTACAGACTGTTCCACTAGTTCGGCCCTTTTTAATGTATTAGCATTGATAAG  
AAAAAAGTGACAACCTGAACATCGTGTGGTTTGCAGGCAGTTAGAGCACATTGTCCTTGTGCA  
TTATCGTGAAATTAAGAGGTATGCATGTGTTCTTCTCTGTTTTTTGAATTTTTTTTTAATATCATAT  
AAAGCTATCTAGATAAGATGCTGCTATATTGTAACCAGAATCCAGTTTATTCTGATTGGTGTTAAG  
CTCATCTATATTTTTTTATGTTATCATTCTTCCAAGCTTGTTATGATGGTGTGCCACTTATGTGGG  
TTGTGACCAATCAGAAAGACTGACTAATGATTGACCTGTCAATGGATTTTCTGATCTTATTGTGAT  
TATTCAAATTTGCAAGTTTTGTGCATTTAAGTGTGTTGTATTATGTATGCTTTACAGGGCTGCAAG  
TCTGGCATCTCACATTTGCCTGTAGTTCAGTAACCCTGGTTGGTAGTTCCTCAAATACTTCAGTG  
CTTTCTCTACCAAATAAATTCACCAATATCTCTAGTTCAGACATCTTTCACATCAAGTGCAAAT  
AAAGTTTATCAGAATGGACGAGCCTCAGAGCATGAGGATGTCAATTCAAAGAATGGTCCTCAAG  
CCTCCTCTCATGCTCAGCCTATCAGCAATTATGTACTTCACAGTGACCTTGGCTTACACATGAAG  
CTGCAGGTAAGTTGTATGAGACTGTAGACGTAGGATTCATTCAAATTAATGATGAATGATTTGAAA  
TTAGGAATAAGCTTGTTATGTTGGTTCTTGTGTGATTAATTTTCACTGCAAGTAGATCCCTAGTGC  
CATTATTGTTTTCTTATGACAAAGCATCAATAATGCAGATTTTAAAATTTATTGTTTTATATGTT  
ACTGATCTTTCATAATGCTCTTTTACAGAATTACTCATTATTATATTATCGGGATTATTTTCATTTTG  
ATAGTTCAAAGTTAATATGCCTTCACTTTATCTTTTTAAAGTAAATTTCAACTATAAAAAATGTTGA  
TTTATTTTAAATTAATCTTGGGATGCAACCATTGTTTTATTTTGTTCGTTATTAGTCAAATGATTTTT  
GTGGCAAAGATAATGCCTATTGTTTTGGTCCTCATTACTCTCACACCTCTAACTATTTTATTTGGT  
CCATGGAGAATAGCAGTTTTCTTTGAATTTTTAACATGTGATTTTTTTTTAATGATTTAGGGTTTTCT  
GAGTTGTTAAGGAACCCCTTGATTTTCATCATGGCCATCTTCTTTCCCTAGCTACTCTCCTGGTACTG  
GCTTGTCTCCCTGGACCTCAATTCAGAACTCTAGCAGAAACACAATTAATATGCATGATGGAAAG  
CATCATGTTGAAGCCTCTGAAGCAGACTTAACTGTTTCGTAAGCTAAGCAATGCTGGGTTAGATTC  
TGTTACCGAATGCAAGATGGTGTAAATTTTTCAGAGATAGGCTCATCACTGACATGTGCGTCCAGC  
CAGTTATAGATTTGCCTACTGTTAATCAGGTGTAGTAATTGTGATTATCAATAATTTTTAACTTTG  
ACTGCAACATCTCTACTTTCTTTATCATTCTGTCATTATTTTATAGCCTCAAAGTTTGGGTAGATT  
TGTGCTTCTGTGTCTGAAACAGAAAACCTAAACAGTCCAAGTGATCATTAGCTTTGTCAATGCATT  
TGATATGCAAGTTAACAACATAATGTATTTTATGTTCTTTAGGTCTATGTTGTGCCTGACTTTTCATG  
CATAATAATATGACTAGCTGAAATCCTGTAGGCTTCTGGATGTTACTAATGCAATCTCGTTCCTGT  
GTGTTTTTATATAGTTTACTAGCATGCTCATTACCAATGTGACATTTTTTTTTAATTATATTGTGGC  
AGGTGAAAAACGAGCATGGTCTGGATTCATTTTCATGCTCAAGTCCATGATCATAATGATCATCCA  
GTTGTTGCAACTACTAAAATCCTAGTTGAACAAAAACTTCAAGATGGTGGTTTATACAATGATGA  
ATCAGAACAAAGTTGAATATGGAGAAATGAAGAACTTGATAGTTTTGGAAGGTGGATGGATAAG  
GAAATTTGGTGGAGACTGTGATAATTCCTTGATGGCTTCAGATTCTGGTAATTATTGGAGCACACTT  
GATGCTCATAGTGAGGATAAGGAGGTATCTAGTTTACGCCACATGCAGTTGGATGTGGATTCATT  
AGGTCCTTCTTTTCCAAGAACAACCTATTTAGTATCCATGACTTTTCTCCTGATTGGGCATATACT  
GGAGTTAGAACAAGGTGTGTGCCTTTTCATGCACATGCTTGAATTTTTATGCATTTGTATGTTTA  
TGAATTCACAATATAAAATCTGGTTTTGATTTATTTCTTCTTTTGTGAAAAGGTTTTAATAGTTGG  
CACATTTCTGGGGAGTAAAAAGCCCTCTAGTGAGACCAAATGGGGATGTATGTTTGGTGAAATTG  
AGGTTTCAGCTGAAGTTTTGGCGGATAATGTCATAAGGTGTCAGACTCCTTTGCATTCACCTGGAC

GTGTACCATTCTATATTACCTGCAGTAATAGGTTAGCCTGCAGTGAGGTCAGGGAATTTGAATTTG  
ATGAAAATCCAACCAAATTTTTAGGTCCTGAGGGTATTTAAAATCTCACCAGAAGAAGAGGTACG  
ACTCAAATGCGACTTCTTAAACTAGTAGACTTGGGACCTGACAATAAGTGGTTGAAGTGCTCCG  
TTTCAGAATGCGAAAAATGTAACTCAAGGGAACAATGTATTCCGTGAGAGATGATAGTGGAGT  
ATTTGAAGAACTTTCCAGATTGATGGAATTGGTCATATAAACCATAGAGATATATTATTTTCAGA  
GATTAGTGAGAGACAAGCTTTATGAGTGGTTGATATATAAGGTTTCATGAAGGAGGAAAAGGACC  
ACATGTGTTGGATGATGAAGGACAAGGAGTAATACATTTGGCAGCGGCACTTGGTTATGTGTGGG  
CTATGGCCCCATTAGTTGCAGCTGGTATCAGTCCTAACTTCAGAGACTCTCGTGAAGAACAGGA  
CTTCACTGGGCATCATATTTTTGGGAGGTCAGAACTCTTCATGTTTTTCTGTGCTTGTATCTGGTAT  
TATCAGGGATTTATCTTCAACAAAAATGCATATTGTAATTCCTGTATCTTCTGTCTTTATTTGGTTG  
GTGGATAAATAAAATTATACTCTCAGTGTATTCTATGAATTTTTCTTTCAAACCTTCAACTTTTTT  
TTCATCTATGCCGAAATTTGCATGCCAGTTTCATGTTGTTGGGGATGATTCTCATTGCATATTGT  
CTTTGAGTCCTTAGACTTGAGTTTTATGTGTTCCCTCTCTAATTATTGACTTGCATTTTATGGGCT  
ATATATAGTAATTTTATATAATGAATGTGTATCTATTCTCACTCTGTCTTGTGTTCCCTTCTTCCAGA  
GAAGAACTGTTATTGTGCTAGTTCAGTTAGGTGCAACCCCAGGTGCTGTTGAGGATCCGACATC  
AGCATTTCCTCGAGGACAAACGGCAGCTGATTTAGGTTCAAGTAGAGGACATAAAGGCATTGCT  
GGGTATTTGGCAGAGGCAGATCTGACAAATCAATTATCTGTATTGACTGTCAAGGAAAATGAAA  
CTGGCAACATTGCCACAACAATAGCAGCTAACAGTGCTCTTCAGTCTGTTGAAGATGACTCATCT  
AGTATGACAATGGATGAGCAACATTATCTCAAAGAGTCACTTGCTGTGTTTCAAAAATCAGCTCA  
TGCAGCTGCTTCAATCCTAGCAGCCTTTAGAGCAAGGTCATTCTGTCAGAGACAATTAGCCCAA  
GTAGCAGTGATATTTCTGAAGTACTTGACGTAGTTGCTGATTCTTTGAGCAAGGTACAGAACAAG  
GGTCACCTTGAGGATTATTTACATTTTGCAGCTTTAAAGATTCAAAAAGAGATATCGGGGATGGAA  
AGGAAGAAAGGATTTTTGAAGATACGTGACCCGATTGTA AAAATCCAGGTACATGTGTGCTTAC  
AGTGTATTCCACTACCATCAAATTATGATCATGCCAGACTTCTAGAAGATTTTCATGACAAGTTTA  
ACCATCAGCTTCTGTCTGTTTACCCTAAAATAATTTGTTTTATTCTTTTGGACTTCAATCTATA  
AAAATTTTATATGGTGACTGGAGTTTTTCTTAATATGAGCTTATTGTGATTTCAATTGGCATTTACC  
ATTTGAGTAAACCTCCATTCAAGACCCTGAGATTTTTCTTAATATGTACTGACGGTGTAAAACATTC  
AATCACAACCATTTATATATGTTAAGTTTGTGATTTTTTACAATAAATATCTTAAAAGTAGTTTT  
ACATTACCATTAAACTCTTCATTTTATATCTGCAATGGAGACAATATTACATCTTCATTTAATTGA  
ATTGTTCTATATAGGCTCATATTAGAGGACACCAAGTTCGTAAGCAGTACAAAAAAGTTGTGTGG  
TCTGTTAGCATTGTGGAAAAAGCAATCCTGCGCTGGAGACGGAAAGGGGCTGGTCTGCGAGGAT  
TCCGGGTTGGGCAGCCAGTTGGTGTGTGGTTAAAGATGCCGAGAAAAGTGACGAGTATGAATTT  
CTTAGCATTGGGAGGAGACAAAAATCAGATGATGTAAAGAAAGCTCTAGATAGAGTCAAGTCCA  
TGGTTCGTAACCCAGAGGCAAGGGATCAGTATATGAGGCTCATCATGAAATATGAAAAGTTTAA  
GGTACTCATTATTTATTTCTTTTGTGGGCCATGTTTTTTATGCCATTGTGGTGCACAGATGGCTTT  
CAAGTTTTGGTTGATACAGTTTTGGTGAATTGATTA AAAAAGAAGATATAATCAGTTCTTGTTTAT  
TGAAAACAAATCTGATTTGCTAATTTTATTTTGTCTGCTTGTTTTGGCATACTGTTGAACAGATTGAT  
GATGGAGGAAGCAGTCAATCACAGCATGTCGGTTAGATTCTGAAGGAAGGAAAGAGGAATACC  
GATGGAGCTTATTGTTTATACTAAAATCTTACGATATACTTTCTATGTA AATACCATCTAACATAG  
TTTCTAGTTTATATGAGCGTTCAGATACTTTGAAAGGTAGAAGAAAATTCAGAAAAAAAAGAAA  
AGGAAGGGGATGCCTTTTTATTCCCCTTATATTATATCAGTTGAATAGAAGTCAGTTAAGTTTTTTT  
TTTTTTTTTTTTTTGTGAAATAGAAATCAGTTAGTTGATATAATGTAATAATATTGTATAGACTTAAA  
TAAAATGTGGATTTTCGCAGTATATTACTTTTATTTAT

>Glyma.15G143400 (GmCAMTA8)

TTTTATTAAAAAAAGAAAATAATTCGAAAATAGTAAGTGAAGAAAGAAAAGCAACAGAGGA  
GACCTGAGTGACATTATTCAGTTCCGACTTACCGTTTCTTTCTTCCAATCTCCGGAATCAGGTA



AAATTTCTACCTTTTTCTCTCTTCGCATTTGACTTTTGACTTGTTTTTTTTTCTTTTTTTGTTCTCTCTTC  
AGTTCACAAGTATCTGATTCTGTATATTATCTGACTTCTTGCCAAGGTTGTCGGTGCTGCAAT  
TGTTAGTTTTGTGCTAAGAGAAGAAGCTGTTGGGAAAGTTCTTTTTGTTGTGATGATGTCACACAA  
CTTAACGGGGCAGCTTGTGAGTGCAGAGATACATGGCTTTCACACGTTGGAGGGTACTTGCCTTC  
TTCTCTCTTACCTCTCTATTTGGTTTGTGCTCATATTTGGTTGAACCTCAATTTAACTAAGTTTCA  
ATTTTGAGAAGTCCCTCTTGTTTTTTTTTTTTTTTTTTTGGGAGGGGGGATCAAGTTTGAATTGT  
GTGTGAAGTTGTTGTTGGTCTCATGTGTAGCTGGTTTTTGGCTCCTAGAGATGATTGTGTGTGAT  
TTTCAATGCAAGGTTGGAGTGAAGAAAGAAAGTGTGGTTGGTTTTGGTTGTGGATTGTTTCTCCTT  
GATCAAGTGTAACTTCTCTTTGTGTTTTCTTGGAGAAAATAAGGGAATTTGGGGTTTTAAAGATT  
GTTCTGGTATTGGTTGTTGTTAAACTTGATTAAGTTCAAACCTGTTTTGGGAGAAGCAACTAGAAA  
TCATTCTTTGAGAAGTAAATTAAGGTTAAGGGTATTGGTACTGAGGTCAAAGCAGGGTACCATG  
ACAACCCCCAATTTTATTGTGTTGTTTCTTATATTAGATAGACTGTGTGTGGATAAAAATTTCTCG  
ATAAATGCTTATATAGGAGAAGCAAATAAAACACAAAATGAATCAAGCTTCTCCATAAGTTAA  
AATCTACTTAAGCATCTTAGTAAAACCTACTAGTAAAATCATTTCCTGTATTATGCATAAGATTT  
AGTAAATGTTACTTGTAGTATCTTAGACACTTGTGATTGCAAAATATATTGATTTTTGTGAAGTCT  
GCAATATGTTCAAACAAAATGTCGCAGCATGTAGATAGAAGTCTAGAAGGTTAGTGACTTTACAA  
GGATTGATCCCAAGGCTCAGTAAACCAGCTGAGATGTCCAACCTACATATAAATATCGGCTTTTTG  
TTAGGATGTGAAATAGTTCAAGGAAGCAAAAGATTAAAATCTCAAGATGTGAAAGTGTGGCTTT  
AACTTTTGGTTCAATATGGAATAGAAAATTGTACTTTTCAATATGGGGTTTATATTTGCTATGTATT  
TCTTTGCTATTTGCTTCCAAGTGCAGGTATTACTACTACCAATTATGTGGTCAATGGTCAATGC  
ATATTAATCATAACTGCTGATTTGTTTTCTAAAGTAATTTCTTATGTGGCCAGATTTGGATGTTA  
GTAATACTATGGAGGAAGCAAAAAGCAGATGGCTTCGTCCCAATGAGATCCATGCCATACTCTG  
TAATCACAAATATTTCAAGATCAATGTCAAGCCAGTGAATTTGCCCAAAAGTAATCACATGCTGC  
TATTAACAGCAACTTGATGTTGTAATTAGATATGCATTGTCAAATAGATCATTCTCATCAACTT  
TGTTCTCATCTCTTCAACTTCTATTTCTTAATTTCCATGAAACATTTTGATTTTGTGCTTCTGAGC  
ATTTTCAATGTTTTGCAGACGGTATTATTATTGTAACATGTAGATCCTTCAGTTCTTGTGGAAGCATG  
TCTTAACAAAAGTAAAATACATAAAAAGAAGAAAAGTTTTATACACAAATTTATGCATTGTT  
CAAGTTTATATGCTATAAAACCTCTATGATTGATTTCTGGCATTATTCCTTCGTAGATCTATTAAT  
GGAATTTAATTAAGTAATAATTTTGCATCTAACTAACAAATGTTTGAATTATTGAGAATTATA  
TGATGTCCAACAGGATTCCAATCATCAGTGATAATGTTATATTATAATTTGTTTGTAAAACAGGT  
GGTACTATTGTACTATTTGACCGCAAGATGCTTAGGAACTTCAGAAAAGATGGGCACAATTGGA  
AAAAGAAAACCGATGGGAAAAGTGTCAAAGAAGCCCATGAACACTTAAAAGTGAGGATTTTAA  
TTTTTGTGGCGTTTATTTGAAGTTGTGCTAGCAAGTACCCATTGAATGTAGTTTATTGAAGATGT  
ATCTAGGGAGTTTAAATGGTTTGTCTATATTGAATTTGGTCTTCTAATGGTTTTGCCTACTATAGT  
AAAATTGGTCTTTTTTAATAGTCTCTGATGGTTTGTGTCCTTCCCTGATCCTGTTTAAATTGAACTT  
TCAAATAGTTTTACTGAATCTTTGGTTGTTAGAGTGGCCAATGGCATCAGCTGATCAATGTAGA  
GTGTTTTTGGCGAGATGAAGGGAATAAAAATATTGTGACATGAATATGATGGAGTATATCAAGTGG  
CCTCATGAGTATTTGGGTTAAATATTGAAATAAGCCTCTAGAATTGGGTCAGTGGTGAGATGTTG  
GATTGTTTTCATGTGATTATAGGTTTGAATGACCTGCCACCTTGATACTAAAATAGGTTAAATATT  
AAAACACTGGGAGCTTTCTAAAGCTCAGTTATGCATTTTACTAGTTTTATTACACCATCTTTAATT  
CAATGTGCTTTCTTCAATGAGCTGCGAGTGGTAATTTGTTGTTGGACTTCGGAGTTTTGACATTCTG  
TCGATTTAGACATGATTTATGTTAGATTTAGGAGTATTAATTCAGTAATTGGGTAAGTCTAGGTTT  
GTATCACACATTCTCTATGCTTTGTACATCTATAGTTGTAATAATTTAGTTATATTTTATCATTCTT  
TCTTGGTGACATTTGAGGAATAAATTATGTTTTCTCTTCAATCTTGTACCTTATTACACTATATTTT  
CTATTATCAACTTCTCTTCTACAGTTTTTGTATGTGATTCCAATGTTTGATTCTACTATTATTTT  
TCCATCATCAATCAGGTTGGCAATGAAGAAAGGATCCACGTATATTATGCACATGGCCAAGATA  
ACCCAACCTTTGTTCTGATGTTATTGGTTGCTTGATAAGTATGTTTTGCTGGACTTTAGGTTCCC  
AATCCAATATATCATGCATGTCTGTATTTGTGAACTGAGTTAGTAACAAGGGTTATACATTTCTT

GAATTTTTGTTAAACAGAGAATAAAAAATAAGTTTGCTAATAGGAACTTGACTTACTAATGTTATG  
ATTTTATTCAGGAATCTGGAGCACATAGTCCTTGTTCAATTATCGTGACACACAAGAGGTTGTGTTA  
ATCCCTTTCTTTCTTCCTTATTCTCTACAACATTTAACTTCATATCCAAATGATGACTAAGATTTC  
CTATTTGCATGTTGCTTTGCATGATAGAAAAACCTTATATTTTTAGTTTATTGTAGAGATTATGGTG  
AGTTTGTATTGTTGAAATTGTGATAATATTACCGAATATCTTGTAGATCTTGTAATATTCTTTCCCT  
GGTTATGGGAAACCTCTTTGAGCCTTCGTACAAAATTTCTATATATATGATAAAGGCTGGGAGACT  
CTCTCCTAAGGAAGCTTTTCAGTCAAAAAGTTGTTCCCTGTTTCTGTTTCAAGTTGGTAGCAGAGC  
GTACATCAAGTTGGCCTGATCATTGAGTGTCTGATGCGCAGAAATTGTCTATAAGAATAAT  
GTCTCACACCAACCATGTTTTTAAAATGGTCTGGTTGGAAATGAAATTTATTCTCTGCATGAACTT  
CGCTGGTACTAATGCAAGGCATCTCAATAAAGCTCCTCTAAAGGGAATTTGTGTCTAAAGTGAGC  
AAGGGGTGTATCCACCCTTAAATTTTAGTGAGTTAAAATCACACTGTAATTTAAATTAATCAAA  
GGTGGATACACCCTTACTTAGAGGAGCCTTCCATGACTCCCAGTGTGGATATGTGTCTGATA  
GAACTGGACCAGAAAAGGTGAAATTGTTTTATTTCGAATTAGAATGCAGTAATTACACACTCTGAT  
GGATTTGAGGTCTCATCAGCCTCCCATTTCTCTATCACTTTCTGTTCAACCCCTAACTAACCCCTCC  
CACAGCTATTTATAGCCTCTTCTCTAACCACAATTGGTTATAACTAACTAACTAACAGTTATCTTA  
GCTGTCCTACAACACTGACAGCTCTCTAACTCTTCCAAGGGTATTTTCTAACATACACCTTTCCCATC  
TATTTCCCTCTCTATCAGTGTCTTTTATGATTTACCATTTGAACTGGTTATTGAATAAAAATTTGGCT  
CTCTAACCTTTGTTAGGTGGTGGTTTATGCTACAGTTACAATTGCAAGGTTCTCCTGCTACACCCG  
TAAATTCAAATTCAAGTTCTGCCTCTGATCCAGCTGCATCTTGGATTCCATCAGAAGACTTGGATT  
CTGGGGTGAACAGTGCTTATGCTGTTGGTGAGAAATAACTTTTAGATGATTTCACTCTATGTTCTT  
ACAAGTTATATTCTTGAGGCTATCAATATGAAAGGCTTCTTACATTTCTTTTTAATATTGGCATCTT  
ATATTTAGAAGATGGTAAGTGCTTGTAGGGGAAAAAAGCAGGATAATTAGTTAAGATAATTA  
AATAAAAGAACATGTGCAACGTGCATGTCTTTTATACATTGCAAATTTTTATTCTCCGACTCCC  
ACCATTTTTGTCTTAAGCCCATCTTCCAAGGAAACCATAAATAAAAGCCTTTTTATTAGTTGGA  
TATGATCTAATGATCCTATATATATGGTTTCTATTGTTGCTGTCATACATACTGTTGCTATCTTTCT  
TGACTAGGTATATATATCCTCATCCCTTTTTTCTTTTTTTGGAGATAAACAGAGCTTAATGACAATT  
TAACTGCCAAAAGTCATGAGCAGAGGCTTCATGAGATTAATACACTTGAATGGGATGACCTAGT  
GGTTCCAAATGTCAACACTTCTACTACATCTAATGGAGGTAATTGTTTGTCTTTAACAGGACCCT  
TTGCTTGTGGGAAAGAACCTTAATATTTTATATGTTAAATTTACTTTTGCCAGGCAACGTCCCAT  
ATTCATTTCAAGAAAATCAAAGTTACTGAGTGGAAAGATTTGGCAATGTAAGATTATATTGCTTT  
CTTTCATTTGTGTTCTTTATTAAGCTGTGTTGTAATTTTTCATTTATGTTTTGTGGAAGGTTTTAAGG  
GACCATTAGTCCTTTGAATTTCTTTTAGATAGAAAAATAAATTTAATAGGAGAATAAATAAGTAA  
AGCACAGCTATGGGGAGGGTTAGATATCTTTGAAATAAAAAGAGAGGGAAAAGAAAGATTAA  
AGAATGTGGCCTACCAATCTTCGTGTACGGGAAATGAAAACCTCCCTTGAAACAGCCTTGAGAAG  
CATGCCAAAGAAAGGCCAATAACACCAGCATATTCAAAGCACATTTAGGGGTAAAATGCAGGC  
ATCTTTTTCAATCAGACATACCAAAGAGCAAGCTGCACACAGCCAAAAAAGTTTCATCCCCTT  
GTTGTTAGTCCTGTATGAGTTTATGTTATTTTGGCTAATCCTTTTTAAAGTGTATGTAATACTGTCA  
AAAGAGAGTTTATATCATTTATTTATAAAAGTAGATGCTCAAGCATTGAGGATTAAGCATTGCAA  
TTGCATTTGTTTTGTCTCGCTGTTGAAATTATTGTTCTTCTGTTGATTATAGGAAGTTATACACTGTT  
TTTTCTTTCTTTTATTTTTGGCACTTATTACTTGTCTCATGTGTTCTTCTGGGCTAAGACTTAACTC  
AGTTGTACCCATTAATAAGGTCTAGGAACTCGGTATATAATATTTCTTTACACTTATATAAGT  
AAAATGTAAATATATTTTATATATCACTTAAATGGTAGAAAAATCGTTCTTATCAATAGACAAA  
ACATAAAAGGTTATTGTTTATATAGATAAAAATTTGTATCTCTTAAATATATTCTCATGTTCTTCTG  
CTTCTTTCTGTCTTTCTTCTCGTGATACTTGCTTTGTGATAGCTGCTGTTGTAACCTATATAGGGCTT  
TTGTTACCAGGTATCCAGTAATCCTTCAGCAGAAATCCTTCTTTTGGTAATTTAACTCAGCCAGT  
TTCTGGGAGCAATAGTGCCCTTACAGTTTCCAGATAGTGCTATTCTTCTGAAAAATAGTCCTAT  
ATCATCGGGAGGCGTTGACACCTTGGGCACCTTTGGTCAACGAAGGCTTGCAAAGTCAGGACAGC  
TTTGAACGTGGATGAACATCATATCGGATACACCATGTTCCATAGATGAATCAGCTCTTAAAGC

ATCAATTTCTTCTGTTTCATGTACCATATTCATCACTGGTGGCAGATAATCTGCAATCTTCTCTGCCA  
GAACAAGTATTTAATCTCACTGAGGTGTCCCCTACATGGGCATCTTCCACTGAGAAAACAAAGGT  
ATCCTTTTGTTCCTAATATGTCTAATTGCTAGCAATTATTTTCTGTTATAAATTGTATCCTTTAGCACC  
AAATGTAATATTTAGTTTCTTAGTTAAATTCTCTGCGTTTTTCATTCAGTCTTGGACAATATAGTATG  
GCTATGGAATTTCAAAGCTTCGAACTATAAAACCTACAACCTCCACGTGGAGCACACATTGTCAAT  
TTTTGCAATGTAAAAAAATGCATTTTCAGTAGGCATCATTAGCACTCTGGCTACAAGCGCGATC  
AATTCATATGTTTGCTACCATTTTTTCTTTTTGGCAATTATAAGTGAAAATTCAATGTCTCTTTACTT  
CTTGCAGGTCCTGGTAACTGGATATTTTCATAATAACTATGAAAACCTTGCAAAGTCCAACCTAC  
TGTGTGTCTGTGGTGTATGTAAGTGTTCCTGTAGAAATTGTTTCAGGTTGGAGTTTACCGGTGCTGCG  
TACCACCACACTCGCCTGGATTGGTCAATCTCTATTTGAGCTTTGATGGCCATAAGCCCATCAGCC  
AAGTTGTTAATTTTGAGTATCGTACTCCTATTTTGCATGAGCCAACCTGCTTCAATGGAAGAGAAAT  
ACAACCTGGAATGAGTTTCGACTTCAGATGAGGCTTGCTCATTGCTCTTTGCTTCAGACACGAGCC  
TTAACATTTTCTCAAGTAAAGTATCACCGAATGCACTGAAAGAGGCTAGAAGATTTTCTTCAA  
ACATCATATATCTCCAAAAGTTGGCAATACTTGATGAAGTCAATTGATGACAATACAATCCATT  
TTCAAAGTAAAAGATTCCTTGTTGAAACTGCATTGAAAACAAATTAAGGAATGGCTTTTGG  
AACGAATTATCTTAGGCAGAAAGAGTACTGAATATGATGCGCAAGGGCAAGGTGTAATTCATTT  
GTGTGCAATGCTAGGATATAGTTGGGCAATCTCCTTATTTTCTTGGTCGGGCTTGTGCTGGATTT  
CGTGACAAATTTGGATGGACAGCTCTTCATTGGGCAGCATCTTATGGAATGTACGATACATGGAT  
ACTCCACTTGCCCTGAACAATTAGCCTAGCTGCAACCACATTGACCTGAAAATCATTTTGTGACTA  
GTTATAAAAAATAAAAAATAAAAAATCATTTTCTAACTTGATTTCACTGTTCAAGTTCTTTCCAGTT  
TCCTTTCACTAAAGATAAACAGGCAGAGCATGATATATATGATCTTACCATCAAATTTGGCAATA  
TATGATCTTTTCAGTTTCCATATGATACTTTCTTGTGTGCATTTGATTTATTTTTAATCCAGCAACGA  
GCATGAACAACTTTTCATTGTTTATTTGATTTAAAATTTAAAATTTGTGTCTGCAGGGAGAAAAT  
GGTTGCAACTCTGTTGTCTTGTGGGGCAAGGCCAACTTGGTCACAGATCCAACCTCCACAATATC  
CTGGTGGATGTACTGCTGCTGATCTTGCCTATATGAAGGGATGTGATGGCTTAGCTGCTTTCCCTT  
CTGAGAAGTCTCTGGTTGAGCAGTTCAATGAAATGAGTTTGGCTGGAAATATCAGTGGCTCACTG  
GAAACTAGCTCAACTGATCCAGTAAATGCTGAGAACCTTACTGAGGACCAACTGTACGTTAAGG  
AGACTTTGGCAGCTTACCGTATATCTGCCGAGGCTGCAGCACGGATTCAAGCTGCATTTAGGGAG  
CATTCATTTAAATTACGATATAAGGCAGTTGAAATTATCAGCCCAGAGGAAGAAGCACGTCAA  
TAGTAGCAGCAATGAGGATTCAACATGCCTTTGCAACTATGAGTCAAAAAAAAAAGATGACAGC  
CGCCGCTCGGATTCAGCATAGATTTTCGTACATGGAAGTACCGTAGAGAATTTCTCAACATGCGGC  
ATCAAGCTATCAAATTCAAGTAAGACCTACTCATCCTTTGTTCTTGTGACTATCCTGAGTAAAT  
ATGTCACAATGAAAATGATGTTATTTGTTTCGAGGCAATTTTGGATGGATTGACTGTGGATTCAT  
GTCAATTAGCACATATAATGTGTCCTGTGCCACAAGTTATGAGAACATTCATGCTCATCCAAGCA  
CTTTTAGTGACCACATATTTGAACTTAACAAGTCAACTATTTGTTTGTGACTATAATTTTTTACCA  
GTTTGTAAAGAGCTAGCAAATTGACCAAATCATGGCAAAGAAAGGTTAGCCTTAAATCATAAT  
CTGAAATAGGGCTTATACATTTTAGAGAATGTTGGTGTAGTATAATACCACTTGAATTTTGAAGTCT  
AGGAGTGGACTTTCTTTCCTGTCTACTCATAGCTTGCTTTCTAAAGTTTAAATTGAGACCAACTGCTT  
GAGTGGATAACACAAGTTACACCCGGGAAAAGATTAATCGTCTGTGTTTTCAATGCAGGCTGCTT  
TCAGGGGCTTTCAAGCACGGAAGCAATATCGGAAAATCATATGGTCTGTTGGGGTCTTGAGAA  
AGTGATCCTGCGTTGGCGTTTAAAGAGAAAAGGCTTTTCGTGGTCTCCAGGTTAATCCTGCCAGGG  
AGGAGACGCAGGAAAGTGATTCAATTGCAGAGGAGGATTTCTTTCGCACCCGGCCGAAACAAGC  
TGAAGAACGCATTGAGAGGTCTGTCATACGTGTGCAGGCCATGTTCCGTTCTAAGAAAGCACAA  
GAAGAATATAGAAGGATGAAGCTGACACATAATCAAGCAAAGGTGAGTAACACATGCGAATGT  
AATGTCTCATGTTTTTATTTGTTTCATTAGCTAAAATATTTTTTTAGTCTCTCAAATTTGAGATATT  
TTTTATTTTGGTCTTCAATTAAAAACTGCTCTTTTTAGTCCCTCAAATTCATAAAAATGAGCAAA  
ACTAACTTACCCAAATTTGAGGGACTAAAACATGTTTAACTTATTTTCATTCACATGTTTGT  
TACTTTTTTGAAGTCTTTATGCAGCTGGAAGTGAATTAGAAGAATTCCTTGATTCTGAAGTTGA

CATGTTACCCAAGACATAGCTTGGTGTCTTTTCCAGAACAAGGTTTCCCATATTTGGGATGTAGC  
CAACTCCTGTAACAACTAGTGTAGTATGATAGCTTGGTGTCTTCTTTTTGTATAGAAAGTAGATC  
CTGTAAATTCCTAGTGTAGATTTGAACCCATGACCCTTTCATATTGCTTTAATGTCTTGAATGGAT  
CGTCCGTGTGTAATTAAGCTCCCTATGAGGGATGTTTCTGATGCAAGATCAAGTTTGTAACTTAAA  
TAACAAGCCTTCTTAGATTTATTTAGTTATTTCAATTTAGTATAAAAGTTTTGGATTTGTCTTTGTCTTT  
GGACTTTAGGAAGATCAATTGCAACAAT

>Glyma.09G038300 (GmCAMTA9)

TAAAATCCATCATATCTGAGAGAAGCCAATGGCAGAACTTTAGAAACCGGAATATTTTTTCATTA  
AAAAAAGAAAATAATTAGAAAATAGAAAGTGAAGAAAGAAAAAGGAACAGAGTAGCAGAGT  
GTCATTTTGCCGTTTCTCTTTCTCCGATTCCAACAGACCAATCAGGTAATAATCCTACCTTTTTTT  
CTCCTCCGCTATTTGATTTGACTTTTTTTTTTTTTTTTTGTTCTCTCTTCACTTCACAACCTTGTCTT  
GATTCTATATATTATGCTCTTCACTTATTGTTCTCTTTTGTGTTGATCATGTCTTTGCTGACTTCTTGT  
AAGTTTGTCCGTGATGCAATTGTTGTTGGTTTTGTGCTAAGAGAAGAAGCTGTTGGGAAGGTTTCT  
TTCGCTTTTTGATGATGATGTCACACAACCTTAACGGGGCAGCTTGTGGGTGCAGAGATACATGGC  
TTTCACACGTTGGATGGTACTTGCATTCTTCTCTTACCCTCTATTTGCTTCAACCTCAATTTTC  
ATCAAGTTTCAATTTGAGAAGTTCCCTCTTTTTTTTTTTTTTTTTGGTGGGGGGTGGGGGGTGTGATG  
AAGTTTGAATTTGTTTGTAAAGTTGTTTTTTGTCTCATTTATAGCTAGTTTTTGGCTCCTAGAGATG  
GTTGTGTGTGAGTTTCAATGCAACCTTGGAGTGAAGAAAGAAAGTGTGGTTGGTTTGGCTGTGGA  
TTGCTTCTCCTTGATCAAGTGTGAACCTTCTCTTTGTGTTTTCTTGGAGAAAAGGAGGGAAATTTGGG  
GTTTTGGAGATTGTTCTAGTATTGGCTGTTGTTAAACTTGATTAAGTTCAAACACTTTTTTGGGAGA  
ACCAACTAGAAATCATTCTTTGTGAACTTTTAAATTATGGGTATTGGTACTAAGGTTAAAAAGCT  
GGGTATCATGACAACCTGCCCAATTTATTGTGTTGTTTCTGTATATTAGAGACTGTGTTGGATAA  
AATTTCTCAATAACACTTATATAGGAGAAGCAAATAAGGGACAAAATGAATCAAACCTTGTTCGT  
AAGTTAAAATTAACCTTATGCATCTCAGTTTTTGAAGTAGTTAGATGAGAAAGTTTTATAAACGT  
AGGAGTCCGTAAGTGGATTTTAACTTACGTGAGAAATTAATTCATTTTTTTCTTCTCCTATAAGC  
ATTTATTGAGAGGTTTATCCAAATGAGATCAAAGCACTTTTTTTTTGTTTGTGAGCAGACTAAC  
AATGTTCAATTAACCTTACCATATGTTTGAATACAGTACTGAGATCAACTAACTGAAATTTTCT  
GAAGTATTGTTAATAGTTAATTCTATGTATTGTGTTGCTATGACTATGAGTAAAATAGTTTCCTGT  
ATTATGTATAAGATTTATTAATTGTTACTTGTAGTATCTTAGACTGTTGTGACTGCAGAATATATT  
AATTTTGTGAATCTGCAACATGTTCAAACAAAACCTTTGCAACATATAGTTAGAATTTAGAAAGT  
TTGTGACTTTACAACGATTTGTCCCAAGACTCAGTAAACCAGGCGAGATGTCCAACCTACGTATC  
AATATCAACTTTTGTAGGATGTGAAATAGTTAAAGGAAGCAAAGATTAAAATCTCAAGATGT  
GAAAGTCCGCTTTAACTTTTGGTTCAATATGGTATAGAAAATTGTACTTTTCAATGAGGGGTTA  
TATTTGCTATGTGTTTCTTTGCTATTTGCTTCCAACCTGCAGATATTATCACTACTACCAATTGTGTG  
GTCAATGGTAAATGCATATTAATCATCACTGTTCAATTTGTTTTCTAAAGTAATTTCTTATGTTGCC  
CAGATTTGGATGTTAGTAATACTATGGAGGAAGCAAAAAGCAGATGGCTTCGTCCCAATGAGAT  
TCATGCCATACTCTGTAATCACAATATTTCAAGATCAATGCCAAGCCAGTAAATTTGCCCAAAA  
GTAATCACACACTGCTATTAGCAGCAACTTGATGTTTGTGAATTAGATAGATATGCATTGTCATAT  
AGATCGTTTTCTCATCAATTTTGTCTTGTCTCTTTCAACTTTTTATTTCTTAATTTTCATGAAACATTTT  
GAGTTCGTTTCTCCTGAGCATTTCATGTTTTGCGGATTGTGTTATAAAGATTATTGTAACATGTAG  
ATCCTGAAGTTCTTGTGTAAGCATGTCTTAACAAAAGTAAAATACATAAAAGAAGAAAAAGTT  
TTATACACAAATTTATGCATTGTTCAAGTGTATATGTTATGAATATAAAGCAACATAATACCTCTG  
ATTGATTTCTGGCATTCTTCCCTCATAGATCTATTAATGGAATTTTAATTACAGTAATGTTTTTGC  
AACTAACTAACAAGTTGTTTGAAGTATTGAGAATTATATGATGCACAACAGGATTCTGATCATCT  
GTGCTAATGTTATATTATAATTTGTTTGTAAAACAGGTGGTACTATTGACTATTTGACCGCAAG  
ATGCTTAGGAACTTCAGAAAAGATGGGCACAATTGGAAAAAGAAAACCGATGAAAAACTGTT

AAAGAAGCCCATGAACACTTAAAAGTGAGGATTTTAAATTTTCGTGGGCGTTTATTTGAAATTGTG  
TTAGCAAGTACCCCACTGAATGTAGTTTATTGAAGATGTATCCAGGGAGTTTGAATGGTTCCCTCT  
ATATTGAATTTGGTCTTCTAATGGTTTTGCCTACTATAGTAAAATTGGTCTTTTTTAATAGTGTCTG  
ATGTTTTGTTGTGCCTTCTTGATCCAATTTAATTGGACTTTCAAAATGGTTTTACTGAATCTTTGGT  
TGTATAGAGTGATCAATGCCGTTAGTTGATCAATCGTAGAGTGTTTTTGGCAAGATGGACTGTGA  
AGGGAATAAAATATTGTGACATGAATATGATGGAGTATATCAAGTGGCCTTATGAGTTTTTAGGT  
TAAATATTTAAATAAGCCACTAGAATTGGGTTAGTGGTGAGATGTTTATAGATAGTTTTTCATGAGATT  
ATAGGTTTGAATGACCTGCCACCTTGATACTAAAATAAGTTAAATATTTAAAACACTGGGAGCTTT  
CTAAAGCTCAGTTGTGCATTTTACTAGTTTTATTGACACCATCTTCAATTCATGTGCTTTCTTCAA  
TGAGCCATGAGTGGTAATTTGTTGTTGGACTTTTGGAAATTGTCACATTCTGTGGATTTAGACATCA  
TTTTCTGTTAGATTTAGGAGTAATAATTAAGTAATGTGATACTTCTAGATTTATATCACACATTCTCT  
ATACTTTGGGTTGTAAAATATTTAGTTATATTTTTATCATTCTTTCTTGGTGACATTTGAGGAATAA  
ATTATATTTCTCTTAAATATTGTCACCTTATTACACTATATTTTTTGTTATCAGCTTCTCTTCTACA  
GTTTTTGTATATGTGATTCCAATGTTTCGATTGAGTCACTAATGATGCGTGTCTAATTTTTTACATT  
CCTTCTGTTCAATTTTTTTCTGTCATCAATCAGGTTGGCAATGAAGAAAGGATCCACGTATATTA  
TGCACATGGCCAGGATAAACCAACCTTTGTTTCGTAGATGTTATTGGTTGCTTGATAAGTATGTTTT  
TCTGGACTTCAGGTTCTCAATCCAATATATCATGCGTGTCTGTATTTGTGAAGTGAAGTAAAC  
AGGGGTTATACATTTCTGCATTTTTGTTAAACAGAGAATAAAGATATGTTTGCAAATAGTAATGT  
GACTTACAAATGTTATGATTTTATTTTTCAGGAGTCTGGAGCATATAGTCTTGTTCATTATCGTGAC  
ACACAAGAGGTTAGAAATTGTGTTAGAATATTTTATTGATTTCTTTGTAATTGTTTCCTTTTAAATTT  
GCTATACATATTACATAATTAGGGTAGTTAGGCTGAATATCTTTTAGATATTGTAATATTTGTTCCC  
CTAGTTATGGGAAACCTCTTTGATCCTTTGTACAAAATTTCTTTATGTATGATAAGGCTTGGAGAC  
TCTCTCCAAGCAAGTTTTTTCAGTCAAATATTTGTTCTTTGTTTCTGTTTCAAGTTGGTAGCAGAGC  
CTACATCAACTGGGCTGATCATTGAGTGTGTCTGGATGCACAAAATTTGTCTATAAGAATAAT  
GTCTCACACCAACAATGTTTTTAAATTTGGTCTGGTTGGAAATTTCAATTTATTCTCTGTGTGAAGTAC  
TCTGGTACTTTATTTTTTATTTTTTATTTTTGCTTTTTTAAAATTTGGGAGGGGGATAAAGTATCTTG  
TATACTGTTGTTTTCCAATGCAAGGCATCTGAAAAAACTCCTCTAAAGGGAATTTGTGTCTAAA  
GTGAGCAAGGGGTGTTTCCATCCTTAAATTTAATGAGTTAAAATCACACTCTAATTGGAGATAT  
AAGGTTTGTGGTTGGTTAAGGAGGGAAAGGTCGTGGGTTTATGCCCTCCCGCTAACAAAAAATA  
ACAATTAACATTTGTCAATAAAAAAATAACTCCAATTTAAGTTAAATCAAAGGGTGGATAC  
ACCCTTAGTTAGAGGAGCTTTTCCCTGACTCCCAGTGTGGATGTGTCATTATGCTTTACCATTTGA  
ATTAGTTATTGAATAAAATTTGGCTTTCTAACCTTTGTTAGGTGGTGGTTTATGATACAGTTACAAT  
TGCAAGGTTCTCCTGCTACACCTGTAAATTCAAATTCAGTTCTGTCTCTGATTGAGCTGCATCTT  
GGATTCCATCAGATGACTTGGATTCTGGGGTGAACAGTGCATATGCTGTTGGTGAGAAATAACTT  
TAGATGATCTCAGTCTATGTTCTTACATTTCTTTGTAATACATCTTATATTCAGAAGATGTTAAGTG  
TTTGTAGGAAAAAATGGAGCAGGATAATTAGTTAAAATAATTAATAAAAAAATATGCGCAG  
TGTGCATGCTTTTTTATACATTGCAAATTTTTATTCCTCCCACTCCCGCCATTTTTGTCTTAAAGCCCA  
TCTTTCCAAAGGAAACCATAAATAAGAGCCTTTTTATTAGTTGGTTATGATCTAATGATCCTATAT  
ATATGGTTTTCTATTGTCGCTGTTGTCCATACTGTTGCTTTCTTTCCTTACTAGGTATATAATATTAG  
GAAGTCCCACATCACCTGCCTCAGTTCTTGGGATGTAGCTTATATATCTGTTGGACAACCTTCACTT  
AGTGCCTATTGATTTTAAAGTTGAAATCTAACATATATCCTCATCCCTTTTTTCTTTTTTCTTTTTTGA  
GATAAACAGAGCTTAAATGACAGTTTAACTGCCAAAAGTCATGAGCAGAGGCTTCATGAGATTAA  
TACACTTGAATGGGATGACCTAGTGGTTTTCAAATGCCAACACTTCTACTACATCTAATGGAGGTA  
ACTGTTTGCATTTAAGAGAACCCTTTGCTTGTGGGAAAGAACCTTATTATTTTATATGTTAAATT  
TACTTTTGGCAGGCAATGTTCCATATTCATTTCAACAAAATCAAAGTTTACTGAATGGAAGCTTTG  
GCAATGTAAGATGATTGCCTTTCTTCTAATTTGTGTTTTTTATTAAGCTGTGTTGTGCTTTTTTCAATTA  
TGTTTGTGGAAGGTTTTATGGGACCATTACTCCTTTGAATTTTGTAGATGAAAAAGAAATTTAT  
TTGGAGAGAAAAGAAGTAAAGCACAACTATGGGGAGGGTAAGATGTTCTTTGAAATAAAAAAGA

GAGGAAAAAGAAAGATGAAAGAATGTGGCCTACCAATCTTTGTGTATGGGAAATGAAAACCTCCC  
TTGAAACAGCCTTGAGCAGCATGCCAAAGAAAGGCCAATAACACTCAAAGCAAATCTAGGGGT  
AAAATGCAGGCATTCTTTTTCAATCAGCCATACCGACACAAGCTGCGCACAGCCAAAAACGTTTC  
ACCCCCTTGTTGTTAGTCCATTATGAGTTTTCAATTTTTTTGGCTAATCCTTTTTAAAGTGTATGTA  
ATACTGTCAAAGAGACAGCTTTATATCATTTTTTTGCAAAGGTTAAGTAGATGCTCAAGCATC  
CAGGATCTAGCATTGCTCATGTCTTGCTCCTACTATTGAAACTATTGTTCTTCTGTTGATTATACGAA  
GTTATACACTGTTTTCTTTCTTTTTATTTTTGGCAGTTATTACTTGTTTTCATGGTGTCTCTTGAGC  
TAAGACTTAACTCAGTTGTACCCATTTACCAAAGTCCAAGGAACTTGGTATATAATATATCTTTCA  
CACTTATATAAGTAAAATGTAAATATATTTTTATATCTCTTAAATTGGCTGAAAAATCGTTCTTATC  
AATAGATGAAACATAAAAGGTTATTGTTTATATTGATAAAAATTTGTATCTTAAATATATTTTC  
ATGTTCTTCTGCTTCTTTCTGTCTTTCTTCTAGTGATACTTGCTTTGTGATAGCTGCTGTTGTAACCT  
ATATAGGGCTTTTGTTACCAGGTATCCAGTGATCCTTCAGCAGAAATTCCTTCTTTTGTAATTTA  
ACTCAGCTAGTTTCTGGGAGCGATAGTGCTCCTTATAGTTTCCCAGAAAGTGCTGATCTTTTGAAA  
AGTAGTCTTTATCTTCGGGTGGTGTGACACCTTGGGCAGTTTGGTCAACGAAGGCTTGCAAAGT  
CAGGACAGCTTTGGAACATGGATGAACATCATGTCCGATACACCATGTTCCATAGATGAATCAG  
CTCTTGAAGCAACAACCTTCTTCTGTTTCAATGATGTTTACTGTTGGCAGATAATAAGCAAT  
CTTCTCTGCCAGAACAAGTATTTAATCTCACTGAGGTGTCCCTGTGTGGGCATCTTCCACCGAGA  
AAACAAAGGTTTCTTTTGCTTCTCATATGTCTAATTGCTATCAATTATTTTCTGTTATAATTGCTC  
CTTTAGCACAAAATGTAATATTTAGTTTCTTGGTTAAATTCTCTGCATTTTCATTGAGTCTTGGACA  
ATATAGTATGGCTGTGGAATTTCAAAGCTTCAAACCTATGAAACCTAAAACCTCCATGAGGAGCAC  
ACTATCAATCTTTTTAGTGTAAAAAAACAAAGAGCATTTCAGTAGGCACCATTAGCACTCTG  
GCTACAAGCATGATTAATTCATATGTTTGCTACCATTTTTATTTTTTTGCAATTATAAGTAAACAT  
TTAATGTCTCTTACTTCTTGCAGGTCCTGGTAACTGGATATTTTCATAATAACTATCAACACCTTG  
CAAAGTCCAACCTACTGTGTGTCTGTGGTGTGTAAGTGTTCCTGTAGAAATTGTTGAGGTTGGAG  
TTTACCGGTGCTGGGTATCACCACTCTCCTGGATTGGTCACTCTCTATTTGAGCTTTGATGGCC  
ATAAGCCATCAGCCAAGTTGTTAATTTTGAGTATCGTACTCCTATTTTGCATGAGCCAAGTCTT  
TAATAGAAGAGAAATACAACCTGGGATGAGTTTCGACTTCAGATGAGGCTTGCTCATTGCTCTTT  
GCTTCAGACAAGAGCCTTAACATTTTCTCAAGTAAAGTATCAACTAATGCTCTGAAAGAGGCTAG  
AAGATTTTCTTCAAAACATCATATATCTCTAAAAGTTGGCAACACTTGATGAAGTCAATTGATG  
ACAAAACAATTCATTTTCAAGTAAAAGATGCCTTGTGTTGAACTTCATTGAAAAACAAATTA  
AAGGAATGGCTTTTGGAACGAATTATCTTAGGCAGCAAGAGTACTGAATATGATGCGCAAGGGC  
AAGCTGCAATTCATTTGTGTGCAATGCTGGGATATAATTGGGCAATTCCTTATTTACATGGTCGG  
GCTTGTGCTGGATTTCCGTGACAAATTTGGATGGACTGCTCTTCATTGGGCAGCATATTATGGAA  
TGATGGTACATGGATATCCTAGCTGCAACAACATTGACCTAAAATTCATTTTCTGACTAGTTATA  
ATTTTTTTTTAAAAATCATTTTTTGACTTGATTTCACTGTTTCATGTTCTTTTTCAGTTTCTTTTACTG  
TAGTGATAAACAGGCGCAATGTAATATATATGATCTTATCATGAAATTAGGCACTATATGATCTT  
TTCAGTTTCCATATAATACTTGTGTGCATTTTTTTCTTTTTAATCCACTAACGAGCATGAACAACT  
TTTCATTGTTTATTTGATTCAAATTTAAAATTTGTGTCTGCAGAGAGAAAATGGTTGCAACTTTGT  
TATCTTGTGGGGCAAGGCCAAACTTGGTCACAGATCCAACCTCCTCAATATCCAGGTGGATGTACT  
GCTGCTGATCTTGCTTATGTGAAGGGATGTGATGGCTTAGCTGCTTACCTTTCTGAGAAGTCTCTG  
GTTGAGCAGTTCAATGACATGAGCTTGGCTGGAAATATCAGTGGCTCACTGGAAACTAGCTCAAC  
TGATCCAGTAAATGCTGCGAACCTTACCGAGGACCAACTTTACCTAAAGGAGACTTTGGAAGCTT  
ACCGTACAGCTGCCGAGGCAGCAGCACGTATTCAAGCTGCATTTAGGGAGCATTCAATTAATTA  
CGATATCAAGCAGTTGAAATTATGAGCCCAGAGGAAGAAGCACGTCAGATAGTAGCAGCAATG  
AGGATTCAACATGCCTTTTCGCAACTATGAGTCAAAGAAAAGATGGCAGCCGCTGCTCGGATTC  
AGCTTAGATTCCGTACATGGAAGTACCGTAGAGAATTTCTCAATATGCGGCGTCAGGCTATTA  
ATTCAAGTAAGACCTACTCTTCTGCTCGGTTCTTGTGATTGTCCTGAGTAAACATGTCATAATGA  
AAAATGAAGTTATTTGTTCAAGTCAATTTTTGGATGGATTGACTGTGGATTCATGTCAATTGGCAC

ACATCTTAATGTGTTCTGTTTCACAAGTTATGAGAACATTCATGTTTCATCCAAGCACTCTTAGTGA  
CCACATATTTGAACTTGACAAGTCAACTGTTTTCTGTTGACTTTGAATAATTTTACCTGTTTGA  
GAATAAGGAAAATTACCACAGTCATGGCAAAGAAAGGTTACCCTTAAATCATAATCTAAAATAG  
AACTTATACTTTTGATAGAATGTAGGTGTAGTATAATACCACTTGAATTTTGAAGCTTAGGAATTGA  
CTTTCTTTCCCATCTAATCATAGCTTACTCTCTAAAGTTAATTAAGACCAACAGCTTGACTGGAT  
AATACAATTTACACCCTGGAAAAGATTAATGGCATATACTTTCAATGCAGGCTGCTTTCAGGGGC  
TTTCAAGCACGGAAGCAATATCGGAAAATCGTATGGTCTGTTGGGGTGCTTGAGAAAGTGATCCT  
GCGTTGGCTTTTAAAGAGAAAAGGCTTCCGTGGTCTCCAGGTTAATCCTGCCGAGGAGGAGACA  
CAGGAAAGTGATACAATTGCAGAGGAGGATTTCTTTCGCACCAGCCGGAAAACAAGCCGAAGAA  
CGTGTGAGAGGTCTGTCATACGTGTGCAGGCCATGTTCCGTTCTAAGAAAGCACAAAGAAGAAAT  
ATAGAAGGATGAAGCTGACACATAATCAAGCAATGGTGAGTAACACATGCAAATGTCAAATGTC  
TCATGTTTTTATTTTATTTTATTTCATTGGCTTAAAATAAGTTTTTAGCCCCTCAAATTTGAGACATTTTTGC  
TTTTGGTCTCTGATTAAAAACTGCCCTTTTTAGTCCCTCAAATTCATAAAATGTTGTTTTCTAGCC  
TCTCAACTTCACTTTGGGGGACTAAAAAGACAAACCAACTTACCCCAAATTTGACGAACTAGA  
AACATGTTTAAAGCCTATTTTCAATTCACATGTTTGTTTACTTTGTTGAACTGCTTTATGCAGCTGGAT  
GAATTAGAAGAATTCCTAAATTTCTGAAGATGACATGTTACCCAAGACATAGCTTGGTGCCTTTTC  
CAAAACAAGGTTTCCCATATTTGGGATGTAGCCAACCTCTGTGACAACTAGTGTGTAGTGATA  
GCTTGGTGTCTTCTTTTATATAGGAAGCAGATCCTGTAAATTACCTAGTGTAGATTTTGAACCCAT  
GACCTTTCATATTGCTTAAATGCTTGAATGGGTCGTCCGTGTGTAATTAAGCTTCCCTATGAGG  
GATGCTTCTAATGCAAGATCAAGTTTGTAACTTTGTTTTTGGTGAAAAATCAAGTTTGTAACTTAA  
ATAACAAGCCTTCTTAGATTTGAATTGACATAATTGTTGTTGGAAGCTTCTCTATGTAATAAATTA  
GAGTCCATTATATGATGATTGTTGGGTTTATATTTTATATATTGACTAAAAC

>Glyma.05G148300 (GmCAMTA10)

CTCAAATCAACTCTAAGCTAAGCTTCAACTAACGCCAACTGCGTCTGTTTCAGCTTTCTGCTTTTG  
CCACTTCCTTCTCAGATCCATTATTCTTCGGAACCAACTCGCACCGCAGCGAATCTAGCAGCTTC  
TGCGGTTCCAACAATGCTCTGTGTCCGTTCTACTACTTGTAGCTTTTTATTCCCTCGGATTCAACAC  
CATGACACCTGGTAAACGTGTCTTTACTTTTTCTTAATGATTAATGGTTGTTATTATTATGTCTTGT  
TAGCAAAAGAAATTGGAAAATTGGGATGTTAATGTTTTGGTGCATGTATAGTGAATTGAATTG  
AGTTGACTTGGTTTATTGGGTAGTTGAAGTGAACCACATCACTTGTGACTTTGTGTGTGTCAT  
TCTGTTTAGTTTTCTGAGGTTGGTGTCTTCAATAGGGACCATGTGAGTTTTGGAATTTGTTTGAAT  
CGGTGAAAATCAAACACTCGCACTGACAGTAAAGCACTTTAGTATATTCTCTGTAGCATGCTTTTT  
GCAATTTGATTTAATTTACTCAATTATTTTGTCTGCCCTAACACATTTTGTCTCCAAATGATATGGA  
ATATTGGAATAATTCATTGGTGCTGTACAGAGAAAAAAAATAAGTTGTTAGTTACGTTGTGC  
AGTTCTTATTAATGCATAAAAATGTCCCAAGCTTATCTAATTTCTCTGCTATAAGAAGGTAGAAA  
AGAAAACAATGATGATGATGATGGGAAGGGTTCTAAATTTTACGATTTTATGTTGTGGTTTTA  
GGTTACGAATACGATATTAATGATCTGCATCAAGAGGCTCAAGCAAGATGGTTGAAGCCTGCAG  
AAGTGATGTACATTTTACAGAATCATGAAAAGTCCAGTTCACCCAAGAGCCCCACAACAGCC  
AACCAGTAAGATCTGTGTTCCCTTTATCCAATTGATTTTAGAAAATAAAAATAAATGACAGTTTTTG  
TCATTGTTTCTTACAGATTGACCATAAAAATGCTGATTGTTAACATTATCCATTGATCTTCTTAAACAG  
GTGGATCTCTGTTTCTGTTTAAACAAAAGAGTCCTGCGTTTCTTCCGTAAAGATGGTCATAACTGGC  
GTAAGAAAAGAGATGGAAGAAGTGTGGGAGAAGCACACGAAAGGCTGAAGGTGTGTTAGTAGT  
GTCTATACTATTGTGTTTATTAGTTGTCCATGAAAAAGGAAAACCTGTTAGCTAGTAAGTGTCTAG  
AGGGGCTATCAGTTGTAGAAAATGCAGTCCATAAATTAATTTAAGAGGGGGAAAATTGTTGACT  
CTCCTGAATTGTTAGAAAAAATATATTTGTCTTTGATAGATGTCTCAAACCTGGTGAATGGTGACA  
GATGGTATTATTAATAAATATTTAAAAATCCTTATTGGAAGTTTCATTGAAGCCTTCAAGATGCTT  
TTGAAATAATGAATGATTTGCCTATCAACTGCCCTTATATACATTAGATATAACTTATTTCTGTTA

GTGATTCTTTTTAGCATGTTTATCAAAACATTATTCACCTATTGCTGCTATATTTATGAGTTTAGG  
CCAACATTTGTTTTGTGATGGTATTCTGTATACTGATTTCTCAATTTAAATGATTGTAATACT  
GCATGACTAGGTTGGAAATGTTGAAGCCTTAAATTGTTACTATGCACACGGAGAGCAGAACCCT  
ACTTTCCAGAGGCGGAGCTATTGGATGTTGGATCCGTGAGTAAATTTAACTATTAGCTAACTGTA  
TATCATTTCGTATTATTAAGCTTATCACTACATGTTGTATCCTTTAAAACAAACATGCAATTTTCGG  
GAAAAGCCATCCTAGAGGCTAACTAAATTTAAAGGAATTGCAAAGATTAGTTTATCCTAGACT  
TTGAAACAGAATCAGCCTTCGATGTACATACTATTTGTGTGATATGCTTATATATATGTTATTGT  
AATAGTCATTATAATCACTCATACTATTGTTTCATGGCAGGGCATATGATCATATTGTTCTTGTG  
CATTATAGGAACACAAGTGAGGTGAGTCTCGGATACGTGATATCAGATAAACATAATAATA  
CTTGTAGCTTGTGCATAGTGCCCTCCAGAAAAATTTGGGGAATCCTTTTGTGCAAGATTGCTCAC  
TGTCGTAACATGTTTTGGATTAGTTGTTTTACACACATCCTCCCTATTTACTGTTCACTTGTGATAC  
TCAAATAATTTAATTCATTTTCTGTTCCGTGAAATTTCAAACATTTTCTGTATTCTTTCATATTTAC  
ATTTTGTAGATGGCTCGTGCAATTGTCCATTAGCTGTTAATATTTCTTTTTAAGTTTGGTATGTTGA  
TTCTTTCACCTACCATTATAATTACTACTGTTCTAACTCCCTCTCTCCCCCTCCCCCTCTCTCATT  
TCTATTTCAAACCTCATTAAAAATGTACATGTATGCTTCCAAAGTCATTTAATAATGAATTTAG  
TAAGCACGGATAGTGTAAGGTTTTTTACATTGTCATCCAATTGTAGATTGTCATGTATGGTAACA  
TTGTTGACTTGTAATAATTTCTAATTGCGTGAATATTAGACCCTTTAATAATTACTGTGCAAAACA  
ATTCAACTATGAATTAAGTCATTCCCCATACATTCTCTAACTTCTTGAAACTTTTTCTATTCCCT  
ATGTTTATGAACATCTCTTATGCTCTTCTACCAAGCAGAACTTACCTACGGAGATGCCTACACCT  
CACCTCCCATATCCTAATTTGAAGACCAGATGCACCTTGGATAACCATTTTCTACTTATGAAGCT  
TTGATAGTTAATTCTCTATGATAAGGACGATTGGTATAAGAAAAAGTCAGTGATTATCCAAAGA  
TTTGTAATGTCCTGTTGCTTTTCTGCACTAATTATTCATTTGATGGCTTTGTGCCTCAAATAAGA  
TATACTTAAATTTTCTAAGGCCTTAAATAAAAAAATCGAAATCTTCTTAAGAATCATATTTGGTA  
TCTTGGGTGGAATTATTAGATTATATTGTTTTATTCTCTGTGTGCATAGGAACATTGTTGTGCAGCC  
CATCTTTGAGTTTTGCATTAATGCATTCACTCTCATGTTATAGGGAAAGCTCAGTTCTGGAGCTGG  
GGCACAATTGTCACCAAGTTCCTCTTCTGTGTATACTCAGAGTCCTAGCCCATATTCTACTCAGAA  
TCCAGGGTCAACATCCATACTTGGCGATTTCATATGAACCTAATCAGAGTTTCTCCAGTCCAGGGT  
CTACAGAAGTTACGTCTGATATGTTTCGTACTGAACAATAAAATGGGTACATGGATGGGACAGA  
TACAGAATCAGGAACCTCGCCTGAACTCGAGGTTACTCAAGCTTTGCGCCGATTGGAGGTGCAGT  
TAAGTTTGAATGAGGACAACCTTTGAAGATAATTGTTTCCTTCGGAAGTAAGCACGAACTACACAT  
GATTCAAACCCTCAGCACGACCAAAGGGTGATCAGCAATCAAGAGCAATCTGCTGCTTTCTCTG  
GACCTGATGATCAAGGGCTATTTTATGATGGATATAATGGAAGGCAAGGTAAATTAATAAACTT  
GATCTGTTGAGAACACATGGTTTAAATCTGTGAAATATTTTAGTGCTTAATCTATATTGTGTTTTAA  
CCTGTTACATCCAGATATATGTCTTCTACTTATCTAATTGTGCTTGCAGCATCTTACACCTGTACA  
GCTAGTTTTCTGTAATTTGTTGATGGAATTCATAGCATACCTGTTTATAGATTAAGTTGGTCAACA  
TATCATAGCCATCTTCTGTTTGGTGTATTTGTTAATTTTTCGCACTGAAACATAATCCCTAATT  
GTTATATGCTGGTTGTGTTGTGTAATTATTAGAATTTGGGTTTGGAGATTAATTCAATCTCAAAG  
CTAGCTCATTAGGTGGTAGTTGTCCCCCACTTTTATATATTATTTTAGTCAATGTTGGACTTGGGT  
TTTTCCAATATGAATCTTAAGAGAAATATGTGATTCTTATTATAAGCCAAGTAACCAGGAAAAA  
AAATGGTTCTAAACAACCTACTCACGGCTAGGTTTGTGTTGATTTGACATTACTCCAGTAGACTTT  
ATAAAAACATAAAAATGTGGAACATGCTGTAAAGTTTGGATTGGAAAATTCCATATGTTACATA  
ATAAATAAGTGTTTTTGTTCTTTTATATTGTTGATAAGGAAAATAAAATAAATGTTCTAGTCTTGA  
TAAATTGCATCTCGCTGACAGGTTAGCACTTGACTAACCTTTAATAATAACAAGCAAATTTGAAG  
TTTGAGAGAAAAGGTTGTGATATTATTTTAAAAGATGCCATGAAGAATATAACACAACATACTTA  
CAGGGTGGTGATAGCCAACCTGAATAAGGATCCTAATTAACAAGGAAAATACTAAATTTAAGG  
AAAAATTCAAGGAAGATACTAAAACAGTCTTGAAGTATACTTATACAATGGATTTTGGGCTCAA  
AATCACGCTCAAGAAGGTAATCCCGGTTGCAACAACAAGAGGCTCGAAAGGAGCTTTCTGTTG  
ATATCATATAGGCCCTGTAATCCAACCTAGATAAAAAGTTATGGTTGTTTAAATCTCACTTTCCTA



TTTAGGATCTATGGGTCATACGTGTGGGTTTCCGACACTCTACTCACTCTAAGAAATCTTTTGTTA  
CATTGCCGCCAATGGTTAGTTTGTGAAGTTATTGTGGTTTTGCCTCTGCTTGAAGTTTTCTAGT  
AAATTAGTTATTATTGTTAGACAAACGGTCTCAATAACTTAAGAGAGGGGGTGGGGGGTGAATT  
AAGTCTTACAAATTTCCCGTTAACAAATTTAATTCCCTTTAAATGATATATGATAGGCTTAGA  
ATGCAGAAGAAGAAGAAGCAATCAATTAATAATGTTCTTTAAATGTGCAAGACAAAGTAAAC  
TGCAATAAAATAACTGAGATAAGGGAAGAGAGAAATGCAAACCTCGTTTTGTCTGGTTGGTCA  
CTTCCCGTGCCTACGTCCAGTCCTCAAGCAACCCACTTGAGATTTTCCACTATCTCTATAAATTCTT  
TACAGATTTTGAACACACCTTGGGATCCCTTATCCTTGTATACAATATTCTCGCAATCCAAGAAAC  
AAACAGTCTCTTGATTACAATTGAGTTTATGAGATGAATAGAAGAATTTCTCTCCTTTAGAGTAA  
ATGATACAAATTGAAGTTCCTAGATGAATTCTCAATAAATTTGCAAGTGTTGGTCAAGAGTTGTT  
TAGAGAGGAATTGACAATTAAGTTCTCTTTGAAACTCTCTCTTTTGTATACTTTTCGAAGTCAGAC  
ACACATATATATAGGCCATTGTGCCTTTCAAATGGTTTGAAGAGATGTATCTTTCAAATAGTT  
TTTCTGAAGTTTTCTCACTGTAATCGATTATAGGATTCTGGTAATCGATTACACAGTTATATTTCTG  
AAAAGTCATGACTTTTCAAAGGTTTTTTGAAATCTCTTCACTGGTAATCGATTACAGGATTCTGG  
TAATCGATTACACAGATCAAATTCAAACAGTTTTATGCCATTAGTCAAAAATATATTCACAAAC  
TCTCTAGTAATCGATTACACAATCTGGTAATCGATTACCAGTTCAAAAATATCTTTTTAAACTGAT  
TTAGCCTTTGATACTAAAGATGTTGAGGCCAACTAAAGCAATCAAATTGAGATTCTTTAAACAA  
ATTTACTAAGTTTTTATCTTAGATTTACTTGATCTTGTTATTTGACTTGATTCAATCCATGCTCATC  
AAGTAACCTTTTTGGCATCATCAAACCTGCATGATATTCATTCACATTTTCTCCCTTTTTGATGAT  
GACAACCTATTATCAAGTAAATCTTTGGCATCATCAAAAACCTTATGCATACTTTCACAATTATC  
TGTTCAGAACCTTTTTTTAACTTTTATTTTTTAAATTTCAAGTCAAATTCAGCTTTTTATAGTTTGT  
TTTGTCTCTTCATTATGGAAAATCAAATGGGAAGAGAGGAAGGTAAGATGCTAAAACCTGTTT  
ATTGTTATAGGTGATGGTGGTGAATTTATCATGAATTAATAGACCATGGTTACCCTGATGGAAAT  
GAAAAGGCTTTATGGACAGAGGTGCTGGAATCATGTAAGTCCTCATCTGCAGTCAAGTTACCACA  
GAAAATGTATACATGCCAGTTGAAAATGTAAGTGTTGCTTCGACATATTAATAAAAATTTATAT  
CATTTTGCAATTTTATGTTTGCTCAGATGTTGAAATAATTTTCTTCATGTGTTTCTGCAATACTTAA  
AATGTTTGATTCTTAAAGCTGGAAAATTCAGTATCTTCTGCAAGAAGGGTACCAGTTTCCAACCA  
GGAAAACAGTCACTGGCTCAACTTCAACAGTAATAATTCTGAAAACCTGTATGATTTACTTTCACC  
TGGTTAACATTTTTGGCATATTTTGGTGTCTTCAACTTCTGTCCCTCCCATGTTAGCAGCTGTTT  
TCTCACAACCTCAAGGTGTTGATGAAGTCAAATTTCCCTGTCTATTCTTCTATGGTGGAAACACAAG  
TAATTAATTCTGACTACTATGAAACATTGTTTGACCAAAGCCAAATTGGAGCACCTCCAGATGCA  
AATTCAAGCTTGACTGTTGCACAAAACAGAAATTTACAATTAAGACAATCTCCCCAGAATGGG  
GTTATGCCACTGAGACTACCAAGTTTTGTGCCTTTAAAGCCCAACTCCTTGCATGCCCTATACAAT  
GATTTACTCTTTGCATAACTGGTATCTTGTGAACAATGAAAGTGCTCATTCTTTTGATTTCATAA  
CTATTGGTGCTTATACCTTACCTAGGTTCCCTGAAGAGCTTTAAAAAATTTCTTAACTTAGTTGAG  
AACTTTAAATCTATATGAAATCTTGTGGTAGTGGTGGTATAAAGCAATTATGTATAAAGCTCA  
GTCTATTTATAATAATTAGGTTAGGGAAATGTTGCTCAAGCTTGTGTCTTTGGACATTTAAGACTT  
ACAAGTTGGGAATACATGTCGTCTCTTTTTTTTCCCTTCATCTTCTTATCTTAAAAAATAAT  
GTTTAGTGTTGATTTTGTCCAAATTTGATTCTTAAAGCTTCATATGCATAGGTCATTGTTGTTGGGT  
CTCTTCTGTGCATCCCTCGGATTCTGCATGGGCTTGTATGTTTGGTGTGTTGAAGTTCCTGTTGA  
GATAATTCAGGATGGTGTAAATCTTGTGAAGCTCCATCTCACCTTCTGGAAAGGTTACTCTGTG  
CATTACTTCTGGAAACCGGGAGTCTGCAGTGAGGTCAGAGAGTTTGAATATCGTGATAAGACC  
AATAGTTGCACTCAATGTACTCAATCAGAAACAGAAGCCACTAGAAGTCCAGAAGAGCTGTTAT  
TACTTGTTAGATTAGAGCAAATGCTTCTTTCTGCATCAACAATAAAGAATGACAACATAGAATCT  
GGAATTCCTCTCATAAAACAGAAAGCTGATGATGACTCGTGGAGCCATATTATAGAGGCTCTTCT  
AGTTGGCAGTGGAACGTCGACTGGTACTGTTGATTGGCTTCTTGAAGAGCTTCTAAAGGATAAGC  
TTCAACAGTGGCTTCTTGCAGATCTCAGGAAAAAGATGAAGAGACAGGCTGCTCTTTGTCCAAG  
AAAGAGCAAGGGATTATTCACATGGTTGCTGGGTTAGGTTTTGAGTGGGCCTTGAACCCTATTCT

CACTTGTGGAGTCAATATAAATTTCCGTGACATCAATGGGTGGACTGCCCTTCATTGGGCTGCAC  
GTTTTGGAAGGTAATAGAGAACTCTAGAGAGCTTGCTACCATGTTACTGATTTATTTAGTTGGGG  
TGAAAGATGTTAATATTGCTATAACAAGGCTTATAGGTAATGAAGATAGGGAAAGCATACTACT  
TGACAAACAAAATGTGCTTGGTAAAATATGCATGTAATTTTATTTTATTTTCATTTGGAGAAGGG  
AATGCAGAAGCAAGGAAAGATAACATGGAGAAGGAAAGGAGAATAAACTATCTGATCTCTTAT  
TATAGGTATAGAGCACTAAAATGCAAGGAAAAAGATAAATGTTTCAGATATTCAAGTCTGAAAA  
TTAAATTTCTGGAGATGCAGACTGCAGGATAGATGTAAGAAAACTGATGTTTCAGTTAAAATGAT  
ATCAAAAATACACTGCTTTCAAATTCTGAAATTAACAAAATCCTTGTAGGTTAAGTTAATTGGCTTT  
CTGCAATTCCTAGCCGGTAAAGTCAAAAGTAGAAATTGATGACAATACTGAGGGTATAATAACGA  
CATGTAGCATGATTTCTTAATCATTCAAAGCAAATGCTGAGTTGCTGACTTTTATTTCTAATTA  
AAAATTTGGTTCATCCAGTCATCTGCCAGAACTGATGATCATATCAAGAAAATTAATGTCTTGTTT  
CTTCAGAAACCATTTTATAATTATCTGTTCCATTTTAAAGTATTTTGGATGTTATTTTCCTGAAGCT  
TTGTTATTCCATATAGGGAAAAAATGGTTGCTTCACTTATAGCTTCTGGAGCATCTGCTGGAGCTG  
TGACAGATCCAAATGCACAAGATCCAACCGGTA AAACTGCTGCATCTATTGCAGCCGGCAATGG  
GCACAAGGGACTGGCAGGGTATCTTTCAGAGATAGCTGTAACAAGCCATCTGTCATCTCTTACAC  
TGGAAGAGAGTGAATTATCTAAAAGTTCTGCTGAGCTTCAGGCAGATATGACTGTTAACAGTGT  
TCCAAGGAAAATCTTACTGCCAGTGAGGATCAGGCATCACTCAAAGATACCTTGGCTGCTATCAG  
AAATGTAACCTCAGGCAGCTGCGCGGATAACAATCTGCTTTTCGTTACATTCTTTTAGAAAACGAA  
GAGCAAGAGAAGTAGCTGCTAGTGCAGGTGGCATTGGTACCATTTTCAGAGATTTCTGCTATGTCA  
AACTTGCCTTTCCGAACTCACGTGAATATAATTCAGCTGCTTCAGCTGCTTTATCGATTGAGAAG  
AAATATCGAGGTTGGAAAGGTCGCAAAGATTTCTTAGCGTTGCGCAAAAAGTAGTGAAGATAC  
AGGTAATAGATGTTAACTTTATAGTTGACTAGAACAAAATGAATTCCAAGAGCTAAATAGATAT  
TATTCTTAATTTATATATAACTAGCACTTAAAGATACTCTGAAAGTGAATAAATTTGATTTTCAA  
CCAACAGTTGGTTATAGGCAAGCTACACATGCACGAGCATACTTTGATCATCTTCAATGGCATT  
TTATCAACCTTAGTTATTTGTAATTTATTTGGGCAGGCTCATGTGAGGGGCTACCAGGTTAGGAAG  
CATTACAAGGTAATATGGGCAGTTGGAATCTTGGACAAGGTTGTCTTACGATGGAGGAGAAAAG  
GAGCTGGTTTACGAGGTTTCCGACAAGAGATGGACATCAACGAAAATGAAAATGAAGATGAAG  
ATATTCTCAAGGTGTTCCGAAAACAGAAAGTTGATGTAGAAATTGAAGAGGCTGTTTCAAGGGT  
GCTGTCCATGGTCGACTCACCAGATGCTCGTGAGCAATATCATCGCATGCTTGAGAAATATCGTC  
AAGCTAAGGTAAATAAATTAAGTCTAAAAGCCGAAGAGTAAAGTGTGTTGCATTTTATTAAGCAGA  
GCAACCAATATCTCTTTAGCTTGTGTTAGTTTGCCACTAGTTGAATAATTTAAACATTGTTTTGCAT  
GAGGCTTCGATGGGGCATTCCGTGCTCAATCAGAAATAAAGACAAAATAGTAACCATACAGAGC  
TATCAACCATTTTGACCTTTTAGAATGCAATTGCTTTGTGCTGTTAATGCATAACTTGTCAATTCC  
TTGCAGGCTGAACTTGCGGGTACGAGTGACGAGGCATCATTATCAACTTCTGTAGGAGATGACTT  
ATTTATTGATGATTTTTATCCATTTCCCTAGGAGCAACGCTAGCCTTGGTAATCTTCATTATTTGA  
ATGATCAATTTGTGGCACAACCATTTTCGATGGTCTTTGTATCTAGATGCCTAGAACAAGCTGACTT  
ATTAGTTTGAGACAGTCTAGATTGTATAGTGAATAACAATGAACATTGTTACTTTGTAAAATA  
TGAAATGGTCTTGAATGCAGGTGGGGTGGGGTTTCGAATGAATGGATTAAGTTTCTTTAGCATCT  
CTTTGCGTGCCTCTTGACATCTTCGCGAATTTGATATAGCTTATGGCTGCTACCTTCTTTTACAAC  
TGTACAAGGTATCTGAAAATGTAGCATCATTGGATGAAATGTTGGAATGAGGTTAGCTTCGGGGT  
TGTTTGAGGTTTCAATAAAAATTTGCTATTAGGGTTGTTTGGAGTTTCAATAACAATTTGCTATTA  
TTGTTACTATAGGGAGGTATAATCACATATTTAGTCTTTATAATTGTACAAATT

>Glyma.18G005100

(GmCAMTA11)

TTTAACGAATTA AAAATCACTTGGTTACTAAGAAAAAGAATTAGTAATGTGTGTTTAGAATTAGAC  
AAAATAAAAGTGTAGGTAAGACAGAAGGAAAAAAGTAAACAAGAAACATTCTGGTTCTCTTAG  
GTGATTGCAAATGCTCAGAATTAATTGGGGGTATAAAAATAATGACACCAACCTTTTTCAACCA  
GTTATCTCTGTCTGTCAGTGGGCCAGTTCAAGTCTGAGAAAAGGCCGGTGTGTTGTGTGTTG

TGGCTTGTTAACTCTACAATAATATATCATCATCAACTTTTTTCATTCCCTTAGGTTTGTGTTTGTGG  
AGAAGCTAGTGCTATTTCTCCAATTTAGTTCCCTATCCCTCCGCGATTAATTACTATGCCACCT  
GGTAAGACCTTTCTCTTCATATTGCTCCCTCCGCTTTTCAGTTTTACTGGGGATTAGCGATGCTTA  
ATCAAATCTCAATATTGTTGTGTTTGGTTTGACGATAAATACTCTAGTAGAACTCCAATTGATGGCC  
AAATAGAAACAAACTTTTGTCTGTGAATCTAGACTTAATTTGATTGTAAATTTATGCTTGTTAAT  
GCTTCACACCTTTTTTTTTGGAAAATACGGTTGGGAGTTGGGAATCGAGAGTTAAGACAGTACTCT  
ACAGTTCACTTTTGCTACCACACAACTTTTACTTCATGGACCAATTTTTGTCCCTCTTACTCACAC  
GAGGGAATAAATTGATTGGACTGATATTACAGAGATAGAAAAGAGGATTATTAAGTTCTTACTTCT  
TAGTGTGTGATCACACTTAGGTTCTGCATGATTCCCTTGTCCTACCAACCAAGACAGAAGAT  
AGGAAGTAACAATAGGATGAGTTATGAATTGTTGGACTAATTTGACATTGTATGGCAGGTTTGG  
AGTACAATATCGATGATCTGTTTCAAGAAGCTAAGAGGAGATGGCTCAAGCCTGTGGAAGTGCT  
TTACATTTTACGGAATCACGACCAGTGCAGTTTACCCACCAGCCCCCTCATCAGCCAGCTGGTA  
ACACCCGTGCTCTCTTTGTTGAAATTTATGAAAGAAACGAAGGACAGTTTTTTCCGACTCTTATCT  
GCTACTGGATTATGGGTTACTGATTGTCGAAAATGTTGCCAATTGACTTTCTTAACAGGTGGATCC  
CTGCTTCTGTTAATCGAAGAATCATGCGTTTCTCCGTAAAGATGGTCATAACTGGCGGAAGAA  
AAAAGATGGCAAACTGTGGGAGAAGCGCATGAACGGCTTAAGGTCTGTTATTAGTGTCTTATG  
GTGTTGTGATAATTAATAATTACCTACAATGATCATTAAATTTTTTACACGAGGGTGAGGCATGGT  
GCAACTGTAAGGTTACTACCTTGTGACCTTAAAGGTCACAAGTTCAAATCCAAGAAATAGCCTCT  
TCACAGGCTACATGCATCTACCCTCCCAAACCTCTCCAAGCGGGAACCTTGTCTGCTAGGCTGT  
CCTTTTTTATTTGACATCTATTTGTCTTGCTGCAGCTCATGTCAGCCACTATCATCTGCCACTTTT  
GACATGCTTTATGTTTTATGCAAATGCTTCAATTTGCCCTCTAATTTGGACCAAGCTCCTTCCTTC  
TTTTAGTCTCAACTGTCAAATAAGAACAACGCAGAAAAAAGAGAAGATGAAACATACAATAA  
TCATACCATACTAACAGCTTGAATTTTCATACCAAAGGAAATTAGAGCTTCTTCTACTTCATCAC  
TTTTCTTATACTTGGATTTGGTTTATTTTCTTGCTTTAATTGCAAAAAGTCTGCTAAGGTTTCAAGCA  
GGTCTGAGTGATTAATTAATAGTTCATAAATGTAGTAAATTATTAGGAAGAAGTATTCAAATTC  
AGGCATATTGAAACAAAGTATTATTCGAAACTAATTAATGATCCTCATTGGAAATTCATTTTCA  
AATCTATCTCCTAATCTGCTCTGTGCCATATATAGCTTCCAAAAGCTTTTGGAAAAAATAGTAA  
GTATTTAGTTTGTCCAGCACTCATTATGTGCATGAGCTGTAACAGAACATTGAGATACAACCAAT  
TTGTTGTTAATAGTTTTACTGGTATGGAGCTTTTTCTTTTTAATTATAATTCATTATTTTTGCTA  
TGTTGATGCCTTGTGCCAACATTTGTTTTGCCATAGAATTCTATGTATTGATTTTCTCAATCTGATT  
GATCATTCTAATCTGCATGGTTAGGTTGGCAATGTTGAAATCCTAAACTGTTACTATGCACATGGA  
GAGGAGAACCGTACTTTTCAGAGACGGAGCTATTGGATGTTGGAGCCGTGAGTAAATTTTAACTA  
TTAGCTGGATAACCAACCATATTATTATGTTACCACTACTTGTATTGTATCTTTTAAAGATCTACCTAC  
ACACTTACAAAGCTATATTAAGGCAACTTTAATTACCAAGATTAATTAATCTCGACTGTGAAA  
CAAATCAACTTTCAGTATATGTAACCTGTATTAAGATGGGTTCAATTTATATGCCAATATGTTATT  
GTAGTGCATGTTCATATTTGTCATACACTATTGTTTCTTGACAGGGAATATGACCATATTGTTCTT  
GTGCATTATAGAGAACTAGTGAGGTGAGTTCCAGAACATGATATCAGATAAACATAATATGG  
TACTTGCAGCTTATTATGAGTGTGAAAAGGTGGGAATCCCTTTTGTGCAACACATCTCACTGTCCT  
ACACTCCTACCCTGTTTCTGAAAACTAAAATAAACTTTAAGCACATCTTCCCTTTTTCAGTGTTCA  
GATTTGAAGCTTCAATTAATAATTTGTTTGTGTTTCTTATGAAATTTCAACCCTCTTTAGTA  
TTTCTTATGAATACTGCATTTCTGTATTCTCTAATTCTTTACTTTGTGTAATGACTTACAAAGTAG  
TCCATGAGCTGTTTATTTCTTCCATAAGTTCAACTCTCTCTCACACAATCACATTTTTTCAGTT  
CTAAAACCTCCAATAAATTAACATGTGTATTTCCAAAGTAAATTAATTTGTGATGAAATAGACA  
TTTGCAATATCTTAACTTCTTGAACCTTTGTTTATATCCTCCTCTTGAATGTACTTTTCTTTATGCT  
CAGCGGCATTACTCTAACTACATAGATCTCCTCGCTACAGTCTACTTTCTCAGTGTAAGGGCC  
ATTTCTCTTGATTTGGAATTTCTCCTCTTGATCTCGTTCCCTTAGATAACAGTTTCACTCTTCTTT  
CACATCTGTTCCATCTCTCTCCTATTTCTTTATTTTGTTCGTTGCTTGAGAATTGTATCAGCAACCT  
AAGGTTGAGTTTACACTTACTGTTTACTCTCATTTTACAGGGGAAATCCAATCTGAACATGTCAC

ACAATTGTCATCAGGTTCTCTCCTGTTTTAGTCAGAGTCATAGCTCGTATACTACTCACAACCC  
AGGAACAGCATCCATGTTTGGTGATTCATGTGAACCTAATCAGAAATTTTCTAGTTCTGGGTCTTT  
AGAAGATACATCCGAAGCACAAGCCTTGCGCCAATTGGAAGAACAGCTGAGTTTGAATGAGGA  
CATTTTCAATGAAATTGCACTTGATTTAATCCCAGGTCAAGATCAAAGGGTGGTTTATAAGCAAG  
ATAACTCTGTAGCTTTGTCTGGACCAAATGATCCAGGACAACCTTGTGATGGATATAATGGAAGA  
GAAGGTAATTTAGACAAACTTGAGCTGTTAATGTTTTTTTTCGAGGGGGGAATAAAATTAATATA  
TGTTGAAGTTAGTGAAACATTTGAATTATTATTCTATTTTATGCTTTTATCTTGTATTGTGTTTTGA  
TTTGTTCAGTTATAGATGCTTGTCTTCTACTTATGCAACATATGAAGATGGCTTCTTCAGCCCTCAC  
AGCTAATTTGCCGTGACTGTTGAGTTAAATTTATAACATAACTGCTTATTTTAAGTTGTCCAAGGC  
TATCATAGCTATATATATCAGTATGACCATACTTCTATTCTTCTAATTTGTCTATGGTACCCTTCTG  
TATGATAGATTTTCTTTAAGTGAAACCTAATTCCCCAATTGTTATATGCTGGTTGTTTCATTTGAAT  
CTATCATCCACTCAACCTTTTTTTTTCAAACGTGCACATTCAGCTTTATATCAGACTCAAATTTATT  
TCATAAGATCTTTATAGTTTGTTCGCTACTCCTTATTATAATTAACAACAACACTGTAGAGAGAG  
GAAAGCAAATCTTCTGAAATTATTGTATTTTCTGTAGATGACAGTGGTACATATTATCATGACTT  
TCTTGATGATTGTCCTGGTGGAAATGAAAAACTATATACTGGACTGAAGTGCTGGAATCGTGTA  
AGCCCTTATCTGTGACCAAATTACCAGATCAACATGCATATGACGCGATTGAAAATGTGAGTATT  
CCTAAGATATACTTCATGTCATCAAGAGTTTATAATTCATTTTTCTTTGCAACTTGCAAAGAAAT  
AAAATCTCTATGCTTAAAAACAGGGAAAGTCATTATTTTCTTCAGGAAGAGGAATGATTGCCAACC  
GGGAAAAAATCAGTGGCTAAACTCCAACAGTAATAATGTTGAAAACGTGATGACTTACTTCTG  
CCTTAACTTGAAAATTTCCCTTTTTGTTGCATATAATGAAATTTCTCCATCTCTCTTTGATGTTCCA  
TATCACCAGCTGTTTTCTTGTTCCTCAAGACATTGGAGTCAAATTTCTCCATATTCTATGGTAGA  
AACTCCAGGAACACTATGACTACTATGAAACCTGTTTTGATCAATTCCAAAATCAAGAACCTC  
TGGGTGTAGATTCAAGCTTCACTGTTGTGCAGAAACAGAAATTTACAATTAGGGCAGTTTCCCA  
GAATACTGTTATGCCACTGAGACTACAAAGGTTTGGGCCTTTAATTTCAACACTTGTTATGTCTT  
ATGTAATGATTTATCACTCTTTGCACTAGGGAATTTATCTGCTGCTTCTTGGTGCTTATTACTCAGC  
TTTACCTATGTTCTTGAAGAGCTTAAAAATGCATACACAACATGGTTCAAATATGTATGCATTTTT  
TGTATAATGTAATTATATATGTAATAACTAGTTATATATATAATAACTAGGGAGTTAAAAATGAA  
AGCTCTTAGCTTTTGATTTCAATACCATTTGGGGCATATACATTGTTTCTACTCTCTTTCCATTTGA  
AATTTTAATTTTTATATGATACAAATACTGTTGATGTTGTCTATATTTGAATCCTAATTTCCCAAG  
TTATATGCATAGGTGATCATTATTGGGTCAATTTCTATGCCATGACTCGGATTCTACCTGGGCCTGT  
ATGTTTGGTGATGTTGAAGTTCCTGCAGAGATAATTCAGGATGGTGTAAATCTGTTGTGAAGCTCCA  
TCTTATCTTCTTGGGAAGGTTAATTTGTGTGTTACTTCAGGAAATAGGGTGCCATGCAGTGAAGTG  
AGGGGGTTTGAGTTTCGAAATAAGACTACTAGTTGCACTCGCTGTAATTCATTGGAAACAGAAGG  
CAGCAAAGTCTAGAAGATCTGTTATTACTTGTTGATTTGCAGAGATGCTCCTTTCTGCTTCAAC  
TACAAAGGATGACAGAATAGAATCTGGAAGTTATCTTTCAACAGAACAGAAAGATGATGATGAT  
TCATGGAGCCATATTATTATAGACACTCTTCTAGATGGCACCAGAACATCATCTGATACTGTTAA  
CTGGCTTCTTGAAGAGCTGCTGAAGGATAAGTTGCAGCTCTGGCTTTCTAACCGAAGAGATGAAG  
GGACAGGCTGTTCTTTTTCCAGGAAAGAACAGGGGATAATACACATGATTTCTGGGTTGGGTTTT  
GAGTGGGCCTTGAGCCCCATTCTTAGTTGTGGTGTGAATATAAATTTCCGTGACATCAATGGGTG  
GACCGCTCTTCATTGGGCTGCTAGGTTTGGGAGGTAATAGAAAACGTGAGTTGTTGATATTGATAT  
GCAATTGTGATAGCATTTTTGTTTGAAGCCTTGAATAATACTTGATAAAATCTGTTTAGAAACC  
TTTACAAATCCTTGGGAGAAGGGAATACCAATGCAAAGAAATAGAACAAGAAGGACAAGTAAA  
GCCTTTAATACCTACCCAGCAAACATTAGAAATTGATGGCTGCATTTAAGGAGTAATAACACAT  
CTAACAGTATGCTTCACATGCAACAGGATGTTTCAATCATTCTTGAACATGTATATAAAGCCTAA  
TCAATCAAAGCCAAATGTTTGTAGTTTTTATTTGAACAAAAATGCCTTTTTCCACCATATGGGATC  
AGCTACATTAATTAATTAATGACATTGTGTTGGACCAAAAACGTGAATTTAAGAAATGTCATTTA  
AATCAAATGTTTTTAAACGGTTTCTCTGGAGTTCCTCGTTGGTCTTCCGCTATCTCTATTGATCAGA  
CTGCCCTCCATATAATTAATTCGCCTTACCTAGGCCTCTATTGGTCTTCTCATATGATCAAACAAT

CTTATTAGACCAAATTCTGTCATAAATGATCATATCAAGGTTGAAACTCTTGCTTTTAAAAGCCTT  
TATAAATGATCTATCCATTCTAATTGTTCTGGGAATTTGGGCCACTGAAATATTTTGTTCATGATA  
GGGAAAAAATGGTTGCTTCGCTTATAGCTTCTGGTGCATCTGCTGGAGCAGTGACAGATCCAAGT  
TCACAAGATCCAACAGGTAAAAGCTGCTGCATCTATTGCAGCTAGCCATGGCCATAAGGGACTGG  
CAGGTTATCTTTCAGAGGTAGACCTAACAAGCCATCTGTCATCCCTCACATTGGAAGAGAGTGAG  
CTTTCTAAAGGATCTTCTGAGCTTGAAGCCGAGTTAACTGTCAGTAGTGTCTCTAAAGAAAATCTT  
GTGGCCAGTGAGGATCAGGTTTCACTACAAGCTTTCCTGGATGCTGTTAGAAATGCAGCTCAGGC  
AGCTGCACGGATAACAAGCTGCTTTTCGTGCACATTCTTTTAGAAAACGGAAAGAAAGAGAAGCT  
GCTGCTGACGCTGGTCTAGATGGATATTGTATTGATGCAGGTAGCATTGATAATAACATTTTCAGT  
GCTTTCTGCCGTGTCAAAACTTAGTTCTCAGAGCTGTCGTGATTACAATTTAGCTGCCTTATCGATT  
CAGAAGAAATATCGAGGCTGGAAAGGTCGTAAAGAATTCTTAGCATTGCGCCAGAAAGTAGTTA  
AGATACAGGTAACCGTAATAGAAATTGTTAATACAGTTTTACTATACTAATTGAATCCAAGAGT  
TCTGCATGTACCTGTATATTGGCAGTGTAGAAGTGTAGGTACTTTGTAAAGTGAATAAATAATAA  
ATTTTTTTATAAATTGGAATGAGGGGGGAGATAAAAGATAGCTAGACATGCACATGCATACATC  
AGAACTTACTTTTAACTATTTACTAGTATTAACCTTGGTTTTTCTAAATTTATTTGGGCAGGCTTG  
TGTAAGGGGATACCAGGTTCCGAAGCAATACAAGTTAATATTATGGGCAGTTGGAATCTTGGAC  
AAGGTTGTGCTACGATGGCGCAGAAAACGAATTGGTATACGAAGTGTCCGGCAAGAAATGGAAT  
CAAATGAAGAAGAAAGTGATGATGAAGATTTTCTCAGCGTGTCCGGAAAGAGAAAGTAAATGC  
AGCAATTGAAAAGGCTTTGAAGCAGGTGCTTTCCATGGTCCATTCTCTGGTGCTCGTCAGCAAT  
ATAGGCGCTTGCTTTTGTGTATCGTCAAGCCAAGGCCAAGGTAAATACGCTAATAAAAAGCAAA  
AAATAAATTATAGGTCTGGGATAACACCGGTTAACATCTCTGGTATCTGTTAGTTATACCACTTTT  
TGCATTACAGATTGATCAAATAAGAAGTAAGTGTGAGCATAGCTTTCATAGTCCATTTCTAATTTT  
CTTTACTGAGTAAGATAACTGTAACGCTAGCAAGTAGCAACACGATATTCTGTTTGGACACACTA  
TTTATTACTAGATGAAACCCAATTCTAGTTTTCTCATAAAATGTTGAAAATCAGAATATAATCTGAT  
CCCATTCTTTATTAGTGGGGCCAGCAGCATAAGGTTTTACTCAACAATAAAAGTGTCAAATAGTG  
GGTTGCTAATCATAAAGTAATTAGGACCTAATTAACATGCTAAGCTAGCATTAGCAATGTTTTT  
TATGTGAGGAGAGGTTCCCTGTTTTGTACAATGCATAACTTGTGATTCTTTTACAGACTGAACGT  
GGCAGCACGAGTGATGAAGCACCTTATCAACTTCGGAAGAGGAAGTTTCCAATATGGAAGATG  
ATGATTTGTGTCAATTTTGGGAAACGTTCTGGCCTTCCTAGTTTTATTTCTCTTTGGGGATAAATTT  
CTGACTTCCCAGCTTATATGGTGTGAGTATTTGGATGTGTAGAATAAGCTTGATTGAGCTTTTAGT  
TTGTAAATCAGTCTAGGTTGTATAGTGATAATGGCGATGGACACTTCTCTTTTTATGTAAAAGT  
GCCTTCAATGCTCTGGTGGTATATAGGTTTTCAAATACAGTGAAGTTTTTATTTCTTATTTCTTGT  
TTACATTTTCATCAGAAGAACTAGACAGAAGAAACCACAAAGATAAAAATGTTATATTATTAAGA  
TATTAATC

>Glyma.17G031900 (GmCAMTA12)

AATAATTTAACGCATAAGAGTCAGACTGTAGAATAGAAAACAGAAAGGAACAGGAAAGAGTGT  
CATTACAGCTCCAACGAGGCGATCATATTTCTCTGCAATCCGAACAGACCCACCCTTCTCTGCAAT  
TAGGTAAATTTACCACCTTTTCTATTTTTTCTCACTACTCTTCTAATTTTTACCCCTGTTTTTTATTTT  
ATTTTTAGTTGAGAACGATGTTTTTTTTCTTTTATCGAGTCACCACTTTGCTCTTTTTTTTCATTTTTTCAT  
GTAATATGCAGTTGCTGAGTTTTAGGTGAGAGAAAAGTGTTCGGAATTTCCCAAGGTTTCTGTGA  
ATATGGCGAATAACTTAGCGCGCAACAAGTGGTTGGTTCAGAGATACATGGATTCCACACATTG  
CAAGGCACGTACTTCACTGTTGATTAAGTGTCTAACACTGAGATGTAGTTCTTGTTCCTTAGTTAA  
TAATTATCGATGATGGTAATTTATATTAATGTTGTGAGTAGTACTAGATGTTTCAGACACAATGTCC  
TGATATTTAATTGGAAGTAAAATGATTTTACATAAGTGTTCCTCGCTTTGATAAATTATCTGAT  
AAGCCTCCTATTGTATGGATGATAATTTTTGTATCTGGTGGGAGACATCAGCCCTTTAAGTGGAT  
TTTAGAACCCTCGAGAGATTAGTCTTTGGTTTTCGGCTCAAGGATACCCCGTGTTAACAAAAAAA

AAATGTTAGTTTTTGTAGTCAAAAAGGAAAGGAAATTAATGAAAGCACGTTCTCTGTTTATTTGTT  
GTTCTGACATGTTTTCTTATATATGCCCCAGATTTGGATGTGGGGAGCATTATGGAGGAAGCAAG  
AACCAGATGGCTCCGTCCTCAATGAGATTCATGCCATGCTTTGTAATTACAAGTATTTTACCATTAA  
TGCAAGCCAGTGAATTTGCCAAAAAGTAATTATCAATTAGCTGTAACCTTGATGTTTGTGATCATA  
TCCATTCTGCTCTATCGTGCATTTTTTTATAGACAACGTGTCATCTCATCATATTCATTTTGTGACTT  
TGCTGCATACCTTAGTTCCATTAATTTTTGGAGCTTTTGTGATCTAGCTTGTTTTATAATTTGTGA  
GCTTCTACACCCTTTATTGTTGGTTTAAAATTTATTTAGTTTTAAATTTCTATTCTTAGGAGGATCTA  
TTTTCTCTAATCTCTTTGTAATCTTCTGCTTTTACTTTAATGATTTTCTTCTTTCATAAAAAATGGA  
CCATTTATTTGTATATATCATGAATAAAGCAGTATAAGGTTTTACTGTGAGTGACTTTTCATTCACT  
TATCTAATAGAACTTTGATTAGTTATTTTGCATACAAATAAGTTTTCACTATTAATGATTAGACAA  
TGCAAAATATCTGGTGAATAACTGTTGTTGTTGTTGTTATGGTTATTTTGTGTGTCAACAGGTGGT  
ACTATTGTCTTATTTGATCGCAAGATGCTTAGGAACTTCCGTAAAGATGGGCACAACCTGGAAAAA  
GAAAAAGGATGGGAAAACCGTTAAAGAAGCTCATGAGCACCTAAAAGTGAGGATTTTCATTTTC  
TTGGGTGCTTTTATCCGIGATAATTTTTTATTTAATTTGTTTTCTTTAACATATTGTAGATGGGAT  
AATTTATCATTTTTTGTAAATGTGGAGTATGAATGAATTAACACTAACAGAGATGAGAGGGTATA  
GCAAGTAGCCTGACAAGCATTAGATGTGGTTAAATTTTGAAGACATAAGGCTTCTTGGAGCTCA  
GTTTTCTATTCTACTGATTTTATTGATGTTGTTCAATTCATTGTGCTTTCTCTATAAATAGTACTTTTT  
TCTTTTAGGAGAGTTTTGGTGTTAGTGAGTTTATTAGATATTGACCTCTTCTAGATCTGTAAGTGC  
TGAAGTATTTAACTGGTGTGATGCTTACTTTATATAAGGCATTATCTTGGATTTGTATGTCATATGATT  
TTTGTACAATGATCCAGTCACATATCTATCATTGTTTCTGGGTAGTATTTGAGAAAGAGATCAGTT  
TATGGCTTTCTGCTTAAATTTTATCACCAAGTTAAGTGTTTATTCTGTATGATCATAATTCCTTCCCT  
CAGTTTTTGTATTTTTTATTATTAGCATCATATCTGATTTTTGACATTCCTTCTGGGCATTTTTTTC  
TTTTCCCATTCATCAGGTTGGTAATGAAGAAAGGATCCATGTATATTATGCACATGGCCAGGAT  
AACCCAAATTTTGTCCGAAGATGTTATTGGCTGCTTGATAAGTATGCATATCAACTGTTTCTTAAA  
GCTCCCATTCAAAATTTTATGCATGTTCACTGCTGAATTTTTGTAGTATGGTGCTTCTGTTA  
TTCTTGTATATATTGGTTAAAGCATAAAAATTAATAAAGTTTTCTAATGACAATGTGACTTAAAAA  
TTGTTTTCACTATTTTCTTTTTCAGGAGTATGGAACACATAGTCCTTGTTTATTACCGTGAAATACAG  
GAGGTTGTGTTTACGCTGCTCACCATTGCCTCTATTTTTTTTTCTTTTAAAAGTTCAATTTAATGTCA  
CAAACCATGATTTGTGTGTCATGTGTATGTTGTTTTGTCTGGAAGAAAGACTATATACATATATAG  
TCATTAGTCACTTTGATTTACTCTTTATGACACTTTAAATATGAGTTTTATTTCTAATTATAACCATT  
CACTGTTAACTGCTAAGTGCTAGGATTTTAGAATGCACCTTAAATATGACACTTAGCAGTTAAAA  
TCTCTTTATAAATTAGAAATAAACTTCATGTTTAAAGTTGCCATTTTTGCTCTAAAGTTTTATTGTGAA  
AATAGATATAACTGGCTTTGTGACATTCCTTTGGGTTGTTGTTTATGATACAGATGCAAGGTTCTCC  
CGTCACTCCTGTAAATTCACACTCCAGTTCTGTCTCTGATCCTCCTGCACCATGGATTTTATCAGA  
AGAAATAGATTCAGGAACCACAACCTGCATATGCTGGTGGTGAGAAATAACTTTTATATTTCTGTG  
GTCTATCTTCTTAAAAGTTGTACTGCTGTAAGCTATTAATATGAAAGGCTAATGAGTAAGACATTT  
GTTTAAAATACTTATATTTTAAATTTTGAAGATGTTAAGTGTTTGGTTTGGAAACAATGAGAGGCAGG  
ATAATGAGTTGCAAGAAAAGAACACGTGCTATGTGCATGCTTTATATATTGCAGATATATTCCTT  
CTACCTCATTTCTGCTCATCTTCCAAAGGAAGCATAATATATTTTTTTTACCAAGGGAATAGTTGG  
TTGAATGAGGTGCATGAGTTGTTATAAATCCCATGGTACATGTCTTTGATTCCCTATGGATAAAAAA  
AAAAGATTTTTTTTTTTGTTGGCTTATAATGCATGCTGTGTATGAAAAAATAAAAAATGATTAATA  
AACTATGACTGTAGTTGTCTTGATAAGGTATATATCTCATCCTTTCTGATTTGGACAAAAACAGAC  
ACGAGTGCCAATATAAATGTCAAAAGTCATGAACTCAGACTTCATGAGATTAATACACTTGATTG  
GGATGACCTGGTGGATGCAAATGATCATAACACAACCTACTGTGCCTAATGGAGGTAATGGTAG  
TTCATCAAAGCATAATCAGTCACTTGTCTGGATTGCACCATAATTTTTATTATAACTTTAAATTA  
CTTTTTCCAGGTAAGTTCCATATTTTGTATCTACAAGATCAAATTTTACTGAATGACAGTTTCAGCA  
ATGTAAGATAATATTATCTTTCTTTTATTTGTATTTCATGACTGTTTTTTGTTGTCTTTTTCTCATTTGA  
GTTCTGTGATGGACAGTTAGTTCTTTGACATTTTTTACATGGGAAAGAAAATTTATTAGAGAGAA

AATGAGTGAAGCACTGGAGAATAACTAGGGGGAGCATAAGATATCCTCTTTTCTAATACTAAAA  
ATGAAAGGTCAAGAAAGGAGAAAGATTCCAAGATGCAGCAAAGTCCGTTCAATCTTTCCATG  
TTGATAGTGA AAACTATCATGAAAAAGCCATGAGCTATTAATCACCAGAGAGAAGCCAAAAGTA  
CAA ACTTATCCTAAAGCAAACCAAGGGACCAAGAGATCCTAAAAATGCAGGCATTCTGCTTCAA  
CCAAACAGGCCAAAGAACTGCAAAA ACTGCATTGTCATAAACTTTTGCCTCCTGATTGTTGGTC  
CTTTGAAATTTATCATAAGACCATTTTATCCTATTTAAAGTATATGTTATAGAGATTTTATTATATT  
TCCTAGACAACATGTTTTATAGATGTTTCAGGCATT CAGCATCCAGGACTTCGGTTTTACTATTAG  
ATTATTGTTTAATTATACATGATTAGGAGTTAAAATGTCATTTTACCTTTGTGATACTATTTTTCAA  
ATCACCTGCAATCACATCTAAAAAAGGCCACAGCCATTTTGAAGAACATGCCTTGAAATTATAGT  
GAAGGAAATGCTTATTTTTACTTTTTATACCTCATATTTGATCATTTCCTTTGTTTCCTTTCCCTCT  
TCTCCCTTTTTTTTTTCGTTCTTTTTTCTGGAGATACTAACTTTGTAATAGCCACTGCTTTGTTATACT  
TGCTTTGTCACCAGGTAGCCAACAATCTATCTGCAGACATTCCTTCTTTTGGTAGTCTCACTCAGC  
CTATTGCTGGGAGCAACAGTGTTCCCTTACAATTTTTCAAGTGTTAATCTTCAGACGATGGACGATC  
AAGCAAATCCACATGAGCAGAGGAATAACAGTTTCCTTAAGTGGTGTGATTTCCTTGGACACT  
TTGGTCAATGATAGATTGCAAAGTCAGAACAGCTTTGGAATGTGGGTAAACCCCATCATGTCTGA  
TTCACCATGTT CAGTAGATGACCCAGCTCTTGAATCCCCAGTTTCATCCGTT CATGAACCATATTC  
ATCTCTGATAGTGGATAGTCAGCAATCTTCTCTGCCAGGACAAGTATTTACTATCACTGATGTATC  
CCCTACATGCGTATCTTCCACTGAGAAATCAAAGGTTTCCTTTGCCCTTCTGTAGATCTACTTGTCT  
ATTATTTT CAGTTTTAAGCATATCTTTCCTTAATGTTTTATTTAGTTTCTTACTTCTTAGTTGATTCC  
TAGTCTTTTCTTTCAATCTTGATTGATTGAGTTCCTGTTGAATTCATAGCTGTAGACTGCAGAAAT  
ATAAACTCCGAGTATTATGAATTATTAGTTCTTTTCAATCTAGCCAAATTCATTTGTAATTGGTTAT  
GAATTGCTCTTTGGCTGCAAGCATGCACATCTTCATGTATACAAATTATAACAGAATTTAACATA  
GTACATACTTGCTGCTTGATGAATTCATATGTTTGCTACCTGTTATTTTGACTTTCTGAATTCCTTA  
CTTG CAGGTCCTGGTGACTGGATTTTTTCATAAGGACTATATGCACCTTTCAAAGTCCAATCTATT  
ATGTGTCTGTGGTGATGTTAGTGTTCTGCAGAAATTGTT CAGGTTGGGGTCTACCGGTGCTGGGT  
ATCACCACATTCTCCAGGATTTCGTGAATCTCTACATGAGCATTGATGGCCATAAGCCTATTAGCC  
AAGTTGTTAATTTTGAATATCGTACTCCTGCTTTGCATGATCCCGCGTTTCAATGGAAGAGAGTG  
ACAATTGGGATGAGTTTCAACTACAAATGAGGCTTG CATATTTGCTCTTTAAACAATTGAACCTTG  
ATGTTATCTCCACTAAAGTATCACCCAATAGACTTAAAGAGGCTAGACAATTCGCCCTCAAACA  
TCATTTATTTCCAATAGTTGGCAATACTTAATCAAGTCAACTGAAGACAACCAAATTCATTTTCA  
CAAGCAAAGATGCTCTATTCCGAATTGCATTGAAAAGCAGACTAAAGGAATGGCTTTTGGAAA  
GAATTGTTTTAGGCTGCAAGACTACTGAATATGATGCTCATGGCCAAAGTGAATCCATTTGTGTG  
CAATTTTGGGATATACTTGGGCTGTTTCTTGTTCATGGTCAGGCTTGT CATTGGATTTCCGTGA  
TAGGTCTGGATGGACAGCTCTTCATTGGGCAGCATATTGTGGAAGGTATAATACACAGACATTCC  
ACTTGTTTAAACCATTAGCTCTTCTGTA ACTACATTGACCTAAAAATCCTTTTTTGGCGTGGTTTCA  
CCATTACATTCTTTTCTGTTTTTTTTTCTTCATACACTTCACATTAACATAATCAATGTGAATTTA  
GCATGATTTTGGGTAAAGTAGGCTGCTTGA ACTTTGAAATTGAAATTTTCTTATACATTTTGATTTAA  
AATTTGATCTTCAGGGAGAAAATGGTTGCAACTCTGTTGTCTGCTGGGGCGAAGCCAAATTTGG  
TCACTGATCCTACTCCCCAAAATCCTGGTGGATGCACTGCTGCTGATCTTGCTTATATGAGGGGTC  
ATGATGGCTTAGCAGCTTATCTTT CAGAAAAATCTCTGGTTCAGCACTTCAATGACATGAGCTTAG  
CTGGAAATATCAGCGGCTCACTTGA AACTAGCACGACTGATCCGGTAATTTCTGCAAACCTTACG  
GAGGACCAGCAGAACCTGAAGGATACATTGGCAGCTTACCGAACTGCTGCTGAGGCAGCTTCCC  
GCATACATGCTGCATTTAGGGAACACTCTCTAAA ACTGAGA ACTAAGGCGGTTGCATCTTCCCAT  
CCAGAGGCTCAAGCACGCAA AATAGTTGCAGCAATGAAGATTCAGCATGCCTTTAGGAACCACA  
AGACAAAGAAAGTGATGGCAGCTGCTGCTCGCATACAGTGTACATACCGTACATGGAAGATTCCG  
TAAAGAATTTCTCAACATGCGTTGTCAGGCTGTTAAAATTCAAGTAAAAGCTTCTTCTTAGTTGT  
CACATACATTA ACTGCAGATTTTGTGGGCAAATTGACTAACATCTATGTTAAAATGCAGGCTGC  
GTTCCGGTGCTTTCAAGTGCGGAAGCATTATTGCAA AATCTTTGGTCTGTTGGTGTCTGTTGAGAA

AGCAGTGCTGCGTTGGCGTTTGAAGAGAAGGGGTTTCCGTGGGCTCCAGGTCAAAACTGTGCGAA  
GCGGGAAGTGGAGATCAGGATCAGCAAAGTGATGTAGAGGAGGAATCTTCCGGGCTGGTAGG  
AAACAAGCTGAAGAACGTGTTGAGAGATCTGTGGTACGTGTGCAGGCTATGTTCCGTTCTGAAGA  
AAGCACAAGAAGAGTACAGGAGGATGAAATTGGCCCTTGATCAAGCAAAGGTGACAGTTAATC  
TATACATTTTATTAATCCTAAGAGGATTTGGTCTTGCATGTTTTTCACTTCTAGAATACTCCTTTGT  
GCAGCTTGAGCGAGAATTCGAACGACTTCTTAGTACTGAAGTTGACATGCAACTGAAGACATAG  
ATTACCCAAAAAGATTCTAAATTTGGGATGCAGTATCCAGTAGATTTTGTAAAGTCCCCCTTGACT  
CTTTCAGACTTTCTTAGTATCCTAGAATGGGTCAATTATATAAAGTTTTTCATCTGTCATTGGGCTCTC  
TATGGTTGTAACCTTCTGATGCAAAGATACTGTGCCACCCCAAAGTTAATATACAGAATACTAGA  
ATAGTTATAGCTATAAGCCTGGTCTGGGGATGGTAATGGCTTCTTCGTTTTCTTTAACTCAAAAAT  
AGCAGAGGCAACCAAAGATCAGTGCATTTTTTTTTATTATTATTTATAGGCGCCAACACATCTTC  
AATATTAGCCCATATTTACAAAGATACTCTTTGTTTCTTAAATCACCATATCCAATATCAGTTATC  
TCTCTAGATTAATGATAAAATTTATTATATGATACTCCCAATATTATGTTAGTTAAAATTTTAAAT  
CCAAATTCAAAACAAATTGTAGCAATATCAAAGAGCACGAGATAATCCAATGTCATTTCAATTGGT  
GTTATTTTTATGGACACGGTTATAATTCTTAAGACTATAGGGTTAGATAGGGATGAGTAAAGTTTG  
GTCACAATTTTAGTGGCTTTGTTTCTATATGAAGCTGCCTTGGTAGTGCCTGCTTCC

>Glyma.07G242000 (GmCAMTA13)

GTAAGAGTCAGACTGTAGAATAGAAAACAGAAAGGAACAAGAAAGAGTGTCAATCAGCTCCAA  
CGAGGGGATCATATTTCTATCGGTTCCAATACGAACAGACCCACCCTTCTCTGCAATTAGGTA  
CTTACCACCTTTTTCTATTTTTTCTCACTACCCTTTTAGTTTCTCATCCTGTTTCTGATTTCTTTAGTT  
GAGAACGATGATTGTTTTCTTTATTGAGTCGTCACCTTTGCTCTTGTTCATTTTTCATGTAATACGC  
ACTTGCTGAGTTTTAGGTGGGAGAAAAGTTTTCCGAATTTCCGAAGGTTTCTGTGAATATGGCGA  
ATAACTTAGCGGTGCAACTGGTTGGTTCAGAGATGCATGGATTCCACACATTGCAAGGCACGTAC  
TTCACTGTTGGTCTTTGAATTATGCCTATGTTTATTTGATCAAATGACTAAGATGCAGTTTTTTTT  
TTTCTTATCGATAGGGTAATTTATATTAATGTTGTGAGTAGTACTAGATGTTCAAACACAATGTC  
CTGATATTTAATTGGAACCAAATGATTTTACATAAGATGGTCCCTAGGTTTGATAAATTATCTGA  
TAAGCCTACTATTGTATGGATGATAATTTTGTCACTGGTGGGAGAGGTCAGCCCTTTAAGTGG  
TCATAGAACCTTGTGGGATTAGTCTTTGGTTTTTGGCTGGAGGATACCCCGTGTTTACAAAAAAA  
AAAAAATAGTTTTTGTAGGCTATGTCAAAGGGAAAGGAAACTAATGAAAGAATTAACCTTCT  
CTGTTTATTTGTTGTTCTGACATGTTTTCTTATATATGCCCCAGATTTGGATGTGGGGAGCATTATG  
GAGGAAGCAAGAACCAGATGGCTCCGTTCCAATGAGATTCATGCCATGCTCTGTAATTACAAGT  
ATTTTACCATTAATGTCAAGCCAGTGAATTTGCCAAAAAGTAATTATCATTAGCTGCAACTTGAT  
GTTTCGTGAATGGATATGCATCATATCCATTCTGCTCTATCGTGCATTTTCTTATAGACAATGTGTCA  
TCTCATCATATTCATTTGTGCTGTTATGTCTGCATATCTTAATTTCCATAAACTTTTGGAGCTTTTG  
TGATCTAGCTTGTTTTATAAATTGTGAGCTTCTGTGCCCTTATTGCTGGTTTAAAATTTATTTAGTT  
TGAAGTTTCTATTCTTAGGAGGGATCTATTTTCTCTAATCTCTTTGTAATCTTCTGCTTTTACTTTA  
ATGATTTTCTTATTTCAAAAAAATGCACCATTTATTTGTATATATCATGAATAAAGCAGGATAA  
GGTCTCACTGCGAGTGAATTTTCAATTCATGGAGCTAATAGAATTTTGATTAGTTATTTTGCATCCA  
AATAAGTTTTCACTATTAATGATTAGACAATGTCAAGTATCTGGTGAAAATATTGTTGTTGTTATA  
ATTATTGTTATTTTGTGTGTCAACAGGTGGTACTATTGTCTTATTTGACCGCAAGATGCTTAGGAA  
CTTTCGAAAAGATGGGCACAACCTGGAAAAAGAAAAGGATGGGAAAAGTAAAGAAGCTCA  
TGAGCACTTAAAAGTGAGGATTTTCAATTTCTGTTTGTTTTTTTGTGTTAATTTTTTATTTATTTT  
AATTTAGTTTCTTAAACATATTGTAGATAGGATAATTTATCATTTTTTGTATGTGGAATATGAATG  
AATTAACACTGACACAGAGATGAGAGGGTATAGCAAGTAGCCTGACAAGCATTACATGTGGTT  
AAATCTTGAAAGACATAAGGCTTCTTGGAGCTCAGTTTTCTATTTTGCCGATTTTATTGATGTTGTT  
CAATTCATTGTGCTTTCTCTATAAATAGTATTTTTTTTTCTTTTAGGAGAGTTTTGGTGTTTAGTGG



GTTTAGATATTGTCCTCTGCTAGATCTGTAAGTGCTGAAGTATTTAACTGGTGATGTTTAATTTATA  
TAAGGCATTATCTTGGATTTGTATGTCATATACGATTTTTGTACAATGATCGAGTCACATATCTAT  
CATTATTTCTGGGTAGTATTTGGGAAACAGATCAGTTTGTGGCTTTCTGCTTTTAATTTATCATCA  
AGTTAAGTGTTTATTCTGTATGATCATATAATTCCTTCCTCCAGATTTTGTATTCTTGATTCATTAG  
CATCATATCTGATTTTTGACATTCCTTCTGGTCATTTTTTTTTCTTTTCCCATCCATCAGGTTGGTA  
ATGAAGAAAGGATCCATGTATATTATGCACATGGCCAGGATAACCCAAATTTTGTCCGAAGATGT  
TATTGGCTGCTTGATAAGTATGCATGTCAGCTGTTTCTTAAAGCTCCAATTCCAAAATTTTATGCA  
TGCTCATACTGCTGAATTATGTTGTAGTATGGTGCTTCTGTTATTCTTGTATATATTGGTTAAAGTA  
TAAATTAATAAAGTTTGTACTTGTCTAATAACAATGTGACTTAAAATTGTTTTCACTATTTCTTT  
TCAGGAGTATGGAACACATAGTCCTTGTTCATTACCGTGAAACACAGGAGTTGTTTTCAGTTGTT  
CACCATTTCTCTATTTTTTTTTCCCTTTCAAAAGTTCAATTTAACGTCACCAACCATGATTTATGTG  
TGTCATGCGTATGTTGTTTTGTCTGGAAGAAAGACCATATACATACATAGTCATTAGTCAGTTTGT  
GATTTACTGATTTTTAGCCTTTTGAACATGTCTGGATACGGCATCATTATGTCTATAAGAAAATTT  
CATACAGTGAAAATGTTTTTTCAGTTGGTCTGGATGAAAACCTTCATTTGTTTTCTGTGTATAGTGCA  
CAGGCTCTTTCATTTTGGGTATTGTGAAGCAGCTGTGTATAGTGTGTTTTCCATTATGTGTTGAA  
AGGATATCCATGCCCAACAAATGGATTTATACCAGTTTTGATGATGGATAAAGCTCCAAAAGTT  
GATTGTAGGACAGGGGAAAACCATTTTTTGTTCAGTCCATTGGTTTTGTCTTATTTCTATGTTG  
GACGGATATGCTGTGGAATGGCAAATATTAACAGAGCCATCATTAGTAGGAGCATGACGGCTT  
ATTAGCTTGCATTAATAAATGGCCAAGTACAGCATTATAGATTCTATTGTATAAAACCCCTTTTTT  
TTAATGAGCTGTTAATGTGAATTGGTCTTTAAAAGTCGACAGTTTGTATTGTGCTGCTTTGCTTA  
AATATACTCCAGTTTCTTTTTACTTAATATTTGCCTAGAGTTGGAGTCTAATTTTCTCTATTGTATTT  
TTTTCAATTAAGGGGTAACCCTGTGGCTTTTGTGGCAGAGGTGACCCATGCCATATCCCTGGAA  
AAAATTTAAGTTTCAAAGAACCCAAGGTTGTTTTCTTGCAATGATATTAATAAAGTGTGTTGCTAATAT  
AGAAGTTATATCCCCTCATTGTTTCATTATGTTGAAAAGTACATTTATTTCTCCTTCCAGTCTTCT  
TTTAGCATTTTAGAATAAAGTTCATTTTTTTTTCTCTCTATAAAACATAAAAAGTAGTTTTCAAAAAA  
TGCTTGTCAGTGCTAGGCTTAAATCACTTAGTTTCTCTTCATGAATGACACTTAGCAGTTAAAAACA  
TCTTTATAAATTAGATATAAACTCATGTTTAAAGGTGACATTTGTGCTCTAAAATTTGATTGTGAAAA  
TGGATATAAATTGGCTTTGTGACATTCCTTGGGTGTTGTTTATGATACAGATGCAAGGTTCTCCTG  
TCACTCCTGTAAATTCACACTCCAGTTCTGTCTCTGATCCTCCTGCACCGTGGATTTTATCAGAAG  
AAATAGATTCAGGAACCAACTGCATATACTGGTGGTGAGAAATAATTTTTATATTTGTGGTCT  
ATCTTCTTAAAAGTTGTAAGTGTGTAAGCTATTAATATGTAAGGCTAATGAATAATGACATTTGTT  
TAAAATATTCATATTTTAAATTTTGAAGATGTTAAGTGTGTTGTTTGGAAACAGTGAGAGGCAGGATA  
ATGAGTTGCAAGAAAAGAACATGTGTCATGTGCATGTCTTTATATATTGCAGATATATTCCTTCTA  
CCTCATTTCTGCTCATCTTTCCAAAGGAAGCAGAAAATAATATATTTTTTTTTACCAAGGGAGTCTA  
GCTCAGTTAGTTGAGTAGGGTGCCTGAGTTGTTATGAATTCCATGGTACCCATATTCGATTCCTAT  
GGATAAAAAAAAATAAGAATTTTTTGTGTTTATAATGCTGTGTATATCTGGTTGTTTAGTTGA  
TGCTTTATTTTATGAAAAAATAAAAACGACTAAATAAACTATTACTGTAGTTGTCTTTACTTGA  
TAAGGTGTATAATTTACAGCCTTTCTGATTTGGACAAAAACAGACATGAGTAACAATATAAATGTC  
AAAAGTCATGAAGTCAAGTTCATGAGATTAATACTTGAATGGGATGACCTAGTGGACACAA  
ATGATCATAACGCCTCTACTGTGCCTAATGGAGGTAATGGTAGTTGATTAAGCACAAATCAGTC  
ACTTGTCTGGATTGCACCATATATTTTATTATAACTTAAAATTAACTTTTTGCAGGCACTGTTCCAT  
ATTTTGTATCAACAAGATCAAATTTTACTGAATGACAGTTTCCGGCAATGTAAGATAAATATTATCTTT  
CTTTTATTTGTATTCATGACTCTTTTTGTTTTCTTTTTCTCATTTGAGTTCTGTGATGGACAGTTAGTT  
CTTTGACTTTTTTTTTTACCTGGGAAATAAATTTTATTAGAGAGAAAATGAGTGAAGCACTGGAGA  
ATAACTAGGTGGAGGATAAGATATCCTCTTTTCTAATTTCTAATATTAATAATGGAAAGGTCAAG  
AAAGGAGAAAGATTCCAAGATGCAGCAAGGCTATTCAATCTCTTTGCATGTTGATAGTGAACACT  
ATCATGAAATAGCCATGAGAGAAGCCAAAAGTACAAACCTATCCTAAAGCAAACCAAGGGGTC  
AAGAGATCCTAAAATTGCAGGCATCCTTCTTCAACCAAACAGGCCAAAGAAGTGCAAAAACTGC

AGTGTCACAACCTTTTGCCTCCTGATTGTTGGTCCTTTGAAATTTATCATAAGACCATTTTCATCCTCT  
TTAAAGTATATGTAATAGAGATTTTATTATATTTCCCTAGACAACATGTTTTATAGATGTTTCAGTCAT  
TCAGCATCCAGGACATCGGCATTTAAAGTGTCTTTTTGACTATTATATTATTGTTTCATTATACATG  
CTTAGGAGTTAAGATGCCATTTTACCTTTGTGATACTATTTTTCAAATCACCTGTAATCACATAAA  
AAAGGCCACAGCCATTTTGAAGAACAGGCCTTGAAATTATAGTGAAGCAAATACTTATTTTTACT  
TATTATACCTCACTTATATCATTTCCCTTACTTCCCTCTTCCCTACTTCTTCCCTTTTTTTCTGAAGATAC  
TTGCTTTTTAATAGCCGCTGCTTTGTAATACTTGTCTTTGTCACCAGGTAGCCAACAATCTATCTGCA  
GAAATTCCTTCTTTTTGGTAATCTTACTCAGCCAATTGCTGGGAGCAACAGAGTTCCTTACAATTTT  
TCTGAAAGTGTTACTCTTCAGACGATGGACAATCAAGCAAATCCACATGAGCAGAAGAATAATA  
CAGTTTCCCTAAGTGGTGTGATTCCCTGGACACTTTGGTCAATGATAGATTGCAAAGTCAGGACA  
GCTTTGGAATGTGGGTGAACCACATCATGTCTGATTACCATGTTTCAGTAGATGACCCAGCTCTTG  
AATCACCAGTTTCATCCATTCATGAACCATATTCGTCTCTGGTAGTGGATAGTCAGGAATCTTCTC  
TGCCAGAACAAGTATTTACTATCACTGATGTATCCCCTACATGTGTATCTTCCACCGAGAAATCA  
AAGGTTTCCCTTGGCCCTTCTGTAGATCTACTACTAGCAAATATTATCTGCTTTAAGCATATCTTT  
CTTTAACAGTTAACTCTAATGTTTTATTTGGTTTCTTACTTCTTAGTTGATTCCGTAGTCTTTTTATTT  
AATCTTGATTGAGTTCCTGTTGAATTCATAGCTGTAAACTGCAAAAATATAAACTCCAAGGATT  
ATTTTTAGTTCTTTTCAATCTTGCCAAAATCACTTTTAAATTGGTGTATGAGTTGCTCTTTGGCTACA  
AGCATGCACATCTTCATGTATACAAATTGTAACAGAATTTAACTGAGTACATACTTGCTGCTTGAT  
GAATTCATATGTTTGCTACCTGTTATTTTGACTTTCTGAATTCCTTTACTTGCAGGTCTGGTGACT  
GGATTTTTTCTTAAGGACTATATGCACCTTTCAAAGTCCAATCTATTATGTGTCTGTGGTGATGTTA  
GTGTTCCCTGCAGAAATTGTTTCAGGTTGGGGTCTACCGTTGCTGGGTATCACCACACTCTCCAGGAT  
TTGTGAATCTCTACTTGAGCATTGATGGCCATAAGCCTATTAGCCAAGTTGTTAATTTGAATATC  
GTACTCCTGCTTTGCATGATCCTGCAGTTTCAATGGAAGAGAGTGACAATTGGGACGAGTTTCGA  
CAACAAATGAGGCTTGCATATTTGCTCTTTGCTAAACAATTGAACCTTGATGTTATCTCCAGTAAA  
GTATCACCTAATAGACTTAAAGAGGCTAGGCAATTCGCCCTCAAACATCATTTATTTCCAATAG  
TTGGCAATACTTAATCAAGTCAACTGAAGACAACCAAATTCCATTTTACAAGCAAAAAGATGCC  
CTGTTCCGAATTACATTGAAAAACAGACTAAAGGAATGGCTTTTGGAAAGAATTGTTTTAGGCTG  
CAAGACTACTGAATATGATGCTCATGGCCAAAGTGAATCCATTTGTGTGCAATTTTGGGATATA  
ATTGGGCTGTTTCCTTATTTTCATGGTCAGGCTTGTCAATTGGATTTCCGTGATAGGTTTGGATGGAC  
AGCTCTTCATTGGGCAGCATATTGTGGAAGGTATAATACACAGACATCCCCTTGTTTAAACCAT  
TAGCCCTTCTGTAACACTACATTGACCTAACAAATCCTTTTTTGGCATGGTTTCACCATTTCATGTTCTTT  
TCTGTTTCTCTTTTCCCTACATAAAGGTGAACATTAACATAATCAATGTGGATTTAGAATGATGTT  
GGGTAAAGTAGACTGTTTGAACCTTGAATTTAAATTTTCTTATACATTTGATTTAATATTTGTATCT  
TCAGGGAGAAAATGGTTGCAACTCTGTTGTCTGCTGGGGCGAAGCCAAATTTGGTCACTGATCCT  
ACTCCACAAAATCCTGGTGGATGCACTGCTGCTGATCTTGCTTATATGAGGGGTCATGATGGCTT  
AGCAGCTTATCTTTCAGAAAAATCTCTGGTTCAGCACTTCAATGACATGAGCTTAGCTGGAAATA  
TCAGTGGCTCACTGGAAACTAGCACGACTGATCCAGTAAATCCTGCAAACCTTACCGAGGACCA  
GCAGAACCTGAAGGATACGTTGACAGCTTACCGAACTGCTGCTGAGGCAGCTTCCCGCATACAT  
GCTGCATTTAGGGAACACTCTCTAAAACACTGAGAATAAGGCGGTTGCATCTTCCAATCCAGAGGC  
TCAAGCACGCAAAATAGTTGCAGCAATGAAGATTCAGCATGCCTTTAGGAACCACGAGACAAAG  
AAAATGATGGCAGCTGCCGCTCGCATTAGTGTACATACCGTACATGGAAGATTTCGTAAGAAT  
TTCTTAACATGCGTCGTCAGGCTGTTAAAATTCAGTAAAAGCTTCTTCTTAGTTGGCACATACC  
TTAACAGCAGATTTTGTGGGCAAATTGACTAACATCTATGTTACAATGCAGGCTGCATTCCGGT  
GCTTTCAAGTTCGGAAGCATTATCGCAAAATCTTTGGTCTGTTGGTGTGGTTGAGAAAGCAGTGC  
TGCGTTGGCGTTTGAAGAGAAGGGGCTCCGTGGTCTCCAGGTCAAACCTGTCGATGCGGGAACC  
GGAGATCAGGATCAGCAAAGTGATGTAGAGGAGGAATTCTCCGGACTGGTAGGAAGCAAGCC  
GAAGAACGTGTTGAGAGATCTGTAGTACGTGTGCAGGCTATGTTCCGTTCGAAGAAAGCACAAG  
AAGAGTACAGGAGGATGAAATTGGCCCTTAATCAAGCAAAGGTAACCTGTTAATCTATACATTTA

ATTAATCCTAGGAGGATTTGGTTTTGCATGTTTTTCACTTGTAGAATTTTCCTTTGTGCAGCTGGA  
GCGGGAATACGAACAACCTTCTAGTACTGAAGTGGACATGCAACTGTAGATTTTGTAAGTTCCCC  
TCGACCGTTAAGACTTCCTTAGTATCCTAGAATGGGTCATTATATAAAGTTTTCATCTGTTATTGG  
GCTCTATGGTTGAACTTCTGATGCAAGGATACTGTGCCACCCCAAAGTTTAATATACTGAATAC  
TAGAATAGTTATAGCCACAAGCCTGGTCCGGGGATGGTAATGCTTCTTCGTTTCTTTAACTAAAA  
AATAGCAGAGGCAACAAAGATCAGAGCGAATTTTTATAATTATTATTTATAGCCGCCAACACAT  
CTTCAGTATTAGCCGATATGTACAAAGACACTTTTTGTTTCTTAAATTACCATATCCAATATCAGT  
TATCTCTTTAGATTAATGATTAATTTTATCATGATACTCACCGATATTATGTAAGTTAAATCTAAA  
TTAAAAACAAATTGTATCAATATCAAAGAGCAAGAGATAATCCAATGTCATTTGATTGGTATTTT  
TTACGGGCACGTTTGTAAC

>Glyma.11G251900 (GmCAMTA14)

GCTTATCCATAAAAATTTCAAACAATAATTACAATACATTGGCATTATAAATATTCATTATACTA  
CCATCGATCTAATCCGCCTCGAGCAAATAAGTTCATGGACACAATTGTTGTCCTTCCACCCACAT  
GGAGGAATAATTGATTGGATTTCTATAGTTTCAGATATAGAAAAGACGATTATTATTAAGTTCTTA  
CTTCTTAGTGTGTGTGGGCACCATTAAGTTCTGCATGATTCCAAGACTGACGTGAGCAAGAAA  
CAATAAGATGAGTTCTGAATTCTTGGGCTAATTTGACATTGTCATGGCAGGTTTGGAGTACAGCA  
TCGATGATCTGTTTCAAGAAGCTAAGAGGAGATGGCTCAAGCCTGTGGAAGCTCTTACATTCTA  
CGGAATCACGACCAGTGCAAGTTCACCCACCAGCCCCCTCATCAGCCAGCTGGTAACATAACAT  
CCTGTGTTTTCTTTGTTCAAATGAAGGACAGGTTTTTCCGATTATCATAGGTTACTGATTGTCGAAG  
ATGTTGCCTATCCACTTCTTAAACAGGTGGATCCCTGTTTCTGTTAATCGTAGAATCATGCGTTCC  
TTCCGTAAAGATGGTCATAACTGGCGGAAGAAAAAAGATGGCAAACCTGTGGGAGAAGCGCAT  
GAACGGCTTAAGGTCTGTTATTAGTGTCCGTGGTGTGTGATAATTAAGATTACCTACAATGATCA  
TTAAAAGGTTTACATGAGGGTGAGGCATGGTGCAACTGCATGTAGGTCTCAGGTTCAAATCCTA  
GAAGTAGCCTCTTACATGCGGTGATAAGGCTACATGCATCTACCCTCCCAAACCTCTCCAAGT  
GGAAGCCTTGTCTACTATGCTGTCCTTTTTCTTTTTTTGACATCTATTTGTCTTGCTGCAGCTCATG  
TCAGCCATTACCATCTTGCCAACTTTTGGCATGCTTTATTTTTATGCAAATGCCCAATTTGCACT  
CTAATTTGGACCAAGCTCCTTCCTTTCTTTAGTCTCAAATAAGAACCATGCAGAAAAAATAGA  
TGAAACATAACAATAATTGTACCATACTGAGAGCTTGAAGTTTTCATACCAATGGAAATTATACGT  
TCTTCTACTTCACTTCTTCTTCTTTTATTTATTAGAGGAAATTGAATAATAAAAATTTGACATTGTT  
GCTGTAATATCTTGATGCATGATGATTTCTACTTGGATTTTGTATTCTTCTTAAATTGCAA  
AAGTCTGCTAATGTTTCAAGCAGGTCTGAGTGATTAATACAGTCCATAAATGTAATAAATTATT  
AGGAAGAAGTATTCAAATCTCAGACATATTGAAACAAAGTATTAATCGAAAATAATTAACGATC  
CTCATTGGAAATTTCATTTTCAAATCTATCTCCTAATCTGCTCTGTACCATATATAGCTTCCAAA  
AGCTTTTGGGACAAATAGTAAGTTTTTTTTATCTAGCACTCATTTTGTGCATGAGCTGTAACAGAA  
CATTGAGATGTAACCAATTTGTTGTTAATAGTTTTACTGGTATGGAGCATTTTTCTTTTTAAATA  
TAATTCATTATTTTTGCTATATTGATGCCTTTTGTGCCAACATTTGTTTTGCGATAGAATTCTATGT  
ATTGATTTTCTCAATCTGATTGGTCATTCTAATCTGCATGTTTAGGTTGGCAATGTTGAAATCCTAA  
ACTGTTACTATGCACATGGAGAGGAGAACCGTACTTTTCCAGAGACGGAGCTATTGGATGTTGGAG  
CCGTGAGTAAATTTAACTATTAGCTGGATACCAACCATATTATTATGTTGCCACTAGTTGTATCT  
TTAAGATCCACACACAACTTACAAAGGTATATTAAGGGCACTTTATTACCAAGATAAAATTA  
TCTTGACTGTGAAACAAAATCAACCTTCAGTATATGTAATAATTAACATGGGTTCAATTTATAT  
GCCAATATGTTATTGTAGTGCATGTTTATTTGCTCATACTATTGTTTCTTGACAGGGAATATG  
ATCATATTGTTCTGTGCATTATAGAGAAACAAGTGAGGTGAGTTTCCAGAACATGATATCAGAT  
AAACATAATATAGTATTTGCAGTTTATTATGTGTGAAAAGGTGGGAATCCTTTTTAAGCAACACA  
TCTCAAAGAAAAGTATGTTTCTATTTTTGTTTCTTGGGAATTGTATCAACAACCCAAAGGTT  
GAGTTTGACATTACTGTTTACTCTCACATTTTGCAGGGGAAATCCAATTCTGAGCATGTCACACAA

TTGCCATCAGGTTCTCCTGCTTTTAGTCAGAGTCATAGCTCGTATACTGCTCACAACCCAGGA  
ACAGCATCCATGATTGGTGATTCATGTGAACCTAATCAGAATTTTTCTTTTCTGGGTCTTAGAA  
GTTACGTTTCGAAGCACAAGCCTTGCGCCAATTGGAAGAACAGCTGAGTTTGAATGATGATGGCTT  
CAATGAAATTGCACTTGATTTAGTGTCAAGTCAAGATCAAAGGGTGGTTTATAAGCAAGATAAAT  
CTGCAGCTTTGTCTGGACCAAATGATCTAGGACAACCTTGTGATGGATATAATGGAAGACAAGGT  
AATTTAGACAAACTTGAGCTGTTAATGTTTTTTTTGGAGCGGGGAATAAAATTAATATATGTTTG  
AAGTTAGTGAACATTTGAATTATTATCCTATTTTACGCTTTTATCTTGTATTGTGTTTAGATTTGTT  
CAGTTATAGATGCTTGTCTTACTTACGCAACATATGCAGGTGGCTTCTTCCACCCTCACAGCTA  
ATTTATAACATACCTACTTATTTAAGTTCTCTAAGGTTATCATAGCCATATATATATATATATA  
TATATATATATATATATATATATATATATATATATATATATATATAGATTATATCTTCTATTCTT  
CTAATTTGTCTATGGTACCCTTCTGTTTGATAGATTTTCTTTAAGTGAAACTTCCCAATTGTTATA  
TGCTGGTTGTTTCATGTGAATCTTTTAAAAGAGAGTGTAGGGAGATTATTGTGAATCAGGTAACC  
AGAAATCAAAAAGGTTTGAACAACAAAGCCTCACAAATTAGGTCTCTTGTATCTAGAATCACTCCA  
GGAGGCATTCAAGAAATCTTCGTAAAAAATATATTAACCATGCAGCACAGTTTTCAAATATTTA  
ATGCACAGAACTCTATGTGTTAGATAATATGTCAATGTTGTTTATCCTCTTTTGTGCTTGAGAAATT  
AAATTAAGGCAATTCTAGTTTGTATTATTCAGTGAGTTGGGTTACAACATGTGTATCCATATATA  
TACAAATAAAATGTTATCTAAAAGATAAACCAATCTTATGTAAAAGTTAAACTGGTTATCTAATC  
TAATCTTCTAAAAGATAAACTACATGTCTGATTAATAATTAGCACTCCCCTAGTCCCCTTAAAGTTG  
GAGCATATATGCCTTGTTACATATGTAAGTTATCCTAGGACCTCATAAGGACTTAGTCGATATGA  
CTGCAAGTTGTTCTTAAAATTCACAATGGTAGTCTTCATGATGCCAGGAGGATCTTTTCTCTAAT  
GAAGCAACAATCAACCTCTATATGTTTAGTCCTTGTGAGAAAGATCAGATTGGAGGAAAGATGCT  
AAGCTTGGTTGCCACAAGCAAGTCCATAGGACCTCACAAAGTAAATGCTTTAGCCATAAAAAATC  
ATAAGTCATATTAGCCATAGCACGATATATTGCTTTGGTACATGACCTTGAACCCACAGTCCGTTT  
CTTACTTTTTTCGTGAGATTAAGTTACCACTGATGAAAAGATAAATTGCATATCTTATTACAATCAA  
CAAAGTGTTTCGTTGTAAATTAGTTACTCATGATCCACTCAACTTTTTTTTTCCCAAAGTGCACATT  
CAGCTTTAGATCAGACTCAATTTATTTCACTAGATCTTTATAGTTTGTTTTTGCTACTCCTAATTAT  
AATTAACAACAAGTGTAAAGAGAGGAAAGCAAAATCTTCTGAAATTATTGTATTTTCTGTAGAT  
GACAGTGGCACATATTATCATGATTTTCTTGATGATTGCCTGGTGGAAATGAAAAAAGTATATA  
CTGGACGAAAGTGCTGGAATCGTGTAAGCCCTTATCTGTGACCAAATTACCAGATCAACATGCAT  
ATGAGGCGATTGGAAATGTGAGTATCCAAAGATATACTTCATGCTGTCAAGAGTTTATAATACA  
TTTTTCTTTTGCAACTTGCAAAGAAATAAAATCTCTATGCTTAAAACAGGAAAATACATTATTTTC  
TTCGGGAAGGGGAGTGATTGCCAACCTGGAAAACAATCAGTGGCTAAACTCCAACAGTAATAAT  
ATTGAAAAGTGTATGACTTATTTCTACCTTAACTTGCTTGATGATTTCCCTTTTTTGCATATAATG  
AAACTTCTTCCATCTCTCTTTGATGTTCCATATCACTTGCTGTTTTATTGTTTCTCAAGATGGTGGG  
GTCAAATTTCCACCATATTCTCTAGCAGAACTCCAGGAGCTAACTCTGACTACTATGAAACATT  
TTTTGACCAATCCAAAATCAAGGACCTCTGGGTGTAGATTCAAGCTTGACTGTTGTGCAGAAAC  
AGAAATTTACCATTAGGGCAGTATCCCCAGAATACTGTTATTCTACCGAGACTACAAAGGTTTGT  
GCCTTTTAATTTCAACACTTACTATGTCTATTAATGATTTATCACTCTTTCAGTACTAGGGACTGTTA  
TCTGCCGAATGATGGAATTGTTATTGTTTTTGGTGCCTACTGCTCAGCTTACCTATGATGTTCTT  
GAAGAGCTTTAAAATGCATACACAACATGGTTCAAATACGTATGCATTTTTTGGTATAATGTAATT  
ATATATGTAATAACTAGGGAGTTAAAAGGCAAGCTCTTAGCTTTTGATTTCAATACTTAAATCATT  
TGGGACATATACTTTGTGTCTACTCTTTCCGTTTGAACTTTTATTATTTTATTTATGATATGATAC  
AAATACTATTGATTTTGTCTATATTTGAATCCTAATTTCCCAAGTTATATTATCATAGGTGATCATTAT  
TGGGTCATTTCTTGCATGACTCGGATTCTACCTGGGCCTGTATGTTTGGTGTGTTGAAGTTCCT  
GCAGAGATAATTCAGGACGGCATAATCTGTTGTGAAGCTCCATCCAATCATCTTGGAAAGGTTAA  
TTTGTGCATTAATTCAGGAAATAGGGTGCATGCAGCGAAATGAGGGAGTTTGAAGTTTTCGAAATA  
AGACTACTAGTTGCACTCGCTGTAATTCATTGAAACAGAAGGAAGCAAAAGTCTGAAGATCT  
GTTATTACTTGTTCGATTTGCAGAGATGCTCCTTTCTTCTTCAACTACAAAGGATGACAGAATAGA

ATCTGGAAGTCATCTTTCAACAGAACAGAAAGATGATGATGATTTCGTGGAGCCATATTATAGAC  
ACTCTTCTAGATAGCACTAGAACACCATCTGATGCTGTTAAATGGCTTCTTGAAGAGCTGCTGAA  
GGATAAGTTGCAGCTCTGGCTTTCTAACCGAAGAGATGAAGGGACGGGCTGTTCTTTGTCCAAGA  
AAGAGCAGGGGATAATACACATGGTTTCTGGGTTGGGTTTTGAGTGGGCCTTGAACCCCATTCTC  
AGTTGTGGTGTGAATATAAATTTCCGTGACATCAATGGATGGACCGCTCTTCATTGGGCTGCACG  
GTTTGGGAGGTAATAGAAAAGTATTGTTGATATTGATGTGCAATTGTGATAGCATTTTTGTTC  
AAAGCCTTGAATAATATACACATGATCAAATCTACTTAGAAACCTTTACTTTATCCTTGGGAGAA  
GGGAATACCAATGCAAAGAAAGAGAACAAGGAGGACAAATAAAGCCTGTATCAAATACCTGCC  
CAGTAACAGTATGCTTACATGCAACAGGATGTTTCAATCATTCTTGAACATGTATATAAAGCCT  
AATCAATCAAAGCCAAATGTTTAGTTTTTGTTCACAAAAAAGGCTTTCCCCACCATATGGGA  
TCGGCTACATTAATTAATAACAACATTGTGTTGGACAAAAACTGAATTTAAGAAATTCATT  
TAAATCGAATTGTTTTAAACCTTTTCTCTGGAGTTTTCTTGGTCTTCCCCTATCTCTATTTGATCA  
GACTGTACTCCATATAATTAATTCGTCTTACCAAGGCATCTATTGGTCTTCTAGCATGATCAAACC  
ATCTTATTAGACCAAATTCTGACATAAATGATCATATCAAGATTGAAACTCTTGCTTTAAAAGTC  
TTTATAAATGATCTGTTCCATTCTAAGTGTCTGGAAATTCAGGTCCTGAATATTTTGTTCATGA  
TAGGGAAAAAATGGTTGCTTCACTTATAGCTTCTGGTGCATCTGCTGGAGCAGTGACAGATCCAA  
GTTTACAAGATCCAACCGGTAAAAGTCTGTCATCTATTGCAGCCAGCCATGACCATAAGGGTCT  
GGCAGGTTATCTTTCAGAGGTAGACCTAACAGCCATCTGTCTCCCTCACATTGGAAGAGAGTG  
AGCTTTCTAGAGAATCTTCTGAGCTTGAAGCTGAGTTAACTGTCAGTAGTGTCTCTGAAGAAAAT  
CTTGTGGCCAGTGAGGATCAGGTTTCACTAAAAGCTTCTTGGATGCTGTTAGAAATGCAGCTCA  
GGCAGCTGCACGGATACAAGCTGCTTTTCGTGCACATTCTTTTAGAAAACGGAAAGAAAGAGAT  
GCTGCCGCCACAGTTCTAGATGGATATTGATTGATGCAGGTAGCATTGATAATAACATTTTCACT  
GCTTCTGCCATGTCAAAACTTAGTTCTCAGAGCTGGCGTGATTACAAAGCTGCTTTGTGCGATTCA  
GAAGAAATATCGAAATTGGAAAGGTCGTATAGAATCTTAGCATTGCGCCAGAAAATAGTTAAG  
ATACAGGTAAGTGAATAGAAGTTGTTATTACAGTTTTGCTATACCAATTGAATTCCAAGAGTTCT  
GTATGTACCTGGACATAGGCACTGTAGAAATGTAGGTACTTTGTAATGTAAATAAATAAATAAAT  
TGTTAATAAATTGGAAGGAGGGGGGAGATAAAAGACATAGCTAGACATGCACATGCATATATCA  
AGAATAACCTTGGCTTTTCAATATTTATTTGGGCAGGCTTGTGTGAGGGGTTACCAGGTTCCGAAG  
CAATACAAGCTAATATTATGGGCAGTTGGAATCTTGGACAAGGTTGTGTTACGATGGCGGAGAA  
AACGAATTGGTATACAAAGTGTCCGGCAAGAAATGGAGTCAAATGAAGAAGAAAGTATGATGATG  
CAGATTTTCTCAATGTGTTCCGGAAAGAGAAAGTAAATGCAGCAATTGAAAAGGCCTTGAAGCG  
GGTGCTTTCCATGGTCCACTCCACTGGTGTCTCGTCAGCAATATAGACGCTTGTCTTCGTTGTATCG  
TCAAGCCAAGGTAAATACACTAATGAAAGCAAAAAAGAAAATATAGGTCTGGGATACCACCAG  
TTAGTTAAACCACTTTTTGCATTCAGATTGATCAAATAAATAAGTATTGTTACGAGTATAGCTTTC  
ATAGTCCATTTCTTTACTGAGAGACAAATAAGATAACTGTAACGCTAGCGAGTAGCCACATGATA  
TTCTCTTTGGACACACTGTTATTACTAGATGAAACCCAATTCTGGTGTCTCATAAAATGTTGAAAT  
TTGAAAATCAGAATACAATCTGATCCCATTCTTTATTAGTGGGGCTAGCTGCATGAGGCTTTACTC  
ACAATAAAAAGTGTCAAATAGTGTGTTGCTAACACTTTTCATAAAGTAATTAGGAGCTTAATTA  
ACATGCTAAGCTAGCATATAGCAATGTTTTTTTATGTAAGGAGAGGTTCCCTGTTTTGTGCGATCA  
TAACTTATTGATTCTTTTACAGATTGAACATGGCAGCACAAGTATGAAGCACCGTTATCAACTT  
CGGAAGAGAATGCTTCCAATATGGAAGATGATGATTTGTGTCAATTTTTGGACACCTTCTTCTGGC  
CTTCTAGTTTTTATTTATCTTTGATGATAAATTTCTGGCTTCCCCGCTCATATGGTCTGTGTATTTG  
AATGTCTAGGTTGTATAGTATAATGGCGATGGACACTTCTCTTTTTATGTACAAAATGGGCTTC  
AAGGCTCTGGTGGTATAGGATTTCAAATTCA

>Glyma.08G105200 (GmCAMTA15)

CTTTCTGCTTTTGCAACTTCCTTTCTCCGGTCCATTGTTTGCAGCGAATCTAGCAGCCTCTGCGGTT  
CCAAAAATGCTCTGTGTCCGGTTCTACTACCTGTACTTGTAGCTTTTTATTCCCTCGGATTCAACACC  
ATGACACCTGGTAAACGTGTCTTTACTTTTTCTTAATGTTGTTATTATTATGATGTCTTGTTTAGAA  
AAAGAAATTGGAAAATTGGGATGTTAATGGTTTGGTGCATGTACAGTGAAGTGAATTGAGTTT  
GACTTGGTTTGATTGGCTAGTTGAAGTGAACCACATCACTCGTGACTTTGTATGTCTGTGTGCA  
TTTTGTTTGTGCTGAGATTGGTGCTTCAATAGGGACCATTGAGTTTTGGAATTTGTTTGGG  
ATGGTAAAAATCAAACATTTCGCACTGACAGTAAAGCACTTTAGTATATTCTCTGTAGCATGCTTTT  
TGCAATTTGATTTAATTTACTCAATTATTTTGTCTGCTCCTAACACATTTTGTCTCCAAATGATATGG  
AATATTGGAATAATTGATAGGTGCTGTACTGAGAAAGAGAATTTTAAGATTTTAGTTACATTGTG  
CAGTTCTTATTAATGCATAAAAATGTCCCCGGCTTATCTAATTCTTCTGCTATCAGAAGGTAGAAA  
AGAAAACAATGTTGATGATGATGGGATGGGTCTATATTTTTGACTTATTTATGATGTGGTTTTAG  
GTTACGAGTATGATATTAATGATCTGCATCAAGAGGCTCAAGCCAGATGGTTGAAGCCTGCAGA  
AGTGATGTACATTTTACAGAATCATGAAAAGTTCCAGTTCACCCAAGAGGTCCCACAACAGCCA  
ACCAGTAACATCTGTGTTCCCTTATCCAATTGATTTTAGAAATAAAAATAAATGACAGTTTTTCT  
CATTGTTTCTTCAGAATTGACTATAAAATGCTGATTGTTAACCTTATCAATTGATCTTCTTAACAGG  
TGGATCCCTGTTTCTGTTTAAACAAAAGAATCCTGCGATACTTCCGTAGAGATGGTCATAACTGGC  
ATAAGAAAAGTGGTGAAGAAGTGTGGGAGAAGCACACGAAAGGCTGAAGGTGTGCTACTTGT  
GTCTATACTGTTGATTTGTTAGTTGTCCATGAAAAAGGAAAAGTGTGTTGCAGGTGTCTAGAGGG  
GGTCTCAGTTGTAGAAATGCAGTCCATAAATTAATATGTAAGAGGAGAAAAATTGTTGACTCTC  
CTGAATTGTTAGAAAAAATATATTCATAACTTTGATAGATGTCTCAAACCTGGTGAATGGCGAC  
AGATGGTATTATTAATAAATACTTAAAAATCCTTATTTGAAGTTTCAATTGAAGACTCTCAAGATG  
CTTTGAAATAGAATGATTTGACTATCAGCTGCCCTTATATACAATAGATATAACTTATTTCTGTT  
CAGTGATTATTTTTAGCATGTTTTAAAAACATTATTCACTTATTGTTGCTATATTTACGAGTTTAG  
GCCAACATTTGTTTTGTGATGGTATTCCGTATATTGATTTCTTCAATCTAAATGATTGTACTAATC  
TGCATGACTAGGTTCTAAATGTTGAAGCCTTAAATTGTTACTATGCACGCGGAGAGCAGAACCCT  
GCTTCCAGAGGGCGGAGCTATTGGATGTTGGATCCGTGAGTAAATTTAACTATTAGCTAACTGTA  
TATCCTTCACACCATTAAGCTTATCTCACTACATGTTGTATCCTTTAAAACAAACATGCAATTTTC  
AGGAAAAAGTCATCCTAGAGGTTAACTAAATTTTAAGTGAATTGCCAAGATTAATTTATCCTAGA  
CTTTGAAACAGAATCAGCCTTCAATGTACATAACTATTTGTGTGATATGCTTATATATATATGTTA  
TTGTAATAGTTATTCATAATCACTCATGCTATTGTTTCATGGCAGGGCATATGAGCATATTGTTCTT  
GTGCATTATAGGAACACAAGTGAGGTGAGTCTCCGATACATGATATCAGATGAATTTAATAATA  
GTACTTGTAGCTTGTGCATAGTGTCCCTCCAGAAAAATTGGGGAATCCTTTTGTGCAAGATTGCTC  
ACTGTCCTAACCTGTTTCTGATTAGTTGTTTACACATATCCTTCCTATTTACTGTTACCTGTGAA  
ACTCAAATAATTTAGTTCAATTTCTGTTCCATGAAATTTCAAACATTTTCTGTATTCTTTCATATTT  
ACTTTTTGTAGATGGCTCGTCCAATTGTCAATTAGCTGTTAATATTTCTTGTTTAAGTTTGGTATGTT  
GATTCTTTTATTCACCATTATAATTACTACTGTGTTGTAACCTCCCTCTCCCCACCTCCCCTCTCAT  
TTTCTATTTTCAAACCTTCAATTAATAATGTACATGTATGCTTCCAAAGTCAGTGATTATTCCTAAGA  
TTTGTAATGTCCTGTTGCTTTTCTGCACTAATTGTTTCATTTAATGGCTTTGTGCCTCAAATAAAGA  
TATACTTAAATCTTGTAAAGAATCATATTTGATATCTTGGGCGGAATTATTAGATTATATTGTTTTA  
TTCTGTGTGTGCATAGGAACATTGTTGGGCAGCCATCTTTGAGTTTTGCATTAATGTATGCACTCT  
CATGTTATAGGGAAAGCTAAGTTCTGGAGCTGGGGCACAATTGTCACCAAGTTCTTCTGTCTATA  
CTCAGAGTCTAGCCCATATTCTACTCAGAATCCAGGGTCAACATCCATACTTGGTGATTATAT  
GAACCTAATCAGAGTTTCTCCAGTCTGGGTCTACAAAAGTTACATCTGAGATATTCGTTCTGAA  
CAATAAAATGGGTCACATGGATTGGGCAGATACAGAATCAGGAACCTCATCTGAACTCGAGGTT  
ACTCAAGCTTTGCGCCGATTGGAGGTACAGTTAAGTTTGAATGAGGACAACCTTTGAAGATATTGT  
TTCTTCGGCAGTAAGCATGAAACTGTTTCATGATTCAAATCCCAAGCACGATCAAAGGGTGATCA  
GCAATCAAGAGCAATCTGCAGCTTTCTCTAGACCCGATGATCAAGGGCTATTTTATGATGGATGT  
AATGGAAGGCAAGGTAATTAACAAAAGTGTATCTGTTGAGAACACATGGTTTTAATCAGTGAA

ATATCTGAGTGCTTAATCTATATTGTGTTTTAACCTGTTACATACAGATATCTCTGTCTTCTACTT  
GTTTAACTGTGCTTGCAGCATCTTACACCTGCACAGCTAGTTTTCTGTAATTTGTTGATGGAAATTC  
ATAGTATGCCTGTTTATGATTAAAGTTGGTCCCACTATCATAGCCATCTTCTTGTGGTGTATCTG  
TTTCATTTTTCTCATCGAAGCATAATTCCCTAATTGGTATGTGCTGGTTGCGTTGTGTGAATTATTA  
GAATTTGGGTTTGAGACTAACTCAACCCCAAAAAGTCTCATTGGGTGATAGTTGCCCCCATTT  
TTTATACATTATTTGGCATTATTTCTAGTCAATGTTGGACTTGGGTTTTTCCAATATGAATCTTAA  
GAGAAATATGTGATTCTTATTATAAGTCAAGTAACCAGGAAAAAATGGTTCTAAACAACCTTACT  
CACGGCTAGGTTTATTTGTATTTGACATTACTCCAGTAGACTTTAAAAAACAATATAAAAAATGTG  
GAACAGGCTGTAAAGGTTTGATTGGAGAATTCATATGTTACATAATAAATGAAGTGTCTTTCTTC  
TTTTATATGGTTGATAAGGAAAATAAATCAAATGTTCTAGTCTTGATACATTGCATGTGGCTGACA  
GGTTAGCAATTGACTTACTTTTAAACAATAATAAGCAAATTTGAAGTTTGAGAGAAAAGATTGTGA  
TATTATTTTAAAAGATGCCATGAAGAACATAACACAACATACTTACAGGGTAGTGATAGCCAAC  
CTGAATAAGGATCCTAATTAACAAGAAAACACTAAATTTAAGGAAAAATTCAAGGAAAAATA  
CTAAAACAGCCTCAAAGTATACTTATATAATGGATTTGGGCTCAAATCACGCTCTAGAAGGTA  
AATCCTGGTTGCAACAAGAGGCTCGAAAGGAAATTTCTGTTGATATCATATGGGCCCTGTAACCTC  
CATCTAGATCAAAGTTATGGTTGTTTAAATCTCACTTTCCCTATTCAGGATCTATGGGTCATACGT  
GTGGGTTTCTGGCACTCTGCTCACTCTAAGAAATCTTTTGTACATGTGTGGCCAAAAGTTTGTCT  
GTGAAGTTATTGTGGTTTTGCCTCTGCTTGAAGTTTTTCCCTGTAAATTAGTTATTCATCCATTGAA  
AACTTTTTTTTTAACTTAAATATTTTTAATTTCAAGTGAAATTTCTGCTCTTTATAGTTTTTTTTGCCT  
CTTCATTATGGAAGCATCAAATGGGAAGAGAGGAAGGTAAGATGCTTAAAGTGTTTATTGTT  
ATTGGTGATGGTGGTGAATTTATCATGAATTAATAGATCATGGTTACCCTGATGCAAATGAAAA  
GGCTTTATGGACAGAGCAGCTGGAATCACATAAGTCCCTCATCTGCAGTCAAGTTACCTCAGAAA  
AATGTATACATGCCAGCTGAAAATGTAATTATCGCTTCAACATATTTAATGAAATTTATATCATT  
TGCAATTTTATGTTTGCTCAGATGTTGAAATAATTTTCTTCATGTGTTTCTGCAATTTTAAAATATT  
TGATTCTTAAAGCAGGAAAATTCAGTATCTTCTGCAAGAAGGGTACCAGTTTCCAACCAGGAAA  
ACAGTCACTGGCTCAACTTCAACTGTAATAATTCTGAAAACCTGTATGATTTACTTTCACCTGGTTA  
ACTTAAACAACCTTTTTGGTATATTTGGTGTTCCTCAACTTCTGATTCCCCTCCCATGTTAGCAGC  
TGTTTTCTCACAACCTCAAGGTGTTGATGAAGTCAAATTTCCCTGCCTATTCTTCTATGTTGGAAC  
ACAAGTAATTAATTCTGACTACTATGAAACATTGTTTGACCAAAGCCAAATTGGAGCACCACCA  
GATGCAAATTCAGCTTGACTGTTGCACAAAAACAGAAATTTACTATTAAGACTATCTCCCCAGA  
ATGGGGTTATGCCACCGAGACTACCAAGGTTTGTGCATTTAAAGCCCAATTCCTTGCATGCCCTA  
TGCAATGATTTATTACTCTTTGCATAACCGGTGTCTTGTGAACAATGAAAGTGCTCGTTCTTTTGAT  
TCATAACTATTGGTGCTTATACCTTAACTAGTCCCTGAAGAATTTAAAATTTATCTTAACTTTG  
TTGAAGTCTATATGAAATTTCTGTGGTAGTGGTGGTGGTATAAAGCAATTATATAAAGCTCAGT  
CTATTTATAATAATTAGGTTAGGGAAATGTTGCTCAAGCTTGTGTCTTTGGACATTTAAGACTTAT  
CAAGTTGGGGCATATATGTCATCTCTTTTTTTTTCCCTTTCATCTTTCTTATCTTAAAATGATGTTT  
AGTGTTGATTTTGCCAAATTTGATTCCATAAAGCTCCATACTCTATGCATAGGTCAATGTTGTTGGG  
TCTTTTCTCTGTATCCCTCGGATTCTGCATGGGCTTGTATGTTTGGTGTGTTGAAGTTCCTATTG  
AGATAATTCAGGATGGTGTAAATCTCTTGTGAAGCTCCATCTCACCTTCCCTGGAAAGGTTACTCTGT  
GCATTACTTCTGGAAACTGGGAGTCCCTGCAGTGAAGTCAGAGAGTTTGAATATCATGATAAGACC  
AATAGTTGCACTCGATGTACTCAATCCGAAACAGAAGCCACTAGAAGTCCAGAAGAGCTGTTAT  
TACTTGTTAGATTAGGGCAGATGCTTCTTTCTGCATCAACAATAAAGAATGACAACATAGAATCT  
GGAATTCCTCTAATAAAAACCGAAAGCTGATGATGATTCATGGAGCCATATTATAGATGCTCTTCT  
AGTTGGCAGTGGAACGTCGAGTGGTACTGTTGATTGGCTTCTTGAAGAGCTTCTAAAGGATAAGT  
TTCAACAGTGGCTTTCTTTCAGATCACGGGAAAAAGATGAAGAGACAGGCTGCTCTTTGTCCAAG  
AAAGAGCAAGGGATTATTCATGGTTGCTGGGTTAGGTTTTGAGTGGGCCTTGAACCCTATTCT  
CACGTGTGGAGTTAATATAAATTTCCGTGACATCAATGGATGGACTGCCCTTCATTGGGCTGCAC  
GTTTTGGAAGGTAATAGAGAATTCTAGAGAGCTTGCTACTTTGTTTACTGATTTATTTAGTTTTGGT

GAAAGATGTTAGTATTGCTATACAAGGCTTATAGGTAATGAAGATGGGGAAAGCATGCATACTG  
AGGATCACGAAAATGAAAGTCTTGTTTCTTTTAGAAACCATTTTATAATTATCTGTTCCATTTTAA  
ATTATTTTGGATGTTATTTTACTGAAGCTTTGTTATTCCATATAGGGAAAAAATGGTTGCTTCACTT  
ATAGCTTCTGGAGCATCTGCTGGAGCTGTGACAGATCCAAATGCACAAGATCCAAGTGGTAAAA  
CTGCTGCATCTATTGCAGCCAGCAGTGGGCACAAGGGACTGGCAGGGTATCTTTCAGAGATAGCT  
GTAACAAGCCATTTGTCATCGCTTACACTGGAAGAGAGTGAATCATCTAAAAGTTCTGCTTATCT  
TCAGGCGGATAGGACTGTAAACAGTGTCTCCAAGGAAAATCTTACTGCCAATGAGGATCAGGCG  
TCACTCAAAGATACCTTGGCTGCTATCAGAAATGTAACTCAGGCAGCTGCGCGGATACAATCTGC  
TTTTCGCTCACATTTCTTTAGAAAACGGAGAGCAAGAGAAGCAACTGCTAGTACAGGTGGCATTG  
GTACCATTTAGAGATTTCTGCTATGTCAAACTTGCCTTTCGGAACCTCACACGAATATAATTCAG  
CTGCTTTATCCATTCAGAAGAAATATCGAGGTTGGAAAGGTCGTAGAGATTTCTTAGCATTGCGC  
CAAAAAGTAGTGAAGATACAGGTAATAGATGTTAACTTTATAGTTTGACTAAAACAAAATGAAT  
TCCAAGAGCTACATGGATATTATTCTTAATTTATATAACTAGCACTTAAAGATACTCTGAAAGT  
GAATAAATTTGATTTTTAAACCAAAAAACAGTTGGTTATAGGCATGCACGTGCATACTTTGATTC  
AACGGCATTATTATCAACCTTAGTTATTTCTAATTTATTTGGGCAGGCTCATGTGAGGGGTTACCA  
GGTTAGGAAGCATTACAAGGTAATATGGGCAGTTGGAATCTTGGACAAGGTTGTCCTACGATGG  
AGGAGAAAAGGAGCTGGTTTACGAGGTTTCCGACAAGAGATGGACATCAATGAAAATGAAGAT  
GAAGATATTCTCAAGGTGTTCCGAAAACAGAAATTAGATGTAGAAATTGAAGAGGCTGTTTCAA  
GGTGCTGTCCATGGTTGACTACCGGATGCTCGTGAGCAATATCATCGCATGCTTGAGAAATAT  
CGTCAAGCTAAGGTAATAAATTAGTTGAATAATTTAAATATTGTTTTGCATGAGGCTTCCATAG  
GGCATTCCGTGCTCAATCAGAAATAAAGACAAAATAGTAACCATACAGAGCTATCAACCAGTTT  
GACTTTTTAGAGTGCAATTGCTTTGTGCTGTCAATGCATAAATTGTCAATCCCTTGCAGGCTGAA  
CTTGCGGGTACGAGTGACGAAGCATCATTATCAACTTCTGTAGGAGATGACTTATTTATGGATGA  
TTTTTATCCATTTCCCTAAGAGCAAACGCTAGCCTTGTTAATCTTCATTCTTCTGAATGATCAATTT  
GTGGAACAAGCTGACTTATTAGTTTGTGACAGTCTAGATTGTATAGTGATAATAGCGATGGACAT  
TGTTACTTTGTACAGTATGAAATGGTCTTGAATGCAGGTGGGTGGGGTTTCAAATTGAATGGATTA  
AGTTTCTTT



## CDS of Soybean CAMTA family

>Glyma05G178200 (GmCAMTA1)

ATGGCTGAGGCCAGACACTACGTCCCCCCTCTCAATTGGATATTAAGCAAATTATTTTAGAAGC  
ACAGCATCGATGGCTACGTCCGGCTGAAATCTGTGCAATTCTCAGTAATCACAAGAAGTTTCTAA  
TTGCTTCAGAACCTGCACATATGCCACCAAGTGGTTCACTTTTCTTATTTGATCGGAAGGTGCTGA  
GATACTTCAGAAAGGATGGCCATAACTGGAGGAAGAAAAAAGATGGAAAAACAGTTAGAGAA  
GCTCACGAGAGACTAAAGGCTGGAAGCGTGGATGTGTTGCATTGCTACTATGCCCATGGAGAAG  
AAAATGAAAATTTTCGAAGACGCACATATTGGCTACTTGAAGAGGAACTCTCTCACATTGTTCTC  
GTCCATTATCGACATGTGAAGGGAACCAAGGCAAATTTTACATGTGCTAAAGAAAATGAAGAAA  
CTCTTCCTTATGCTCAACAACTGATAAAATTATGCCCAAACAGAGATGGAACTTCTTTATCA  
TCTACTCTTCATCCACATAGTTACCAGGTTCTTCACAACTATGGATAGAAGCATGAACAGTTC  
CCAAGCATCAGAATATGAAGAAGCAGAATCTGCATTCAACAACCATGCAAGTTCCTGAGTTTTATT  
CTTTCTTGAGTTAGAACGCCCTGTTGAGAAGATTACACCTCAACCTGCTGATTCTTATTCTCCTC  
GGCCACTCACAAGAAAGTCTGTACCTAACATGAACTGCATTATTGAATCTGGGACAGATGATCA  
AGAGAAGTCACCTGTCATTCTGGGGTGAATTATATCTCACTCACTCAAGACAATAAAATCAAAG  
ACATTCATAATTTTGGATTGACATATGAATCCCCAAAACCCCTTGGCTTTTCTCATGGGAAGGTA  
TCTTAAAAAATAATGCTGGAAGTCAACATGTGCCTTTTCAGCCTTTATTTCTGGAACACAGCCTG  
ACAACATGGGAATCAATAGCAAATTTTCCCAAGGACATGAGATAATGGTGCCATATTTGACCAC  
CAGCATTGCTAAGCAGCATGAGAATGGAAGTCTCATAAAGCTGAAGGAAATTGGCAGGCTTAT  
GATGTTGATTCTTTACGCATGTCCAGTTGGCCTATAGATAGTGCTTATTCAGGCTCATCATGTGAC  
ATAACTTGCAGCAACCGTGAGCAGGAGGTTAATGATGTTGATTTGCAGAAATCCTTGGAACAGT  
GTCTTCTACATCCATACAAACAAAACAAGGTTTTTCATGCAAATGATCCTCAGGAAAAACTTTTG  
AATGAAAAAGAAAAGATAAAATCAGACCTAGAGGCCAATAGAATCCTGGATGGAATAGAAGAC  
ACATATTTCACTTTTAAAAGGACTCTGTTAGATGGATCTCCAGCAGAAGAGGGTCTGAAGAAGCT  
TGACAGTTTCAACCAATGGATGAGTAAAGAGCTTGCAGATGTGGAAGAGTCTAATAAACCATCC  
ACTTCTGGTGGTTATTGGGATACAGTTGAAAGCGAAAATGAGGTTGGCAACACAACACTATTCCTTC  
ACAAGGGCACCTGGACACCTATGTATTGGATCCATCTGTTTCCCATGATCAGCTTTTTAGCATTAT  
AGACTATTTCCCAAGCTGGGCATTTGAAGGGTCAGAAATTAAGGTTATTATTTCTGGACGATTCTT  
AAGAAGTCAACATGAAGCAGAACAAGGTAATGGTCATGCATGTTTGGCGAGGTAGAAGTGCC  
AGCAGAGATCATTGCAAAGGTGTTCTTTGTTGTACTACTCCTCCACACAAGGCTGGGAGGGTAC  
CTTTCTATGTAACCTGTTCCAATAGGTTAGCATGTAGTGAGGTGAGAGAATTTGATTTCCAAGTCA  
ACTATACTCCAGAAGTTAACTACAGGTGAGAATAGAGGCAGCACTTTTGATACTTTTAGTATC  
CGATTTGGAGAACTGTTGTCCCTGGGGCATGCCTTTCTCAGAATTCAGATTCAATTAGTGTTAGT  
GAGAAATCTCAACTGAGAAGTAAAATCAATCTTTACTGAGGGAGGAGGAGGATGATTGGGACA  
AGCTACTGAACTTACTCAAGAGGAAGATTTTTCTCCAGAAAATTTACAGGAGCAGCTGCTTCAA  
AATCTTCTGAAAGATAAGTTACATGCATGGCTCCTTCAGAAAATAACAGAAGAGGGGAAAGGCC  
CTAATATATTAGATGAGGGTGGCCAAGGTGTGCTTCATTTTGCATCTGCTCTTGGCTATGATTGGG  
CCCTAGAACCCACAATAGTTGCTGGTGTGAATGTGAACTTTCCGGATGTAAATGGATGGACTGCT  
CTTCATTGGGCAGCATTGTTGGCAGGGAGCGCACAGTTGCTTTCTCATCTCTCTCGGCGCAGCA  
CCTGGAGCACTGACTGATCCATGTCCAGAACATCCTTCTGGTAGAACACCAGCTGACCTAGCTTC  
TGCAAATGGACACAAAGGAATTGCAGGGTATCTTGCTGAGTCTTCACTAAGTGCACACCTCACA  
ACTCTCGATTTGAACAGGGACGCAGGAGAAAATTCGGAGCAAAGTAGTCCAAGAGTCCAA  
AACATTGCTCAAGTTAATGATCTTGATGGTTATCATATGAATTGTCATTGAAAGATTCAATTGGCT  
GCAGTGCGTAATGCCACCCACGCTGCAGCTCGTATTATCAAGTTTTCAGAATGCAATCATTTC  
GAGAAAACAACCTGAAGGAATATGATGATGACAACTTGGATTATCTGATGAACGTGCTCTTTCA  
CTTGTAATAAATGAATATGAAATCACACAAGTCTGGACCACGTGATGAGCCTGTCCATGCTGCTG

AGTACGAATCCAAAACAAATCCGCAGTTGGAAGGGAAGAAGAGAATTTTTAATGATTTCGACAA  
CGCATAGTAAAAATTCAGGCTCACGTGAGAGGTCACCAGGTCAGGAAAAGCTGTGGGAAGATA  
ATTTGGTCCGTTGGAATCTTGGAGAAGGTTATTTACGTTGGCGTCGAAAAGGTAGTGGTTTTCGCT  
GGATTTAAACCGGAGGCCAATTCTGAGGGAAGTATGATACAAGATGTATCTTCAACAGATGATG  
ACTATGATGTCTTAAAAGAAGGCAGGAAGCAAACAGAGCAAAGGTTGCAGAAAGCCCTAGCTA  
GGTGAAGTCAATGGTTCAGTATCCAGAGGCAAGAGACCAATACCATAGGCTGTTGAATGTTGT  
AACTGAGATCCAAGAAAATCAGGTAAAGCATGAGAGCAGTTATAACAATTCAGAAGAACCGAG  
AGAATTCGGTGACCTCAACGATCTTGAAGCATTGTTGGACGAAGATATTTTCATGCCTACAGCAA  
CTTAG

>Glyma08G14370 (GmCAMTA2)

ATGGCTGAGGCCAGACTCTACGCTCCCCCTCTCAATTGGATATTAAGCAAATTATTTTAGAAGC  
ACAGCATCGATGGCTACGTCCGGCTGAAATTTGTGCAATCTCGGTAATTATAAGAAGTTTCGAA  
TTGCTCCAGAACCTGCACATATGCCACCAAGTGGTTCACCTTTCTTATTTGATCGGAAGGTGCTGA  
GACTTTCAGAAAGGATGGCCATAACTGGAGGAAGAAAAAAGATGGAAAAACAGTGAGAGAA  
GCTCATGAGAGACTAAAGGCTGGAAGTGTGGATGTGTTGCATTGCTACTATGCCCATGGAGAAG  
AAAATGAAAATTTCAAAGACGCACGTATTGGTTGCTTGAAGAGGAACTCTCTCACATTGTTCTC  
GTCCATTATCGACAAGTGAAGGGAACCAAGGCGAATTTTACAAGTGCTAAAGAAAATGAAGAAT  
CTCTTCCTTATGCTCAACAACTGATAAAATATGCCCCAAACAGAGATGGACACTTCTTTATCAT  
CTACTCTTCATCCACATAGTTACCAGGTTCCCTTCAAAAACCTGTCGATACAAGCATGAACAGTGCC  
CAAACATCAGAATATGAAGAAGCTGAATCTGCATTCAATAACCATGCAAGTTCTGAGTTTTATTC  
TTTCTCGAGTTACAACGCCCTGTTGAGAAGATTTACCTCAACCTGCTGATTTTTTATTCTCCTCGG  
CCACTCATAAATGATCAAGAGAAGTTACCTATTATTCCTGGGGTGAATTATATCTCACTCACTCA  
AGACAATAAAAACAAAGACATTCTTAATGCTGGATTGACATATGAATCCCCAAAACCCCTTGGC  
TTTTCTCATGGGAAGGTATCTTAGAAAATAATGCTGGAAGTCAACATGTGCATTTTTCAGCCTTTA  
TTTTCTGGAACACAGCCTGATAACATGGGAATCAATAGCAATTTTTCTCAAGGAGAAGAGATAA  
TGGTGCCATATTTGACCACCAGCATTGCTAAGCAGCATGAGAATGGAAGTATCATTAAAGCTGA  
AGGAAATTGGCAGGTTTATGATGTTGATTCTTTACGCATGTCCAGTTGGCCTATAGATAGTGCTTA  
TTCAGGCTCAACATGTGAGGTAAGTTGTAGCAACTGTGAGCAGGAAGTTAATGATGTTGATTTTC  
AGAAATCCTTGGAACAGTGTCTTCTACATTACACAAAACAAAACAAGGTTCTCATGCAAAATGA  
TCTTCAAGAAAAACTTTTGAATGAAAAAGAAAAGATAAAATCAAATCTAGAGGCCTATGGAATA  
GAAGACACATATTTATCTTTTTAAAAGGACTCTGTTAGATGGACCTCCAGCTGAAGAGGGTCTGAA  
GAAGCTTGACAGTTTCAACCAATGGATGAGTAAAGAGCTTGGAGATGTGGAAGAATCAAATAAA  
CCATCCACTTCTGGTGGTTATTGGGATACAGTTGAAACTGAAAATGAGGTTGGCAACACAACCTAT  
TCCTTCCAAGGGCACCTGGACACCTATGTATTGGATCCATCTGTTTCCCATGATCAGCTTTTTAG  
CATTATTGACTATTTCCCAAGCTGGGCATTTGAAGGGTCAGAAATTAAGGTTATCATTCTGGAG  
AATTCCTAAGAAGTCAACATGAAGCAGAACAATGTAAGTGGTCATGCATGTTTGGTGAGGTAGA  
AGTGCCAGCAGTGATCATTGCAAAAGGTGTTCTTTGTTGTCATACACCTCCACACAAGGCTGGGA  
GGGTACCTTTCTATGTAACCTTGTTCCAATAGGTTAGCATGTAGTGAAGTGAGAGAATTTGATTTCC  
AAGTCCACTATACTCCAGAAGACACTACAGGTGAGAATAGAGGAAGCACTTTTGATACTTTTTAGT  
ATCCGATTTGGAGAACTTTTGTCCCTGGGGCATGCCTTTCCCTCAGAATTCAGATTCAATTAGTGTA  
AGTGAGAAATCTCAACTGAGAAGTAAAATCAATCTTTATTGAGGGAGGATGATGATGATTGGG  
ACAAGCTACTAAAACCTACTCAAGAGAAAGATTTTTCTCCAGAAAATTTACGGGAGCAGCTGCTT  
CAAATCTTCTGAAAGATAAGTTACATGCATGGCTCCTTCAGAAAATAACTGAAGAAGGGAAAG  
GCCCTAATGTATTAGATGAGGGTGGCCAAGGTGTGCTTCATTTTGCAGCTGCTCTTGGCTATGATT  
GGGCCCTAGAACCCACAATAGTTGCTGGTGTGAATGTGAACCTTCGTGATGTAATGGATGGACT  
TCTCTTCATTGGGCAGCATTTTGTGGCAGGGAGCGCACAGTTGCTTTCTCATCTCTCTCGGCGCA

GCACCCGGAGCACTGACTGATCCATGTCCAGAACATCCTTCTGGTAGAACACCAGCTGACCTAG  
CTTCTGCAAATGGACACAAAGGAATTGCAGGGTATCTTGCTGAGTCTTCACTAAGTGCACACCTC  
ACAACTCTCGATTTGAACAGGGACGCGGGAGAAAATTCCGGAGCAAAGTAGTCCAAAGACTC  
CAAAACATTGCTCAAGTTAATGATCTTGATGGTTTATCATATGAACTGTCATTGAAAGATTCACTG  
GCTGCAGTGTGTAACGCCACCCAAGCCGAGCTCGTATTCATCAAGTTTTCAGAATGCAATCATT  
TCAGAGAAAACAACCTGAAGGAATATGATGATGACAACTTGGATTATCTGATGAGCGTGCTCTT  
CACTCATAAAAATGAATGTAAAATCACACAAGTCTGGACCACGTGACGAGCCTGTCCATGCTGC  
TGCAATACGAATCCAAAACAAATTCCGCAGTTGGAAGGGAAGAAGAGAATTTTTAATGATTGCA  
CAACGCATAGTAAAATTCAGGCTCACGTGAGAGGTCACCAGGTCAGGAAAAGCTGTGGGAAG  
ATAATTTGGTCCGTTGGAATCTTGAGAAAGTTATTTTACGTTGGCGTCGAAAAGGTAGTGGCTTG  
CGTGGATTTAAACCGGAGGCCAATTCTGAGGGAAGTATGATACAAGATGTATCTTCAACAGATG  
ATGACTATGATGTCTTAAAAGAAGGCAGGAAGCAAACAGAGCAAAGGTTGCAGAAAGCCCTAG  
CTAGGGTGAAGTCAATGGTTCAGTATCCAGAGGCAAGAGACCAATACCATAGGCTGTTGAATGT  
TGTAAGTGAAGTCAAGAAAATCAGGTAAAGCATGAGAGCAGTTCTAACAATTCAGAAGAACC  
GAGAGAATTCGGTGACCTCAATGATCTTGAAGCATTGTTGGACGAAGATATTTTCATGCCTACAG  
CAACTTAA

>Glyma15G053600 (GmCAMTA3)

ATGGCGGAGGGTGCTTCTTACGGATTGCGTCGTCCATTAGATATTCAGCAATTACAATTTGAAGC  
CCAGCATCGATGGTTGCGACCTGCAGAAATTTGTGAAATCTTCGTAATTATCGGATGTTTCATAT  
CACATCAGAACCTCATAACAGGCCACCAAGTGGTTCACTTTTTCTTTTTGATCGAAAGGTTTTGAG  
ATACTTTAGAAAGGATGGGCATAATTGGAGAAAGAAAAAAGATGGAAAACTGTGAAAGAAGC  
TCATGAAAAGTTGAAGGTTGGAAGTGTGATGTGTTGCACTGCTACTATGCCCATGGAGAAGAAA  
ATGAAAATTTCAAAGGCCAAGCTACTGGATGCTTGAACCGGATATGATGCACATAGTATTTGTC  
CATTACTTGAAGTTAAGGGTAACAAAAATATTGTTGTAAATAATGAAGGTGATGAAGTCCCAA  
CAGATTCCCAAAGGTAACCTTCTCCATCGTCTAGCCTTCCCACACATCATAGCTGTGTTTCTTAC  
TGAGTACAGATTCCGTGAGCCCAACAACCAGTTTGATGTCTTTACATGAAGATGCTGATTCTGAG  
GATATCCACCATGCAAGTTCTGGGTTGCACCCATTACATGAGTCACAACATAGTGGGAATAGTCC  
ATTGACGGAAAAGATTGGTGCTGGTTGGAACAGTTCATATCTTATGCATCCCTTTTCAGGTGATAA  
TGAACAGTCATCAATTTCTGGAACGGATTATGTCCCTGTTGTTTCATGGGGATAAATTTAGAGGAA  
ATGATACTGCTTATACTGATGGTCAGAAACCGCATGGCATGGCACCATGGGGCACTGTCTTGCAA  
AGCACTGCCAAATTGCACAATGATCCTTCTTGCATCATTTCCCTTCCATCCTACCTAGTTCAATG  
GGAGACGTCTTGAACAAGAACATACCATTTTTGGTGACCTTTTAATGAGCAAAGTGGTCTCAC  
TGAGGAAGCAGAGAGTTCTCAGTCTCTCCAATCAAATTGGCAGATTCTTTTGAAGACAATTCAG  
GAGGCATGCCAATGTTAACCCAAACCAATCATTGGTCTGCAATTTAGATCTGATTATGGCACC  
GGTTTACTAGGGAACGAACTCGTAATGCAAGTTCTGAAATTGCTCCGATCCTGTACAGTTTTTCAT  
GGTGAACCAAAAAGAGCAGCCTATGCAGCAAACCTATCCACAAGAGCCTGAAGATGGACAATCT  
CAACATGCACTAAAATCCAATTCTGCAAATAAAGTTCCTGATGAAGAACTATCAACTATGGCTT  
AACAGTGAAGAGCACATTATTGGACAGAGACGAGAGCCTGAAGAAGGTTGATAGCTTCTCTCGG  
TGGATTACTAAGGAACCTTGGAGAGGTGGCTGATTTGAATATGCAGTCTCACCTGGTATTTTCATG  
GAGTACAGATGAATGCCAGCATGTGATAGATGATACCTCATTGAGCCATCTCTCTCAAGACC  
AACTGTTTAGTATAAATGATTTTACCTAAATGGGCTTATGCTGAGTCTGAAATTGAGGTGTTGA  
TTATTGGATCATTGTTGAAGAGTCAACCAGAGGTGACAACCTGTAAGTGGTCTGTATGTTGGGG  
AAGTTGAGGTTCTGTGAGGTCTTAGCTGATGGAATTTTGTGCTGTCAAGTCTCTTGTGATAAGG  
TTGGACGGGTCCCTTCTATGTAACATGTTCCAATAGGTTAGCTTGTAGTGAAGTGCGGGAATTCG  
ATTTAGAGAGGGCTTTGCTAGAAATGTAGATTTTGCAGATTTTATATCAGTTCAACTGAAATGC  
TGCGTCATTTGAGACTGGAGGATTTTCTTTCTTTAAAGCCAGTGGACCCTTCAAATCATTCTTTTGA

GGGTGATATGGAGAAAAGAACTTAATTTTTAAGCTCATTTCCTGAGAGAGGAGGAGGACTAT  
TCAATTAAGGATGAAGTTACTAGAGAATTGGATATATCCCAACACATGGTGAAGGAGCATCTGTT  
TCACAGGCAGTTTAAAGAGAAGCTGTACTCATGGCTTCTTCACAAAGTAAGTGAAGTAA  
GGCCAAATGTATTAGATGAGGATGGGCAAGGTGTTCTACATTTAGCAGCTTTTCTGGTTATGAT  
TGGGCCATAAATCCAATTATATCTGCTGGAGTTAATATCAACTTCCGAGATGTGAATGGATGGAC  
AGCTCTTCATTGGGCTGCATCCTGTGGCAGAGAGCGGACAGTTGCTGTCTTGTCTCCATGGGTG  
AGATTGTGGAGCACTGACAGATCCATCTCCCGCATTTCATCTGGTAGAACAGCTGCAGATCTTG  
CCTTAGCTATGGGCACAAAGGAATTTCTGGTTTTCTTGCTGAGTCTTCATTAAGTCAACCTCG  
AAACCCTCACAATGGATGATCAAAAAGGTGGTCAGCAAGAAATTTAGGAATGAAGGTGGTGC  
AGACAGTTTCAGAACGATCTGCAACACCTGTGCACTATTGTGATATCCCAGATGCCATCTGCCTC  
AAGGATTCATTTACTGCTGTGCGTAATGCAACACAAGCTGCTGATCGTATACATCAAGTATACAG  
AATGCAGTCATTTAGAGGAAGCAGTTAACTCAGTATGAAGGTGATGATGAGCTTGGATTGTCAG  
ATCAGCAAGCTCTTTCTGCTAGCTTCCAGGGCATGCAAACTGGACAAGGGGATGGTTTAGCC  
AATGCTGCTGCAGTACAGATACAGAAAAAGTTTCGTGGTTGGAAGAAGAGAAAAAGAAATCTTGA  
TGATTCTGCAAAGAGTTGTTAAAATCCAGGCCCATGTTAGAGGTCACCAGATAAGGAAACAGTA  
TAAACCAATCATATGGTCTGTGGGAATCCTGGAGAAGGTCATATTACGTTGGAGGCGCAAGGGT  
AGCGGTTTACGTGGATTTGACCAAATGCCATTAATAAAGTCCCCAATCAACAAAATGATTCTCT  
GAAAGAGGATGATTATGATTATCTCAAGGAGGGACGGAAACAAAAGGAAGAAAAGATCCAAA  
AGGCCCTATCAAGGGTGAAGTCCATGGTTCAGTATCCAGAGGCACGTGCTCAATACCGGCGTCTG  
CTAAATGTTGTTGAGGACTTCCGTCAAACCAAGGCATCTAACAAGGGTTTATCAATTCTGAAGA  
GACAGTTGATGGTGTGGAGGATTTGATTGATATTGATATGCTTTTAGACGATGATAATTTCAATCC  
TATAGCATTGATTGA

>Glyma08G072100 (CAMTA4)

ATGTCGGAGCGTTCGTTCTTTTCGGATTGGGACCTCGATTAGATCTTCAGCAATTACAAGTGAAGCC  
CAGCATAGGTGGTTGCGCCCTGCAGAAATATGTGAAATCTTCGTAATTATCGGATGTTTCAAAT  
CACATCAGAACCACCTAACAGGCCACCAAGTGGTCCCTTTTTCTATTTGATCGGAAGGTTTTAA  
GGTACTTTAGAAAAGATGGACATAATTGGAGAAAGAAAAAGATGGAAAGACTGTGAAGGAAG  
CACATGAAAAGTTGAAGGTGGGAAGTGTGATGTGTTACACTGCTACTATGCCCATGGAGAAGA  
AAATGAAAATTTTCAGAGGCGAAGCTATTGGATGCTTGAAGTGGATATGATGCATATAGTATTTG  
TCCACTACTTGGATGTTAAGGTTAACAAAACCAATATTGGTGGAAAAACATATTCTGATGAGGTT  
ACATCAGATTCCAGAAAGAGCAGTTCTTTGTGATCTGGCTTTCCAGAAATTATGGTAGTATGCCT  
TCAGGAAGTACAGATTCATGAGCCCAACGAGCACTTTGACATCTTTATGTGAAGATGCTGATTC  
AGAGGATATTCATCAAGCAAGTTCAGGATTACACTCCTATCGTGAATCACAAAATTTGGGAATG  
ATCGTCCGATGGATAAGATTCATGCTCGTTCAAATAGTTCTATCTATGCATCCATTTTCAGATA  
ATCATGGGCAGTTACCAGTTTCTGGAGCAGAATATATCCACATGTTAGGGGAATAAGTCTAGA  
GCTAGTGATACTACTTACATTGAGGGTCAGAGAGCACATGGCATTGCATCCTGGGACAATGCCAT  
GGAACAGTCTGCAGGAAAGCATGCTGATCCTTCTCTTGTATCATCTACGTCCATTCCATCAAGTGC  
AATGGGAAACATACTTGACAAAACCACTGTTCCAGGCAACCTTTTAGGGCATAAAATTGCC  
CTCACTGAAGTGGAAAGGGGCGCTCAGCCTGTCCAATCAAAGTGGCAGATTCCTTTTGAAGACA  
ATACTGGAGAATTGCCTAATTGGGGCTTTACCCAATCATTGGGTTTGAATTTGGATCTGATTATG  
GTACTAGTTTACTGGGGATGTAACATAATAATGCAGGCCAGAAATTGATCCTGAGCTGTTCACT  
TTAATGGTGAAGTAAAGAGCAGTATACATGGGCAATCTCAACCTGCACTGAAATCCAATTC  
TGCGTATGAAGTTCCTGGTGAAGCAAGTATCAATTATGCCTTGACCATGAGGCGTGGATTATTGG  
ATGGAGAGGAGAGCCTCAAGAAGGTTGATAGTTTCTAGGTGGATGACCAAAGAAGTTCAGG  
TGTGGATGATCTGCATATGCAGTCTTCCCCTGGTATTTTCATGGAGCACAGATGAATGTGGGGATG  
TGATAGATGATACATCATTGCACCTGTCCCTGTCTCAAGACCAGCTGTTTAGCATAAACCATTTTT

CACCTAAATGGGCTTATGCTGAATCAGAAATTGAGGTGTTGATTGTTGGAACATTTTTAAAGAGT  
CAACCTGTGGTGGCAAAATGTAAGTGGTCCCTGTATGTTTGGGGAAGTGGAGGTTCCCGCTGAGGT  
TTAGCTGATGGAATTTGTGCTGTCAAGCTCCACCTCATAAGATTGGACGGGTCCCTTCTATGT  
AACATGTTCCAATAGGTTTGTCTGTAGTGAAGTTCGGGAATTTGAGTACAGAGAGGGCTTCGATA  
GAAATATAAATTTTCCAGATTTTTTTAAACAATTCAAGTCAAATGGAGCTTCATTTGCGACTGGTGG  
GGTACTTTTCGTTAAACTCAATGCACACTTTAAATCAAGTGTGTTGAGGGTGATATGGATAAAAAGA  
AACTTAATATTCAAGCTTATTTCACTGAAAGAGGAAGAGGAATATTCAAGTAAGGAAGAGACAA  
CTGCAGAGATGGATATATCACAACAGAAGTTGAAGGAGCATATGTTTCACAAGCAGGTTAAGGA  
GAAGTTGTAATCATGGCTTCTTCACAAAGTTACTGAAACTGGTAAAGGGCCTCTGTATTAGATG  
AAGAGGGGCAAGGCGTGTACACTTAATTGCTGCTCTTGGTTATGATTGGGCTATAAATCCTATC  
ATAACTGCTGGAGTCAATATCAACTTCCGTGACGTGAATGGATGGACAGCTCTACACTGGGCTGC  
ATTCTGTGGCCGAGAGCGAACAGTTGCTGTCCTTGTCTCCATGGATGCAGCCGCTGGTGCATTGA  
CAGATCCATGTCCCGAATTTCCCTTTGGGTAGAACACCTGCAGATCTTGCTTCTAGCAAAGGCCAC  
AAAGGAATTTCTGGTTTTCTTGTGCTGAGTCATTATTAAGTCCGACCTCGAATCACTCACAATGGAT  
GAAAATAAAGATGGTAGGAAAGAACTTCAGGAATGAAAGTAGTGCAGACAGTTTCAGAGCGA  
ACTGCGACACCTGTGCTTAATGGTGATATACCTGATGATATCTGCCTTAAGGATTCTCTTAATGCT  
GTCCGTAATGCTACACAAGCTGCTGATCGTATATATCAAGTATTCAGAATGCAGTCATTTTCAGAG  
GAAGCAGTTAGCTCTGTATGAAGATGATGAATTTGGATTGTCAGATCAACAAGCTCTTCTCTCTC  
AGCTTCTAAGGCGTGCAGATCTGGTCAAGGAGAGGGTTTAGCCAATGCTGCTGCAATACAAATA  
CAGAAAAAGTTTCGTGGTTGGACGAAGAGAAAAGAATTCTTGATTATTCGCCAAAGAATTGTTA  
AAATCCAGGCCCATGTAAGAGGTCACCAGGTCAGGAAGCAGTATAAACCAATCATTGTTGCTGT  
GGGAATCCTGGAAAAGGTTATATTACGCTGGAGACGCAAGGGCAGTGGTTACGTGGATTTTCA  
CCAGCTTCCCAGAACAAAGTCCCCGAACAACCAAGCGAATCTCCGAAAGAGGATGACTATGATT  
ACCTCAAGGAAGGAAGGAAACAAAGTGAAGTGAAGTTCAAAAAGGCCCTTTCACGGGTGAAGT  
CCATGGTTCAGTATCCAGAGGCACGGGCTCAATATCGGCGGGTGCTAAATGTAGTTGAGGACTTC  
CGTCAAACCAAGGGAGGTAATTTGAATTTGATAAATTCGGAAGAGACAGTCGACGGTGTGGAGG  
ATTTGATTGATATTGACATGCTTTTAGATGATGAAAATTTCTTACCTATAGCTTTCGATTGA

>Glyma05G117000 (GmCAMTA5)

ATGGCGGAGCGTTCGTGTTTCGGATTGGGACCTCGATTAGATCTTCAGCAATTACAACCTGAAGC  
CCAGCATAGGTGGTTGCGCCCTGCAGAAATATGTGAAATTCTTCGCAATTATCAGATGTTTCAA  
TCACATCAGAACCACCTAACGGGCCACCAAGTGGTTCCTTTTTCTATTTGATCGGAAGTTTTAA  
GGTACTTTAGAAAAGATGGACATAAATTGGAGAAAGAAAAAAGATGGAAAGACTGTGAAGGAAG  
CTCATGAAAAGTTGAAGGTGGGAAGTGTGACGTGTTACTGCTACTATGCCCATGGAGAAGA  
AAATGAAAATTTTCAGAGGCGAAGCTATTGGATGCTTGAACCGGATATGATGCATATAGTATTTG  
TTCACTACTTGGATGTTAAGGTTAACAAAACCAATGTTGGTGGAAAAACATATTCTGACGAGGTT  
ACATCAGATTCCCAGAAGAGCAGTTCCTTGTGTCATCTGGCTTTCCAGAAATTATGGTAGTGTGCCT  
TCTGGAAGTACAGATTCCATGAGCCCAACAAGCACTTTGACATCTTTATGTGAAGATGCTGATTC  
AGAGGATATTCATCAAGCAAGTTCAGGATTACTCTCTATCGTGAATCACAAAATCTGGGGAAT  
GATCGTCCGATGGATAAGATTGATGCTCGTTCAAATAGTTCATATCCTATGCATCCGTTTTTCAGGT  
GATCATGGGCAGTTACCAGTTTCTGGAGCAGAATATATCCACATGTTCTGGGGGATAAGTCTAG  
AGCTAGTGATACTACTTACATTGAGGGTCAGAGAGCACAGGGCATTGCATCTTGGGACAATACC  
ATGGAACAGTCTGCAGGAGAGTATGCTGATCCTTCTCTTGTATCATCTACAACCATTCCATCAAGT  
GCAGTGGGAAACATCCTTGAAGAAAACCACTGTTCCCTGGCAAACCTTTTAGGGCGTAAAAATG  
CCCTAACTGAAGAGGAAAGGGGCTCTCAGCCTGTCCAATCAAATTGGCAGATTCTTTTTGAAGAC  
AATACAGGAGAATTGCCTAATTGGGGCTTACCCAATCATTGGGTTTGAATTTGGATCTGATTAT  
GGTGCTAGTTTACTGGGGGATGTAACATAAATGCAGGCCAGAAAATTGTTCTGAGCTGTTTAC

TTTTAATGGTGAGTTAAAAGAGCAGTCTGTGCACCAAACTTCTCAAAGCTGTATACACATGGGC  
AATCTCAACCTACACTGAAATCCAATTCTGAATATGAAGTTCCTGGTGAAGCAAGTATCAATTAT  
GCCTTGACCATGAGGCGTGGATTATTGGATGGAGAGGAGAGCCTCAAGAAGTTGATAGTTTCTC  
TAGGTGGATGACTAAAGAATTTGCAGGTGTGGATGATCTGCATATGCAGTCTTCCCCTGGTATTT  
ATGGAGCACAGATGAGTGTGGGGATGTGATAGATGATACCTCATTGAATCTGTCCCTGTCTCAAG  
ACCAGCTGTTTAGCATAAATGATTTTTCTCCTAAATGGGCTTATGCTGAATCAGAAATTGAGGTGT  
TGATTGTTGGAACATTTTTGAAGAGTCAACCTGTGGTGGCAAATGTAAGTGGTCTGTATGTTTG  
GGGAAGTGGAGGTTCCCTGCTGAGGTTTTAGCTGATGGAATTCTGTGCTGTCAAGCTCCACCTCAT  
AAGATTGGACGGGTTCCCTTCTATGTAACATGTTCCAATAGGTTTGCTTGTAGTGAAGTTCGGGAA  
TTTGAGTACAGAGAGGGCTTTGATAGAAATATACAATTTGCAGATTGTTTTAACAATTCAACTGA  
AATGGTGCTTCATTTGCGACTGGTGGGTTACTTTCTTTAACTCAGTACGCACTTCAAATCAAGT  
GTTTGAGGGTGATATGGATAAAAGAAGCTTAATATTCAAGCTTATTTCACTGAAAGAGGAAGAG  
GAATATTCAAGTAAGGAAGAGACAACCTGCAGAGATGGATATATCAAAACACAAGTTGAAGGAG  
CTTATGTTTCACAAGCAGGTTAAGGAGAAGTTGACTCATGGCTTCTTCACAAAGTTACTGAAAC  
TGTAAGGGCCCTCTTGATTAGATGAAGAAGGGCAAGGCGTGTACACTTAATTGCTGCTCTTG  
GTTATGATTGGGCCATAAATCCAATCATAACTGCTGGAGTCAATATCAACTCCCGTGATGTGAAT  
GGATGGACAGCTTACACTGGGCTGCATTCTGTGGCCGAGAGCGAACAGTTGCTGTCCTTGTCTC  
CATGGGTGCAGCAGCTGGAGCATGGACAGATCCATGTCCAGAATTTCCCTTCGGGTAGATCACCTG  
CAGATCTTGCTTCTAGCAAAGGCCATAAAGGAATCTCTGGTTTTCTTGCTGAGTCATTATTAAGT  
GCCACCTTGAATCACTCACAATGGATGAAAATAAAGATGGTAGGAAAGAACTTCAGGAACGA  
AAGTAGTGAAAACAGCTTCAGAGCGAACTGCGACACCTGTGCTTTATGGTGATATACCAGATGCT  
ATCTGCCTTAAGGATTCTCTTAATGCTGTCCGTAATGCTACACAAGCTGCTGATCGTATATATCAA  
GTATTCAGAATGCAGTCATTTAGAGGAAGCAGTTTGCTCAGTATGAAGATGATGAATTTGGATT  
GTCAGATCAACAAGCTCTTTCTCTCTAGCTTCTAAGACGTGCAAATCTGGTCAAGGAGAGGGTT  
TAGCCAATGCTGCTGCAATACAAATACAGAAAAAGTTTCGTGGTTGGACGAAGAGAAAAAGAATT  
CTTGATCATTGCGCAAAGAATTGTTAAAATCCAGGCCATGTAAGAGGTCACCAGGTCAGAAAG  
CAGTATAAACCAATCATTTGGTCCGTGGGAATCCTGGAAAAGGTCATATTACGCTGGAGACGCA  
AAGGCAGTGGCTTACGTGGATTTGACCGGCTGCCCTGAACAAGGTCCTGAACAACCAAGCGA  
ATCTCCGAAAGAGGATGACTATGATTATCTCAAGGAAGGAAGGACAGAGTGAAGTAAAGTT  
CAAAAAGGCCCTTTCACGGGTGAAGTCCATGGTTAGTATCCAGAGGCACGGGCTCAATACCGG  
CGGGTGCTAAATGTAGTTGAGGACTTCCGTCAAACCAAGGGAGGTAATTTGAATTTGATAAATC  
GGAAGAGACAGTTGATGGTGTGGAGGATTTGATTGATATTGACATGCTTTTAGATGATGAAAATT  
TCTTACCTATAGCATTGATTGA

>Glyma08G19101 (GmCAMTA6)

ATGGCGGAGGGTGCTTCTTACGGATTGCGTCGTTATTAGATATTCAGCAATTACAATTTGAAGCC  
CAGCATCGATGGTTGCGACCTGCAGAAATTTGTGAAATCTTCGTAATTATCGGATGTTTCATATC  
ACATCAGAGCCTCATAACAGGCCACCAAGTGGTTCACTTTTCTTTTTGATCGAAAAGTTTTGAGA  
TACTTTAGAAAGGATGGGCATAATTGGAGAAAAGAAAAGGATGGAAAACTGTGAAAGAAGCT  
CATGAAAAGTTGAAGATTGGAAGTGTGATGTGTTGCACTGCTACTATGCCCATGGAGAAGAAA  
ATGAAAATTTCAAAGGCCAAGCTACTGGATGCTTGAACCGGATATGATGCACATAGTATTTGTC  
CATTACTTGGAAGTTAAGGTAACAAAAATATTGTAGTAAATACTGAAGGTGATGAGATCCCAT  
CAGATTCCCAAAGGTAACCTTCTCATCGTCTAGCCTTCCCACACATCATAGCAGTGTTCCTTCTC  
TGAGTACAGATTCCGTGAGCCCAACAACCAGTTTGATGTCTTACGTGAAGATGCTGATTCTGAG  
GATATCCACCAAGCAAGTTCTGGGTTGCGCCATTATATGAGTCACAACATAGTGGGAATGGTCC  
ATTGACGGAAAAGATTGGTGTGTTTCGAACAGTTCATATCTTATTCATCCCTTTTCAGGTGATTA  
TGAACAGTCATCAATTTCTGGAACGGATTATATCCCTGTTGTTTCATGGGGATAAATTTAGAGGAA

ATGATACTGCTTATATTGATGGTCAGAAAACACATGACGTGGCAACATGGAGCACTGTCTTGCAA  
AGCACTGCCAAATTGCATAATGATCCTTCTCTTGCAATCATCTCCTTCCATTCCATCTAGTTCAATG  
GGAGATGTCCTTGAACAAGAACATAACCAATTTTTAGTGACCTTTTAATGAGCAAAAAGTGGTCTCAC  
TGAGGTAGCAGAGAGCTCTCAGTCTCTCCAATCAAATTGGCAGATTCTTTTTGAAGACAATTCAG  
GAGGCATGCCAATGTTAACCCAAACCCAGACATTTGGTCTGCAATTTAGATCTGATTATGGCACC  
GGTTACTAGGGAATGAAACTCGTAATGCATGTTCTGAAAGTGCTGCGATCCTGTACAGTTTTAAT  
GGTGAACCAAAAAGAGCAGCCTATGCAGCAAAACTATCTACAAGAGCTTGAAGATGGACAATCTC  
AACATGCACTAAAATCCAATTCTGCAAATAAAGTTCCTGATGAAGAACTATCAACTATGGCTTA  
ACAGTGAAGCGCACATTATTGGACAAAGACGAGAGCCTGAAGAAGGTTGATAGCTTCTCTCGGT  
GGATTACTAAGGAACTTGGAGAGGTGGCTGATTTGAATATGCAGTCTCACCTGGTATTTTCATGG  
AGTACAGATGAATGCCAGCATGTGATAGATGATACCTCATTGAGCCCATCTCTCTCTCAAGATCA  
ACTGTTTAGTATAAATGATTTTTACCTAAATGGGCTTATGCTGAGTCCGAAATTGAGGTGTTGAT  
TATTGGATCATTTTTGAAGAGTCAACCAGAGGTGACAACCTGCAACTGGTCCCTGTATGTTTGGGG  
AAGTTGAGATTCCCGCCAAGGTCTTAGCTGATGGAATTTGTGCTGTCAAGCTCCGCGTCATAAG  
GTTGGACGGGTCCCTTTCTATGTGACATGTTCCAATAGGTTAGCTTGTAGTGAAGTGCGGGAATTC  
GATTCAGAGAGGGCTTTGCCAGAAATGTAGATTTTGCAGATTTTTATAACAGTTCTGAAATTCTG  
CTTCATTTGCGACTAGAGGATTTTCTTTCTTTAAAGCCAGTGGACCCTTCAAATCATTCTTTTGAGG  
GTGATATGGAGAAAAGAACTTGATTTTTAGCTCATTCTACTGAGAGAGGTGGAGGAATATTCA  
ATTAAGGATGAAGTACTACAGAATTGGATATATCCCAACACATGGTGAAGGAGCATCTGTTTC  
ACAAGCAGTTTAAAGAGAAGCTGTACTCATGGCTTCTTACAAAGTAACTGAGAGTGGTAAAGG  
GCCAAATGTATTAGATGAGGATGGGCAAGGTGTGCTACATTTAGCAGCTTTTCTTGGCTATGATT  
GGGCCATAAATCCAATTATATCTGCTGGAGTTAATATCAACTCCGAGATGTGAATGGATGGACA  
GCTCTTCAATTGGGCTGCATCCTGTGGCAGAGAGCGCACAGTTGCTGTCTTGTCTCCATGGGTGCA  
GATTGTGGAGCATTGACAGATCCATCTCCCTCATCTCCAGCAGGTAGAACAGCTGCAGATCTTGC  
CTCTAGCTATGGGCACAAAGGAATTTCTGGTTTTCTTGCCGAGTCTTCATTAACTCACCACTCGA  
AACCCTCACAATGGATGATCAAAAAGGTGGTCGGCAAGAAATTCAGGAATGAAAGCGGTGCA  
GACAGTTTCAGAACGATCTGCAACACCCGTGCACCTTTGGTGAATATGCCAGATCTCTGCCTCAAGG  
ATTCGCTTACTGCTGTGCGTAATGCAACACAAGCTGCTGATCGTATACATCAAGTATACAGAATG  
CAGTCATTCCAGAGGAAGCAGTTAACTCAGTATGAAAGTGATGAGCTTGGATTGTCAGATCAGC  
AAGCACTTCCCTTCTAGCTTCCAGAGCATGCAAATCTGGACAAGGAGATGGTTAGCCAATGCT  
GCTGCAGTACAGATACAGAAAAAGTTTTCGTGGTTGGAAGAAGAGACAAGAATTCTTGATGATTC  
GTCAAAGAGTTGCCCATGTAAGAGGTCACCAAGTAAGGAAACAGTATAAACCAATCATCTGGTC  
TGTGGGAATCCTGGAGAAGATCATATTACGTTGGAGGCGCAAGGGTAGTGGTTTACGTGGATTTT  
GACCAAATGTCATTAATGAAGTCCCCGATCAACAAAATAATTCTCTGAAAGAGGATGATTATGA  
TTATCTCAAGGAGGGACGGAAACAAAAGGAAGAAAAGATCCAAAAGGCCCTATCAAGGGTGAA  
GTCCATGGCTCAGTATCCAGAGGCACGTGCTCAATACCGGCGTCTGCTAAATGTTGTTGAGGACT  
TCCGTCAAACCAAGGCATCTAACGAGGGTTTATGATCAATTCTGAAGAGACAGTTGATGGTATGGA  
GGATTTGATTGATATTGATATGCTTTTAGACGATGATAATTTCAATTCCTATAGCATTTGATTGA

>Glyma17G04310 (GmCAMTA7)

ATGGCTGAGACCACAAAATACATTCCCAACTCACAATTAGAGCTTGAAGAGATATTGAATGAAG  
CAGAACATCGATGGCTTCGACCTGCTGAAATATGTGAGATACTTCGCAATCATAAGAAGTTTAAA  
TTAACACCAGATCCACCTGTTATGCCTCCAGCTGGATCACTATTCTTGTGTTGATCGAAAAGCACTT  
CGTTACTTTTCGCAAGGATGGTCACCGGTGGAGGAAGAAAAAAGATGGGAAGACTGTAAGAGAA  
GCTCATGAAAAGTTGAAGGCTGGTAGTGTGGATGTCTTGCATTGTTACTATGCTCATGGTGAGGA  
TAATGAATACTTCCAACGGAGAAGTTATTGGATGCTTGACGAGCAGTTAGAGCACATTGTCCTTG  
TGCATTATCGTGAAATTAAGAGGGCTGCAAGTCTGGCATCTCACATTTGCCTGTAGTTCCAGTA

ACCCTGGTTGGTAGTTCTCAAATACTTCAGTGCTTTCTCTACCAAATAAAATTCACCAATATCT  
CTAGTTCAGACATCTTTCACATCAAGTGCAAATAAAGTTTATCAGAATGGACGAGCCTCAGAGCA  
TGAGGATGTCAATTCAAAGAATGGTCTCAAGCCTCCTCTCATGCTCAGCCTATCAGCAATTATG  
TACTTCACAGTGCACCTTGGCTTACACATGAAGCTGCAGGGTTTTCTGAGTTGTTAAGGAACCCCT  
TGATTTTCATCATGGCCATCTTCTTTCCCTAGCTACTCTCCTGGTACTGGCTTGTCTCCCTGGACCTC  
AATTCAGAACTCTAGCAGAAACACAATTAATATGCATGATGGAAAGCATCATGTTGAAGCCTCT  
GAAGCAGACTTAACTGTTCGTAAGCTAAGCAATGCTGGGTTAGATTCTGTTACCGAATGCAAGA  
TGGTGTAAATTTTCAGAGATAGGCTCATCTGACATGTGCGTCCAGCCAGTTATAGATTTGCCTAC  
TGTTAATCAGGTGAAAACGAGCATGGTCTGGATTCATTTTCATGCTCAAGTCCATGATCATAATG  
ATCATCCAGTTGTTGCAACTACTAAAATCCTAGTTGAACAAAACTTCAAGATGGTGGTTTATAC  
AATGATGAATCAGAACAAGTTGAATATGGAGAAATGAAGAACTTGATAGTTTTGGAAGGTGGA  
TGGATAAGGAAATTGGTGGAGACTGTGATAATTCCTTGATGGCTTCAGATTCTGGTAATTATTGG  
AGCACACTTGATGCTCATAGTGAGGATAAGGAGGTATCTAGTTTACGCCACATGCAGTTGGATGT  
GGATTCATTAGGTCTTCTCTTTCCCAAGAACAATAATTAGTATCCATGACTTTTCTCCTGATTGG  
GCATATACTGGAGTTAGAACAAAGGTTTTAATAGTTGGCACATTTCTGGGGAGTAAAAGCCCTC  
TAGTGAGACCAAATGGGGATGTATGTTTGGTGAAATTGAGGTTTCAGCTGAAGTTTTGGCGGATA  
ATGTCATAAGGTGTCAGACTCCTTTGCATTCACCTGGACGTGTACCATTCTATATTACCTGCAGTA  
ATAGGTTAGCCTGCAGTGAGGTCAGGGAATTTGAATTTGATGAAAATCCAACCAAATTTTTAGGT  
CTGAGGGTATTAATAATCTCACCAGAAGAAGAGGTACGACTTCAAATGCGACTTCTTAAACTAG  
TAGACTTGGGACCTGACAATAAGTGGTTGAAGTGCTCCGTTTCAGAATGCGAAAAATGTAAACTC  
AAGGGAACAATGTATTCCGTGAGAGATGATAGTGGAGTATTTGAAGAACTTTCCAGATTGATG  
GAATTGGTCATATAAACCATAGAGATATATTATTTTCAGAGATTAGTGAGAGACAAGCTTTATGAG  
TGGTTGATATATAAGGTTTCATGAAGGAGGAAAAGGACCACATGTGTTGGATGATGAAGGACAAG  
GAGTAATACATTTGGCAGCGGCACCTTGGTTATGTGTGGGCTATGGCCCCATTAGTTGCAGCTGGT  
ATCAGTCCTAACTTCAGAGACTCTCGTGGAAGAACAGGACTTCACTGGGCATCATATTTGGGAG  
AGAAGAACTGTTATTGTGCTAGTTCAGTTAGGTGCAACCCCAGGTGCTGTTGAGGATCCGACAT  
CAGCATTTCCTCGAGGACAAACGGCAGCTGATTTAGGTTCAAGTAGAGGACATAAAGGCATTGC  
TGGGTATTTGGCAGAGGCAGATCTGACAAATCAATTATCTGTATTGACTGTCAAGGAAAATGAA  
ACTGGCAACATTGCCACAACAATAGCAGCTAACAGTGCTCTTCAGTCTGTTGAAGATGACTCATC  
TAGTATGACAATGGATGAGCAACATTATCTCAAAGAGTCACTTGCTGTGTTCAAAAATCAGCTC  
ATGCAGCTGCTTCAATCCTAGCAGCCTTTAGAGCAAGGTCATTCTGTCAGAGACAATTAGCCCAA  
AGTAGCAGTGATATTTCTGAAGTACTTGACGTAGTTGCTGATTCTTTGAGCAAGGTACAGAACAA  
GGGTCACTTTGAGGATTATTTACATTTTGCAGCTTTAAAGATTCAAAGAGATATCGGGGATGGA  
AAGGAAGAAAGGATTTTTTGAAGATACGTGACCGCATTGTAAAAATCCAGGCTCATATTAGAGG  
ACACCAAGTTCGTAAGCAGTACAAAAAAGTTGTGTGGTCTGTTAGCATTGTGGAAAAAGCAATC  
CTGCGCTGGAGACGGAAAGGGGCTGGTCTGCGAGGATTCCGGGTTGGGCAGCCAGTTGGTGTG  
TGGTTAAAGATGCCGAGAAAAGTGACGAGTATGAATTTCTTAGCATTGGGAGGAGACAAAAATC  
AGATGATGTAAAGAAAGCTCTAGATAGAGTCAAGTCCATGGTTCGTAACCCAGAGGCAAGGGAT  
CAGTATATGAGGCTCATCATGAAATATGAAAAGTTAAGATTGATGATGGAGGAAGCAGTCAAT  
CACAGCATGTCGGTTAG

>Glyma15G15350 (GmCAMTA8)

ATGATGTCACACAACCTAACGGGGCAGCTTGTGAGTGCAGAGATACATGGCTTTCACACGTTGGA  
GGATTTGGATGTTAGTAATACTATGGAGGAAGCAAAAAGCAGATGGCTTCGTCCCAATGAGATC  
CATGCCATACTCTGTAATCACAATATTTCAAGATCAATGTCAAGCCAGTGAATTTGCCAAAAG  
TGGTACTATTGACTATTTGACCGCAAGATGCTTAGGAACCTCAGAAAAGATGGGCACAATTGGA  
AAAAGAAAACCGATGGGAAAAGTGTCAAAGAAGCCCATGAACACTTAAAAGTTGGCAATGAAG



AAAGGATCCACGTATATTATGCACATGGCCAAGATAACCCAACCTTTGTTTCGTAGATGTTATTGG  
TTGCTTGATAAGAATCTGGAGCACATAGTCCTTGTTTCATTATCGTGACACACAAGAGTTACAATT  
GCAAGGTTCTCCTGCTACACCCGTAATTCAAATTC AAGTTCTGCCTCTGATCCAGCTGCATCTTG  
GATTCCATCAGAAGACTTGGATTCTGGGGTGAACAGTGCTTATGCTGTTGAGCTTAATGACAATTT  
AACTGCCAAAAGTCATGAGCAGAGGCTTCATGAGATTAATACACTTGAATGGGATGACCTAGTG  
GTTCCAAATGTCAACACTTCTACTACATCTAATGGAGGCAACGTCCCATATTCATTTCAAGAAAA  
TCAAAGTTTACTGAGTGGAAGATTTGGCAATGTATCCAGTAATCCTTCAGCAGAAATTCCTTCTTT  
TGGTAATTTAACTCAGCCAGTTTCTGGGAGCAATAGTGCCCCTTACAGTTTCCAGATAGTGCTAT  
TCTTCTGAAAAATAGTCCTATATCATCGGGAGGCGTTGACACCTTGGGCACTTTGGTCAACGAAG  
GCTTGCAAAGTCAGGACAGCTTTGGAACGTGGATGAACATCATATCGGATACACCATGTTCCATA  
GATGAATCAGCTCTTAAAGCATCAATTTCTTCTGTTTCATGTACCATATTCATCACTGGTGGCAGAT  
AATCTGCAATCTTCTCTGCCAGAACAAGTATTTAATCTCACTGAGGTGTCCCCTACATGGGCATCT  
TCCACTGAGAAAACAAAGGTCCTGGTAACTGGATATTTTCATAATAACTATGAAAACCTTGCAAA  
GTCCAACCTACTGTGTGTCTGTGGTGATGTAAGTGTTCCCTGTAGAAATTTGTTCAAGTTGGAGTTA  
CCGGTGTGCGTACCACCACACTCGCCTGGATTGGTCAATCTCTATTTGAGCTTTGATGGCCATAA  
GCCCATCAGCCAAGTTGTTAATTTTGGAGTATCGTACTCCTATTTTGCATGAGCCAACTGCTTCAAT  
GGAAGAGAAATACAACCTGGAATGAGTTTCGACTTCAGATGAGGCTTGCTCATTGCTCTTTGCTT  
CAGACACGAGCCTAACATTTTCTCAAGTAAAGTATCACCGAATGCACTGAAAGAGGCTAGAAG  
ATTTTCCTTCAAACATCATATATCTCCAAAAGTTGGCAATACTTGATGAAGTCAATTGATGACA  
ATACAATTCCATTTTCAAAGTAAAAGATTCCTTGTTTGAACCTGCATTGAAAAACAAATTAAG  
GAATGGCTTTTGGAACGAATTATCTTAGGCAGAAAGAGTACTGAATATGATGCGCAAGGGCAAG  
GTGTAATTCATTTGTGTGCAATGCTAGGATATAGTTGGGCAATCTCCTTATTTCTTGGTCCGGGCT  
GTCGCTGGATTTCCGTGACAAATTTGGATGGACAGCTCTTCATTGGGCAGCATCTTATGGAATGG  
AGAAAATGGTTGCAACTCTGTTGTCTTGTGGGGCAAGGCCAACTTGGTCACAGATCCAACCTCCA  
CAATATCCTGGTGGATGTAAGTCTGCTGCTGATCTTGCCTATATGAAGGGATGTGATGGCTTAGCTGCT  
TTCTTTCTGAGAAGTCTCTGGTTGAGCAGTTCAATGAAATGAGTTTGGCTGGAAATATCAGTGGC  
TCACTGGAAACTAGCTCAACTGATCCAGTAAATGCTGAGAACCTTACTGAGGACCAACTGTACGT  
TAAGGAGACTTTGGCAGCTTACCGTATATCTGCCGAGGCTGCAGCACGGATTCAAGCTGCATTTA  
GGGAGCATTCAATTAATTACGATATAAGGCAGTTGAAATTCAGCCCAGAGGAAGAAGCACG  
TCAAATAGTAGCAGCAATGAGGATTCAACATGCCTTTCGCAACTATGAGTCAAAAAAAAAAGATG  
ACAGCCGCCGCTCGGATTCAGCATAGATTTTCGTACATGGAAGTACCGTAGAGAATTTCTCAACAT  
GCGGCATCAAGCTATCAAATTC AAGCTGCTTTCAGGGGCTTTC AAGCACGGAAGCAATATCGG  
AAAATCATATGGTCTGTTGGGGTGCTTGAGAAAAGTGATCCTGCGTTGGCGTTTAAAGAGAAAAG  
CTTTCGTGGTCTCCAGGTTAATCCTGCCAGGGAGGACGCAGGAAAGTGATTCAATTGCAGAG  
GAGGATTTCTTTCGCACCGGCCGGAACAAGCTGAAGAACGCATTGAGAGGTCTGTCATACGTG  
TGCAGGCCATGTTCCGTTCTAAGAAAGCACAAGAAGAATATAGAAGGATGAAGCTGACACATA  
ATCAAGCAAAGCTGGAACCTGGAATTAGAAGAATTCCTTGATTCTGAAGTTGACATGTTACCCAAG  
ACATAG

>Glyma09G04310 (GmCAMTA9)

ATGATGATGTCACACAACCTTAACGGGGCAGCTTGTGGGTGCAGAGATACATGGCTTTACACCGTT  
GGATGATTTGGATGTTAGTAATACTATGGAGGAAGCAAAAAGCAGATGGCTTCGTCCCAATGAG  
ATTCATGCCATACTCTGTAATCACAAATATTTCAAGATCAATGCCAAGCCAGTAAATTTGCCCAA  
AAGTGGTACTATTGTAATTTGACCGCAAGATGCTTAGGAACTTCAGAAAAGATGGGCACAATT  
GGAAAAAGAAAACCGATGGAAAACTGTTAAAGAAGCCCATGAACACTTAAAAGTTGGCAATG  
AAGAAAGGATCCACGTATATTATGCACATGGCCAGGATAAACCAACCTTTGTTTCGTAGATGTTAT  
TGGTTGCTTGATAAGAGTCTGGAGCATATAGTCCTTGTTTCATTATCGTGACACACAAGAGTTACA

ATTGCAAGGTTCTCCTGCTACACCTGTAAATTCAAATTCAGTTCTGTCTCTGATTCAGCTGCATC  
TTGGATTCCATCAGATGACTTGGATTCTGGGGTGAACAGTGCATATGCTGTTGAGCTTAATGACA  
GTTTAACTGCCAAAAGTCATGAGCAGAGGCTTCATGAGATTAATACACTTGAATGGGATGACCTA  
GTGGTTTCAAATGCCAACACTTCTACTACATCTAATGGAGGCAATGTTCCATATTCATTTCAACAA  
AATCAAAGTTTACTGAATGGAAGCTTTGGCAATGTATCCAGTGATCCTTCAGCAGAAATTCCTC  
TTTTGGTAATTTAACTCAGCTAGTTTCTGGGAGCGATAGTGCTCCTTATAGTTTCCCAGAAAGTGC  
TGATCTTTTGAAGTAGTCTTTATCTTCGGGTGGTGTGACACCTTGGGCACCTTTGGTCAACGA  
AGGCTTGCAAAGTCAGGACAGCTTTGGAACATGGATGAACATCATGTCCGATAACACCATGTTCC  
ATAGATGAATCAGCTCTTGAAGCAACAACCTTCTTCTGTTTATGTACCATATTCATCACTGGTGGCA  
GATAATAAGCAATCTTCTCTGCCAGAACAAGTATTTAATCTCACTGAGGTGTCCCCTGTGTGGGC  
ATCTTCCACCGAGAAAACAAGGTCCTGGTAACTGGATATTTTCATAATAACTATCAACACCTTG  
CAAAGTCCAACCTACTGTGTGTCTGTGGTGATGTAAGTGTTCTGTAGAAATTGTTTCAAGTTGGAG  
TTTACCGGTGCTGGGTATCACCACTCTCCTGGATTGGTCACTCTCTATTTGAGCTTTGATGGCC  
ATAAGCCATCAGCCAAGTTGTTAATTTTGAAGTATCGTACTCCTATTTTGCATGAGCCAAGTCTT  
TAATAGAAGAGAAATACAACCTGGGATGAGTTTCGACTTCAGATGAGGCTTGCTCATTGCTCTTT  
GCTTCAGACAAGAGCCTTAACATTTTCTCAAGTAAAGTATCAACTAATGCTCTGAAAGAGGCTAG  
AAGATTTTCTTCAAACATCATATATCTCTAAAAGTTGGCAACACTTGATGAAGTCAATTGATG  
ACAAAACAATTCATTTTCAAGTAAAAGATGCCTTGTGTTGAAACTTCATTGAAAAACAATTA  
AAGGAATGGCTTTTGAACGAATTATCTTAGGCAGCAAGAGTACTGAATATGATGCGCAAGGGC  
AAGCTGCAATTCATTTGTGTGCAATGCTGGGATATAATTGGGCAATTCCTTATTTACATGGTCCG  
GCTTGTGCTGGATTTCCGTGACAAATTTGGATGGACTGCTCTTCATTGGGCAGCATATTATGGAA  
TAGAGAAAATGGTTGCAACTTTGTTATCTTGTGGGGCAAGGCCAAACTTGGTCACAGATCCAAC  
CCTCAATATCCAGGTGGATGTACTGCTGCTGATCTTGCTTATGTGAAGGGATGTGATGGCTTAGCT  
GCTTACCTTTCTGAGAAGTCTCTGGTTGAGCAGTTCAATGACATGAGCTTGGCTGGAAATATCAGT  
GGCTCACTGGAACTAGCTCAACTGATCCAGTAAATGCTGCGAACCTTACCGAGGACCAACTTT  
ACCTAAAGGAGACTTTGGAAGCTTACCGTACAGCTGCCGAGGCAGCAGCAGTATTCAAGCTGC  
ATTTAGGGAGCATTCAATTTAAATTACGATATCAAGCAGTTGAAATTATGAGCCCAGAGGAAGAA  
GCACGTCAGATAGTAGCAGCAATGAGGATTCAACATGCCTTTCGCAACTATGAGTCAAAGAAAA  
AGATGGCAGCCGCTGCTCGGATTCAGCTTAGATTCGATGGAAGTACCGTAGAGAATTTCTC  
AATATGCGGCGTCAGGCTATTTAAATTCAGCTGCTTTCAGGGGCTTTCAGCACGGAAGCAATA  
TCGAAAATCGTATGGTCTGTTGGGGTCTTGAGAAAGTATCCTGCGTTGGCTTTTAAAGAGAA  
AAGGCTTCCGTGGTCTCCAGGTTAATCCTGCCGAGGAGGAGACACAGGAAAGTGATACAATTGC  
AGAGGAGGATTTCTTTCGCACCAGCCGGAACAAGCCGAAGAACGTGTTGAGAGGTCTGTCATA  
CGTGTGAGGCCATGTTCCGTTCTAAGAAAGCACAGAAGAATATAGAAGGATGAAGCTGACAC  
ATAATCAAGCAATGCTGGATGAATTAGAAGAATTCCTAAATTCTGAAGATGACATGTTACCCAA  
GACATAG

>Glyma05G28090 (GmCAMTA10)

ATGACACCTGGTTACGAATACGATATTAATGATCTGCATCAAGAGGCTCAAGCAAGATGGTTGA  
AGCCTGCAGAAGTGATGTACATTTTACAGAATCATGAAAAGTTCCAGTTCACCCAAGAGCCCC  
ACAACAGCCAACCAGTGGATCTCTGTTTCTGTTTAAACAAAAGAGTCTGCGTTTCTTCCGTAAAG  
ATGGTCATAACTGGCGTAAGAAAAGAGATGGAAGAAGTGTGGGAGAAGCACACGAAAGGCTGA  
AGTTGGAAATGTTGAAGCCTTAAATTGTTACTATGCACACGGAGAGCAGAACCTACTTTCCAG  
AGGCGGAGCTATTGGATGTTGGATCCGGCATATGATCATATTGTTCTTGTGCATTATAGGAACAC  
AAGTGAGGGAAAGCTCAGTTCTGGAGCTGGGGCACAATTGTCACCAAGTTCCTCTTCTGTGTATA  
CTCAGAGTCTAGCCCATATTCTACTCAGAATCCAGGGTCAACATCCATACTTGGCGATTTCATAT  
GAACCTAATCAGAGTTTCTCCAGTCCAGGGTCTACAGAAGTTACGTCTGATATGTTCTGACTGAA

CAATAAAATGGGTCACATGGATGGGACAGATACAGAATCAGGAACCTCGCCTGAACTCGAGGTT  
ACTCAAGCTTTGCGCCGATTGGAGGTGCAGTTAAGTTTGAATGAGGACAACCTTTGAAGATATTGT  
TTCTTCGGAAGTAAGCACGAACTACACATGATTCAAACCTCAGCACGACCAAAGGGTGATC  
AGCAATCAAGAGCAATCTGCTGCTTTCTCTGGACCTGATGATCAAGGGCTATTTTATGATGGATA  
TAATGGAAGGCAAGGTGATGGTGGTGAATTTTATCATGAATTAATAGACCATGGTTACCCTGATG  
GAAATGAAAAGGCTTTATGGACAGAGGTGCTGGAATCATGTAAGTCCTCATCTGCAGTCAAGTT  
ACCACAGAAAAATGTATACATGCCAGTTGAAAATCTGGAAAATTCAGTATCTTCTGCAAGAAGG  
GTACCAGTTTCCAACCAGGAAAACAGTCACTGGCTCAACTTCAACAGTAATAATTCTGAAAACCTC  
TGTTTTCTCACAACTCAAGGTGTTGATGAAGTCAAATTTCTGTCTATTCTTCTATGGTGAAAAC  
ACAAGTAATTAATTCTGACTACTATGAAACATTGTTTGACCAAAGCCAAATTGGAGCACCTCCAG  
ATGCAAATTCAAGCTTGACTGTTGCACAAAAACAGAAATTTACAATTAAGACAATCTCCCCAGA  
ATGGGGTTATGCCACTGAGACTACCAAGGTCATTGTTGTTGGGTCTCTTCTGTGCATCCCTCGGA  
TTCTGCATGGGCTTGATGTTTGGTGAAGTTCCTGTTGAGATAATTCAGGATGGTGTAAAT  
CTCTGTGAAGCTCCATCTCACCTTCTGGAAAAGGTTACTCTGTGCATTACTTCTGGAAACCGGGA  
GTCCTGCAGTGAGGTCAGAGAGTTTGAATATCGTGATAAGACCAATAGTTGCACTCAATGTACTC  
AATCAGAAACAGAAGCCACTAGAAGTCCAGAAGAGCTGTTATTACTTGTAGATTAGAGCAAAT  
GCTTCTTTCTGCATCAACAATAAAGAATGACAACATAGAATCTGGAATTCCTCTCATAAAACAGA  
AAGCTGATGATGACTCGTGGAGCCATATTATAGAGGCTCTTCTAGTTGGCAGTGGAACGTCGACT  
GGTACTGTTGATTGGCTTCTTGAAGAGCTTCTAAAGGATAAGCTTCAACAGTGGCTTTCTTGCAGA  
TCTCAGGAAAAAGATGAAGAGACAGGCTGCTCTTTGTCCAAGAAAGAGCAAGGGATTATTCACA  
TGGTTGCTGGGTTAGGTTTTGAGTGGGCCTTGAACCCTATTCTCACTTGTGGAGTCAATATAAATT  
TCCGTGACATCAATGGGTGGACTGCCCTTCAATTGGGCTGCACGTTTTTGAAGGGGAAAAAATGGTT  
GCTTCACTTATAGCTTCTGGAGCATCTGCTGGAGCTGTGACAGATCCAAATGCACAAGATCCAAC  
CGGTA AAACTGCTGCATCTATTGCAGCCGGCAATGGGCACAAGGGACTGGCAGGGTATCTTTCA  
GAGATAGCTGTAACAAGCCATCTGTCACTCTTACACTGGAAGAGAGTGAATTATCTAAAAGTTC  
TGCTGAGCTTCAGGCAGATATGACTGTTAACAGTGTCTCCAAGGAAAAATCTTACTGCCAGTGAGG  
ATCAGGCATCACTCAAAGATACCTTGGCTGCTATCAGAAATGTAACTCAGGCAGCTGCGCGGAT  
ACAATCTGCTTTTCGTTACATTTCTTTTAGAAAACGAAGAGCAAGAGAAGTAGCTGCTAGTGCAG  
GTGGCATTGGTACCATTTACAGAGATTTCTGCTATGTCAAAACTTGCCTTTCCGAACTCACGTGAAT  
ATAATTAGCTGCTTACAGCTGCTTTATCGATTGAGAAGAAATATCGAGGTTGGAAAGGTCGCAAA  
GATTTCTTAGCGTTGCGCAAAAAAGTAGTGAAGATACAGGCTCATGTGAGGGGCTACCAGGTTA  
GGAAGCATTACAAGGTAATATGGGCAGTTGGAATCTTGGACAAGGTTGTCTTACGATGGAGGAG  
AAAAGGAGCTGGTTTACGAGGTTTCCGACAAGAGATGGACATCAACGAAAATGAAAATGAAGA  
TGAAGATATTCTCAAGGTGTTCCGAAAACAGAAAGTTGATGTAGAAATTGAAGAGGCTGTTTCA  
AGGGTGCTGTCCATGGTCGACTCACCAGATGCTCGTGAGCAATATCATCGCATGCTTGAGAAATA  
TCGTCAAGCTAAGGCTGAACTTGCGGGTACGAGTGACGAGGCATCATTATCAACTTCTGTAGGAG  
ATGACTTATTTATTGATGATTTTTATCCATTTCCCTAG

>Glyma18G00840 (GmCAMTA11)

ATGCCACCTGGTTTTGGAGTACAATATCGATGATCTGTTTTCAAGAAGCTAAGAGGAGATGGCTCAA  
GCCTGTGGAAGTGCTTTACATTTTACGGAATCACGACCAGTGCAGTTACCCACCAGCCCCCTC  
ATCAGCCAGCTGGTGGATCCCTGCTTCTGTTAATCGAAGAATCATGCGTTTCTTCCGTAAGATG  
GTCATAACTGGCGGAAGAAAAAAGATGGCAAACTGTGGGAGAAGCGCATGAACGGCTTAAGG  
TTGGCAATGTTGAAATCCTAAACTGTTACTATGCACATGGAGAGGAGAACCGTACTTTTCAGAGA  
CGGAGCTATTGGATGTTGGAGCCGGAATATGACCATATTGTTCTTGTGCATTATAGAGAACTAG  
TGAGGGGAAATCCAAATCTGAACATGTCACACAATTGTCATCAGGTTCTCTCTCTGTTTTTAGTCA  
GAGTCATAGCTCGTATACTACTACAACCCAGGAACAGCATCCATGTTTGGTGATTTCATGTGAAC

CTAATCAGAAATTTTCTAGTTCTGGGTCTTTAGAAGATACATCCGAAGCACAAGCCTTGCGCCAA  
TTGGAAGAACAGCTGAGTTTGAATGAGGACATTTTCAATGAAATTGCACTTGATTTAATCCCAGG  
TCAAGATCAAAGGGTGGTTTATAAGCAAGATAACTCTGTAGCTTTGTCTGGACCAAATGATCCAG  
GACAACCTTGTGATGGATATAATGGAAGAGAAGATGACAGTGGTACATATTATCATGACTTTCTT  
GATGATTGTCCTGGTGAAATGAAAAAACTATATACTGGACTGAAGTGCTGGAATCGTGTAAGC  
CCTTATCTGTGACCAAATTACCAGATCAACATGCATATGACGCGATTGAAAATGGAAAGTCATTA  
TTTTCTTCAGGAAGAGGAATGATTGCCAACCGGGAAAAAAATCAGTGGCTAAACTCCAACAGTA  
ATAATGTTGAAAACCTCTGTTTTCTGTTTCCTCAAGACATTGGAGTCAAATTTCTCCATATTCTAT  
GGTAGAAACTCCAGGAACTAACTATGACTACTATGAAACCTGTTTTGATCAATTCCAAAATCAAG  
AACCTCTGGGTGTAGATTCAAGCTTCACTGTTGTGCAGAAACAGAAATTTACAATTAGGGCAGTT  
TCCCCAGAATACTGTTATGCCACTGAGACTACAAAGGTGATCATTATTGGGTCATTTCTATGCCAT  
GACTCGGATTCTACCTGGGCCTGTATGTTGGTGATGTTGAAGTTCCTGCAGAGATAATTCAGGAT  
GGTGAATCTGTTGTGAAGCTCCATCTTATCTTCTGGGAAGGTTAATTTGTGTGTTACTTCAGGAA  
ATAGGGTGCCATGCAGTGAAGTGAGGGGGTTGAGTTTCGAAATAAGACTACTAGTTGCACTCGC  
TGTAATTCATTGGAAACAGAAGGCAGCAAAAGTCTAGAAGATCTGTTATTACTTGTTCGATTGTC  
AGAGATGCTCCTTTCTGCTTCAACTACAAAGGATGACAGAATAGAATCTGGAAGTTATCTTTCAA  
CAGAACAGAAAGATGATGATGATTCATGGAGCCATATTATTATAGACTCTTCTAGATGGCACC  
AGAACATCATCTGATACTGTTAACTGGCTTCTGAAGAGCTGCTGAAGGATAAGTTGCAGCTCTG  
GCTTCTAACCGAAGAGATGAAGGGACAGGCTGTTCTTTTTCCAGGAAAGAACAGGGGATAATA  
CACATGATTTCTGGGTGGGTTTTGAGTGGGCCTTGAGCCCCATTCTTAGTTGTGGTGTGAATATA  
AATTTCCGTGACATCAATGGGTGGACCGCTTTCATTGGGCTGCTAGGTTTGGGAGGGAAAAAAT  
GGTGTCTCGCTTATAGCTTCTGGTGCATCTGCTGGAGCAGTGACAGATCCAAGTTCACAAGATC  
CAACAGGTA AAACTGCTGCATCTATTGCAGCTAGCCATGGCCATAAGGGACTGGCAGGTTATCTT  
TCAGAGGTAGACCTAACAAGCCATCTGTCATCCCTCACATTGGAAGAGAGTGAGCTTTCTAAAG  
GATCTTCTGAGCTTGAAGCCGAGTTAACTGTCAGTAGTGTCTCTAAAGAAAATCTTGTGGCCAGT  
GAGGATCAGGTTTCACTACAAGCTTTCCTGGATGCTGTTAGAAATGCAGCTCAGGCAGCTGCACC  
GATACAAGCTGCTTTTTCGTGCACATTCTTTTAGAAAACGGAAAGAAAGAGAAGCTGCTGCTGAC  
GCTGGTCTAGATGGATATTGTATTGATGCAGGTAGCATTGATAATAACATTTCAAGTCTTTCTGCC  
GTGTCAAACTTAGTTCTCAGAGCTGTCGTGATTACAATTTAGCTGCCTTATCGATTGAGAAAGAA  
ATATCGAGGCTGGAAAGGTTCGTAAGAATTCTTAGCATTGCGCCAGAAAGTAGTTAAGATACAG  
GCTTGTGTAAGGGGATACCAGGTTCCGGAAGCAATACAAGTTAATATTATGGGCAGTTGGAATCTT  
GGACAAGGTTGTGCTACGATGGCGCAGAAAACGAATTGGTATACGAAGTGTCCGGCAAGAAAT  
GGAATCAAATGAAGAAGAAAGTGATGATGAAGATTTTCTCAGCGTGTTCGGAAAGAGAAAGTA  
AATGCAGCAATTGAAAAGGCTTTGAAGCAGGTGCTTTCCATGGTCCATTCTCTGGTGCTCGTCA  
GCAATATAGGCGCTTGTCTTTGTTGTATCGTCAAGCCAAGGCCAAGACTGAACGTGGCAGCACGA  
GTGATGAAGCACCTTATCAACTTCGGAAGAGGAAGTTTCCAATATGGAAGATGATGATTTGTGT  
CAATTTTGGGAAACGTTCTGGCCTTCTAG

>Glyma17G03510 (GmCAMTA12)

ATGGCGAATAACTTAGCGGCGCAACAACCTGGTTGGTTCAGAGATACATGGATTCCACACATTGC  
AAGATTTGGATGTGGGGAGCATTATGGAGGAAGCAAGAACCAGATGGCTCCGTCCCAATGAGAT  
TCATGCCATGCTTTGTAATTACAAGTATTTTACCATTAATGTCAAGCCAGTGAATTTGCCAAAAG  
TGGTACTATTGTCTTATTTGATCGCAAGATGCTTAGGAACTTCCGTAAAGATGGGCACAACCTGGA  
AAAAGAAAAAGGATGGGAAAACCGTTAAAGAAGCTCATGAGCACCTAAAAGTTGGTAATGAAG  
AAAGGATCCATGTATATTATGCACATGGCCAGGATAACCCAAATTTTGTCCGAAGATGTTATTGG  
CTGCTTGATAAGAGTATGGAACACATAGTCCTTGTTCATTACCGTGAAATACAGGAGATGCAAGG  
TTCTCCCGTCACTCCTGTAAATTCACACTCCAGTTCTGTCTCTGATCCTCCTGCACCATGGATTTTA

TCAGAAGAAATAGATTTCAGGAACCACAACACTGCATATGCTGGTGACACGAGTGCCAATATAAATG  
TCAAAAGTCATGAACTCAGACTTCATGAGATTAATACACTTGATTGGGATGACCTGGTGGATGCA  
AATGATCATAACACAACACTACTGTGCCTAATGGAGGTAAGTTCATATTTTTGATCTACAAGATCA  
AATTTTACTGAATGACAGTTTCAGCAATGTAGCCAACAATCTATCTGCAGACATTCCTTCTTTTGG  
TAGTCTCACTCAGCCTATTGCTGGGAGCAACAGTGTTCCTTACAATTTTTCAAGTGTTAATCTTCA  
GACGATGGACGATCAAGCAAATCCACATGAGCAGAGGAATAATACAGTTTCTTAAAGTGGTGT  
GATTCCTTGGACACTTTGGTCAATGATAGATTGCAAAGTCAGAACAGCTTTGGAATGTGGGTAAA  
CCCCATCATGTCTGATTACCATGTTTCAGTAGATGACCCAGCTCTTGAATCCCCAGTTTCATCCGT  
TCATGAACCATATTCATCTCTGATAGTGGATAGTCAGCAATCTTCTCTGCCAGGACAAGTATTTAC  
TATCACTGATGTATCCCCTACATGCGTATCTTCCACTGAGAAATCAAAGGTCCTGGTGACTGGATT  
TTTTCATAAAGACTATATGCACCTTTCAAAGTCCAATCTATTATGTGTCTGTGGTGTAGTGT  
CCTGCAGAAATTGTTTCAGGTTGGGGTCTACCGGTGCTGGGTATCACCACATTCTCCAGGATTCGT  
GAATCTCTACATGAGCATTGATGGCCATAAGCCTATTAGCCAAGTTGTTAATTTGAATATCGTAC  
TCCGTGCTTTCATGATCCCCTGCGTATCTTCCACTGAGAAATCAAAGGTCCTGGTGACTGGATT  
AAATGAGGCTTGCATATTTGCTCTTTAAACAATTGAACCTTGTATCTCCACTAAAGTATCAC  
CCAATAGACTTAAAGAGGCTAGACAATTCGCCCTCAAACATCATTTATTTCCAATAGTTGGCAA  
TACTTAATCAAGTCAACTGAAGACAACCAAATTCATTTTACAAGCAAAGATGCTCTATTCGG  
AATTGCATTGAAAAGCAGACTAAAGGAATGGCTTTTGGAAAGAATTGTTTTAGGCTGCAAGACT  
ACTGAATATGATGCTCATGGCCAAAGTGTAAATCCATTTGTGTGCAATTTGGGATATACTTGGGCT  
GTTTCCTTGTTCATGGTCAGGCTTGTATTGGATTTCCGTGATAGGTCTGGATGGACAGCTCTTC  
ATTGGGCAGCATATTGTGGAAGGGAGAAAATGGTTGCAACTCTGTTGTCTGCTGGGGCGAAGCC  
AAATTTGGTCACTGATCCTACTCCCCAAAATCCTGGTGGATGCACTGCTGCTGATCTTGCTTATAT  
GAGGGTTCATGATGGCTTAGCAGCTTATCTTTCAGAAAATCTCTGGTTCAGCACTTCAATGACA  
TGAGCTTAGCTGGAATATCAGCGGCTCACTTGAAGTACGACGACTGATCCGTAATTTCTGCA  
AACCTTACGGAGGACCAGCAGAACCTGAAGGATACATTGGCAGCTTACCGAACTGCTGCTGAGG  
CAGCTTCCCGCATAACATGCTGCATTTAGGGAACACTCTCTAAAAGTGAAGTAAAGGCGGTTGCA  
TCTTCCCATCCAGAGGCTCAAGCACGCAAAATAGTTGCAGCAATGAAGATTCAGCATGCCTTTAG  
GAACCACAAGACAAAGAAAGTGTGGCAGCTGCTGCTCGCATAACAGTGTACATACCGTACATGG  
AAGATTTCGTAAAGAATTTCTCAACATGCGTTGTGAGGCTGTTAAAATTCAGCTGCGTTCCGGTG  
CTTTCAAGTGCAGGAAAGCATTATTGCAAAATCTTTGGTCTGTTGGTGTGCGTTGAGAAAGCAGTGT  
GCGTTGGCGTTTGAAGAGAAGGGGTTTCCGTGGGCTCCAGGTCAAAGTGTGCAAGCGGGAAGT  
GGAGATCAGGATCAGCAAAGTGTAGAGGAGGAATTCTCCGGGCTGGTAGGAAACAAGCT  
GAAGAACGTGTTGAGAGATCTGTGGTACGTGTGCAGGCTATGTTCCGTTGCAAGAAAGCACAAG  
AAGAGTACAGGAGGATGAAATTGGCCCTTGATCAAGCAAAGCTTGAGCGAGAATTGCAACGACT  
TCTTAGTACTGAAGTTGACATGCAACTGAAGACATAG

>Glyma07G37090 (GmCAMTA13)

ATGGCGAATAACTTAGCGGTGCAACTGGTGGTTCAGAGATGCATGGATTCCACACATTGCAAG  
ATTTGGATGTGGGGAGCATTATGGAGGAAGCAAGAACCAGATGGCTCCGTCCCAATGAGATTCA  
TGCCATGCTCTGTAATTACAAGTATTTTACCATTAATGTCAAGCCAGTGAATTTGCCAAAAAGTG  
GTACTATTGTCTTATTTGACCGCAAGATGCTTAGGAACTTTCGAAAAGATGGGCACAACCTGGAAA  
AAGAAAAAGGATGGGAAAAGTGTAAAGAAGCTCATGAGCACTTAAAAGTTGGTAATGAAGAA  
AGGATCCATGTATATTATGCACATGGCCAGGATAACCCAAATTTGTCCGAAGATGTTATTGGCT  
GCTTGATAAAGAGTATGGAACACATAGTCCTTGTTCATTACCGTGAACACAGGAGATGCAAGGT  
CTCCTGTCACTCCTGTAAATTCACACTCCAGTTCCTGTCTCTGATCCTCCTGCACCGTGGATTTTATC  
AGAAGAAATAGATTTCAGGAACCACAACACTGCATATACTGGTGACATGAGTAACAATATAAATGTC  
AAAAGTCATGAACTCAGACTTCATGAGATTAATACACTTGAATGGGATGACCTAGTGGACACAA

ATGATCATAACGCCTCTACTGTGCCTAATGGAGGCACTGTTCCATATTTTGATCAACAAGATCAA  
ATTTTACTGAATGACAGTTTCGGCAATGTAGCCAACAATCTATCTGCAGAAATTCCTTCTTTTGGT  
AATCTTACTCAGCCAATTGCTGGGAGCAACAGAGTTCCTTACAATTTTCTGAAAGTGTTACTCTT  
CAGACGATGGACAATCAAGCAAATCCACATGAGCAGAAGAATAATACAGTTTCCTTAAGTGGTG  
TTGATTCCTTGGACACTTTGGTCAATGATAGATTGCAAAGTCAGGACAGCTTTGGAATGTGGGTG  
AACCACATCATGTCTGATTCACCATGTTCAAGTAGATGACCCAGCTCTTGAATCACCAGTTTCATCC  
ATTCATGAACCATATTCGTCTCTGGTAGTGGATAGTCAGGAATCTTCTCTGCCAGAACAAGTATTT  
ACTATCACTGATGTATCCCCTACATGTGTATCTTCCACCGAGAAATCAAAGGTCCTGGTGACTGG  
ATTTTTTCTTAAGGACTATATGCACCTTTCAAAGTCCAATCTATTATGTGTCTGTGGTGATGTTAGT  
GTTCTGCAGAAATGTTCAAGTGGGGTCTACCGTTGCTGGGTATCACCACACTCTCCAGGATTT  
GTGAATCTCTACTTGAGCATTGATGGCCATAAGCCTATTAGCCAAGTTGTTAATTTGAATATCGT  
ACTCCTGCTTTCATGATCCTGCAGTTTCAATGGAAGAGAGTGACAATTGGGACGAGTTTCGACA  
ACAAATGAGGCTTGCATATTTGCTCTTTGCTAAACAATTGAACCTTGATGTTATCTCCAGTAAAGT  
ATCACCTAATAGACTTAAAGAGGCTAGGCAATTCGCCCTCAAACATCATTTATTTCCAATAGTT  
GGCAATACTTAATCAAGTCAACTGAAGACAACCAAATTCATTTTCACAAGCAAAGATGCCCT  
GTTTCGGAATTACATTGAAAAACAGACTAAAGGAATGGCTTTTGGAAAGAATTGTTTTAGGCTGCA  
AGACTACTGAATATGATGCTCATGGCCAAAGTGTAATCCATTTGTGTGCAATTTTGGGATATAATT  
GGGCTGTTTCCTATTTTCATGGTCAGGCTTGTCAATTGGATTTCCGTGATAGGTTTGGATGGACAGC  
TCTTCATTGGGCAGCATATTGTGGAAGGGAGAAAATGGTTGCAACTCTGTTGTCTGCTGGGGCGA  
AGCCAAATTTGGTCACTGATCCTACTCCACAAAATCCTGGTGGATGCACTGCTGCTGATCTTGCTT  
ATATGAGGGGTCATGATGGCTTAGCAGCTTATCTTTCAGAAAAATCTCTGGTTCAGCACTTCAAT  
GACATGAGCTTAGCTGGAAATATCAGTGGCTCACTGGAACTAGCACGACTGATCCAGTAAATC  
CTGCAAACCTTACCGAGGACCAGCAGAACCTGAAGGATACGTTGACAGCTTACCGAACTGCTGC  
TGAGGCAGCTTCCCGCATAACATGCTGCATTTAGGGAACACTCTCTAAAAGTGAAGTAAAGGCG  
GTTGCATCTTCCAATCCAGAGGCTCAAGCACGCAAAATAGTTGCAGCAATGAAGATTCAGCATG  
CCTTAGGAACCACGAGACAAAGAAAATGATGGCAGCTGCCGCTCGCATTAGTGTACATACCG  
TACATGGAAGATTCGTAAGAATTTCTTAACATGCGTCGTCAGGCTGTTAAAATTCAGCTGCAT  
TCCGGTGCTTCAAGTTCGGAAGCATTATCGCAAAATCTTTGGTCTGTTGGTGTGGTTGAGAAAG  
CAGTGCTGCGTTGGCGTTTGAAGAGAAGGGGCTTCCGTGGTCTCCAGGTCAAAGTGTGATGCG  
GGAACCGGAGATCAGGATCAGCAAAGTGATGTAGAGGAGGAATCTTCCGGACTGGTAGGAAG  
CAAGCCGAAGAACGTGTTGAGAGATCTGTAGTACGTGTGCAGGCTATGTTCCGTTCGAAGAAAG  
CACAAGAAGAGTACAGGAGGATGAAATTGGCCCTTAATCAAGCAAAGCTGGAGCGGGAATACG  
AACAACTTCTTAGTACTGAAGTGGACATGCAACTGTAG

>Glyma11G36930 (GmCAMTA14)

ATGGCAGGTTTGGAGTACAGCATCGATGATCTGTTTCAAGAAGCTAAGAGGAGATGGCTCAAGC  
CTGTGGAAGCTCTTTACATTCTACGGAATCACGACCAGTGCAAGTTCACCCACCAGCCCCCTCAT  
CAGCCAGCTGGTGGATCCCTGTTTCTGTTAATCGTAGAATCATGCGTTCCTTCCGTAAAGATGGT  
CATAACTGGCGGAAGAAAAAAGATGGCAAACTGTGGGAGAAGCGCATGAACGGCTTAAGGTT  
GGCAATGTTGAAATCCTAAACTGTTACTATGCACATGGAGAGGAGAACCGTACTTTTCAGAGAC  
GGAGCTATTGGATGTTGGAGCCGGAATATGATCATATTGTTCTTGTGCATTATAGAGAAACAAGT  
GAGGGGAAATCCAATTCTGAGCATGTCACACAATTGCCATCAGAAGTTACGTTTCAAGCACAAG  
CCTTGCGCCAATTGGAAGAACAGCTGAGTTTGAATGATGATGGCTTCAATGAAATTGCACTTGAT  
TTAGTGTCAAGTCAAGATCAAAGGGTGGTTTATAAGCAAGATAAATCTGCAGCTTTGTCTGGACC  
AAATGATCTAGGACAACCTTGTGATGGATATAATGGAAGACAAGATGACAGTGGCACATATTAT  
CATGATTTTCTTGTGATTGTCCTGGTGGAAATGAAAAACTATATACTGGACGAAAGTGTGGA  
ATCGTGTAAGCCCTTATCTGTGACCAAATTACCAGATCAACATGCATATGAGGCGATTGGAATG

AAAATACATTATTTTCTTCGGGAAGGGGAGTGATTGCCAACCTGGAAAACAATCAGTGGCTAAA  
CTCCAACAGTAATAATATTGAAAACATAGGTGGGGTCAAATTTCCACCATATTCTCTAGCAGAAA  
CTCCAGGAGCTAACTCTGACTACTATGAAACATTTTTTGACCAATTCCAAAATCAAGGACCTCTG  
GGTGTAGATTCAAGCTTGACTGTTGTGCAGAAACAGAAATTTACCATTAGGGCAGTATCCCCAGA  
ATACTGTTATTCTACCGAGACTACAAAGGTGATCATTATTGGGTCAATTTCTCTGCCATGACTCGGA  
TTCTACCTGGGCCTGTATGTTTGGTGATGTTGAAGTTCCTGCAGAGATAATTCAGGACGGCATAAT  
CTGTTGTGAAGCTCCATCCAATCATCTTGAAAGGTTAATTTGTGCATTACTTCAGGAAATAGGGT  
GCCATGCAGCGAAATGAGGGAGTTTGTGTTTCGAAATAAGACTACTAGTTGCACTCGCTGTAATT  
CATTGGAAACAGAAGGAAGCAAAAGTCTGAAGATCTGTTATTACTTGTTCGATTTGCAGAGATG  
CTCCTTTCTTCTCAACTACAAAGGATGACAGAATAGAATCTGGAAGTCATCTTTCAACAGAACA  
GAAAGATGATGATGATTTCGTGGAGCCATATTATAGACACTCTTCTAGATAGCACTAGAACACCAT  
CTGATGCTGTTAAATGGCTTCTTGAAGAGCTGCTGAAGGATAAGTTGCAGCTCTGGCTTTCTAACC  
GAAGAGATGAAGGGACGGGCTGTTCTTTGTCCAAGAAAGAGCAGGGGATAATACACATGGTTTC  
TGGGTTGGGTTTTGAGTGGGCCTTGAACCCCATCTCAGTTGTGGTGTGAATATAAATTTCCGTGA  
CATCAATGGATGGACCGCTCTTCATTGGGCTGCACGGTTTGGGAGGGAAAAAATGGTTGCTTCAC  
TTATAGCTTCTGGTGCATCTGCTGGAGCAGTGACAGATCCAAGTTCACAAGATCCAACCGGTAAA  
ACTGCTGCATCTATTGCAGCCAGCCATGACCATAAGGGTCTGGCAGGTTATCTTTCAGAGGTAGA  
CCTAACAAGCCATCTGTCGTCCTCACATTGGAAGAGAGTGAGCTTCTAGAGAATCTTCTGAGC  
TTGAAGCTGAGTTAACTGTCAGTAGTGTCTCTGAAGAAAATCTTGTGGCCAGTGAGGATCAGGTT  
TCACTAAAAGCTTCTTGGATGCTGTTAGAAAATGCAGCTCAGGCAGCTGCACGGATACAAGCTGC  
TTTTCGTGCACATTCTTTTAGAAAACGGAAAGAAAGAGATGCTGCCGCCACAGTTCTAGATGGAT  
ATTGTATTGATGCAGGTAGCATTGATAATAACATTTCAAGTCTTCTGCCATGTCAAAACTTAGTT  
CTCAGAGCTGGCGTGATTACAAAGCTGCTTGTGCGATTGAGAAGAAATATCGAAATTGGAAAGG  
TCGTATAGAATTTCTTAGCATTGCGCCAGAAAATAGTTAAGATACAGGCTTGTGTGAGGGGTTACC  
AGGTTCCGAAGCAATACAAGCTAATATTATGGGCAGTTGGAATCTTGGACAAGGTTGTGTTACGA  
TGGCGGAGAAAACGAATTGGTATACAAAGTGTCCGGCAAGAAATGGAGTCAAATGAAGAAGAA  
AGTGATGATGCAGATTTTCTCAATGTGTTCCGGAAAGAGAAAGTAAATGCAGCAATTGAAAAGG  
CCTTGAAGCGGGTCTTTCCATGGTCCACTCCACTGGTGTCTGTCAGCAATATAGACGCTTGCTTT  
CGTTGTATCGTCAAGCCAAGATTGAACATGGCAGCACAAGTGATGAAGCACCGTTATCAACTTC  
GGAAGAGAATGCTTCCAATATGGAAGATGATGATTTGTGTCAATTTTTGGACACCTTCTTGGCC  
TTCTAG

>Glyma08G11080 (GmCAMTA15)

ATGACACCTGGTTACGAGTATGATATTAATGATCTGCATCAAGAGGCTCAAGCCAGATGGTTGAA  
GCCTGCAGAAGTGATGTACATTTTACAGAATCATGAAAAGTTCAGTTCACCCAAGAGGTCCCAC  
AACAGCCAACCAGTGGATCCCTGTTTCTGTTTAAACAAAAGAATCCTGCGATACTTCCGTAGAGAT  
GGTCATAACTGGCATAAGAAAAGTGGTGGAAAGAACTGTGGGAGAAGCACACGAAAGGCTGAAG  
GTTCTAAATGTTGAAGCCTTAAATTGTTACTATGCACGCGGAGAGCAGAACCCTGCTTTCCAGAG  
GCGGAGCTATTGGATGTTGGATCCGGCATATGAGCATATTGTTCTTGTGCATTATAGGAACACAA  
GTGAGGGAAAGCTAAGTTCTGGAGCTGGGGCACAATTGTCACCAAGTCTTCTGTCTATACTCAG  
AGTCCTAGCCCATATTCTACTCAGAATCCAGGGTCAACATCCATACTTGGTGATTTCATATGAACC  
TAATCAGAGTTTCTCCAGTCTGGGTCTACAAAAGTTACATCTGAGATATTCGTTCTGAACAATA  
AAATGGGTCACATGGATTGGGCAGATACAGAATCAGGAACCTCATCTGAACTCGAGGTTACTCA  
AGCTTTGCGCCGATTGGAGGTACAGTTAAGTTTGAATGAGGACAACCTTTGAAGATATTGTTTCCT  
CGGAGTAAGCATGAAACTGTTTCATGATTCAAATCCCAAGCACGATCAAAGGGTGATCAGCAAT  
CAAGAGCAATCTGCAGCTTCTCTAGACCCGATGATCAAGGGCTATTTTATGATGGATGTAATGG  
AAGGCAAGATCATGGTTACCCTGATGCAAATGAAAAGGCTTTATGGACAGAGCAGCTGGAATCA

CATAAGTCCTCATCTGCAGTCAAGTTACCTCAGAAAAATGTATACATGCCAGCTGAAAATGAAA  
ATTCAGTATCTTCTGCAAGAAGGGTACCAGTTTCCAACCAGGAAAACAGTCACTGGCTCAACTTC  
AACTGTAATAATTCTGAAAACCTCTGTTTTCTCACAACTCAAGGTGTTGATGAAGTCAAATTTCT  
GCCTATTCTTCTATGTTGGAAACACAAGTAATTAATTCTGACTACTATGAAACATTGTTTGACCAA  
AGCCAAATTGGAGCACCACCAGATGCAAATTCAGCTTGACTGTTGCACAAAAACAGAAATTTA  
CTATTAAGACTATCTCCCCAGAATGGGGTTATGCCACCGAGACTACCAAGGTCATTGTTGTTGGG  
TCTTTTCTCTGTATCCCTCGGATTCTGCATGGGCTTGTATGTTTGGTGTATGTTGAAGTTCCTATTG  
AGATAATTCAGGATGGTGTAAATCTCTTGTGAAGCTCCATCTCACCTTCTGGAAAGGTTACTCTGT  
GCATTACTTCTGGAAACTGGGAGTCCTGCAGTGAAGTCAGAGAGTTTGAATATCATGATAAGACC  
AATAGTTGCACTCGATGTAATCCGAAACAGAAGCCACTAGAAGTCCAGAAGAGCTGTTAT  
TACTTGTTAGATTAGGGCAGATGCTTCTTTCTGCATCAACAATAAAGAATGACAACATAGAATCT  
GGAATTCCTCTAATAAAACCGAAAGCTGATGATGATTCATGGAGCCATATTATAGATGCTCTTCT  
AGTTGGCAGTGGAAACGTCGAGTGGTACTGTTGATTGGCTTCTTGAAGAGCTTCTAAAGGATAAGT  
TTCAACAGTGGCTTTCTTTCAGATCACGGGAAAAAGATGAAGAGACAGGCTGCTCTTTGTCCAAG  
AAAGAGCAAGGGATTATTCACATGGTTGCTGGGTTAGGTTTTGAGTGGGCCTTGAACCCTATTCT  
CACGTGTGGAGTTAATATAAATTTCCGTGACATCAATGGATGGACTGCCCTTCAATGGGCTGCAC  
GTTTTGGAAGGGAAAAAATGGTTGCTTCACTTATAGCTTCTGGAGCATCTGCTGGAGCTGTGACA  
GATCCAAATGCACAAGATCCAACCTGGTAAAACCTGCTGCATCTATTGCAGCCAGCAGTGGGCACA  
AGGGACTGGCAGGGTATCTTTCAGAGATAGCTGTAACAAGCCATTTGTCATCGCTTACACTGGAA  
GAGAGTGAATCATCTAAAAGTTCTGCTTATCTTCAGGCGGATAGGACTGTTAACAGTGTCTCCAA  
GGAAAATCTTACTGCCAATGAGGATCAGGCGTCACTCAAAGATACCTTGGCTGCTATCAGAAAT  
GTAACCTCAGGCAGCTGCGCGGATACAATCTGCTTTTCGCTCACATTTCTTTTAGAAAACGGAGAGC  
AAGAGAAGCAACTGCTAGTACAGGTGGCATTGGTACCATTTTCAGAGATTTCTGCTATGTCAAAC  
TTGCGTTTTCGAACTCACACGAATATAATTCAGCTGCTTTATCCATTCAGAAGAAATATCGAGGT  
TGAAAGGTTCGTAGAGATTTCTTAGCATTGCGCCAAAAAGTAGTGAAGATACAGGCTCATGTGA  
GGGGTTACCAGGTTAGGAAGCATTACAAGGTAATATGGGCAGTTGGAATCTTGGACAAGGTTGT  
CCTACGATGGAGGAGAAAAGGAGCTGGTTTACGAGGTTTCCGACAAGAGATGGACATCAATGA  
AAATGAAGATGAAGATATTCTCAAGGTGTTCCGAAAACAGAAATTAGATGTAGAAATTGAAGAG  
GCTGTTTCAAGGGTGTGTCCATGGTTGACTCACCGGATGCTCGTGAGCAATATCATCGCATGCTT  
GAGAAATATCGTCAAGCTAAGGCTGAACTTGCGGGTACGAGTGACGAAGCATCATTATCAACTT  
CTGTAGGAGATGACTTATTTATGGATGATTTTTATCCATTTCCCTAA



## Proteomic sequences of Soybean CAMTA family

>Glyma.05G178200 (GmCAMTA1)

MAEARHYVPPSQLDIKQIILEAQHRWLRPAEICAILSNHKKFLIASEPAHMPPSGSLFLFDRKVLRYFRK  
DGHNWRKKKDGKTVREAHERLKAGSVDVLHCYYAHGEENENFRRTYWLLEEELSHIVLVHYRHVK  
GTKANFTCAKENEETLPYAQQTDKIMPKTEMETSLSTLHPSYQVPSQTMDRSMNSSQASEYEEAESA  
FNNHASSEFYFLELERPVEKITPQPADSYSPRPLTRKSVPMNCIIESGTDDQEKSPVIPGVNYISLTQDN  
KIKDIHNFGLTYESP KPLGFSSWEGILKNNAGSQHVFPQPLFPGTQPDNMGINSKFSQGHEIMVPYL TTS  
IAKQHENGSLIQAEGNWQAYDVDSL RMSSWPIDSA YSGSSCDITCSNREQEVNDVDLQKSLEQCLLHP  
YKQNKVFMQNDPQEKLLNEKEKIKSDLEANRILDGIEDTYFTFKRTL LDGSPAEEGLKKLDSFNQWMS  
KELADVEESNKPSTSGGYWDTVESENEVGNTTIP SQGHLDTYVLDPSVSHDQLFSIIDYSPSWAFEGSEIK  
VIISGRFLRSQHEAEQGWSCMFGVEVEVPAEIIAKGVLCCHTPPHKAGRVPFYVTC SNRLACSEVREFDF  
QVNYTPEVNTTGENRGSTFDTFSIRFGELLSLGHAF PQNSDSISVSEKSQLRSKINSLLREEEDDWDKLLK  
LTQEEDFSPENLQEQLLQNLKDKLHAWLLQKITEEGKGNILDEGGQGVLFHFAALGYDWALEPTIV  
AGVNVNFRDVNGWTALHWA AFCGRERTV AFLISLGAAPGALTDPCPEHPSGRTPADLASANGHKGI  
AGYLAESSLSAHLTTLDLNRDAGENS GAKVVQRVQNI AQVNDLDGLSYELSLKDSLAAVRNATHAAA  
RIHQVFRMQSFQRKQLKEYDDDKLGLSDERALS LKMNMKSHKSGRDEPVHAAAVRIQNKFRSWK  
GRREFLMIRQIRIVKIQAHVRGHQVRKSCGKI IWSVGILEKVILRWRRKGSGLRGFKPEANSEG TMIQDVS  
STDDDYDVLKEGRKQTEQRLQKALARV KSMVQYPEARDQYHRLLN VVTEIQENQVKHESSYNNSEEP  
REFGDLNDLEALLDEDIFMPTAT

>Glyma.08G135200 (GmCAMTA2)

MAEARLYAPPSQLDIKQIILEAQHRWLRPAEICAILGNYYKFRIAPEPAHMPPSGSLFLFDRKVLRHFRK  
DGHNWRKKKDGKTVREAHERLKAGSVDVLHCYYAHGEENENFQRRTYWLLEEELSHIVLVHYRQVK  
GTKANFTSAKENEESLPYAQQTDKIMPQTEMDTSLSTLHPSYQVPSKTVDTSMNSAQTSEYEEAESA  
FNNHASSEFYFLELQRPVEKISPQPADFYSPRPLINDQEKLP IIPGVNYISLTQDNKNKDILNAGLTYESP  
KPLGFSSWEGILENNAGSQHVHFQPLFPGTQPDNMGINSNF SQGEEIMVPYL TTSIAKQHENGSIKAE  
NWQVYDVDSL RMSSWPIDSA YSGSTCEVSCSNCEQEVNDVDFQKSLEQCLLHSHKQNKVLMQNDLQ  
EKLLENEKEKIKSNLEAYGIEDTYLSFKRTL LDGPPAEEGLKKLDSFNQWMSKELGDVEESNKPSTSGGY  
WDTVETENEVGNTTIP SQGHLDTYVLDPSVSHDQLFSIIDYSPSWAFEGSEIKVIISGEFLRSQHEAEQCK  
WSCMFGVEVEVPAVIIAKGVLCCHTPPHKAGRVPFYVTC SNRLACSEVREFDFQVHYTPEDTTGENRGST  
FDTFSIRFGELLSLGHAF PQNSDSISVSEKSQLRSKINSLLREDDDDWDKLLKLTQEEDFSPENLREQLLQ  
NLLKDKLHAWLLQKITEEGKGNVLDGEGQGVLFHFAAALGYDWALEPTIVAGVNVNFRDVNGWTSL  
HWA AFCGRERTV AFLISLGAAPGALTDPCPEHPSGRTPADLASANGHKGIAGYLAESSLSAHLTTLDL  
NRDAGENS GAKVVQRLQNI AQVNDLDGLSYELSLKDSLAAVCNATQAAARIHQVFRMQSFQRKQLK  
EYDDDKLGLSDERALS LKMNKSHKSGRDEPVHAAAIRIQNKFRSWKGRREFLMIRQIRIVKIQAHVR  
GHQVRKSCGKI IWSVGILEKVILRWRRKGSGLRGFKPEANSEG TMIQDVSSTDDDYDVLKEGRKQTEQ  
LQKALARV KSMVQYPEARDQYHRLLN VVTEIQENQVKHESSNNSEEPREFGDLNDLEALLDEDIFMP  
TAT

>Glyma.15G053600 (GmCAMTA3)

MAEGASYGLRRPLDIQQLQFEAQHRWLRPAEICEILRNRYRMF HITSEPHNRPPSGSLFLFDRKVLRYFRK  
DGHNWRKKKDGKTVKEAHEKLVGSDVLHCYYAHGEENENFQRRSYWMLEPDMMHIVFVHYLEV  
KGNKNIVVNEGDEVPTDSQKVTSPSSSLPTHSCVSSLSTDSVSP TSLMSLHEDADSEDIHHASSGLH  
PLHESQHSNGNSPLTEKIGAGSNSSYLMHPFGDNEQSSISGTDYVPVHGDKFRGNDTAYTDGQKPHG  
MAPWGTVLQSTAKLHNDPSLASFP SILPSSMGDVLEQEHTIFGDL LMSKSGL TEEAESSQSLQSNWQIPF  
EDNSGGMPMLTQTQSFGLQFRSDYGTGLLGNETRNASSEIAPILYSFHGEPKEQPMQONYPQELEDGQS

QHALKSNSANKVPDEETINYGLTVKSTLLDRDESLLKVD SFSRWITKELGEVADLNMQSSPGISWSTDE  
CQHVIDDTSLSPLSQDQLFSINDFSPKWAYA ESEIEVLIIGSFLKSQPEVTTCNWSCMFGEVEVPAEVL A  
DGILCCQAPCHKVGRVPFYVTC SNRLACSEVREFDFREGFARNVDFADFYISSTEMLRHLRLEDFLSLKP  
VDPSNHSFEGDMEKRNLIFKLISLREEEDYSIKDEV TRELDISQHMVKEHLFHRQFKEKLYSWLLHKVTE  
NGKGPVLEDEDGQGVHLHAAFLGYDWA INPIISAGVNINFRDVNGWTALHWAASCGRERTVA VLVS  
MGADCGALTDPSPAFPSGRTAADLASSYGHKGISGFLAESSLTHHLETLMDDQKGGQQEISGMKV VQ  
TVSERSATPVHYCDIPDAICLKDSLTA VRNATQAADRIHQVYRMQSFQRKQLTQYEGDDELGLSDQQA  
LSLLASRACKSGQGDGLANAAA VQIQKKFRGWKKRKEFLMIRQRVVKIQAHVRGHQIRKQYKPIIWSV  
GILEKVILRWRKGSGLRGFRPNAINKVPNQND SLKEDDYDYLKEGRKQKEEKIQKALS RVKSMVQY  
PEARAQYRRLN VVEDFRQTKASNKGLINSEETVDGVEDLIDIDMLLDDDNFIPIAFD

>Glyma.08G072100 (GmCAMTA4)

MSERSSFGLGPRLDLQQLQLEAQHRWLRPAEICEILRNYRMFQITSEPPNRPPSGSLFLFDRKVLRYFRKD  
GHNWRKKKDGKTVKEAHEKLVGSDV LHCYYAHGEENENFQRRSYWML ELDMMHIVFVHYLDV  
KVNKTNIGGKTYSDVTSDSQKSSSLSSGFPRNYGSMPSGSTDSMSPTSTL TSLCEDADSEDIHQASSGLH  
SYRESQNLGNDRPMDKIHARSNSSYLMHPFSDNHGQLPVSGAEYIPHVQGNKSRASDTTYIEGQRAHG  
IASWDNAMEQSAGKHADPSLVSSTSIPSSAMGNILDKNHTVPGNLLGHKIALTEVERGAQP VQSNWQI  
PFEDNTGELPNWGFTQSLGLEFGSDYGTSL LGDVTNAGPEIDPELFTFNGELKEQYTHGQSQPALKSN  
SAYEVPGEASINYALTMRRGLLDGEESLKKVDSFSRWMTKELAGVDDLHMQSSPGISWSTDECGDVID  
DTSLHLSLSQDQLFSINDFSPKWAYA ESEIEVLIVGTFLKSQPVVAKCNWSCMFGEVEVPAEVLADGILC  
CQAPPHKIGRVPFYVTC SNRFACSEVREFEYREGFDRNINFPDFNNSSEMELHLRLVGLLSLNSMHTLN  
QVFEQDMDKRNLIIFKLISLKEEEEYSKEETTAEMDISQQKLKEHMFHKQVKEKLYSWLLHKVTETGKG  
PLVLDEEGQGVHLHIAALGYDWA INPIITAGVNINFRDVNGWTALHWA AFCGRERTVA VLVSMDAA  
AGALTDPCPEFPLGRTPADLASSKGHKGISGFLAESLLTSHLES LTMDENKDG RKETS GMKV VQTVSER  
TATPVLNGDIPDDICLKDSLNAVRNATQAADRIYQVFRMQSFQRKQLALYEDDEFGLSDQQA LLSLAS  
KACRSGQGEGLANAAAIQIQKKFRGWTKRKEFLIIRQRIVKIQA HVRGHQVRKQYKPIIWSV GILEKVIL  
RWRKGSGLRGFRPASQNKVPEQPSESPKEDDYDYLKEGRKQSEVKFKKALS RVKSMVQYPEARAQYR  
RVLNVVEDFRQTKGGNLNLINSEETVDGVEDLIDIDMLLDDENFLPIAFD

>Glyma.05G117000 (GmCAMTA5)

MAERSCFGLGPRLDLQQLQLEAQHRWLRPAEICEILRNYQMFQITSEPPNGPPSGSLFLFDRKVLRYFRK  
DGHNWRKKKDGKTVKEAHEKLVGSDV LHCYYAHGEENENFQRRSYWML EPDMMHIVFVHYLD  
VKVNKTNVGGKTYSDVTSDSQKSSSLSSGFPRNYGSPVSGSTDSMSPTSTL TSLCEDADSEDIHQASSGL  
HSYRESQNLGNDRPMDKIDARSNSSYPMHPFSGDHGQLPVSGAEYIPHV LGDKSRASDTTYIEGQRAQ  
GIASWDNTMEQSAGEYADPSLVSSTTIPSSAVGNILEENHTVPGKLLGRKNALTEEERGSQP VQSNWQI  
PFEDNTGELPNWGFTQSLGLEFGSDYGASLLGDVTNAGPEIVPELFTFNGELKEQSVHQNF SKLYTHG  
QSQPTLKSNSEYEVPEASINYALTMRRGLLDGEESLKKVDSFSRWMTKEFAGVDDLHMQSSPGISWST  
DECGDVIDDTSLNLSLSQDQLFSINDFSPKWAYA ESEIEVLIVGTFLKSQPVVAKCNWSCMFGEVEVPAE  
VLADGILCCQAPPHKIGRVPFYVTC SNRFACSEVREFEYREGFDRNIQFADCFNNSTEMVLHLRLVGLLS  
LNSVRTSNQVFEQDMDKRS LIIFKLISLKEEEEYSKEETTAEMDISKHKLKELMFHKQVKEKLYSWLLHK  
VTETGKGPLVLDEEGQGVHLHIAALGYDWA INPIITAGVNINFRDVNGWTALHWA AFCGRERTVA VL  
VSMGAAAGAWTDPCPEFPSPGRSPADLASSKGHKGISGFLAESLLTGHLES LTMDENKDG RKETS GTKV  
VQTASERTATPVLYGDIPDAICLKDSLNAVRNATQAADRIYQVFRMQSFQRKQFAQYEDDEFGLSDQQ  
ALSLASKTCKSGQGEGLANAAAIQIQKKFRGWTKRKEFLIIRQRIVKIQA HVRGHQVRKQYKPIIWSV  
GILEKVILRWRKGSGLRGFRPAALNKVPEQPSESPKEDDYDYLKEGRKQSEVKFKKALS RVKSMVQY  
EARAQYRRV LNVVEDFRQTKGGNLNLINSEETVDGVEDLIDIDMLLDDENFLPIAFD

>Glyma.08G178900 (GmCAMTA6)

MAEGASYGLRRSLDIQQLQFEAQHRWLRPAEICEILRNYRMFHITSEPHNRPPSGSLFLFDRKVLRYFRK  
DGHNRWKKKDGKTVKEAHEKLGKGSVDVLHCYYAHGEENENFQRRSYWMLPEPDMMHIVFVHYLEV  
KGNKNIVNTEGDEIPSDSQKVTSSSSSLPTHSSVPSLSTDSVSPTTSLMSLREDADSEDIHQASSGLRPL  
YESQHSGNGPLTEKIGAGSNSSYLHPFSGDYEQSSISGTDYIPVVHGDKFRGNDTAYIDGQKTHDVAT  
WSTVLQSTAKLHNDPSLASSPSIPSSSMGDVLEQEHTIFSDLLMSKSGLTEVAESSQSLQSNWQIPFEDNS  
GGMPMLTQTQTFGLQFRSDYGTLLGNETRNACSESAAILYSFNGEPKEQPMQQNYLQLELEDGQSQH  
ALKSNSANKVPDEETINYGLTVKRTLLDKDESLKKVDSFSRWITKELGEVADLNMQSSPGISWSTDECQ  
HVIDDTSLSPLSQDQLFSINDFSPKWAYAESEIEVLIIGSFLKSQPEVTTCNWSCMFGEVEIPAKVLADGI  
LCCQAPRHKVG RVPFYVTC SNRLACSEVREFDFREGFARNVDFADFYNSSEILLHLRLEDFLSLKPVDP  
NHSFEGDMEKRNLIQQLISLREVEEYSIKDEVTTLEDISQHMVKEHLFHKQFKEKLYSWLLHKVTESGKG  
PNVLEDEDGQGVHLAAFLGYDWAINPIISAGVNIINFRDVNGWTALHWAASCGRERTVAVLVSMGAD  
CGALTDPSPPSPAGRTAADLASSYGHKGISGFLAESSLTHLETMTDDQKGGRQEISGMKAVQTVSER  
SATPVHFGDMPDLCLKDSLTA VRNATQAADRIHQVYRMQSFQRKQLTQYESDELGLSDQQALSLLASR  
ACKSGQGDLANAAA VQIQKFRGWKKRQEFLMIRQ RVAHVRGHQVRKQYKPIIWSVGILEKIILRW  
RRKGSGLRGFRPNVINEVPDQQNNSLKEDDYDYLKEGRKQKEEKIQKALS RVKSMAQYPEARAQYRRL  
LNVVEDFRQTKASNEGLINSEETVDGMEDLIDIDMLLDDDNFIPIAFD

>Glyma.17G038800 (GmCAMTA7)

MAETTKYIPNSQLELEEILNEAEHRWLRPAEICEILRNHKKFKLTPDPPVMPPAGSLFLFDRKALRYFRK  
DHRWRKKKDGKTVREAHEKLGKGSVDVLHCYYAHGEDNEYFQRRSYWMLDEQLEHIVLVHYREIK  
EGCKSGISHLPVVPVTLVGSSQNTSVLSSTKINSPISLVQTSFTSSANKVYQNGRASEHEDVNSKNGPQAS  
SHAQIPISNYVLHSAPWLTHEAAGFSELLRNPLISSWPSSFPSPYSGTGLSPWTSIQNSSRNTINMHDGKH  
HVEASEADLTVRKL SNAGLDSVHRMQDGVIFRDLITDMCVQPVIDLPTVNQV KNEHGLDSFHAQVH  
DHNDHPVVATTKILVEQKLQDGGLYNDESEQVEY GEMKKLDSFGRWMDKEIGGDCDNSLMASDSGN  
YWSTLDAHSEDKEVSSLRHMQLD VDSLGP SLSQEQLFSIHDFSPDWAYTGVRTKVLIVGTFLGSKKPSSE  
TKWGCMFGEIEVSAEVLADNVIRCQTPHSPGRVPFYITCSNRLACSEVREFEFDENPTKFLGPEGIKISP  
EEEVRLQMRLKLVDLGP DNKWLKCSVSECEKCKLKGTMYSVRDDSGVFEETFQIDGIGHINHRDILFQ  
RLVRDKLYEWLIYKVHEGGKGPVLDDEGQGVIIHLAAALGYVWAMAPLVAAGISPNFRDSRGRGL  
HWASYFGREETVIVLVQLGATPGAVEDPTSAFPRGQTAADLGSSRGHKGIAGYLAEADLTNQLSVLTV  
KENETGNIATTIAANSALQSVEDDSSMTMDEQH YLKESLAVFQKSAHAAASILA AFRARSFCQRQLA  
QSSSDISEVL DVVADSLSKVQNKGFEDYLHFAALKIQKRYRGWKGRKDFL KIRDRIVKIQAHIRGHQV  
RKQYKKV VWSVIVEKAILRWRK GAGLRGFRVGPVGVVVKDAEKSDEYEFLSIGRRQKSDDVKKAL  
DRVKSMVRNPEARQYMLIMKYEFKIDGGSQSQHV G

>Glyma.15G143400 (GmCAMTA8)

MMSHNL TGQLVSAEIHGFHTLEDLDVSN TMEEAKSRWLRPNEIHAILCNHKYFKINVKPVNLPKSGTI  
VLFDRKMLRNFRKDGHNWKKKTDGKTVKEAHEHLKVGNEERIHVYYAHGQDNPTFVRRCYWLLDK  
NLEHIVLVHYRDTQELQLQGSPATPVNSNSSASDPAASWIPSEDLD SGVNSAYAVELNDNL TAKSHE  
QRLHEINTLEWDDLVPVNTSTTSNGGNVPYSFQENQSLLSGRFGNVSSNPSAEIPSGNLTQPVSGS  
NSAPYSFPDSAILLKNSPISSGGVDTLGTLVNEGLQSQDSFGTWMNIISDTPCSIDESALKASISSVHVPYSS  
LVADNLQSSLPEQVFNLT EVSPTWASSTEKTKVLVTGYFHNNYENLAKSNLLCVC GDVSVVPEIVQVG  
VYRCCVPPHSPGLVNL YLSFDGHKPISQVVNF EYRTPILHEPTASMEEKYNWNEFRLQMRLAHL LFASD  
TSLNIFSSKVSPNALKEARRFSFKTSYISKSWQYLMKSIDDNTIPFSKVKDSL FETALKNKLKEWLLERILG  
RKSTEYDAQGQGVIIHL CAMLGYSWAISLFSWSGLSLDFRDKFGWTALHWAASYGMEKMVATLLSCG  
ARPNL VTDPTPQYPGGCTAADL AYMKGCDGLA AFLSEKSLVEQFNEMSLAGNISGSLETSSDTPVNAE  
NLTEDQLYVKETLAAYRISAEAAARIQA AFREHSFKLRYKAVEIISPEEEARQIV AAMRIQHAFRNYESK  
KKMTAAARIQHRFRTWKYRREFLNMRHQAIKQA AFRGFQARKQYRKIIWSVGVLEK VILRWRLKRG

FRGLQVNPAREETQESDSIAEEDFFRTGRKQAEERIERSVIRVQAMFRSKKAQEEYRRMKLTHNQAKLE  
LELEEFLDSEVDMLPKT

>Glyma.09G038300 (GmCAMTA9)

MMMSHNLTGQLVGAEIHGFHTLDDLDVSNMEEAKSRWLRPNEIHAILCNHKYFKINAKPVNLPKSG  
TIVLFDRKMLRNFRKDGHNWKKKTDGKTVKEAHEHLKVGNEERIHVYYAHGQDKPTFVRRCYWLLD  
KSLEHIVLVHYRDTQELQLQGS PATPVNSNSSVSDSAASWIPSDDLDSGVNSAYAVELNDSLAKSHE  
QRLHEINTLEWDDL VVSNANTSTTSNGGNVPYSFQQNQSLNNGSFGNVSSDPSAEIPSGNLTQLVSGS  
DSAPYSPFESADLLKSSPLSSGGVDTLGTLVNEGLQSQDSFGTWMNIMSDTPCSIDESALEATTSSVHV  
PYSSLVADNKQSSLPEQVFNLT EVSPVWASSTEKTKVLVTGYFHNNYQHLAKSNLLCVCGDVSPVEIVQ  
VGVYRCWVSPHSPGLVTL YLSFDGHKPIQVNFYRTPILHEPTALIEEKYNWDEFRLQMLLAHLLFAS  
DKSLNIFSSKVSTNALKEARRFSFKTSYISKSWQHLMKSIDDKTIPFSQVKDALFETS LKNKLKEWLLERII  
LGSKSTEYDAQGQAAIHL CAMLGYNWAISLFTW SGLSLDFRDKFGWTALHWAAYYGIEKMVATLLSC  
GARNLVTDPTPQYPGGCTAADLAYVKGCDGLAAYLSEKSLVEQFNDMSLAGNISGSLETSSTDPVNA  
ANLTEDQLYLKETLEAYRTAAEAAAARIQA AFREHSFKLRYQAVEIMSP EEARQIVAAMRIQHAFRNYE  
SKKKMAAAAARIQLRFRTWKYRREFLNMRRAIKIQAAFRGFQARKQYRKIVWSVGVLEK VILRWLLKR  
KGFRLQVNPAAEETQESDTIAEEDFFRTSRKQAEERVERS VIRVQAMFRSKKAQEEYRRMKLTHNQ  
A MLDELEEF LNSEDDMLPKT

>Glyma.05G148300 (GmCAMTA10)

MTPGYEYDINDLHQEAQARWLKPAEVMYILQNHEKFQFTQEPPQOPTSGSLFLFNKRVLRFRRKDG  
HNWRKKRDGRTVGEAHERLKVGNVEALNCYAHGEQNPTFQRRSYWMLDPAYDHIVLVHYRNTSEG  
KLSSGAGAQLSPSSSVYTQSPSPYSTQNP GSTSILGDSYEPNQSFSSPGSTEVTSDMFVLNNKMGMHMDG  
TDTESGTSPELEV TQALRRLEVQLSLNEDNFEDIVSFGSKHETTHDSNPQHDQRVISNQEQA AFSGPDD  
QGLFYDGYNGRQGDGGEFYHELIDHGYPDGNEKALWTEVLESCKSSSAVKLPQKNVYMPVENLENSV  
SSARRVPVSNQENSHWLNFNNSNSENSVFSQPQGVDEVKFPVYSSMVETQVINS DYYETLFDQSQIGAP  
PDANSSLTVAQKQKFTIKTISPEWGYATETTKVIVVGSLLCHP SDSAWACMFGDVEVPVEI IQDGVISCE  
APSHLPGKVTL CITSGNRESCSEVREFEYRDKTNSCTQCTQSETEATRSP EELLLLVRLEQMLLSASTIKN  
DNIESGIPLIKQKADDDSWSHIIEALLVSGSTSTGTVDWLL EELLKDKLQQLWLS CRSQEKDEETGCSLSK  
KEQGIH MVAGLGF EWALNPILTCGVNINFRDINGWTALHWAARFGREK MVASLIASGASAGAVTDP  
NAQDPTGKTAASIAAGNGHKGLAGYLSEIAVTSHLSSLTLEESELSKSSAELQADMTVNSVSKENLTAS  
EDQASLKDTLAAIRNVTQAAARIQSAFRSHSFRKRRAREVAASAGGIGTISEISAMSKLAFRNSREYNSA  
ASAALS IQKRYRGWKGRKDFLALRKKVVKIQAHV RGYQVRKH YKVIWAVGILDKVVL RWRK GAGL  
RGFRQEMDINENENEDEDILKVFRKQKVDVEIEEA VSRVLSMVDS PDAREQYHRM LEKYRQAKAELA  
GTSDEASLSTSVGDDL FIDDFYPPF

>Glyma.18G005100 (GmCAMTA111)

MPPGLEYNIDDLFQEAKRRWLKPV EVL YILRNHDQCEFTHQPPHQ P AGGSLLLFNRRIMRFRKDGHN  
WRKKKDGKTVGEAHERLKVGNVEILNCYAHGEENRTFQRRSYWMLPEYDHIVLVHYRETSEGKSK  
SEHVTQLSSGSSPVFSQSHSSYTTNPGTASMF GDSCEPNQKFSSSGSLEDTSEAQALRQLEEQLSLNEDI  
FNEIALDLIPGQDQRVYKQDNSVALSGPNDPGQPCDGYNGREDDSGTYHDFLDDCPGGNEKTIYW  
TEVLESCKPLSVTKLPDQHAYDAIENGKSLFSSGRGMIANREKNQWLNSNSN NVENS VFLFPQDIGVKF  
PPYSMVETPGTNYDYYETCFDQFQNQEPLGVDSSFTV VQKQKFTIRAVSPEYCYATETTKV IIGSFLCHD  
SDSTWACMFGDVEVPAEIIQDGVICCEAPSYLLGKVNLCVTSGNR VPCSEVRGFEFRNKTT SCTRNSLE  
TEGSKSLEDLLLVRFAEMLLSASTTKDDRIESG SYLSTEQKDDDDSWSHI IIDLTDGTRTSSDTVNWLL  
EELLKDKLQLWLSNRRDEGTGCSFSRKEQGIH MISGLGF EWALSPILSCGVNINFRDINGWTALHWA  
ARFGREK MVASLIASGASAGAVTDPSSQDPTGKTAASIAASHGHKGLAGYLSEV DLTSHLSSLTLEESELS

KGSSELEAELTVSSVSKENLVASEDQVSLQAFLDAVRNAAQAAARIQAAAFRAHSFRKRKEREAAADAG  
LDGYCIDAGSIDNNISVLSAVSKLSSQSCRDYNLAALSIQKKYRGWKGRKEFLALRQKVVKIQACVRGY  
QVRKQYKLILWAVGILDKVVLRRRKRIGIRSVRQEMESNEEESDDEDFLSVFRKEKVNAAIEKALKQV  
LSMVHSSGARQQYRRLLLLYRQAKAKTERGSTSDEAPLSTSEEEVSNMEDDDLCQFWETFWPS

>Glyma.17G031900 (GmCAMTA12)

MANNLAAQQLVGSEIHGFHTLQDLVDVGSIMEEARTRWLRPNEIHAMLCNYKYFTINVKPVNLPKSGTI  
VLFDRKMLRNFRKDGHNWKKKKDGKTVKEAHEHLKVGNEERIHVYYAHGQDNPNFVRRRCYWLLD  
KSMEHIVLVHYREIQEMQGSPTVPVNSHSSVSDPPAPWILSEEIDSGTTTAYAGDTSANINVKSHLRL  
HEINTLDWDDLVDANDHNTTTPNGGTVPYFDLQDQILLNDSFSNVANNLSADIPSGSLTQPIAGSN  
SVPYNFSSVNLQTMDDQANPHEQRNNTVSLSGVDSLDTLVNDRLQSQNSFGMWVNPIMSDSPCSVDD  
PALESPVSSVHEPYSSLIVDSQQSSLPGQVFTITDVSPTCVSSTEKSKVLVTGFFHKDYMHLKSNLLCVC  
DVSVP AEIVQVGVYRCWVSPHSPGFVNLYMSIDGHKPIQVNVFEYRTPALHDP AVSMEEEDNWDEFQ  
LQMRLAYLLFKQLNLDVISTKVSPNRLKEARQFALKTSFISNSWQYLIKSTEDNQIPFSQAKDALFGIALK  
SRLKEWLLERIVLGCKTTEYDAHGQSVIHLCAILGYTAVSLFSWSGLSLDFRDRSGWTALHWAAYCG  
REKMOVATLLSAGAKPNLVTDPTPQNPGGCTAADLAYMRGHDGLAAYLSEKSLVQHFNDMSLAGNIS  
GSLETSTTDPVISANLTEDQQNLKDTLAAAYRTAAEAASRIHAAFREHSLKLRTKAVASSHPEAQARKIV  
AAMKIQHAFRNHKTKKVMAAAARIQCTYRTWKIRKEFLNMRCQAVKIQA AFRCFQVRKHYCKILWS  
VGVVEKAVLRWRLKRRGFRGLQVKTVEAGTGDQDQQSDVEEEFFRAGRKQAEERVERSVVRVQAMF  
RSKKAQEEYRRMKLALDQAKLEREFERLLSTEVDMLKT

>Glyma.07G242000.1(GmCAMTA13)

MANNLAVQLVGSEMHGFHTLQDLVDVGSIMEEARTRWLRPNEIHAMLCNYKYFTINVKPVNLPKSGTI  
VLFDRKMLRNFRKDGHNWKKKKDGKTVKEAHEHLKVGNEERIHVYYAHGQDNPNFVRRRCYWLLD  
KSMEHIVLVHYRETQEMQGSPTVPVNSHSSVSDPPAPWILSEEIDSGTTTAYTGDMNNINVKSHLRL  
HEINTLEWDDLVDTNDHNASTVPNGGTVPYFDQDQDQILLNDSFGNVANNLSAEIPSGNLTQPIAGSN  
RVPYNFSESVTLQTMNDQANPHEQKNNTVSLSGVDSLDTLVNDRLQSQDSFGMWVNHIMSDSPCSVD  
DPALESPVSSIHEPYSSLVVDSESSLPEQVFTITDVSPTCVSSTEKSKVLVTGFFLKDYMHLKSNLLCVC  
GDVSVP AEIVQVGVYRCWVSPHSPGFVNLYLSIDGHKPIQVNVFEYRTPALHDP AVSMEEEDNWDEF  
RQQMRLAYLLFAKQLNLDVISSKVSPNRLKEARQFALKTSFISNSWQYLIKSTEDNQIPFSQAKDALFGIT  
LKNRLKEWLLERIVLGCKTTEYDAHGQSVIHLCAILGYNWAVSLFSWSGLSLDFRDRFGWTALHWAA  
YCGREKMOVATLLSAGAKPNLVTDPTPQNPGGCTAADLAYMRGHDGLAAYLSEKSLVQHFNDMSLAG  
NISGSLETSTTDPVNPANLTEDQQNLKDTLTAAYRTAAEAASRIHAAFREHSLKLRTKAVASSNPEAQAR  
KIVAAMKIQHAFRNHETKKMMAAAARIQCTYRTWKIRKEFLNMRRQAVKIQA AFRCFQVRKHYRKIL  
WSVGVVEKAVLRWRLKRRGFRGLQVKTVDAGTGDQDQQSDVEEEFFRTGRKQAEERVERSVVRVQA  
MFRSKKAQEEYRRMKLALNQAKLEREYEQLLSTEVDMLQ

>Glyma.11G251900 (GmCAMTA14)

MAGLEYSIDDLFQEAKRRLKPVVEALYILRNHDQCKFTHQPPHQPAGGSLFLFNRRIMRSFRKDGHN  
WRKKKDGKTVGEAHERLKVGNVEILNCYAHGEEENRTFQRRSYWMLEPEYDHIVLVHYRETSEGKSN  
SEHVTQLPSEVTFEAQRQLLEEQLSLNDDGFNEIALDLVSGDQQRVYKQDKSAALSGPNDLGQPCD  
GYNGRQDDSGTYHDFLDDCPGGNEKTIYWTKVLESCKPLSVTKLPDQHAYE AIGNENTLFSSGRGVI  
ANLENNQWLNSNSNNIENYGGVKFPYSLAETPGANSYYETFFDQFQNGGPLGVDSSLTVVQKQKF  
TIRAVSPEYCYSTETTKVIIIIGSFLCHDS DSTWACMFGDVEVPAEIIQDGIICCEAPSNHLGKVNLCITSGN  
RVPCSEMREFEFRNKTTSTRCNLSLETGSKSPEDLLLVRFAEMLLSSSTTKDDRIESGSHLSTEQKDDD  
DSWSHIIDTLLDSTRTPSDAVKWLLLELLKDKLQLWLSNRRDEGTGCSLSKKEQGIHIMVSGLGF EWAL

NPILSCGVNINFRDINGWTALHWAARFGREKMOVASLIASGASAGAVTDPSSQDPTGKTAASIAASHDH  
KGLAGYLSEVDLTSHLSSLTLEESELSRESSELEAELTVSSVSEENLVASEDQVSLKASLDAVRNAAQAAA  
RIQAAFRAHSFRKRKERDAAATVLDGYCIDAGSIDNNISVLSAMSKLSSQSWRDYKAALSIQKKYRNW  
KGRIEFLALRQKIVKIQACVIRGYQVRKQYKLLIWA V GILDKVVLRRRKRIGIQSVRQEMESNEEESDD  
ADFLNVFRKEKVNA AIEKALKRVLSMVHSTGARQQYRRLLSLYRQAKIEHGSTSDEAPLSTSEENASNM  
EDDDLCQFLDTFFWPS

>Glyma.08G105200 (GmCAMTA15)

MTPGYEYDINDLHQEAQARWLKPAEVMYILQNHEKFQFTQEVPPQPTSGSLFLFNKRILRYFRRDGHN  
WHKKSGRRTVGEAHERLKVLNVEALNCYYARGEQNPAFQRRSYWMLDPAYEHIVLVHYRNTSEGKL  
SSGAGAQLSPSSSVYTQSPSPYSTQNPGSTSILGDSYEPNQSFSSPGSTKVTSEIFVLNNKMGHMDWADTE  
SGTSSELEVTQALRRLEVQLSLNEDNFEDIVSFGSKHETVHDSNPKHDQRVISNQEQA AFSRPDDQGLF  
YDGCNGRQDHGYPDANEKALWTEQLESHKSSSAVKLPQKNVYMPAENENSVSSARRVPVSNQENSH  
WLNFCNNSSENSVFSQPQGVDEVKFPAYSSMLETQVINSYYETLFDQSQIGAPPDANSSLTVAQKQK  
FTIKTISPEWGYATETTKVIVVGSFLCHPSDSA WACMFGDVEVPIEIIQDGVISCEAPSHLPGKVTLCITSG  
NWESCSEVREFEYHDKTNSCTRCTQSETEATRSPEELLLL VRLGQMLLSASTIKNDNIESGIPLIKPKADD  
DSWSHIIDALLVSGTSSGTVDWLLEELLKDKFQQWLSFRSREKDEETGCSLSKKEQGIIHMAVAGLGE  
WALNPILTCGVNINFRDINGWTALHWAARFGREKMOVASLIASGASAGAVTDPNAQDPTGKTAASIAA  
SSGHKGLAGYLSEIAVTSHLSSLTLEESESSKSSAYLQADRTVNSVSKENLTANEDQASLKDTLAAIRNVT  
QAAARIQSAFRSHSFRKRRAREATASTGGIGTISEISAMSKLAFRNSHEYNSAALSIQKKYRGWKRRDF  
LALRQKVVKIQAHVIRGYQVRKHYKVIWAVGILDKVVLRRRKGAGLRGFRQEMDINENEDILKVF  
RKQKLDVEIEEA VSRVLSMVDSPDAREQYHRMLEKYRQAKAELAGTSDEASLSTSVGDDLFMDDFYFP  
P

**Protein sequences (of CAMTA family of Arabidopsis, soybean, tomato and maize) for phylogenetic tree**

>AtCAMTA1

MARKKKSVSFSLDIARNENKIIISFSVHAYS DRLGFVDSLFDYESLRSLLVDFWVYPSMVDRRSFGSITP  
PLQLDMEQLLSEAQHRWLRPTEICEILQNYHKFHIASESPTRP ASGSLFLFDRKVLRYFRKDGHNWRKK  
KDGKTIREAHEKLVKGSIDVLHCYYAHGEANENFQRRCYWMLEQYYYRKASSHWVLVATLSLFSFGYL  
RPSWVRHLMHIVFVHYLEVKGNRTSIGMKENNSNSVNGTASVNIDSTASPTSTLSSLCEDADTVLVQGI  
VNKQVPSYDHLNLKLEIAMVGHLLACVMFHRFMGTESEKMQPSNTDSMLVEENSEKGGRLKAEHI  
RNPLQTQFNWQDDTDLALFEQSAQDNFETFSLLGSENLQPFGISYQAPPSNMDSEYMPVMKILRRSED  
SLKKVDSFSKWA I KELGEMEDLQMQRGDIAWTTVECETAAAGISLSPSLSEDQRFTIVDFWPKSAKT  
AEVEVMVIGTFLLSPQEVTKYNWSCMFGVEVEVPAEILVDGVLCC HAPPHTAGHVPPFYVTC SNRFACSE  
VREFDFLSGSTQKINATDVYGYTNEASLQLRFEKMLAHRDFVHEHHIFEDVGDKRRQISKIMLLKEEK  
EYLLPGTYQRDSTKQEPKGQLFRELFEELYIWLHKVTEEGKGNILDEDGQILHFVAALGYDWA I KP  
VLAAGVNINFRDANGWSALHWA A FSGREETVA VL VSLGADAGALTDPSPPELPGKTAADLAYANGH  
RGISGFLAESSLTSYLEKLTVD SKENSPANSCGEKAVQTVSERTAAPMTYGDVPEKLSLKDSLTA VRNAT  
QAADRLHQVFRMQSFQRKQLCDIGDDEKIDISDQLAVSFAASKTKNPGQGDVLSCAATHIQKKYRG  
WKKRKEFLLRQIVKIQAHVIRGHQVRKQYRTVIWSVGLLEKIILWRRKGNGLRGFKRNAVAKTVEP  
EPPVSAICPRIPQEDDYDKYGRKQTEERLQKALTRVKSVMVQYPEARDQYRRLTVVEGFRENEASSA  
SINNKEEEAVNCEEDDFIDIESLLNDDTLMMMSISP

>AtCAMTA2

MADRGSGFGAPRLDIKQLLSEAQHRWLRPAEICEILRNHQKFHIASEPPNRPPSGSLFLFDRKVLRYFRK  
DGHNRWKKKDGKTVKEAHEKLVGSIDVLHCYYAHGEDNENFQRRCYWMLEQDLMHIVFVHYLEV  
KGNRMSTSGTKENHSNSLSGTGSVNV DSTATRSSLPLCEDADSGDSRQASSSLQQNPEPQTVVPPQIM  
HHQNASTINSYNTTSVLGNRDGWTSAHGNRVKGSNSQRSQSDVPAWDASFENSLARYQNL PYNAPLT  
QTQPSTFGLIPMEGKTEKGSLLTSEHLRNPLQSQVNWQTPVQESVPLQKWPMDSHSGMTDATDLALFG  
QGAHENFGTFSSLLGSQDQQSSSFQAPFTNNEAAYIPKLGPEDLIYEASANQTLPLRKALLKKEDSLKKV  
DSFSRWVSKELGEMEDLQMQSSSGIAWTSVECENAAAGSSLSPLSEDRFTMIDFWPKWTQTDSEVE  
VMVIGTFLLSPQEVTSYSWSCMFGVEVEVPADILVDGVLCCHAPPHEVGRVPFYITCSDRFSCSEVREFDFL  
PGSTRKLNATDIYGANTIETSLHLRFENLLALRCSVQEHHIFENVGEKRRKISKIMLLKDEKEPPLPGTIE  
KDLTELEAKERLIREEFEDKLYLWLIHKVTEEGKGNILDEDGQGVHLHAAALGYDWAIPILAAGVSI  
NFRDANGWSALHWAASFSGREDTVAVLVSLGADAGALADPSPEHPLGKTAADLAYGNHGRGISGFLA  
ESSLTSYLEKLTVDAKENSSADSSGAKAVLTV AERTATPMSYGDVPETLSMKDSLTAVLNATQAADRL  
HQVFRMQSFQRKQSELGGDNKFDISDELAVSFAAAKTKKSGHSSGAVHAAA VQIQKKYRGWKKRKE  
FLLIRQRIVKIQAHVRGHQVRKQYRAIIWSVGLLEKIILRWRRKGSGLRGFKRDTISKPTPEVCPAPQEDD  
YDFLKEGRKQTEERLQKALTRVKSMAQYPEARAQYRRLTVVEGFRENEASSSSALKNNTTEEAANYNE  
EDDLIDIDSLLDDDTFMSLAFE

>AtCAMTA3

MAEARRFSPVHELVDVGQILSEARHRWLRPPEICEILQNYQRFQISTEPPTTPSSGVSVMFDRKVLRYFRKD  
GHNWRKKKDGKTVKEAHERLKAGSDVLHCYYAHGQDNENFQRRSYWLLQEELSHIVFVHYLEVKG  
SRVSTSFNRMQRTEDAARSPQETGDALTSEHDGYASCSFNQNDHSNHSQTTDSASVNGFHSPELEDAE  
SAYNQHGSS TAYSHQELQQPATGGNLTGFD PYYQISLTPRDSYQKELRTIPVTDSSIMVDKSKTINSPGV  
TNGLKNRKSIDSQTWEEILGNCGSGVEALPLQPNSEHEVLDQILESSFTMQDFASLQESMVKSQNQELN  
SGLTSDRTVWFQGDME LNAINLASNEKAPYLSTMKQHLLHGALGEEGLKKMDSFNRWMSKELGD  
VGVIADANESFTQSSSRTYWEEVESEDGSNGHNSRRDMDGYVMSPSLSKEQLFSINDFSPSWAYVGCEV  
VVFVTGKFLKTREETEIGEWSCMFGQTEVPADVISNGILQCVAPMHEAGRVPFYVTC SNRLACSEVREF  
EYKVAESQVFDREADDESTIDILEARFVKLLCSKSENTSPVSGNDSDSLQSEKISLLLFENDDQLDQML  
MNEISQENMKNNLLQEFLKESLH SWLLQKIAEGGKGPSVLDEGGQGVLFHFAASLGYNWALEPTIAGV  
SVDFRDVNGWTALHWA AFFGRERIIGSLIALGAAPGTLTDPNPDFPSGSTPSDLAYANGHKGIAGYLSE  
YALRAHVSLLSLNDKNAETVEMAPSPSSSLTDSLTA VRNATQAAARIHQVFRAQSFQKKQLKEFGDK  
KLG MSEERALSMLAPKTHKSGRAHSDDSVQAAAIRIQNKFRGYKGRKDYLITRQRIIKIQAHVRGYQFR  
KNYRKIIWSVGVLEK VILRWRRKGAGLRGFKSEALVEKMQDGT EKEEDDDFFKQGRKQTEDRLQKAL  
ARVKSMVQYPEARDQYRRLLN VVNDIQESKVEKALENSEATCFDDDDDLIDIEALLEDDDTLMLPMSS  
SLWTS

>AtCAMTA4

MSSVAEDNSFTCDIATIFVAICRNPPANPSDSL FQYEISTLYQEAHSRWLKPPEVLFILQN HESLTLTNTA  
PQRPTSGSLLLFNKRVLKFFRKDGHQWRRKRDRGRAIAEAHERLKVGNAEALNCYYAHGEQDPTFRRI  
YWMLDPEYEHIVLVHYRDV SEREEGQQTGGQVYQFAPILSTQNVSYNQYIGDSSDIYQQSSTSPGVAEV  
NSNLEGSASSSEFGQALKMLKEQLSIGDEHVNSVDPHYIQPESLDSLQFLEYS DIDHLAQPTTVYQRPEN  
NKLERCYGGNFGAQYSAKNDSNKLERCYGGYVGGAEYHSSNLMLVKNGSGPSGGTGGSGDQGSSEW  
KDVLEACEASIPLNSEGSTPSSAKGLLAGLQEDSNWSYSNQVDQSTFLLPQDLG SFQLPASYSALVAPEN  
NGEYCGMMEDGMKIGL PFEQEMRVTGAHNQKFTIQDISPDWGYANETTKVIII GSFLCDPTESTWSCM  
FGNAQVPFEIIEG VIRCEAPQCGPGKVNLCITSGDGLLCSEIREFEYREKPDTCPCPKCSEPQTS DMSTSP

NELILLVRFVQTLLSDRSSERKSNLESGNDKLLTKLKADDDQWRHVIGTIIDGSASSTSTVDWLLQELLK  
DKLDTWLSSRSCDEYITCSLSKQEQQIIHMVAGLGFWEAFYPILAHGVNVDFRDIKGWSALHWAAQF  
GSEKMVAALIASGASAGAVTDPSPRQDPNGKTAASIAASNGHKLAGYLSEVALTNHLSLTLLEETENS  
KDTAQVQTEKTLNSISEQSPSGNEDQVSLKDTLAAVRNAAQAARIAAFRAHSFRKRKQREAALVA  
CLQEYGMYCEDIEGISAMSKLTFGKGRNYNSAALSIOKNFRGYKDRKCFLELRQKVVKIQAHVIRGYQIR  
KNYKVICWAVRILDKVVLWRWRKGVGLRGRQDVESTEDSEDEDILKVFRKQKVDVAVNEAFSRVLSM  
SNSPEARQQYHRVLKRYCQTKAELGKTETLVGEDDDGLFDIADMEDTLFSLP

>AtCAMTA5

MAGVDSGKLGISEIHGFHTLQDLDIQTMLDEAYSRWLRPNEIHALLCNHKFFTINVKPVNLPKSGTIVL  
FDRKMLRNFRKDGHNWKKKDKGKTIKEAHEHLKVGNEERIHVYYAHGEDTPTFVRRCYWLLDKSQE  
HIVLVHYRETHEVHAAPATPGNSYSSSITDHLSPKIVAEDTSSGVHNTCNTGFVRSNSLGSRNHEIRLH  
EINTLDWDELLVPADISNQSHPTTEEDMLYFTEQLQTAPRGSVKQGNHLAGYNGSVDIPSPGLEDPVYQ  
NNNSCGAGEFSSQSHSCGVDPNLQRRDFSATVTDQPGDALLNNGYGSQDSFGRWVNNFISDSPGSVD  
DPSLEAVYTPGQDSSPTVTFHSHSDIPEQVFNITDVSPAWAYSTEKTKILVTGFFHDSFQHLGRSNLIC  
GELRVPAEFLQMGVYRCFLPPQSPGVVNLVLSVDGNKPISQLFSFEHRSVQFIEKAIPQDDQLYKWEFE  
FQVRLAHLFTSSNKISVLTSKISPENLLEAKKLASRTSHLLNSWAYLMKSIQANEVFPDQARDHLFELT  
LKNRLKEWLLEKVIENRNTKEYDSKGLGVIHLCAVLGYTWSILLFSWANISLDFRDKQGWALHWAA  
YYGREKMVAALLSAGARPNLVTDPTKEFLGGCTAADLAQQKGYDGLAAFLAEKCLVAQFKDMQTAG  
NISGNLETIKAESSNPGNANEEEEQSLKDTLAAAYRTAAEAAAARIQGAFREHELKVRSSAVRFASKEEEA  
KNIIAAMKIQHAFRNFEVRRKIAAAARIQYRFQTKMRREFLNMRKKAIRIQAAFRGFQVRRQYQKIT  
WSVGVLEKAILRWRLKRKGRGLQVSQPDEKEGSEAVEDFYKTSQKQAEERLERSVVKVQAMFRSKKA  
QQDYRRMKLAHEEAQLEYDGMQELDQMA TEES

>AtCAMTA6

MDGDGLGRLIGSEIHGFHTLQDLDVQTMLEEAKSRLWRPNEIHAILYNPKYFTINVKPVNLPNSGRILF  
DRKMLRNFRKDGHNWKKKDKGRTVKEAHEHLKVGNEERIHVYYAHGEDNTTFVRRCYWLLDKARE  
NIVLVHYRDTQEAATTSGDISSSIPVSEQTFPNRVAEDIDTVVRNHDISLHDINTLDWDELLVPTDLN  
NQSAPTVDNLSYFTEPLQNAANGTAEHGNATVADGSLDALLNDGPQSRESFGRWMNSFISESNGSLE  
DPSFEPVMMPRQDPLAPQAVFHSHSNIPEQVFNITDVSPAWAYSSEKTKILVTGFLHDSYQHILERSNLY  
CVCGDFCVPAEYLQAGVYRCIIPPHSPGMVNLVLSADGHKPIQCFRFEHRAVPVLDKTVPEDNQDSK  
WEEFEFQVRLSHLLFTSSNKLNLVSSKISPHNLRDAKKLASKTNHLLNSWAYLVKSIQGNKVSFDQAKD  
HLFELS LKNRLKEWLMEKVLEGRNTLDYDSKGLGVIHLCASLGYTWSVQLFSLGSLNFRDKQGWTA  
LHWAAYYGREKMVAALLSAGARPNLVTDSTKDNLGGCMAADLAQQNGYDGLAAYLAEKCLVAQF  
RDMKIAGNITGDLEACKAEMLNQGTLPEDQSLKDALAAAYRTAAEAAAARIQGAFREKALKAAARSSVI  
QFANKEEEAKSIIAAMKIQNAFRKYDTRRKIEAAAYRIQCRFQTKIRREYLNMRRAIRIQAAFRGLQA  
RRQYKILWSVGVLEKAVLRWRQKRKGRGLQVAAEEDSPGEAQEDFYKTSQRQAEERLERSVVRVQ  
AMFRSKKAQQDYRRMKLTHEEAQLEYGCLEDI

>GmCAMTA1

MAEARHYVPPSQLDIKQIILEAQHRWLRPAEICAILS NHKKFLIASEPAHMPPSGSLFLFDRKVLRYFRK  
DGHNRWKKKDKGKTVREAHERLKAGSVDVLHCYYAHGEENENFRRRTYWLLLEEELSHIVLVHYRHVK  
GTKANFTCAKENEETLPYAQQTDKIMPKTEMETSLSSTLHPSYQVPSQTMDRSMNSSQASEYEEAESA  
FNNHASSEFYFLELERPVEKITPQPADSYSRPLTRKSVPMNCIIESGTDDQEKSPVIPGVNYISLTQDN



KIKDIHNFGLTYESP KPLGFSSWEGILKNNAGSQHVFPQLFPGTQPDNMGINSKFSQGHEIMVPYLTT  
IAKQHENGSLIQAEGNWQAYDVDSL RMSSWPIDSA YSGSSCDITCSNREQEVNDVDLQKSLEQCLLHP  
YKQNKVFMQNDPQEKLLNEKEKIKSDLEANRILDGIEDTYFTFKRTL LDGSPAEEGLKKLDSFNQWMS  
KELADVEESNKPSTSGGYWDTVESENEVGNTTIP SQGHLDTYVLDPSVSHDQLFSIIDYSPSWAFEGSEIK  
VIISGRFLRSQHEAEQGWSCMFGEVEVPAEIIAKGVLCCHTPPHKAGRVPFYVTCSNRLACSEVREFDF  
QVNYTPEVNTTGENRGSTFDTFSIRFGELLSLGHAF PQNSDSISVSEKSQLRSKINSL LREEEDDWDKLLK  
LTQEEDFSPENLQEQLLQNLKDKLHAWLLQKITEEGKGNILDEGGQGVLFHAFASALGYDWALEPTIV  
AGVNVNFRDVNGW TALHWA AFCGRERTV AFLISLGAAPGALTDPCPEHPSGRTPADLASANGHKGI  
AGYLAESSLSAHLTTLDLNRDAGENS GAKVVQRVQNI AQVNDLDGLSYELSLKDSLAAVRNATHAAA  
RIHQVFRMQSFQRKQLKEYDDDKLGLSDERALS LKMNMKSHKSGPRDEPVHAAAVRIQNKFRSWK  
GRREFLMIRQRIVQIAHVRGHQVRKSCGKI IWSVGILEKVILRWRRKGSGLRGFKPEANSEGTM IQDVS  
STDDDYDVLKEGRKQTEQR LQKALARVKSMVQYPEAR DQYHRLN NVTEIQENQVKHESSYNNSEEP  
REFGDLNDLEALLDEDIFMPTAT

>GmCAMTA2

MAEARLYAPPSQLDIKQIILEAQHRWLRPAEICA ILGNYKKFRIAPEPAHMPPSGSLFLFDRKVL RHFRK  
DGHNWRKKKDGKTVREAHERLKA GSVDLVHCY YAHGEENENFQRRTYWLLEEELSHIVLVHYRQVK  
GTKANFTSAKENEESLPYAQQTDKIMPQTEMDT SLSSTLHPSYQVPSKTVDTSMNSAQ TSEYEEAESA  
FNNHASSEFYSLFELQRPVEKISPQPADFYSPR PLINDQEKLPIIPGVNYISLTQDNKNKDILNAGLTYESP  
KPLGFSSWEGILENNAGSQHVHFQPLFPGTQPDN MGINSNFSQGEEIMVPYLTTIAKQHENGSIKAEG  
NWQVYDVDSL RMSSWPIDSA YSGSTCEVSCSNCEQEVNDVDFQKSLEQCLLHSHKQNKVLMQNDLQ  
EKLLNEKEKIKSNLEAYGIEDTYLSFKRTL LDGPPAEGLKKLDSFNQWMSKELGDVEESNKPSTSGGY  
WDTVETENEVGNTTIP SQGHLDTYVLDPSVSHDQLFSIIDYSPSWAFEGSEIKVIISGEFLRSQHEAEQCK  
WSCMFGEVEVPAVIIAKGVLCCHTPPHKAGRVP FYVTCSNRLACSEVREFDFQVHYTPEDTTGENRGST  
FDTFSIRFGELLSLGHAF PQNSDSISVSEKSQLRSKINSL LREDDDDWDKLLKLTQEKFSPENLREQLLQ  
NLLKDKLHAWLLQKITEEGKGNVLDDEGGQGVLFHAAA LGYDWALEPTIVAGVNVNFRDVNGW TSL  
HWA AFCGRERTV AFLISLGAAPGALTDPCPEHPSGRTPADLASANGHKGIAGYLAESSLSAHLTTLDL  
NRDAGENS GAKVVQRVQNI AQVNDLDGLSYELSLKDSLAAVCNATQAAARIHQVFRMQSFQRKQLK  
EYDDDKLGLSDERALS LKMNKSHKSGPRDEPVHAAAIRIQNKFRSWKGRREFLMIRQRIVQIAHVR  
GHQVRKSCGKI IWSVGILEKVILRWRRKGSGLRGFKPEANSEGTM IQDVSSTDDDYDVLKEGRKQTEQR  
LQKALARVKSMVQYPEAR DQYHRLN NVTEIQENQVKHESSNNSEEPREFGDLNDLEALLDEDIFMP  
TAT

>GmCAMTA3

MAEGASYGLRRPLDIQQLQFEAQHRWLRPAEICEILRNYRMFHITSEPHNRPPSGSLFLFDRKVLRYFRK  
DGHNWRKKKDGKTVKEAHEKLVGSVDV LHCY YAHGEENENFQRRSYWMLEPDMMHIVFVHYLEV  
KGNKNIVVNNEGDEVPTDSQKVTSPSSSLPTHSCVSSLSTDSVSP TSLMSLHEDADSEDIHHASSGLH  
PLHESQHSGNSPLTEKIGAGSNSSYLMHPFSGDNEQSSISGTDYVPVHGDKFRGNDTAYTDGQKPHG  
MAPWGTVLQSTAKLHNDPSLASFPSILPSSMGDVLEQEHTIFGDLLMSKSGLTEEAESSQSLQSNWQIPF  
EDNSGGMPMLTQTQSFGLQFRSDYGTLLGNETRNASSEIAPILYSFHGEPKEQPMQQNYPQELEDGGQ  
QHALKSNSANKVPDEETINYGLTVKSTLLDRDES LKKVDSFSRWITKELGEVADLNMQSSPGISWSTDE  
CQHVIDDTSLSPLSQDQLFSINDFSPKWAYAESEIEVLIIGSFLKSQPEVTT CNWSCMFGEVEVPAEVL A  
DGILCCQAPCHKVGRVPFYVTCSNRLACSEVREFDFREGFARNVDFADFYISSTEMLRHLRLEDFLSLKP  
VDPSNHSFEGDMEKRNLIFKLISLREEEDYSIKDEV TRELDISQHMVKEHLFHRQFKEKLYSWLLHKVTE

NGKGPVNLDEDEGQGVHLHAAFLGYDWA INPIISAGVNI NFRDVNGWTALHWAASCGRERTVA VLVS  
MGADCGALTDPSPAFPGRTAADLASSYGHKGISGFLAESLTHHLETMTMDDQKGGQQEISGMKVVQ  
TVSERSATPVHYCDIPDAICLKDSLTA VRNATQAADRIHQVYRMQSFQRKQLTQYEGDDELGLSDQQA  
LSLLASRACKSGQGDGLANAAAVQIQKKFRGWKKRKEFLMIRQRVVKIQAHVRGHQIRKQYKPIIWSV  
GILEKVILRWRRKGSGLRGFRPNAINKVPNQNDLSEEDDYDYLKEGRKQKEEKIQKALS RVKSMVQY  
PEARAQYRRLLNVVEDFRQTKASNKGLINSEETVDGVEDLIDIDMLLDDDNFIPIAFD

>GmCAMTA4

MSERSSFGLGPRLDLQQLQLEAQHRWLRPAEICEILRNYRMFQITSEPPNRPPSGSLFLFDRKVLRYFRKD  
GHNWRKKKDGKTVKEAHEKLVGSDVVLHCYYAHGEENENFQRRSYWMLELDMMHIVFVHYLDV  
KVNKTNIGGKTYSDVTSQKSSSLSSGFPRNYGSMPSGSTDSMSPTSTLTSLCEDADSEDIHQASSGLH  
SYRESQNLGNDRPMDKIHARSNSSYLMHPFSDNHGQLPVSGAEYIPHVQGNKSRASDTTYIEGQRAHG  
IASWDNAMEQSAGKHADPSLVSSTIPSSAMGNILDKNHTVPGNLLGHKIALTEVERGAQPVSQSNWQI  
PFEDNTGELPNWGFTQSLGLEFGSDYGTSLLDGVTNAGPEIDPELFTFNGELKEQYTHGQSQPALKSN  
SAYEVPGEASINYALTMRRGLLDGEESLKKVDSFSRWMTKELAGVDDLHMQSSPGISWSTDECGDVID  
DTSLHLSLSQDQLFSINDFSPKWAYAESEIEVLIVGTFLKSQPVVAKCNWSCMFGEVEVPAEVLADGILC  
CQAPPHKIGRVPFYVTC SNRFACSEVREFEYREGFDRNINFPDFNNSSEMELHLRLVGLLSLNSMHTLN  
QVFEQDMDKRNLIKLSLKEEEEYSSKEETTAEMDISQQKLEHMFHKQVKEKLYSWLLHKVTETGKG  
PLVLDEEGQGVHLHIAALGYDWA INPIITAGVNI NFRDVNGWTALHWA AFCGRERTVA VLVSMDAA  
AGALTDPCPEFPLGRTPADLASSKGHKGISGFLAESLTSLESLTMDENKDGRKETS GMKVVQTVSER  
TATPVLNGDIPDDICLKDSLNA VRNATQAADRIYQVFRMQSFQRKQLALYEDDEFGLSDQQA LLSLLAS  
KACRSQGQEGLANAAAIQIQKKFRGWTKRKEFLIIRQRIVKIQAHVRGHQVRKQYKPIIWSVGILEKVIL  
RWRRKGSGLRGFRPASQNKVPEQSPESPKEDDYDYLKEGRKQSEVKFKKALS RVKSMVQYPEARAQYR  
RVLNVVEDFRQTKGGNLNLINSEETVDGVEDLIDIDMLLDDDENFLPIAFD

>GmCAMTA5

MAERSCFGLGPRLDLQQLQLEAQHRWLRPAEICEILRNYQMFQITSEPPNGPPSGSLFLFDRKVLRYFRK  
DGHNWRKKKDGKTVKEAHEKLVGSDVVLHCYYAHGEENENFQRRSYWMLEPDMMHIVFVHYLD  
VKVNKTNVGGKTYSDVTSQKSSSLSSGFPRNYGSPVSGSTDSMSPTSTLTSLCEDADSEDIHQASSGL  
HSYRESQNLGNDRPMDKIDARSNSSYPMHPFSGDHGQLPVSGAEYIPVLDGKSRASDTTYIEGQRAQ  
GIASWDNTMEQSAGEYADPSLVSSTIPSSAVGNILEENHTVPGKLLGRKNALTEEERGSQPVSQSNWQI  
PFEDNTGELPNWGFTQSLGLEFGSDYGASLLGVTNAGPEIVPELFTFNGELKEQSVHQNFSLYTHG  
QSQPTLKSNSEYVPEASINYALTMRRGLLDGEESLKKVDSFSRWMTKEFAGVDDLHMQSSPGISWST  
DECGVIDDTSLNLSLSQDQLFSINDFSPKWAYAESEIEVLIVGTFLKSQPVVAKCNWSCMFGEVEVPAE  
VLADGILCCQAPPHKIGRVPFYVTC SNRFACSEVREFEYREGFDRNIQFADCFNNSTEMVLHLRLVGLLS  
LNSVRTSNQVFEGDMDKRSLIKLSLKEEEEYSSKEETTAEMDISKHKLKELMFHKQVKEKLYSWLLHK  
VTETGKGPLVLDEEGQGVHLHIAALGYDWA INPIITAGVNI NFRDVNGWTALHWA AFCGRERTVA VL  
VSMGAAAGAWTDPCEFPSPGRSPADLASSKGHKGISGFLAESLTTGHLESLESLTMDENKDGRKETS GTKV  
VQTASERTATPVL YGDIPDAICLKDSLNA VRNATQAADRIYQVFRMQSFQRKQFAQYEDDEFGLSDQQA  
ALSLLASKTCKSGQEGLANAAAIQIQKKFRGWTKRKEFLIIRQRIVKIQAHVRGHQVRKQYKPIIWSV  
GILEKVILRWRRKGSGLRGFRPAALNKVPEQSPESPKEDDYDYLKEGRKQSEVKFKKALS RVKSMVQY  
EARAQYRRV LNVVEDFRQTKGGNLNLINSEETVDGVEDLIDIDMLLDDDENFLPIAFD

>GmCAMTA6

MAEGASYGLRRSLDIQQLQFEAQHRWLRPAEICEILRNYRMFHITSEPHNRPPSGSLFLFDRKVLRYFRK  
DGHNRWRKKKDGKTVKEAHEKLGKGSVDVLHCYYAHGEENENFQRRSYWMLPDMMHIVFVHYLEV  
KGNKNIVVNTGDEIPSDSQKVTSSSSSLPTHSSVPSLSTDSVSPTTSLMSLREDA SEDIHQASSGLRPL  
YESQHSNGNPLTEKIGAGSNSSYLHPFSGDYEQSSISGTDYIPVVHGDKFRGNDTAYIDGQKTHDVAT  
WSTVLQSTAKLHNDPSLASSPSIPSSMGDVLEQEHTIFSDLLMSKSGLTEVAESSQSLQSNWQIPFEDNS  
GGMPMLTQTQTFGLQFRSDYGTLLGNETR NACSESAAILYSFN GEPKEQPMQQNYLQELEDGQSQH  
ALKSNSANKVPDEETINYGLTVKRTLLDKDES LKKVDSFSRWITKELGEVADLNMQSSPGISWSTDECQ  
HVIDDTSLSPLSQDQLFSINDFSPKWAYAESEIEVLIIGSFLKSQPEVTTCNWSCMFGVEVEIPAKVLADGI  
LCCQAPRHKVGRVPFYVTC SNRLACSEVREFDFREGFARNVDFADFYNSSEILLHLRLEDFLSLKPVDP  
NHSFEGDMEKRNLIQQLISLREVEEYSIKDEVTTTELDISQHMVKEHLFHKQFKEKLYSWLLHKVTESGKG  
PNVLEDEDGQGVHLHLAAFLGYDWAINPIISAGVNI NFRDVNGWTALHWAASCGRERTVAVLVSMGAD  
CGALTDPSPPSPAGRTAADLASSYGHKGISGFLAESSLTHHLETMTDDQKGGRQEISGMKAVQTVSER  
SATPVHFGDMPDCLKDSLTA VRNATQAADRIHQVYRMQSFQRKQLTQYESDELGLSDQQALSLLASR  
ACKSGQGDLANAAA VQIQKFRGWKKRQEFLMIRQ RVAHVGRGHQVRKQYKPIIWSVGILEKIILRW  
RRKGSGLRGFRPNVINEVPDQQNNSL KEDDYDYLKEGRKQKEEKIQKALS RVKSMAQYPEARAQYRRL  
LNVVEDFRQTKASNEGLINSEETVDGMEDLIDIDMLLDDDNFIPIAFD

>GmCAMTA7

MAETTKYIPNSQLELEEEILNEAEHRWLRPAEICEILRNHKKFKLTPDPPVMPPAGSLFLFDRKALRYFRK  
DGHRWRKKKDGKTVREAHEKLGKGSVDVLHCYYAHGEDNEYFQRRSYWMLDEQLEHIVLVHYREIK  
EGCKSGISHLPVVPVTLVGSSQNTSVLSSTKINSPI SLVQTSFTSSANKVYQNGRASEHEDVNSKNGPQAS  
SHAQPISNYVLHSAPWLTHEAAGFSELLRNPLISSW PSSFPSYSPGTGLSPWTSIQNSSRNTINMHDGKH  
HVEASEADLTVRKL SNAGLDSVHRMQDGVIFRDLITDMCVQPVIDLPTVNQVKNEHGLDSFHAQVH  
DHNDHPVVA TTKILVEQKLQDGGLYNDESEQVEY GEMKKLDSFGRWMDKEIGGDCDNSLMASDSGN  
YWSTLDAHSEDKEVSSLRHMQLDVDSLGPSLSQEQLFSIHD FSPDWAYTGVRTKVLIVGTFLGSKKPSSE  
TKWGC MFGEIEVSAEVLADNVIRCQTP LHSPGRVPFYITCSNRLACSEVREFEFDENPTKFLGPEGIKISP  
EEEVRLQMRLKLKLDLGP DNKWLKCSVSECEKCKLGTMYSVR DDSGVFEETFQIDGIGHINHRDILFQ  
RLVRDKLYEWLIYKVHEGGKGPVLDDEGQGV IHLAAALGYVWAMAPLVAAGISPNFRDSRGR TGL  
HWASYFGREETVIVLVQLGATPGAVEDPTSAFPRGQTAADL GSSRGHKGIAGYLAEADLTNQLSVLTV  
KENETGNIATTIAANSALQSVEDDSSMTMDEQH YLKESLAVFQKSAHAAASILA AFRARSFCQRQLA  
QSSSDISEVL DVVADSLSKVQNKGFEDYLHFAAL KIQKRYRGWKGRKDFL KIRDRIVKIQAHIRGHQV  
RKQYKKVVWSVSIVEKAILRWR RRGAGLRGFRVGPVGVVVKDAEKSDEYEFLSIGRRQKSDDVKKAL  
DRVKSMVRNPEAR DQYMRLIMKYEKFKIDDGSSQS QHVG

>GmCAMTA8

MMSHNLTGQLVSAEIHGFHTLEDLDVSN TMEEAKSRWLRPNEIHAILCNHKYFKINVKPVNLPKSGTI  
VLFDRKMLRNFRKDGHNWKKKTDGKTVKEAHEHLKVGNEERIHVYYAHGQDNPTFVRRCYWLLDK  
NLEHIVLVHYRDTQELQLQGSPATPVNSNSSS ASDPAASWIPSEDLD SGVNSAYAVELNDNLTAKSHE  
QRLHEINTLEWDDL VVPNVNTSTTSNGGNVPYSFQENQ SLLSGRFGNVSSNPSAEIPSGNLTQPVSGS  
NSAPYSFPDSAILLKNSPISSGGVDTLGTLV NEGLQSQDSFGTWMNIISDTPCSIDESALKASISSVHV PYSS  
LVADNLQSSLPEQVFNLT EVSPTWASSTEKTKVLVTGYFHNNYENLAKSNLLCVC GDVSVPEIVQVG  
VYRCCVPPHSPGLVNL YLSFDGHKPIQVVNF EYRTPILHEPTASMEEKYNWNEFRLQ MRLAHL LFASD  
TSLNIFSSKVSPNALKEARRFSFKTSYISKSWQYLMKSIDDNTIPFSKVKDSL FETALKNKLKEWLLERIILG  
RKSTEYDAQGQGV IHLCAMLGYSWAISLFSWSGLSLDFRDKFGWTALHWAASYGMEK MVATLLSCG

ARPNLVTDPTPQYPGGCTAADLAYMKGCDGLAAFLSEKSLVEQFNEMSLAGNISGSLETSSTDPVNAE  
NLTEDQLYVKETLAAYRISAEAAARIQA AFREHSFKLRYKAVEIISPEEEARQIVAAMRIQHAFRNYESK  
KKMTAAARIQHRFRTWKYRREFLNMRHQAIKIQAAFRGFQARKQYRKIIWSVGVLEKVLRWRLKRKG  
FRGLQVNPAREETQESDSIAEEDFFRTGRKQAEERIERSVIRVQAMFRSKKAQEEYRRMKLTHNQAKLE  
LELEEFLDSEVDMLPKT

>GmCAMTA9

MMMSHNLTGQLVGAEIHGFHTLDDLDVSNMEEAKSRWLRPNEIHAILCNHKYFKINAKPVNLPKSG  
TIVLFDKMLRNFRKDGHNWKKKTDGKTVKEAHEHLKVGNEERIHVYYAHGQDKPTFVRRCYWLLD  
KSLEHIVLVHYRDTQELQLQGSPATPVNSNSSSVSDSAASWIPSDDLDSGVNSAYAVELNDSLTAKSHE  
QRLHEINTLEWDDLVSANANTSTTSNGGNVPYSFQQNQSLNNGSFGNVSSDPSAEIPSGNLTQLVSGS  
DSAPYSFPESADLLKSSPLSSGGVDTLGTLVNEGLQSQDSFGTWMNIMSDTPCSIDESALEATTSSVHVPY  
SSLVADNKQSSLPEQVFNLTVEVSPVWASSTEKTKVLVTGYFHNNYQHLAKSNLLCVCGDVSVPVEIVQ  
VGVYRCWVSPHSPGLVTLYLSFDGHKPIQVNFYRTPILHEPTALIEEKYNWDEFRLQMLLAHLLFAS  
DKSLNIFSSKVSTNALKEARRFSFKTSYISKSWQHLMKSIDDKTIPFSQVKDALFETSLKNKLKEWLLERII  
LGSKSTEYDAQGQAAIHLCAMLGYNW AISLFTWSGLSLDFRDKFGWTALHWAAYYGIEKMVA TLLSC  
GARNLVTDPTPQYPGGCTAADLAYVKGCDGLAAYLSEKSLVEQFNEMSLAGNISGSLETSSTDPVNA  
ANLTEDQLYLKETLEAYRTAAEAAARIQA AFREHSFKLRYQAVEIMSPEEEARQIVAAMRIQHAFRNYE  
SKKKMAAAARIQLRFRTWKYRREFLNMRQAIKIQAAFRGFQARKQYRKIVWSVGVLEKVLRWLLKR  
KGFRGLQVNPAAEETQESDTIAEEDFFRTSRKQAEERVERSIVRQAMFRSKKAQEEYRRMKLTHNQA  
MLDELEEFLNSEDDMLPKT

>GmCAMTA10

MTPGYEYDINDLHQEAQARWLKPAEVMYILQNHEKFQFTQEPPQQPTSGSLFLFNKRVLRRFRKDGH  
NWRKKRDGRTVGEAHERLKVGNVEALNCYYAHGEQNPTFQRRSYWMLDPAYDHIVLVHYRNTSEG  
KLSSGAGAQLSPSSSVYTQSPSPYSTQNPGSTSILGDSYEPNQSFSSPGSTEVTSDMFVLNNKMGMHMDG  
TDTESGTSPELEV TQALRRLEVQLSL NEDNFEDIVSFGSKHETTHDSNPQHDQRVISNQEQA AFSGPDD  
QGLFYDGYNGRQGDGGEFYHELIDHGYPDGNKALWTEVLESCKSSSAVKLPQKNVYMPVENLENSV  
SSARRVPVSNQENSHWLNFNNSNSENSVFSQPQGVDEVKFPVYSSMVETQVINSDYETLFDQSQIGAP  
PDANSSLTVAQKQKFTIKTISPEWGYATETTKVIVVGSLLCHPSDSAWACMFGDVEVPVEI IQDGVISCE  
APSHLPKQVTLCTITSGNRESCSEVREFEYRDKTNSCTQCTQSETEATRSP EELLLLVRLEQM LLSASTIKN  
DNIESGIPLIKQKADDDSWSHIIEALLVSGSTSTGTVDWLL EELLKDKLQQLWLSRCSQEKDEETGCSLSK  
KEQGIHVMVAGLGF EWALNPILT CGVNINFRDINGWTALHWAARFGREKMVASLIASGASAGAVTDP  
NAQDPTGKTAASIAAGNGHKGLAGYLSEIAVTSHLSSLTLEESELSKSSAELQADMTVNSVSKENLTAS  
EDQASLKD TLA AIRNVTQAAARIQSAFRSHSFRKRRAREVAASAGGIGTISEISAMSKLAFRNSREYN SA  
ASAALSIQKKYRGWKGRKDFLALRKKVVKIQAHV RGYQVRKH YKVIWAVGILDKVVLRWRRKGAGL  
RGFRQEMDINENENEDEDILKVFRKQKVDVEIEEA VSRVLSMVDS PDAREQYHRMLEKYRQAKAELA  
GTSDEASLSTSVGDDLFIDDFYPPF

>GmCAMTA11

MAGLEYSIDDLFQEAKRRWLKPVEALYILRNHDQCKFTHQPPHQ P AGGSLFLFNRRIMRSFRKDGHN  
WRKKKDGKTVGEAHERLKVGNVEILNCYYAHGEENRTFQRRSYWMLPEYDHIVLVHYRETSEGKSN  
SEHVTQLPSEVTFEAQALRQLEEQLSLNDDGFNEIALDLVSGQDQRVYKQDKSAALSGPNDLGQPCD  
GYNGRQDDSGTYHDFLDDCPGGNEKTIYWTKVLESCKPLSVTKLPDQHAYEAIGNENTL FSSGRGVI

ANLENNQWLNSNSNNIENYGGVKFPPYSLAETPGANSDYETFFDQFQNNQGGLGVDSSLTVVQKQKF  
TIRAVSPEYCYSTETTKVIIIGSFLCHDSSTWACMFGDVEVPAEIIQDGIICCEAPSNHLGKVNLCITSGN  
RVPCSEMREFEFRNKTTSTRCNLSLETGSKSPEDLLLVRFAEMLLSSSTTKDDRIESGSHLSTEQKDDD  
DSWSHIIDTLDDSTRTPSDAVKWLLEELLKDKLQLWLSNRRDEGTGCSLSKKEQGIHBMVSGLGFEWAL  
NPILSCGVNINFRDINGWTALHWAARFGREKMOVASLIASGASAGAVTDPSSQDPTGKTAASIAASHDH  
KGLAGYLSEVDLTSHLSSLTLEESELSRESSELEAELTVSSVSEENLVASEDQVSLKASLDAVRNAAQAAA  
RIQAAFRAHSFRKRKERDAAATVLDGYCIDAGSIDNNISVLSAMSKLSSQSWRDYKAALSIQKKYRNW  
KGRIEFLALRQKIVKIQACVIRGYQVRKQYKLLWAVGILDKVVLRWRRKRIGIQSVRQEMESNEEESDD  
ADFLNVFRKEKVNAAIEKALKRVLSMVHSTGARQQYRRLLSLYRQAKIEHGSTSDEAPLSTSEENASNM  
EDDDLCQFLDTFFWPS

>GmCAMTA12

MANNLAAQQLVGSEIHGFHTLQDLVDVGSIMEEARTRWLRPNEIHAMLCNYKYFTINVKPVNLPKSGTI  
VLFDRKMLRNFRKDGHNWKKKDKGKTVKEAHEHLKVGNEERIHVYYAHGQDNPNFVRRRCYWLLD  
KSMEHIVLVHYREIQEMQGSPTVNVSHSSVSDPPAPWILSEEIDSGTTTAYAGDTSANINVKSHLRL  
HEINTLDWDDLVDANDHNTTTPVNGGTVPYFDLQDQILLNDSFSNVANNLSADIPSGSLTQPIAGSN  
SVPYNFSSVNLQTMDDQANPHEQRNNTVSLSGVDSLDTLVNDRLQSQNSFGMWVNPIMSDSPCSVDD  
PALESPVSSVHEPYSSLIVDSQQSSLPGQVFTITDVSPTCVSSTESKSKVLVTGFFHKDYMHLKSNLLCVC  
DVSVP AEIVQVGVYRCWVSPHSPGFVNLYMSIDGHKPIQVNVFEYRTPALHDP AVSMEESDNWDEFQ  
LQMRLAYLLFKQLNLDVISTKVSPNRLKEARQFALKTSFISNSWQYLIKSTEDNQIPFSQAKDALFGIALK  
SRLKEWLLERIVLGCKTTEYDAHGQSVIHLCAILGYTWAVSLFWSGLSLDFRDRSGWTALHWAAYCG  
REKMOVATLLSAGAKPNLVTDPQNPNGGCTAADLAYMRGHDGLAAYLSEKSLVQHFNDSMLAGNIS  
GSLETSTTDPVISANLTEDQQNLKDTLAAAYRTAAEAASRIHA AFREHSLKLRTKAVASSHPEAQARKIV  
AAMKIQHAFRNHKTCKVMAAAARIQCTYRTWKIRKEFLNMRCQAVKIQA AFRCFQVRKHCKILWS  
VGVVEKAVLRWRLKRRGFRGLQVKTVEAGTGDQDQQSDVEEEFFRAGRKQAEERVERSVVRVQAMF  
RSKKAQEEYRRMKLALDQAKLEREFERLLSTEVDMLKT

>GmCAMTA13

MANNLAVQLVGSEMHGFHTLQDLVDVGSIMEEARTRWLRPNEIHAMLCNYKYFTINVKPVNLPKSGTI  
VLFDRKMLRNFRKDGHNWKKKDKGKTVKEAHEHLKVGNEERIHVYYAHGQDNPNFVRRRCYWLLD  
KSMEHIVLVHYRETQEMQGSPTVNVSHSSVSDPPAPWILSEEIDSGTTTAYTGDMNSNNINVKSHLRL  
HEINTLEWDDLVDTNDHNASTVNGGTVPYFDQDQILLNDSFGNVANNLSAEIPSGNLTQPIAGSN  
RVPYNFSESVTLQTMNDQANPHEQKNNTVSLSGVDSLDTLVNDRLQSQDSFGMWVNHIMSDSPCSVD  
DPALESPVSSIHEPYSSLVDSQESSLPEQVFTITDVSPTCVSSTESKSKVLVTGFFLKDYMHLKSNLLCVC  
GDVSVP AEIVQVGVYRCWVSPHSPGFVNLYLSIDGHKPIQVNVFEYRTPALHDP AVSMEESDNWDEF  
RQQMRLAYLLFAKQLNLDVISSKVSPNRLKEARQFALKTSFISNSWQYLIKSTEDNQIPFSQAKDALFGIT  
LKNRLKEWLLERIVLGCKTTEYDAHGQSVIHLCAILGYNWAVSLFWSGLSLDFRDRFGWTALHWAA  
YCGREKMOVATLLSAGAKPNLVTDPQNPNGGCTAADLAYMRGHDGLAAYLSEKSLVQHFNDSMLAG  
NISGSLETSTTDPVNPANLTEDQQNLKDTLTAAYRTAAEAASRIHA AFREHSLKLRTKAVASSNPEAQAR  
KIVAAMKIQHAFRNHETCKMMAAAARIQCTYRTWKIRKEFLNMRRQAVKIQA AFRCFQVRKHCKIL  
WSVGVVEKAVLRWRLKRRGFRGLQVKTVDAGTGDQDQQSDVEEEFFRTGRKQAEERVERSVVRVQA  
MFRSKKAQEEYRRMKLALNQA KLEREYEQLLSTEVDML

>GmCAMTA14

MAGLEYSIDDLFQEAKRRWLKPVEALYILRNHDQCKFTHQPPHQPAGGSLFLFNRRIMRSFRKDGHN  
WRKKKDGKTVGEAHERLKVGNVEILNCYAHGEENRTFQRRSYWMLPEYDHIVLVHYRETSEGKSN  
SEHVTQLPSEVTFEAQALRQLEEQLSLNDGDFNEIALDLVSGDQQRVVYKQDKSAALSGPNDLGQPCD  
GYNGRQDDSGTYHDFLDDCPGGNEKTIYWTKVLESCPLSVTKLPDQHAYEAIGNENTLFSSGRGVI  
ANLENNQWLNSNSNNIENYGGVKFPPYSLAETPGANSDYETFFDQFQNOGQLGVDSSLTVVQKQKF  
TIRAVSPEYCYSTETTKVIIIIGSFLCHDSSTWACMFGDVEVPAEIIQDGIICCEAPSNHLGKVNLCITSGN  
RVPCSEMREFEFRNKTTSTRCNSLETGSKSPEDLLLLVRF AEMLLSSSTTKDDRIESGSHLSTEQKDDD  
DSWSHIIDTLLDSTRTPSDAVKWLL EELLKDKLQLWLSNRRDEGTGCSLSKKEQGIIH MV SGLGFEWAL  
NPILSCGVNINFRDINGWTALHWAARFGREKMOVASLIASGASAGAVTDPSSQDPTGKTAASIAASHDH  
KGLAGYLSEVDLTSHLSSLTLEESELSRESSELEAELTVSSVSEENLVASEDQVSLKASLDAVRNAAQAAA  
RIQAAFRAHSFRKRKERDAAATVLDGYCIDAGSIDNNISVLSAMSKLSSQSWRDYKAALSIQKKYRNW  
KGRIEFLALRQKIVKIQACVRGYQVRKQYKILWAVGILDKVVLRRRKRIGIQSVRQEMESNEEESDD  
ADFLNVFRKEKVNAAIEKALKRVLSMVHSTGARQQYRRLLSLYRQAKIEHGSTSDEAPLSTSEENASNM  
EDDDLCCQFLDTFFWPS

>GmCAMTA15

MTPGYEYDINDLHQEAQARWLKPAEVMYILQNHEKFQFTQEVPPQPTSGSLFLFNKRILRYFRRDGHN  
WHKKS GGRTVGEAHERLKV LNVEALNCYARGEQNPAFQRRSYWMLDPA YEHIVLVHYRNTSEGKL  
SSGAGAQLSPSSSVYTQSPSPYSTQNPGSTSILGDSYEPNQSFSSPGSTKVTSEIFVLNNKMGHMDWADTE  
SGTSSELEVTQALRRLEVQLSLNEDNFEDIVSFGSKHETVHDSNPKHDQRVISNQEQA AFSRPDDQGLF  
YDGCNGRQDHGYPDANEKALWTEQLESHKSSSAVKLPQKNVYMPAENENSVSSARRVPVSNQENSH  
WLNFNCCNNSSENSVFSQPQGVDEVKFPAYSSMLETQVINSY YETLFDQSQIGAPPDANSSLTVAQKQK  
FTIKTISPEWGYATETTKVIVVGSFLCHPSDSAWACMFGDVEVPIEIIQDGVISCEAPSHLPKGVTL CITSG  
NWESCSEVREFEYHDKTNSCTRCTQSETEATRSPEELLLL VRLGQMLLSASTIKNDNIESGIPLIKPKADD  
DSWSHIIDALLVSGTSSGTVDWLL EELLKDKFQQWLSFRSREKDEETGCSLSKKEQGIIH MVAGLGFE  
WALNPILTCGVNINFRDINGWTALHWAARFGREKMOVASLIASGASAGAVTDPNAQDPTGKTAASIAA  
SSGHKGLAGYLSEIAVTSHLSSLTLEESESSKSSAYLQADRTVNSVSKENLTANEDQASLKDTLAAIRNVT  
QAAARIQSAFRSHSFRKRRAREATASTGGIGTISEISAMSKLAFRNSHEYN SAALSIQKKYRGWKGRDF  
LALRQKVVKIQAHVRYQVRKHYKVIWAVGILDKVVLRRRKGAGLRGFRQEMDINENEDEDILKVF  
RKQKLDVEIEEA VSRVLSMVDS PDAREQYHRMLEKYRQAKAELAGTSDEASLSTSVGDDL FMDDFYFP  
P

>SICAMTA1

MADSRRYGLNAQLDIEQILLEAQHRWLRPAEICEILKNYQKFRIAPEPPNRPPSGSLFLFDRKVLRYFRK  
DGHSWRKKRDGKTVKEAHERLKAGSIDVLHCYAHGEENENFQRRSYWML EEEEMSHIVLVHYREVK  
GNRTNFSRIREPQQVTPDLQETDEDVHSSEVDSSASAKFYPNDYQVNSQVTD TTSFSSAQASEYEDAESV  
YNQHPTSGFHSFLDAQPSAGDGLAVPYHIPFNSNDQVQFAGSSGTSFSSIPPNGNGNTSTANTYVPSRNL D  
FASWGTISVNNPAAAYQSLHFQPSGQSSANNMMHEQGNTTMGQICSNDFTRQE HENHIDGLGNWQTS  
EVDSSFISKWSMDQKLNPDLTSGQTIGSSGVYGV EHHNSLEASQLLPAQQDKHPIQNELQSQLSDANIG  
GSLNADLDHNL SLGVT DYSALKQPLLDGVLKREGLK KLD SFDRWVSKELGDVSESHMQSNSSSYWD  
NVGDEDGVGNSTIASQVQLD TYVLSPLAQDQIFSIIDFSPNWA FSGSEIKVLITGRFLKSQQEVENCSWA  
CMFGELEVPAEVIADGVL RCHTPVQKAGRVPFYITCSNRLACSEVREFEF RVTEGQDVVANPNSSCSSES  
LLHMRFGKLLSLESFVSQTSPPISEDNVSYISSKINSLLRDDDNEW EEMLHLTNENNFM AEKVKDQLLQ  
KLLKEKLHVWLLQKVAEGGKGNILDEGGQGV LHFAAALGYDWA VPPTIAAGVSVNFRDVNGWTA

LHWAASYGRERTVGFLLISLGAATGALTDPTPKHPSGRTPADLASSNGHKGIAGYLAESSLSSHLSLELK  
EKKQGENEQAFGEAVQTVSERTATPAWDGDWSHGVSCLKDSLAAVRNATQAAARIHQVFRVQSFQRK  
QLKEYGGSEFGLSDERALPLLAMKTNRAGQHDEPHAAAARIQNKFRSWKGRDRFLLIRQRIKIQAHV  
RGHQVRNKYKNIWVSVGILEKVILRWRRKGSGLRGFKPEAPTEGSNMQDQPVEDDYDFLKEGRKQTE  
ERLQKALERVKSMVQYPEARDQYRRLN NVSDMQEPNSTAASYN SAEAVDFNDDLIDLGLDDDDTF  
MPTAP

>SICAMTA2

MDITQILSEVQHRWLRPAEICEILRNHRKFHLTPEAPFRPVSGSVFLFDRKVLRYFRKDGHNWRKKKDG  
KTVKEAHEKLVGSDVHLHCYAAHGEEDDNFQRRSYWMLQDLMHIVFVHYLEVKGNKVNVSIRST  
KSVHPNYPNDCSLSDSFSTRHKKLT SANADSTSLASTL TEAHEEAESEDSHQACSRFHSYPDRASGMS  
HLVENGD TISSYQSSVEYTP LPGIDGSGKCDLGNFASGPQRTIDLG SWEPLPQHCLNGEMVCQDD  
FKNNLSVHGNWQYSFGQSP LQFHGQNVNQDLIADSSYDLGLPSDLLTVRGP SYLSNEKEEQLAQLNL  
QFLKSLVEVQGDINQENSMDMLELGDYSTIKOPHLSSVKVEEGLKKVDSFSRWV AKELEDVEELHMOP  
SNQMSWNVIDTEEEG SCLPSQLHVSDSLNLSLQEQVFSIIDFSPNWAYSNLETKVLITGRFLKSEGELV  
EYKWSCMFGEVEVPAEVLADGVL RCHAPPHKPGVLPFYVTC SNRLACSEVGGFEYRFGPYQEVGAAD  
VSMTEKHLLERIENLLSLGPVSSCRSSDSMEDSEEKRSTVNKIIPMMEENQPIIERASYGDT SQCGVKED  
LYFERK LKQNFYAWLVHQVTDDGRGRTLLDGEQGQVHLVAALGYD WAFKPILASGVSVDFRDMNG  
WTALHWA AFYGREKTVVSLVSLGASPGALTDPSAEFPLGRTPADLASANGHKGISGFVAESSLTTHLSK  
LTVTDAKEELDSEVCEAKVGETVTERVA VSTTENDVPDVLSLKDSLAAIRNATQAAARIHQIFRVQSFQ  
RKQIIEHCDNELSSDENAIIVASRACKLGQNNGIAHAAAIQIQKKFRGWNKRKEFLIRQKIVKIQAHI  
RGHQVRKKYEP IWSVGILEKVILRWRRKRSGLRGFRSEAVMSK PSTQEDSLPEDDYDFLKEGRKQTEVR  
MQKALARVKSMTQYPEGRAQYRRLTAAEGLREV KQDGP IQIPEIPEDTIYPEEELFDVDSLDDDDTFMS  
IAFE

>SICAMTA3

MAESGYNTNDLVQEGRFRWLRPAEVLFILQNHDDRQLAHQPPQKPASGSMFLFNKRVLRYFRKDGHS  
WRKKKDGRTVGEAHERLKVGN AEALNCYAAHGEKNSNFQRRSYWILDPAYEHIVLVHYRDITEDES  
PGYGEICSDAVIHSNGMNVSDITRMMEGVSNSPKVEISQALRRLEEQLNLNDDSSSDIYSLYSEIENSND  
AENVVHDKSSLVQIQDNSN NFLFLPHSGESSESRDQLLNLDNSMWKEMLDHCRSSPASQPQAKCFEKL  
DENGMLQTSSGSEPIEAIKSDRWPIIGGKEALKCSVTNLKQVDDFKYIGCAQINVF GSYPDQCTTIFDQD  
QIGISSETNMSLTIVQKQKFTIHDISP DWGYASDATKVVII GSYL CNPSEYTWTCMFGDTEVPVQI IKDGA  
RCQAPPHLPGKVALCVTTGNRTPCSEVREFEYRAKFDDRQNVVPEVGGASKSSEELLLLVRVQMLLS  
DSSVQIGDGSSELSNDILEKSKASEDSWSQVIESLLFGTSTSTVTIDWLLQELLKNKLQQLWSSKLQVKNE  
MVYLSRKDQGIVHMIAGLGF EWALHPVLNAGV SANFRDIRGWTALHWAARFGREK MVASLIASGA  
FAGAVTDPSSQDPFGKTAASIASSCGHKGVAGYLSEVALTSHLTSLTLEECDVSKGTADIEAEQTISNITT  
TSPVTHEDQLSLKDTLDAVRNAAQAAARIQSAFRAHSFRKRRLREAAHVATT CRDEYCILSNDVLGLS  
AASKLAFRNVRDYN SAALSIRKYRGWKGRKDFL VFRQKVVKIRAHVRGYQVRKEYKVCWAVGILEK  
VVLRWRRRGVGLRGFRLEDEPIEES ENEDILKLFKQKQVDA AINEAVSRVLSMVDSPEARQQYRRILEKY  
RQAKVSQSSI

>SICAMTA4

MAESGYDINDLVREAQIRWLKPAEVLFILRNHENHQLSSEPSQKPPSGSLFLYNKRVLRFRRKDGHSWR  
KKKDGRTVGEAHERLKVGN AEALNCYAAHGEQNP SFQRRSYWMLDPAYDHIVLVHYRDIIEGRQNP

AFMSESSPISSAFSPSPSSYSTPHTGSTGIASECYEQYQONQSSPGEICSDAIINNNGTDDTIGRTEEVISSPGL  
MCQALRRLEEQLSLNDDSLKEIDPLYGDAINDDSSLIQMQGNRLLLQHHSGESSESHHRDLTQDAH  
VWKDMLDHYGVSAAAESQTKYLHKLDENAMLQTLSEERRAIEAYESYKWRDFSDKETQTAPVQAFKQ  
LEDFKYPTYPDITTFGSNPDEYTTIFDQDQIGTSLEDEMSTIAQKQKFTIRHISPDWGYSSSEPTKVIIGSF  
LCNPSECTWTCMFGDIEVPIQIIQEGVICCQAPRHLPGKVTLCVTSGNRESCSEVREFEYRVKPDDCARN  
NQPDVEGAYRSTDELLLLVRFVQLLLSDLSVQKRESSELGNDLLEKSKASEDSWSQIIESLLFGTSVPMVT  
IDWLLQELLKDKFQQWLCSKLOKQDNQIDCSLSKKEQGIHMVAGLGFEWALHPILNAGVSANFRDIN  
GWTALHWAARFGREKMVASLIASGASAGAVTDPSSRDPVGKTAASIASCCGHKGLAGYLSEVALTSH  
LSSLTLEESELSKGTADVEAERTISSISNTSATINEDQORSLKDTLAAVRNAAQAAARIQSAFRAHSFRKRQ  
QREFGVSATTSVDEYGLSNDIQGLSAASKLAFRNPREYNSAALAIQKKYRGWKGRKDFLAFRQKVVKI  
QAHVRGYQVRKQYKVCWAVGILEKVVLRRRRGVGLRGRFRHDPESIDEIEDEDILKVFRKQKVDAAL  
DEAVSRVLSMVESPGARQQYHRILEKYRQSKAELEGADSETASTAHGHV

>SICAMTA5

MESNRAGQLTGKEIHGFRTLQDLIPSILEEAKMRWLRPNEIHAILCNYKYFNIFVKPVNLPTSGTIVLFD  
RKMLRNFRKDGHNWKKKKDGKTVKEAHEHLKVGNDERIHVYYAHGEDLPTFVRRCYRLLDKSLEHI  
VLVHYRETQETRGAPESTVAKSSPATPVNSSSSSDPSPSGWILSEECNSVDEQAYGASQHANLEPNRD  
MTAKTHEQRLLEINTLDWDELLAPNDPNKLMATQEVGGRASVGQQSQCEVNGYSLNDGSSSMARAPI  
ASLESFVGQVAGSDAVNFNPLNDMSFRSGDQMTSNFQKKESGVMTVGAGDSFDSLNDGLQTQDSF  
GRWINYFISDSSGSADELMTPESSVTIDQSYVMQQTFFNITEIFPSWALSTEETKILVVGHFPGRQSP  
LAKSNLFCVCADVCFATAEFVQSGVYRCVISPQAPGLVNLYSLDGNTPIQVMTEFRAPSAHKWTDPLEDQSN  
WDEFVRVQMLLAHLLFSTSKLSIFSSKVHQNLSNDAKKFVRKCAITNNWAYLIKSIEGRKVPMSHAKD  
CLFELSLOTKFHEWLLERVIEGCKTSEERDEQGGQVIHLCAILGYTWAIPFTWSGLSVDYRDKHGWTAL  
HWAHYGREKMVATLLSAGANPNLVTDPNSENPDGYTADLASKNGFDGLGAYLAEKALVAHFEA  
MTLAGNVSGSLQTTTEPINPENFTEEELYLKDTLAA YRTAADA AARIQAAFREQSFKLQTKAVESVNQE  
TEARNIIAAMKIQHAFRNYESRKKLAAAARIQYRFRTWKMRKDFLAMRRHAIKIQAVFRGYKERRKQYR  
KIVWSVGVLEKAVLRWRLKRKGRGLQVQSSSEVDIKPDGEVEDFFRASRKQAEERVERSVVRVQAMF  
RSKRAQEEYSRMKMAHNNALLEYKRLINPDN

>SICAMTA6

MESSVSGRLLGCEIHGFRMQLDIPNIMEESKMRWLRPNEIHAILCNHKYFNINVKPVNLPKSGTIVLF  
DRKMLRNFRRDGYNWKKKKDGKTVKEAHEHLKVGNDERIHVYYAHGEDNTTFVRRCYWLLDKTLE  
HVVLVHYRETQEVSSNSTVAQGSPAAPVSSGSALSDPADLSASWVLSGELDSA VDDQYSASRHAHLEP  
NRDMTVQNHEQRLLEINTLEWDDLLAPGDPNKMVATQQAVGKTAYVQHTSYEQRNLCENGYSGD  
GGVSSSLERISTFNNSNEITFQTVDGQMTSSFEKNESGVMTVSTGDSLDSLNDQLDRLQTQDSFGRWMNYL  
IKDSPESIDDPTPESSVSTGQSYAREQIFNITEILPAWAPSTEETKICVIGQFHGEQSHLESSLRVCVGDAC  
FPAEVLQPGVYRCIVSPQTPGLVNIYLSFDGNKPIQVMSFEFRAPSVHVWTEPPENKSDWDEFNRQMR  
LAHLLFSTSKSLNILSSKIHQDLLKDAKKFAGKCSHIIDDWACLKSIDKKVSPHAKDCLFELSCLKTRL  
QEWLLERVVEGCKISEHDEQGGQVIHLCAILGYTWA VYPPFSWSGLSLDYRDKYGTALHWAAYYGRE  
KMVATLLSAGAKPNLVTDPTSEN LGGCTASDLASKNGHEGLGAYLAEKALVAQFKDMTLAGNISGSL  
QTTTESINPGNFTEEELNLKDSLTA YRTAADA AARIQAAFREERALKVVRTKAVESSNPEMEARNIIAAMKI  
QHAFRNYEMQKQLAAAARIQYRFRTWKMRKEFLHMRRQAIIKIQAVFRGFQVRRQYRKIIWSVGVLEK  
ALFRWRLKRKGLRGLKLQSTQVTKPDDVEEDFFQASRKQAEERIERSVVRVQAMFRSKQAQEQYRRM  
KLEHDKATLEYEGTLNPDTEMD



>SICAMTA7

MAVDLEQILKELHHRWLLPHEVCQILRNHQSFCLTQQQLKPPAGSIFLYDRKLLPNFCKDGHHRK  
NKDQGTIKEAHEKFKAGSVDVLHCYYVHGEGNKNFQRRSYWMLLEEQLHIVLVHYRDVKEGYRLGA  
SRLQPVHPGLLLENPDSSSKPCFVFGPAFQKSHTSNPSLVDLKEQALSELHSGDSKGLVAFSRKERFQL  
NPQVRAFMSGFRKFERNLNVMLQRKFYSGHYNLADLRSSKLYAKLYAGKAVANNRSLAITSQKVF  
EENIHVAPPQIQNISSQTVVTPDAAVKTSSLDGGLNSDEVGSLKLDILGKWMDFAGGNKSLMSSD  
SGNYWNTLDTDNGDKEVSTLSRHLLLEANSVGTSPSQKQLFRIFDFSPQWAFSGVETKVLIVGTFLVHR  
KYLTCLKWSCMFGEVEVSAEVQTQSIRCQVPFHAPHGVFPFYVTCGNRLACSEVREFEYREKSELALAL  
RPSDEVHLQVQLVKLLYSGLNKKFLDCSSRECENCKLKTQLCSLKCQGTGNATERLEDLLAVIECDHINF  
KDVIQIQNFMKDKLYEWLVSRAHEEDKGPNILNDQGGKVIHLVAALGYEWGLPLIAAGISPNFRDAC  
GRTALHWAHAHYGREDMVIALLIKLGVAAAGAVDDPTTASPGGRTAADLASSRGYKGIAGYLAESDLTSH  
HQLLATSKNALDTIGAGLEAEKVYESAVQEIVPLNGTIDDDVSLKASLASLRKSAHAAALIQAAFRARS  
FRQRQLRESRNDVSEASLDLVALGSLNKVQKVNCFEDYLHSAAINIQKQYCGWKGRREFLKVHNQIVK  
MQALVRGHEVRKQYKQFVWAVSILEKGILRWRKKTGLRGFWPEKTSETGIVEREREKEEYDYSIGLKQ  
KCAGVEKALGRVESMVRHPEARDQYMRMVAKFKSCKLDDGGREVNRSPPV

>ZmCAMTA1

MQQQQQGLDIGKLQEVVKTRWLKPQEVKILQNHFLTISHKPPQKQSGSWFLFNRRVLRVFRNDGF  
EWQKKRNGKTINEAHERLKVDNVDALNCYYARGDKNPTFQRRYWMLDAPAYEHIVLVHYRDVLEGS  
SVSARNDSSTLNQNGSASRAEVHSSPGWTSELIAHCTNSCSPGSAEEVSSQISASESDLIQHKAALRKLK  
QLSLEDKEDCDVNAEDVPADNEPIILPVIQNEEPGTSRNHDDIFDVLDFSEDHINGTGTHPCHSAIDVLK  
NSDTWLEDDQLEAILHPACMTLTENQWFRIHEVSPESAFSYESTKVIIVGDFLCNPPHSSWQVLFQDVK  
VCVEIIQQGVIRCHTCLDAGKVRMCLLDGNGKSCSEAREFEFLEKPTKCMIDGNTNPCNEAQDVKLH  
QIPTKSSEELSLLLHYVHTLFDGHASGLFSNFSPLQNLGCGIQSNQMDVMKKAYKQLDPENVVSSVME  
VLLNDKFKQWLSKCEQNIDGDHLLPKQYRNIIHTVAALGYDLALKPLSSGVPINYRDANGWTALH  
WAARFGREDMVVALLTAGAAAGALSHTSEDPAAKTPASIALAYGFKGLSAFLSEAQLTTHLDSIESKE  
NGKLSREEGICRAVDRISDKSSHVHGGTDDQLALKDSLGAVRNAVQAAGRIQAAFRIFSFKKKKEMA  
LGNRNSCCLSISEAGAVSHDMLEKAVLSIQKNFRCWKKRKEFLKMRNNVRIQARVRAHQERNKYKE  
LISSVGILEKVMIRWYHKGVGLRGFNNGAMTIDEEVDEVDVAKVFRKLRVETAIDEAVSRVSCIIGSPKAM  
HQYRRMLNRYQQTKDDQEK

>ZmCAMTA2

MPRSGSLFLFDRKVLRYFRKDGHNWRKKKDGKTVKEAHEKLGKAGSIDVLHCYYAHGEENENFQRRTY  
WLEEDFTHIVLVHYLEVKGCKQSFNRVKEELMQLSNVDSPSCSNITSQNQMGPQNMEAAESPISGQI  
SEYEDTESDNCRASSRYHPLAEMQQLVDGVITENMLYPSASTVGSRQGYHGEMLPITDNLNRSFSNH  
DIARMLDGANIGLSDVSSTLFDVSPFNPFNYSAGFTEPTLHSSFACLEANDLDDSSCLQFTTSEALYTN  
HLNQKEADALGFTGILASEVNRDRYNDGSIKHSLLKQSSDLLTIEAPGLKKNDSFSRWMSKELEELDA  
YVVNPSLSQDQLFSILDVSPSCAYIGTNTKVSVTGTFLVNKKHVESHVWCMFGDVEVPAEVLTDGTLR  
CYAPAHQSGRVPFYVTCNRVACSEVREFEYRDSEAHYMETSRSQANGVNEMHLHIRLEKLLTLGPDD  
HQMLVISSGNEKEYEIMNAINSLMLDGKWSNQESSVKEVVSTARVQSLKLVKEKLHQWLICKVNDG  
KGNVLCKEGQGVHLVAALGYDWAIRPIMIAGVNVNFRDAHGWALHWAASLGRERTVSVLIANG  
AAAGALTDPTSEFPSPADLASVNGHKGIAFLAESALTSHLSALTIRESNSTVEACGLPFAEDLTGI  
DSVHLAGEGPDASLEGLSVAVRKSTQAAARIFQAFRVESFHRKKVVEYGDDTCGLSDECTLSLVSLKN

VKPGQHDTHLHSAAVRIQNKFRGWKGRKEFMIIQRIVKLQAHVRGHQVRKNYRKVVWSVGIVEKVI  
LRWRRKRPLGRFRPEKQLEGPSQIQPAKAEDEYDFLHDGRRQAEARLQRALARVHSMQYPEAREQ  
YHRLTTCVAEMKQSRMMQDEMLSQAAGGADDFMAGLEDLICIDDAPPRCLPFGEAEFFYIR

>ZmCAMTA3

MAEARRHAVAPQLDIEQILKEAQHRWLRPAEICEILKNYRNFHIAPEPPNRPPSGSLFLFDRKVLRYFRK  
DGHSWRKKKDGKTVEKAHERLKSGSVDVLHCYYAHGEGNENFQRRSYWMLEEDFMHIVLVHYLEVK  
GGKSTSRIRGHDDMLQAARTDPSLSQLPSQTTEGGNSLSGQASEYEETESDIYSSGAGYHPFSWTQHHE  
NGGGPVIQTSIPSSYVPALPLGNLQGFATVTNTDIYSRQDALPVTLNPLAIEFNGADNQLDPSSLNG  
LVKPFQMQSTPQSTVPSSELPFTEEHGNESFTFHEVYSNGLSIKDAEIVGTNEESVWKLPGAISSIPSEDSFQ  
QNDRSLEETISYPLLKTRSSNLSEMLKDSFKKSDSFTRWMSKALGEVDSQIKSSSGVYWNSEETNNIETSS  
CDQLDQCTIDPVLAEQQLFSIVDFSPSWTYAGSKTRVLINGKFLNSAELKRCKWSCMFGVEVPAEISAD  
GILRCYSPSHKGRVPPFYVTCTNRLACSEIREFEFRPSVTQYMDAPSPHGATNKTYLQMRDNLNLSLGH  
NEYQATVSNPTKEMVDLSKKISSLMTDNDSDWSQLLKLASDNPEVTDQDEFFEKHLKEKHLHIWLHVH  
KASDGGKGNVLDDEGQVHLHAAALGYDWVIRPAVSAGVNINFRDAHGWALHWAFAFCGRERTV  
VALIALGAAPGALTDPTPIFPTGSTPADLASANGYKGISGFLAESSLTSHLQTLDLKEGKGSNPPEISGLP  
GIGDVTERRASPLAGEGLQAGSMGDSLGAIRNAAQAAARIYQVFRVQSFQRKQAVQYEDDNGAVSSD  
RAISLLSVKPSKPVQLDPLHAAATRIQNKYRGWKGRKEFLIRQIRIVKIQAHVGRGHQVRKHYRKIIWSV  
GIVEKIILWRRKAGLRGFRSTEGATVSSSNLIQNKPEDDYDFLQQGRKQTEERLQKALARVKSMAQ  
YPDARDQYQRILTVVTKIQESKAMQEKMLEESTEMDEGFFMSDFKELWDDDIPMPSWS

>ZmCAMTA4a

MSQSF DINVL REEARSRWLK PSEVYYILQNH ERFPI THEAPKKPPSGSLFLYNRRVNR YFRRDGHTWRRK  
KDGR TVGEAHERLKVGNVDSLSCYAHGEQNPCFQRRCFWML EPAYEHIVLVQYREVAEGRYSSQL  
SNGPPEPLSSLGYPNAICGNQYHRSTSGTSEGSESHQSYSNLSSVTEVSSYSGNKEYNKNDGSLLSIPEVG  
HTCQQNQ TGN GNSKNKSELNMALKKIAEQLSLGEDDDDDYIYSNQTHSMGGDNQIKQIRQEGTQKG  
LSRN IAPSWEDVLHSSSGLPTSSYQQSDVKYQKKSEYQPPEILDSSDLRIQLSATKRFLLGPEASIDSPSLN  
SVLRNRVNSVTD TISAYDSRFESSLNPDWQTKTALTFQNSQGSEITELFDHDFEPYSREDTTISLGQTN  
KFNIREV SPEWAFSYEITKVIITGDFLCDPSNLCWAVMFGDNEVPVEIVQPGVLRCHTPLHSNGNLRICIT  
SGNREVCSEFKDFEFRSKPTSSSFTDIAPSSRHLKSSEELLLLAKFARMLLSGNGNREVPDGPQSGQCPK  
LKTNEELWDRLINE LKVG CENPLSSVDWIVEQLLKS NLQQWLSVKLRGFNGTDFLSKQEQGIIHLISALG  
YEWALSPVLSAGVGLNFRDSNGWTALHWAAYFGREKMVAALLAAGASATAVTDPTAQDPVGKTA  
FLASERGH TGLAGYLSEVSLT SYLASLTIEESDVSKGSAEVEAERA VEGISQRNAQRHGGTEDELSMKDS  
LAAVRNAAQAAARIQNAFRAFSFRKRQOKTARLRDVYGMTQEDIDELAAASRLYHQAHASSGQFYD  
RAAVSIQKKYKGWKGRKHF LNMRRNAVKIQAHVGRGHQVRKKYRTIVSTVSVLEKVILRWRKGHGLR  
GFRAEQQPMVEAIEEDDEEDDDFDDEAVKVFRRQKVDQAVKEAVSRVLSMVDSTEARMQYRRMLE  
EFRQATAELEG SNEVTSIFDSLELLGINNFM

>ZmCAMTA4b

MGFN RILTN GAPIGLFFGGSLFLYNRRVNR YFRRDGHTWRRK KDGR TVGEAHERL KFFVHVFLQTWSK  
HSHRKQGR CRIPWPRVIVPNC GSGSPWVIVPNARELLQHS HDARTCVSVGQVEFHGCFRLS QMNAYY  
GALGAFGQVGNVDALSCYAHGEQNPSFQRRCFWML EPAYEHIVLVQYREVDVVRNYSSQLSNGLPE  
PLSSLGYPNAICGNQYHSSSSGASECSESHQSYSNLSSVTEVSSYSGNKEYTKNDGGLLSIPEVGHTCLQQ  
NRTDNGNSKNKSGLNIALK KIAEQLSLGEDDDDYIFSNQAHSVGGDNQVKHIQQEGTQKGLSRNIAPS

WEDVLQSSSGLPISSYQQSDVEYQKNSEYHPPERLDSSDLRIQLAAAKKFLLGPEATVDSPSLNSVLRNR  
ANCVTDTISAYDSRFGSSLNPDWQTKTALTFQSNSQGSEITELFDHGHFEHYSREDTTFSLGQTNKFNIR  
EISPEWAFSYEITKVIITGDFLCNPSNLGWAVMFGDSEVPAKVVQPGVLLCHTPLHCSGNLRICITSGNR  
EVCSEFKDFEFRSKPSSSFTDIAPSSRHLKSSEELLILAKFARMLLSGNGNPEVPDGDQPQSGQCPKLMDE  
GLWDRLEELKVGCEPLSSVDWILEELLKSKLQKWLSVKLRGFNGTDSISKHDQGIHLISALGYEWALS  
SVLSVGVGLNFRDSNGWTALHWAAYFGSCSFRNRTKVAKVATFLNMRRNAVKIQAHVGRGHQVRKKY  
RTIVSTVSVLEKVILRWRKRGHGLRGFRAEQQSMVEAIEEDDEEDDDFDDEAVKIFRRQKVDQAVKE  
AVSRVLSMVDSTEARMQYRRMLEEFRQATNWKDQMK

>ZmCAMTA5

MAGGAGGRDPLVASEIHGFLTCADLNFDKLMMEAGTRWFRPNEIYAVLANYARFKVHAQPIDKPISG  
TVVLYDRKVVRNFRKDGHNWKKKKDGKTQVEAHEKLIKIGNEEKVHVYYARGEDDPNFFRRCYWLL  
DKELERIVLVHYRQTSEESALPPSHVEAEVAEVPRINMIHYTSSTDSASAHELSSAAAAPEDINSNGG  
AVSSETDNQGSSEFWVDLLESSMKNDTPVDASACGGLSVSNQQTNNMGDMSGNNILYINATSNAIF  
SPPTNVVSEAYANPGLSQVSESYFGSLKDQANHAPSLTSDLDSQSKQHTNSLMKTPVSDNMPNDVPA  
RQNSLGLWKYLDLDDISLDDNPSSGILPTEQVTGEIPFQITEISSEWAYCTEDTKVLVVGCFHENYRHLA  
TNLFCVIGDQCVDANIVQTGVYRFIARPHAPGRVNLTLTLDGKTPISEVLSFHYRMVPDSQNLAEDEPQ  
KSKLQMQMRLARLLFTTNKKKIAPKLLVEGSKVSNLLASTEKEWMDLSKFVTDKGTYPATEGLEL  
VLRNRLQEWLVEKLIIEGHKSTGRDDLQGGPIHLCSCLYGTWAIHLFSLSGFSLDFRDSGWTALHWA  
YCGREKMVAALLSAGANPSLVTDPTHDPGGQTAGDLAAGQGYHGLAAYLSEKGLTAHFEAMSLSK  
GK

RSTSRTESLKRNTKEFENLSEQELCLRESLAAYRNAADAASNIQAALRERTLKLQTKAIQLANPENDAS  
AIVAAMRIQHAYRNYNRKKMMRAAARIQSHFRTWQIRRNFMNMRRQAIKIQAA YRGHQVRRQYRK  
VLWSVGVVEKAILRWRKRRKGLRGIATGMPVAMATDAEA AASTAEEDYYQVGRQQAEDRFNRSVVRV  
QALFRSHRAQQEYRRMKVAHEEAKVEFGRK

>ZmCAMTA6

MDAESPISGQISEYEDAETDNSRASSRYHPFTEMQQPVDGTVMGNFFGASSPSVSVNNLAAGYLGEMQ  
PTGANFTSHFATRNDIASVFNDTGSELGGPKTSIDSVLLGEPFPEYPGGFMESTLYSSVATLGNSLEDGL  
QTFMSEALYTNLNTQKEVDALGAAGITSSKYLKNDVGHWSLPISMSWYDVTLTYFQTENDGYTDQSV  
RYPLLKQSSDLFKMEPDGLKKFDSFSRWMSNELPEVVDLDIKSSDAFWSTTETVNVADGSSIPINEPLD  
VFVVSPLSQDQLFSIIDVSPSWAYNGTKTKVLITGTFLAKKEDVENCSWSCMFGDSEVSAEVLVDGLR  
CYTPVHHSGRVPFYVTCNVRVACSEVREFEFRDSETHYMDISDKHTTGINEMHLRIRLDKLLSLEPEDYE  
KYVLSNGNKSELINTISSMLDNNLSNLALPSDEKELCTVQDQNLKQVKEKLYYWLIIHKIHDDGKGP  
NVLGKEGQGAIHLVAALGYDWAIPIVAAGVNIINFRDIRGWTALHWAACCGRERTVGALIASGAASG  
ALTDPTQOYPSGRTPADLASENGHKGIAGFLAESALTSHLSALT LKESPSGNVEEICGLTAAEGFAASSS  
QLACVNSQEESLKDSLGA VRKSTQAAARIFQAFRVESFHRKKVIEYGDDDCGLSDERTLSLVSLRNPKSG  
HGDSHSAAVRIQNKFRGWKGRKEFMLIRQKIVKIQAHVGRGHQVRKKNYRKVVWSVGIVEKVILRWRK  
GRGLRGFQPEKQLEGPSWQIQPAKAEAEDEYDFLKDGRKQATGRLDRALARVRSMNQYPEARDQYRR  
LQACVNSLRESQAMQDRMLADSAGTDGGDFMTELEELCRDDGDAPMSTIS

>ZmCAMTA7a

MLEEDYMHIVLVHYLETGGKSSRARGNNIIQEA AVGSPSQIMEVESSLGQASEYEEAESDIYSGGAGY  
DSFTWMQQHENGTPVIDSSLFSSYTPASSIGNYQGQHATQNKSFYPVNQHNGPLILNGSSDMLGTNG  
RANQTDLPWSNSVIELDEPGQMPHLQFPVPSDQGATTEGLGVDYLTDFDEVYSDGLSLNDIGAAAGTHGK  
SYLQFSSATGDLSATENSLPQQNDGSLEEA AIGYPFLKTQSSNLSDILKDSFKKTD SFTRWMSKELPEVED  
SQIHSSSGGFSTGEANDIIEASSHEPLDQFTVSPMLSQEQLFSIVDFAPNWTYVGSKTKILVAGNILNDS  
QITERCKWSCMFGEVEVP AKILADGTLICYSPOHKLGRVPFYITCSNRLACSEVREFEFRPTVSQYMDAP  
SPHGETNKVYFQIRLDKLLSLEPDEYQATVSNP SLEMIDLSKKISSLMASNDEWSNLLKLAVDNEPSTAD  
HHDQFVEKLIKEKLHVWLLNKVGMGGKGPSVLDDEGQGVHLHAAAALGYDWAIRPTLAAGVNINFRD  
VHGWTALHWAACGRERTVVALIALGAAPGALTDPTDFPGSTP ADIASANGQKGISGFLAESSLTSHL  
QALNLKEANMAQISGLPGIGDVTERDSLHPPSGDSLGPVRNAAQAAARIYQVFRVQSFQRKQAAQSED  
DKGGMSDERALSLLSVKPPKSGQLDPLHSA ATRIQNKFRGWKGRKEFLLRQIRIVKIQAHVRGQQVRK  
HYRKIVWSVGIVEKVILRWRRRGAGLRGFRSTEGSVESSNGGTSSSSIQDKPSGDDYDFLQEGRKQTEER  
LQKALARVKSMAQYPEARDQYHRILT VVSKMQESQAMEEKMLEESAGMDFMSEFKELWDDDTPIPGY  
I

>ZmCAMTA7b

MASAEARRLAVVPQLDIEQILKEAQHRWLRPAEICEILKNYRNFRIAPEPPNRPPSGSLFLFDRKVLRYFR  
KDGHNWRKKNDQKT VKEAHERLKSIDSIDLHCYYAHGEENINFQRRTYWMLEEDYMHIVLVHYLET  
KGGKSSRARGNNMIQEA AVDSPLSQLPSQTMEGESSLQASEYEEAESDIYSGGAGHDSFTWVQQHE  
NGTGPMIASSVFSSYTPALSIGNYHGLHATQNTSFYPVNQLNSPVILNGSSAM LGTNGCANQTDLPWS  
NSVIELDHEPVQMPDLQFPVPPDQGTSTEGLGVDYLTDFDEVYSDGLSLQDIGATGTHGESY LQFSSGTG  
DLAATVNSFPQENDGSLEEA AIGYPFLKTQSSNLSDILKDSFKKTD SFTRWMSKELPEVEDS QIQSSGAF  
WSSEEANNIIEASNHEALDQFTVSPMLSQDQLFSIVDFSPNWTYVGSKTKILVAGNILNDSQITERSKWS  
CMFGEVEVPANILADGTLICYSPOHKPGRVPFYITCSNRLACSEVREFEFRPTVSQYMDAPSPHGETNKV  
YFQIRLDKLLSLGPDEYQATVSNPTLEMVDLSRKISSLMASNDEWSNLLKLAVDNEPSTADQQDQFAE  
NLIKGLHIWLLNKVGMGGKGPSVLDDEGQGVHLHAAAALGYDWAIRPTLAAGVNINFRDIHGWTAL  
HWA AFCRESTVVALIALGAAPGALTDPTDFPGSTPADLASSNGQKGISGFLAEC SLTSHLQVLNLKE  
ANMAQISGLPGIGDVTERDSLQPPSGDSLGPVRNATQAAARIYQVFRVQSFQRKQAAQYEDKGGMSD  
ERALSLLSVKPPKSGQLDPLHSA ATRIQNKFRGWKGRKEFLLRQIRIVKIQAHVRGHQVRKH YRKIVWS  
VGIVEKVILRWRRRGAGLRGFRSQEGSVESSSGGTSSSSIQNKSSGDDYDFLQEGRKQTEERLQKALARV  
KSMAQYPEARDQYQRIFTVVSKMQESQAMQEKMPEESAEMDMSEFKELWDDDAPIPGYF

**GmCAMTAs 2000 bp upstream sequences for cis-motifs analysis**

>Glyma.05G178200

ATGCCCCGATAAAAAAAAAAGAAAGCTACGTGTGACAACCCTATGAAGGAAAGAGATACCAACCA  
ACTACATTCTGAAGGAGAGCACCATGAGTCACGACCAGGAGGTGGCTGTTCCAGCAGGTGAAAG  
CCTAATTATGTGCATGTCGTGAGAAAGATAAGTCAAGTATTTCACAACTCAAAAAAAAAAAAAAAC  
AAATTGAAAAATGCCAAGATGTCAAACGCCTTGGATAAGAATACGATCGACAATACTTTTCCGG  
AATAGAACTAAAATTATATATGTTTGTGGATCGACCATGTTAAACTTTAGTTCAGACTTTAGA  
CAACAGAAAATGGTATTTTTTTTTTCAATTAATAGACAGAAAACATATAATACGTCGTGTGTTTTGT  
TTCAGTTTTCGCTTCTTCGATGTGAATAATACATGCCTTATATATATTACTTTTCTCGGTTCTTTTT  
ATCCACTAATAAACTACATTTTTGTTTATTTATTTATATATCTTTTTAATTATAACCATTATCAATATC  
TAGCTAATTCTTAAATACTTTTATACTCATCATAAATGAGAAAGAAATAATACTCTTTAGCAGCTA  
CAAATAATTTAACATCAACGAAAATTACTAATTTATATATATCTTTGACCTACAGATCAGGCTAT  
TCAATGCGCGGGAGGAAGTCCAACTAAATGTTAAACAAGAACAAGTCACTGAAAATAACAAGATAGA  
CGAGTCGGAGTACACGACACAACCCACAAAGCCATTTATGACAAGTACTTAAGAAGTGGCAAT  
CCTTTTATTGATGTTTTAATACGGTATTTTCAATTTTTGGCTTTTCAGGTGTTGCCCTCAGCTGCCAT  
TAGCTATTTTGTTCAGAGTTCATGAAGATAGTTCTCAAAGTAGAATCAACATAGATGATTATATA  
TATTTGATCTTTGAAGATGGGAGTTTCTCCTCATTTCTTAATCATGGTCACCTTTGTTTTTTGTGT  
GTTGGAATGTTATTATATGCGGGGGAATCGAGGGTGTCTCACACAAACAATTTAATGGTATGTTT  
CTGTTGATTTTTACTGATTTTATGTTTACTTAATAATAATCCGAAGAAAGGAAAAGGAATGGGGCT  
CAAAAAAATTTGATGCTTGGCTAATTAGACTTGAATTTTCTTCATGAAGCAAATCCTAAAAACC  
ATTATAATAGTTTTTTTTTATCTTCTCTTCCGACATAATATTGTGTCAAATCTTGTACGTAATTGG  
ATATAGAACCTATTATTTTATAACAACTTTTAAAATTAAAAAAAAAAATTGACAAATTGATTTTTTA  
AGTTATGCAAATAAAGTATATATATTATCATGTGTGTTGAAGAAATATTGATAACGGGTGTGTTT  
GCTTTGGCAGTTTGAATTGTTTACCCTTTAATTTTACGCCGACGGAAAAAAAAAATGACACAGAAG  
CTATAATATGTGTGGATCATTGGCTTCAAACGTATCTAAGAAAATAATTTTGAATTTTAAATTTTAT  
TAAAATTGATTTTAAAGTGATATAATTTATGTTTAAATATTAATAAATAATGATTAATATTTAAAT  
ATTTTTATTATAAAAAACAAGTTAATAGTAATACTTAGTATATAATCTTTTAAAGTGACACAAAAATT  
ATTTCAATTAATAAATTAATTTTTCATAAACTATTCCCTAACAAGTGTAAGGTTTACTTAAAA  
TAACAATAACTAGTATATTAACGTGATTTTAGAAAATCCAGCATGAATAAAAAACATTAATTTA  
GAATATTCATCTCTAAACAATTTCTTTTTTGGTACATATGTTACCTCTAAACAATTGACCCTAAAT  
TTATTTCTTAGCACATATCAAACGCCGTATATAATCCCCGAGTATAGGCCAAACAAAAATCT  
GAGAAGCTGCGACGAAAAAGGAAGGATAAGCCAAATATCAGTCAAAGTGAATCACACAATGC  
TATTTGACTTGGACAACCCCTTCAATGCTTTTTCTTCTTTGATAGTACAACACAACACAACAC  
AACAATGCTATCACAGACAAGTTCCCGGTTGAAAACTTTTCTTTTTTCGTTTATTGGTATTTGGTA  
CATCTATCTCCCTCTTAAACCCATTACACTCTCTCTCCGCTTAAAAAACTATCTGAACTTCTCT  
AGTTATTACAATTTATTACACAACCCATCTCTCTTTTTTGTTCGCTTAGATTTAGAAACACAGACT  
TTTCCAAAGTGCTCGTTTACCTCAAACCTCAGAAAAATAAACATCGAGTTATCACTTGTTTTCTTT  
TGTCGGGAGACAAAAACATTGATCAGTTCAGCTTCTCACTTCC

>Glyma.08G135200

TGAGATAAAGCGCTGCAGGTGAATGTTAAAATTACTCATGATTTTCAATTTTAAATTTTTTTTATACTT  
TGAAGGTCGTAAGTAATTTTATTTTTTTTCGGTTTTACAACCTTTGAAGTTGAAAACCTTTTTTCTAA  
ACAAAAAATTGTTAAGTTTTTTTTTTTTTGAATAATAAAGTTTATACTTTTTTATGGTTTATTTT

CTTCTAATTTTTTAAAATTATAAAAAAATTATTTAAATGTCAAATAAATAATTTTTAATTTTACTTAT  
TAATAGTTTTTTTATTTAATATGGTGTATATTTTTAATGGTTATATTTTATATATTATTAATTTATTTA  
ATGGTTTATTATTTAAAATATATCATATATTTTTAATATTATTTTATTTAAATATTTTTATTTATTTA  
AAATTTAGATAATCTATTAATAAAAAATAGATAATGAAATTA AAAACAACATACTACATTAATAA  
TGCACAATATTAAGAAAAACATAAAAAATATGCAACTAGCCGGATTTGTTTTGAACATTTTTTAC  
TGTA AAAATAACCTAATAATAAACTTAATATACA ACTAGTCGGATTACATTTATATATATATAT  
ATATATATATATATATATATATATATATATATATATATATATATATATATATATATATATATAT  
TGATATGTAGATTATATTATAAGTTGTTAAATATCATATGTTACCGTCTAACAAATATAAATGCAA  
ATATAATTAATTTTATGCATATGAACGTTATTGTAATTTTATAACCACGTCAAACA ACTCATTTT  
GCTGAAATTCAAATAGTCACAATATATTACTTAAAATAATAAAGATAACAGTTATTTAAGAATAA  
TCAATTTATTCAGTAAAAA AAAAAAGAATAATCATTTGCACGATTAGTAGAAATGTTTTACGTTA  
CTTTGAAGAGAAGTGGGGTATGAGTAACTTAAATTAAGTGAATATTTGGGTGAGATTGCATGCA  
AAAGAAACAAAAA AAAAAATCTTTGCCGA ACTTCTTCACTCTATTTTATCTAACACAAAAATTAT  
TTAAAATTATTTCAATTCAAATTCAAATTAATTATGAACATAAAATTAATCCCTAACAGTGTAAA  
AGTTTACATAAAATCACAATAATTTTTATATTAACGTGATTTAAAAA AATCGCATGAATCAA  
CACCATTA ACTTTTAGAATATTCATCTCTAAACACTTTCTTTTTTCTCTCTAAACAATTGACACTAT  
GTTTAAAGGAGTGATAATATATTTT CACAATATAAAATTTTAAATATTTAATCAATAATTTTATTT  
TTTATGTCACTTTCTTTTTG CCTCTAAACAATTGACACTATGGTTAGTCTTGACATTCAAGACAAA  
TATTAATTTAGATAACAACTGAAAAAATGCATAAGAAAAAAGTATATTAGACATTTTTTATTCC  
AAAAAATGATATAAACATCTATGAGAGATGCATCTTGAAGAATATTAGAGAGAGAATAAAAT  
ATATGTGATGAGAAAAA AAGTTTAGTAGTCAATAGAAAAAAGTTTTAACAAAATCTCAAAGA  
TTTAGGTGAGACGGTTTGATATATGTTTTATACTAAAAAATATGATAAAATTCATCAAAAACCT  
TTTTAAAAAATAATTCATCAAATTTTTTTTTTATAAGTTGTAAAAA AAGTTTTAATTAATATCAG  
CATATTTTATTATTTTATTCAA AAATCTTAAAAATCTTACTTAAATATCACAATACTTATTTAATCA  
TTTTAAAAAATTTGATTAAATAGTAAAGTGTCTTTTAAAAATCTTTTCAATTCTAATCTAATATATTCT  
TAATTTATTTGGACATATCAA AATGACGTCATACAGTCCCCGAGTTTAGGAAAAA AACTGAGA  
AGCTGCCACGAAAAAGGAAGGATAAGCCAAATATCAGTCAACTTGG AATCACAAGAATGCTCT  
GACTTAGACAGCCATTTCTATAGTTTTTTTCTTCTCTTTGATACAACAACAACAATGCTTT CACA  
CACAAGTTCCCGGTTGAAA ACTTTTCTTTTTTCGTTCA TTGGTATTGGTATTGGTATATTCATCTC  
CCTCTTAGCACCCCTTATTAGTATTATTACACTCTCTCTCCGCGTTAACAAA ACTATCTCTGAACTT  
TCCTAGTTATTACAATTTATTACACAACCCATCTCTCTTTCTGGTTTCGCTTAGATTTAGAAACACA  
GACTTTTCAAAGTGCTCGTTCTGTTTACCTCAAACCTCAAAGAAAAA AAAAAACATTGAGTTATC  
ACTTGTTTTCTTTTTTGGGAAGACAAAAACATTGAGTTCAGCTTCTCACTTCC

>Glyma.15G053600

TATTTAATTATAAATTATTATTATTATGATTTTTAAAGTAATTATCCTAAAAATGGGTTGTGATCGA  
ATAAAAATGAAAAATTATTTTATAATATAATTGTCTAACTTAATTTTTTTTAGATGAAATAGTTTTA  
TATAAAAGATAACTATGATTTAAAAAACGAAGGTCTACTGTTACTCTTCAA AATATCTTAAGC  
TATATTTAGACAAAATAACTTAAAATCTTCCAAAAA AATTTAAAAAATAATATAAATTTGTTGAT  
GCTAAATTTTAGTCTTTTAGATCTTGGGCTAAATAATTATTAGGGTTAGAGTATTTTGAACCT  
GGACATATTTTAGATCTTGTGTTAGTTTTATGGGCTTTAGGGTGATTGTGGGTC AAATTCAAAC  
AATGACCCGATAAATACAATCCAAAAA AAGTTGGATTGTTTGTATCATTGTTTAATTTCGAAT  
CTTAAACTATGAATTTGATAACTTTAATTTGAATATCAGATTTTAAACGTGTAAAATTCAA ACTAA  
TCCAAACTTATACTATTTTAGAAGATTTTAAATTTCTTATGTTGCGTAATTCATAGTAATGTAATT

TTTATGTTATATAATTATATTATTCTTACTTTTAAATATTATTTATTACCTTTATTTTATTATGATTTTTT  
TATAGTTTCTCTATTATTTTTCCATTTTGTTTTATTATAATTTTTTTTTATTAGGTGATCTGATGACC  
CACTCAAAACAACCTTACATGTGACTAGTTTGATTCAGTTTGGGTTATATTTTTTTATATAAAAATAA  
AAACAATCCAAACCAATTTGTTTGGTTTAAAATATCTCCTAAATCCAAATGAATCCAAACCATGA  
TCATTCATAACGAATCGATCATTGGGATAAAAATGGTACACTCCACACCACACTACATTAATGAG  
AGGAAGCTACTAATCAAATGATTATAGACCTAATAAATAATTTGTCTGTAAACCATATCAAACCA  
TTCATTATTATTATTATTATTATTATTATTATTATTATTATTATTATTATTATTATCTCTATATTTAAT  
TGTCTAAATAGTTTAAATTATTTCTTTCAATCTACTTTTTATCTTTAAATCAAATTTCAATAACTTTTT  
TAATAAAAATATCAATAATTAAAAATAACTTTATATCATAATTAATAATTATTTATTATAAATTTAA  
AATATAATTTAGAGAGCTTAGTTGACTTAAAAATTTAAAATATTACGTAAAAAAAATCTAAAATC  
TAAAATATATATTAATATTTAATATTATTTATTTACTAAAAATTTCAATTATATAAAAAAATAGT  
TATCTTAAATAAAAATAAAAATATTATTTAATAATATTTCACTTTAAAGACCTAACATTTATTCATGA  
GTAATTAGTTCCTATTGAGAAAAATAAAGATAAAAACGTTAAAATAATCTGATCTAATTATTCAC  
TCCTCTAATCACTTAATCGAATTAGATTCTCTTTATATCTTTTTCTTTTAAATTTTTTTAATTATTGAAT  
TTGAGTATATAAATGTTATTCCTCATAAATTTTGTATCATCCCATTTAATTTTCTTTTCCAAAAGA  
TTATCAAAATGAAATAAATATAGGAAATAAGGAAAAGGAAATGAAAAGGATCCACTTCCCAA  
AAGTCAAAGTCAAATACATCTAACAAATTTTTAATTTTTTTTTCTTTTTTTTTACCTTTCTTCGC  
ATAATTTATTTTACTAAACACTCTTTTTCTCCTTACTTTTTATTCTCTCCGTTAATAATTGTAAAACA  
TTTATGCAGAAGTATTTTTACTCTTTTGCAGATAACAAAACGTTCAATCTTTTCTTTTATTATCTCAAATGGATTAA  
AACATATAAATCATAAATAAATCCGTTAATAAGAATTGAGACAGCGTTGTATACTTTTCAGTA  
ATTTTTAATTGATAATACTAGTAGTAAAAGTTACTCTGCTGTATAGTATAAATACTAAATATACAG  
TATCAGTTTTTTCACTTTATCGCGCGTCAGTTGAGAAAAGGAAAAGAAAGGATAAAAAGAAAAG  
AAAAAAAGTCTCTGTCTCTCTCTCGTCCTTCGTCGTTGATCTCAGATTCAGTCTTCGCC

>Glyma.08G072100

AAATCAATTTAAAAAATAATGATTAAAAATTATTACAAATAGTAAAATCATCAACATTAACCG  
AAGAAGGATTAAGAGTAACTTTTAAAAAAAATTAAGACTAATAAAGACAAATTATTTTTTTAAA  
GACTAGAAAATAATTATCTTTAAAGGATTAAAAATATTTAATTTTTTTATAATTTTATAATAAGAA  
ACTAAAAAATCTGCAGACTGCGGAATCAGTCCGGTATGTGGCGGCATAAATCGGGCACTTCTT  
AATTATTTTTACTTTTCTTAAGAGAGAAAAAAAAGGCCAAGAGATGCATGTGCATTCTTTGAAA  
GTTGAAAACGGACGGTCCGGGTATCCACCTACCCGATCGCCACGCGTCCAAGAATGATGGGCT  
TCAAAAACATTTTGGGAATAAATAATTCAATTTTTTTTTCGAGACACAATAATAAATTAATAATCT  
CAACTTAGGAAACGATTTTTTTCATTATTTTACCTTTCCTATTAGATACTCCCATTTCACATTGT  
TCCTTTTATTTATCTTCAAGATACATTTTATACATTGCTCTTACAATTAATTAGAAATTTTTTATTAA  
ACATTTTAAATAAAAACCCAATTTTACTCATAAACAAATAAAAATGATTTTATCTTTATTTATATA  
CTTCATTTTGTAAATTATATATATTTATTTAATGTAAACTCTTTTTTTTTATTTCAAATTAAGTTCTAA  
TAGTTTTCTTAAAAAAGTATTAATTATTAATAAAGTAATCTTACCATAATTTAAATTATTTATTATGA  
ATTCAAAATATTATGAATTATAATTATATAAAAATATTTATTCTGTATAAATACGCATGTTAAAATA  
ATACTCCAAGTATTGATGAATGGTATTGTATCATTATTCTGCACCAATCAAAGTCATTTTCTACG  
GGTTTTATAGAAATTAATTTATCTTATATAATGCCTTGTGTAGGCTAAATACTGCTTTAAAGTAT  
CGATTTTTTTATTTATAAATATTAATTATTAATTTATTAATTTTTGTTAATAGTTAAGAAGACTTCA  
AACCCACTTATTTCTTTCTTCTTTCTTATCATCAAATCAACTCTATTAGAGGGTGGGTGGTG  
CTGCTTTGTTTGTGCCTTTTTGCATGTATGTTCTTTTTGTCTTCTCTTTTTATAAGGAGAGAAAAG

ATGAGAGTGAGGTGATATGTGAGTTAATTTAATCATACAAAAATCGGCTTGTAAGATTATTCCTT  
ATTTATATAGTTTATCTTGACACTATTTTTATTTATCATGAGACTTGAACATGTCCCATCACCACAT  
CTCTCCTCACGCTTATCAAGGCTACCTTCCTAGAGCGCGATAATCATAAGAATCTTTTCACAAA  
CTAACTTATCAATATTGCCGGTTAAGATAAAGATAAATTCATTCTAACCTATTTTATATATTGTAG  
TACAAGATTGTTGGATAAAAATACAAATAATCTTATTAGTATTGTGTGATAAAGATAATTTTGTT  
TAAATTATTTTGTATATTATATTACAAGATTTTTTGTAGATAAAAACACAATAATCTTATTAATAT  
TACATGTAAGATAAAAATAGATCTATTATAACCTCTCATATATAATATTTAAATGAGTAACTTG  
AACTCATATTATTTCAATTTAATCAATTTTGAATTTACATAAATAATCTTATCAACATTTTCATATT  
AGACTATGATTCAAATAAATAATTTTTTAAGAATTTTATGGAGGATAAGAATACAAATAATCTTA  
TCAATATTGCATGTGAAATAAAATCAAAGATAAATTCGTTCAAACATGTTATATGTGTTATACTA  
CAAAATTTTATACCAGATAAGAATACAAGTAATCTTGTCAATAGTGCGTCATAACCTCTTATGAG  
CCAGATAGAGACCAAGCTAAATTCTTTATAACCTCTTATATATATATAAAAATAAAATATGATAAA  
AAACGGAAGAAGCAAAAATATAGGTGGTAGCTGTCCCGCCTGTCCGGGTATTCACTTCGTCAC  
GTCACTGTGTGAAAAGAAGCTGACTGAAAGAGCGAAAGAAAGTAAGAACGAACGAGCGAAA  
GCAAAAAGTGTGTGTTGATTGAGATACTGCTAACTCCTTCAACGTTTACGCGTGGATCTCTCTCT  
CTCTCTCTGATTCTTCGGTCTTCGCC

>Glyma.05G117000

CGGAAATGGCAATTGAGGGAAATAAAAAACAAAAACAAATATGAAAGCGAGTTGTTTATTT  
CAAAGTATAGATTGGATCCAACCAAACCTGCACTTTTAGTTATAACTAATAATTTTAAAAGTGCC  
ACAAATTTAAAATTTAAAATAAGAAATAAGAAAACATACCCAAAAATATCATATTGACATTTGAT  
CAAACACATAACCTGCAGCCAATAAATGTCCTAATGAACATGATCAGAAAATGCATAACTGTGA  
GCACTAAAATACCACTGAGCCACATACACCATGATCCAAATAAAAATTGCAAAAATAAAAAC  
CGCAAAAAGATACTGTGAGGTGTAAAGCTTGCATGCAAATCCAAATAATTAAGCACTGAGGAAA  
ATACATAAAAATTATAGCTTACCTCGTAGATTATCCCGTAAAACCTCTGAACAATATCAGAAATAT  
GAGTTTAAAGGAAAAAATAGCAACGAAGCATCCAATAAAACCACAAAAAATCATACAAAAAA  
ACATAAACACCGTTTTAATAAAATCAAATAAAAAGAACCTCTATCTTCCTCTTAATTTCTTCGACA  
ACTTCTTTGTCAAAGCTGCTGTTGTTACTGTAGCCTGTTCCAAAAATAAAACCTGTTAATTTTTTGC  
TTTTTCTTTTTCTGGGGTGCATTTTCTAAGCAAACCGTGAAGAAGTGAAAAAACACAAAAGGAA  
TAGAAAGAAGAGTGAAAGGAAACAACACGAGTTGGTGAGAATGTTCCAAGTGTTCTGTGAGAT  
CCTCGTGCAGAGACCAAAGCGAGCAGCAAATGAAGAAGAAGAACAAGAATGCATTGCG  
AAAAGCGGGTGGCTTCAGCATTTCGGGGAAAGTTCAGTTTCCGAACAAAAAAGAGAAAGAGAT  
AAACAGAGAAAAGAGAAAGATTTAAGATTTGAGGAATAGAGAGTAACGTGGAGAAGATTGAGG  
AAGAGAAAAGGAAGATTGAGGAAGGGAGAGTAATGTGGAGAAGATTCAGGAAGAGAGAGGAA  
AGTTTCGATTATTAAGTGAAATTAATGGAGAGTTGAAATCCGCCAATCAGGGAGTGACATATGT  
TCGAAACTGCACATGCAACACGACACGTGGCAGGAACAATAGAAAAAAAAGTGCAAAAAAAT  
AAAGGGGCAAAATGACAAAAAATTAAGGAAATGGATAGGTGTCACAATCTTAGGAGGGACAC  
AATAGGCTTTTCGAGGGACTTCTCTTTTATAGATAGTATATAGATATTACAAGATTTAGGGTTGAA  
AAGAACATAAATAACCTTGTCAATATTAGGTGTTAAATAAAAATAAATTTATTCTTACTTATTTTA  
TATATTATAAGATTTTGTGTTGGATAAGAACAACAACTAAATAAAGATAGTTCCATTATAATATGTT  
ATGTATAGTATTTAAACCGAGTTAATTTGAACTTGTATTATATTGAATTTGAATTAATTTTAAATCA  
CATAAATAATCTTATCAATATTTTCATATTAGTTTTGGATTCAAATAAATAAACTTTTGAGGATTT  
GTATCATAAAAAGAAATATAAATAATCTTATCAATCCTGTGTGCATGCCAAAAGTAAATTCGTTCTA  
ACATGTTATATTATAAGATTGTCAAATATAAATTTATTCTAACATGTTATATATGATATATTACGA



GATTTTGTATTTGTTAAGAATACAAATAACATTGTCAATATTACGTGTCAGTTTGAGACAAAATA  
AATTTATTTAACCTATTAACATGTATGTAGTAAATTATATTACAAAATTTGGTGTAGATAAAAA  
CATAAATAATATTGTCAATATTGCGTGTGGACAGGGATAAAGATAAATCCGTTATAATCCTTAT  
ATATATATATATATATATATATATATATATATATATATATATATATATATATATATATATA  
TATATATATATATTATTTGATGAATTTTGATAAAAAAAACGGAAATATAGGTGGTGTCTGTCCCG  
CCTATTCCGGTTATTCCCTTGGTCACGTCACTGTGTGAAAAGAAGCTGACTGGAAAGAGCGAAAA  
GCGAAGAAAGTAAGAACGAACGAAAGCAAAAATTGTGTGCTGATTGAGATACTGATAACTCCT  
TCAACGTTTCCGCGTGGATCTCTCTCTGATTCTTCAGTCTTCGCC

>Glyma.08G178900

TTTAATTTCTTTTGAGTGTATTTAGTCATTATATACTTACAAAAGTATAAGTAAAAACAATTAT  
TATTA AAAATTTAATTTTACAAAATGTAAAATAAATTTTAAATTTAATTAATGCAAC  
TCAAGTCAATCTAACTCATAAACATCCCATATATATATATATATATATATATATATATATATAA  
TTTTTTTTTAAATCTCATAATTCTTAGATTGTGTAATTTTATAATTCTTACTTTTAAATATTATT  
AGTTTTCTTTATTTTATTATGATTTTTACCAAAGATTTAACTTAATTGATAAATGTTTTTTTATTG  
CCACATATAAAAATAATATTGTGATTTTCTTTAATTTATATATATTATTTTAAATGTTTCTGTCAA  
ACCAACCCGAATATAATCAAGCTGGTGGGTTGAGTTATCGTTTTTTTTTTTTGTTGATAAAAAC  
AAATCAATCCCATCCAATTAATTAATTATTAATTAGTTTAGATTA AAAATGTCTTCCAAGCCCTG  
AATTAACCTAACCCGTGATCATCCAATGGATCCAATCTGGAATGAAAATCGTGCCTCCACAC  
CAGACTACGTTAATGAGAGGAAGCAACTAATAAAATGAATATAGACCTATTA AATAATTTATCA  
CTCAATGTCAAACCATTTTTTTTATTATCTATATATTTAATCGTCTAAAAGTTTCATTATATTTTTC  
AATATGCTTTTTTTATTTTTCTTTAAATTA AATTTCAATAACTTTTTATAATATATATATATATAT  
ATATATATATATATATATATATATATATATATTATTTAGACGTTCACTTATAAATTTTCCAGAATAT  
AAAGTTATTGAAATAAAGTGAGGAGAAACAACGTTTTTTTTTAAAATGGTGAACGCTTTGTTATTT  
TCCAAAGAGTAAAATACTTCTCCATAAATATTTTACAATTATTAACGGAGAGATATAAAAAGC  
GAGCAGAAAAAGACTGTTTAGTAAAATAAATTATGCGAAGAAAAAGTAAAAGAAGAAAAAAA  
ATATTA AAAAGATTGTTAGATGTAGTTTGACTTTGACTTTTGAGACCAATAGTTGAATGGAAAAT  
GAACCTCTTCATTTTCTTTTCTTTCAATTCCTCTGTTTCTTTGTTTTATAA ACTTTTTGGAATATAA  
ATTAATTGAAGATGACACACATTTTATTTTATGAAGAGTAACATTTATTTTGTCAAAGTTTAGTA  
ATGAAAAAATGCAAGGAAAAAATAGAGAGAATTTAAATCCGGTTAAGTGACGTTTTTTAATAG  
ACAAATAAATAATCGGATCGGATTTTCTGATGACCTTGATCTGAAAATCCATCTGTTATTTTGT  
ATTTGGGGTTACTTATTCATGAATAAATTTCATAGGTTTAAAGTGGAATATTA ACTAATATATATT  
TATTCAATAGAAATATTTATTTTTTATAATTA AATTTATAATAAAGAAATAATTTTAAACATAATT  
AAATTATAATAAATGTTATTATAATATTGAATATATAATTTATATTTTAGTTTTTACATATTATAA  
ATATCTTTAAATAAATTTTCTCTATGACACAGTTGTCTCATTAAACCCAAAAAAGTATCTTAAAA  
AAAAGTAAATTTACACGAGTTAGGAAAAA AATATAAATGATAAAAATTTATGAATATTTGAT  
GCAATTAGATAGTTAAGATTA AATTTAAGATAAAAAAATTTAACTTAATTAGTTGAACATCATAT  
CATACATAAATTATTATAAATTTAATATTATTTTTTATTTTTACAGGTAAAAAATATATCTAAAA  
TCATTAATTAAGTTAAAATAATCTTTAAACTTTTTTTTATATGTTGGATTAAGCTAGTTAAGCTCTC  
TAATTATATTTTAAATTTATAATAAATAATTTAAATAATGATATAAAGTTATAATAACAAAAGCTT  
CAACATTTAAACAAAAGAAAAAAGTTTCTATCAGTTTTTCACTTATCGCGTCAGTTGAGA  
CTTGAGAAACAGTCCAGGAGAGAAAAA AAGGATAAAAAGAAAAGTCTCTGTCGTCCTTCGTC  
GTTGCGGTTGATCTCAGATTCAGTCTTCGCC

>Glyma.17G038800

ACTATTAAGATTTGGTTGGATTATTTAAATAAAGTGAATTCAATATAACTTAATTAAGTATGATTA  
AACTGGATTGAAAGTCAAACCTAAATTCAACCTAACATGTCTCTCACTTACTTTCAAATGGACTTC  
CAAATTGTAAGTATATTGGAAAAATAACAATAAGGCAATTGCTTCGATCCCCCTTTTTTTGCTTCC  
TGTACCAACAAAAAGACTCAAACGGACAACAATGCCCTTCATCCAAACACTCAACACCACCGT  
GCCTCAGCTCCATGTAACCACCCAACACGACCCCTTCTAACAAACACCACCACCCAACACCGTT  
GTCAACCACTATGATATAGGGGAAGAAGACACACACAACATCAACACACAAGAAGTGTAAAAT  
GCCATAATTATGGAAACTCCTTTTTGAAATAGTTTAAAAAAATTGAACATGCCAAAAAGGATTTT  
CCAAAATGTTGTCACGTTTTAACTTCCTTGACTCCATGCATGGTTCGTGGGTGGCGACATGATGT  
TGGATGCAAGGGGTGGTTGGGTGGTGGATCTGGTAATGTTTTGGTTAGGTGGTGGTGGCGGCTAT  
GGAAGATGTTGGCTGAGAGGAGGAAAGGACATATTTGTCCATTCATGTTTTCTATGAGGTGCAGG  
AAGAAATTGTCTAACATAAACAAGTATTATAGTAGCTGAAAGACAATTGCTTTAGATACCCAAT  
ATTTTTGTTGGGATACCCATCAACACAATGAAAGGACTAAAATGTCCTTCCCCTTTTTACGGATCG  
GCAATCCGTATGACTCATAACAGATTGACGATCCATATGACTCATAAGGATTGACGATCCGTATGA  
GTTTTTCTTTTTACGGATTGTCAATCCGTAGGTCCACACGGATTGTCAATCTATATTGGGTCTAC  
GGATTGTCAATCCGTAAGTGGTCCATAGGATTTTTTAATTTTTTTTTAAATATAATTTATGATTTAAT  
TTAAAATTAATGGTCCAAAGAGGAATCAAATTTATGTCTCTCACATTATTAATAAAAAACTCAA  
ACCAACTGAACTAATAGACACATTATGTTATAAACAAATAGTGTGCTATATATAACACTAAAAT  
TTCTAATTTATATTTAACGTATATGTAATTTACATAATAAATTTTGAAATGATTATTTTTTATCTA  
ATAATTAATTTGTTTATATATAAAAATTATAAATAAAAATCATAGGTTTAATAAATATTTACATAT  
GTAAAAAATATCAAATTTATTTAATTATCAATTGTTATAAAAAACATATAAATACATCATTCAA  
TTAAATATCATATTTATTTAATTTTTAATCATTATAATAAACACCTAAATACATCATTACAGTTAAAT  
ATCAAATTTATTTAATTATCAAGTTTTGTAAATAAATTAATGAATAAAACAAAAAAATTTTAA  
AAAAATAAAATTTACTTTTTTAATCATTATAGTTATTCGGATCAACAATATCTACGTGTTTTAAAA  
AAAATTCATACGAATTGTTATCCGTATGAGACGCTTCAACCAATGGGCTTGCAAATTGTCCTTT  
TGGGCTTGGTAGCTGGTGAATTTAGTAGATGAATGATGGAGATTAAAATATGATTAGTGGCCATAA  
GACTAAAATTAAAAACGTCATACATTTTTCTAATCTGTTTTCGTTGATAACTTTTATATGCCATCTT  
CGTTGTTTCATGATTAATAAATTCATATTTCTTTGTGAATTTTTCTATGCAAATTGAATACCATTG  
CCAATTTGGACCTGGATCGATATATCTTTTTTTTTATGAACTAACATTTTATTATAACTTTTTTTTT  
TGTTAGCGTATGCCTAAAATGGGTATTTGGGTGCTAATTCACGGACCAATTCATATTAAGTTATA  
TGAGTTTACGTTAAACATTGAGGAATCTAGTTAAAAAGGTTGCGTCAGTGTGTGATAGATACTAC  
CTAGGACTAGGAGGCCACAACACAACGAAGAACCCGCTACTATCGTGGACATGCTTTGGCTTA  
CATCGTAAGAAACAAGTGCCACGTCGGACATGTGTGAACGCTACGTGTTGGGCTTTGACTTCAAC  
TCTCTTTTTCTTTAAGTACCTTTCACGCGCCACCGTTGCTCTCCGTCCCTGTCTTGTCCCTCTCTTT  
TCTTTTCATTATTATTCCTTCATTTCTATTTCTTCAACACTCTTTCATTTCCCTCTTACTCTGTTTTG  
GCCTTTCCCTTCATCGCTTTCATCCAATTCAATTCAATTCTCTGCACTGGCTTTTTGAAATTTCCATG  
TGTGAGCGAGAGATTATTGCTATGTTGTAATC

>Glyma.15G143400

GAATATATAAAATATAAAAAATAAAATAAAGAAAATAAATTGATATGAAATTTATTATTCTATC  
CTTTTACTTTTTAGGTTTAATTATTATTTTTGTTATTTAATTTGTTTTTTAGTTCAATTTAATTATTTAA  
TTTATTTAATTTGATTCAATTTGGTTCACGACCTTAAGTAATACTAATAAATTATGTTTTTGTCTCGAT  
AAATTAATAAATTTGTTTTTATTTTAATAAAATTTTGGCTTGAGTTTCAAATAAAAAATAT

ATATGTTATTTTGTTC AATTTTTTCATTTTTCTCTATTGTATATAGATCATTGTTATTATTTCTTATT  
AAATATTTTTCAAAGAACTAATATAAAATAAACAAAATTTTATAAAAAAATTAATAAAAA  
ATAGATATATATTAGAAAGACTAAAATAAAATAAACAAAATTAATAAAAAATTAATTTTAT  
TAGAAATTAATAAAAAAAATTATGAAAGAATCTAAATAAGATTTGTTAATTTATTAGAGATTA  
AAAATATATTTAAACTTTTTAAATTAATTAATTAATTAATTGTCCCCACTGATTAACAACTTCT  
ACATCCGTCGGTGCATTTAAAGCTAGTTAAGAAGCTTATGAGTATATTAATATTGAAACTCGTGCTT  
AAAAATTAATAACTATTAATAAATTCAAATGTGAGTGATAGAAGTTCCTATATAGTATTAGTTC  
TGAATGCCGAGTTTGGATTCTTTGGAATGAAGGAAGGAAAGCAAATAAGAGGACGATGGAGGG  
ACCGAAAAAGTACTGATAATTTTCTTCAATTATTGAACGACAGCTTTATGGGAAAGGATAAGA  
AAAAATGTAGAATCAGAATTTTTGTAATCTGTCCACTTTTAAACGGAGTGGGAAAATACCTTA  
ATTTTAGCATTTTTTTTACTAAAGATATTTATAATATATATTTTGTATTATTTTTTATAAAAGACAAT  
AAAAATAAAATAAAAAGTGATTAATAATTTATTTACAAAATTAATATTAAGTAATTATTTATT  
TTAAAGTGCATCAAGAATATCTCTTATCAGTAATCAGAGTTAATTCCTTCCAAAGCGTAAAAGTT  
ATCAACCCATGACAAATATTTAAAGAAGCTCGTTATTAACCAATAGGAATGGAATTAATACATAT  
TCTATCATAAATTATAGAATATGGTATTTAGACCACAATCTGTCAAAAAAAAAAAGAAAAAGA  
GACAAAACCAAATACTTGCGCGTGTGCTTGTATGCAATTTCCCAACAAATTTGGGGAAATAG  
ATTTGTTTGTGAATACTACATAGTTTACATACAAATTGGATTGGAGTATATATCAAAAAATGC  
ATTTGCATGCGACATAATGATTTGATGACGATAACATGGCACCGTTTTCTTGGCTTTGCCGATTT  
GTACTGTAATAATCTTCGACCCCTCATTGAATATTTAGTAGTCATTTGTTATTTTCTAGAATATTTT  
ACATTAATTTCAATTTAAAAATAAAAAATATTAAAAAAGATAAATTAATAAAAGGAAAAGTGAG  
GAGTTGTATTAAAAAACAAGTGCATTATCGTATGAATATAAAATTTTCATTCTTTTCAAGGAAA  
TAAAAATGTGTAATATAAATTTCTTAAATGAAATAATACTTAAGAAATCTGTCAAAGAATTTAA  
CTTAATTAGTTAAATAAATACATAAGTTATTATAAATTTAATATTTTGTATTCCAATGAATAA  
GAAAAATGAGATAATAGGAGTGCTACGGTTAAGTAACACTGTAATTTGATGATGTTCCCTCTAAA  
ATTGGATGGAATAATGGATTATTTATATTTATATTTTTTTCTTCAACTTTTTCCGCCATAAAGA  
AAAAACCCTTTTTCTTTTTACTTTTTTTTTCTTTCTAAAATCAATCATATATGAGAGAAGCCAAT  
GAAAGAAATTTAGAAGGCGAGAATTTTTATTAAAAAAAAGAAAATAATTCGAAAATAGTAA  
GTGAAGAAAGAAAAGCAACAGAGGAGACCTGAGTGACATTATTCAGTTCCGACTTACCGTTTC  
TCTTTCTCCAATCTCCGGAATCAGGTAATTTCTACCTTTTTCTCTCTTCGCATTTGACTTTTGAC  
TTGTTTTTTTTCTTTTTTTGTTCTCTCTTCAGTTCACAAGTATCTGATTCTGTATATTATCTGAC  
TTCTTGCCAAGGTTGTCGGTGTGCAATTGTTAGTTTTGTGCTAAGAGAAGAAGCTGTTGGGAAA  
GTTCTTTTGTGTG

>Glyma.09G038300

AAGTGACCTACAACGGTTTGATGAATAACTAAGCACTCCTTTATTTGTTAAAATTTAAAATCATAT  
CCATATCTAAGATGACTTAATGTTAATTTCAAGGATGTGTCAAATACCATGTAATTTATGAAA  
AGACGGACTCCTCCATCTAAATTTGGAAGGGATTATAGAATACAAGATTATTTATAATCATTGGA  
GAAAGTCTACAAAATTGACTATGGATAGAGGACTTTTGCACAATCACAAAATTTGAAAGTTGG  
AACTCAAACAAATGCAACATTTAACTTTATTTTATTTTGGACTTGTGCAATTTAAGTACATTATA  
CAATACTAATATCTGTAAATTTTTGTTTATAACTCTTGGTAATATATTTTGTGTAATAATGATGCTTG  
GAACATCATGAAAACATTTGTTGAGAATTTTTATTTATAACTCTTGGTGGTATATTTTGTGTAATTT  
TTTGTTTATAACTCTTGGTGTGGTAGTATATTTGTTTATAACTTTGGTTTATTTTTAGAGTTTAAA  
AAAAGTTCAAAAACCAACTTCAATTTTTAGAAAAATCGTGATTTAAAAAAATCAATGTTGTTTT  
ATCGATTTTTTTAAAATCAATATTGTTGTTTACTCACCATATCAATTTTTAAAACCGATGTTTGT

GAGATGAAAACAACATCAACTTTTGTAAAAATTGATATTATTGTTTGGTAAAAACAATATTGATTTT  
TTAAAAAATGGATGTTAACATTGATACTTTTAATGTTAATGTTAGTAATTTCAATATTAATTAATA  
ATCGATATTAAGTTCTTAATAGCCAATATTAATAATCCATTTTCAAATATGAAATAACAATCT  
CATAACTACTATGTGTGTAAGTATAAAGAGACTAATATCCATCGAGCAAATTGAAGGGATAA  
AATAATAAATTATAATAATATGGTATTTAGATCACAATATGTAAACAAAAAAAAAACACAAAAT  
TTGCGCGTGTGCTTGTATGCAATTTCCCGACAAATTGGGGTAAATAGATTTGTTGACTTTGTTGT  
ATACGAGTACATACTTACATACAAATTGGAATTTATATATATAAAAAAAAAAAGCATTTTGCATG  
GACATAATGATTCGATGACGATAACATGGCAGCGTTTCTCTGGCTTTGCCGATTTGACTGTAAAC  
AATGTTCAACCCTCATTTCGTCCTCCCGTGCAAAGTGCAAACCTTTTCTACACAGTGAAGAAAAC  
TTTGGGTCGGTATTTCGGAGTTAAAAAAGAGTGGAAAAAATTTAAAATGAACAGTAAAATTA  
ATTAATTTTAATTTAGAATTTTATTTTAGTGCACCTTATTTTATTTTATTCCACTTTATTGAACAA  
ATTCTTTGGAAGTGTTTATTTTCGTGAGCTCACTCCTTAAATATTAGGTGAATTTGTTCAATCTTTA  
AAAAATTAATAACTGTTTTTTTAAAAATAAATATGATTTATTTCTTAAAAATAAATAAAAAATG  
ACTTATTTTAAATAAAAAACAGTTTATCAAACACATAAAAAATATAAAACTGTTTATTTTACTAAG  
AAAAATACTTTTTTAAAAATAAGTTTAAATAAACTCATCCAATTTATTTTTCATCAAAAAGATATTTA  
GTAGTCATTTGTTATTTTCTAAAATATTTTACATGAATTTCAATCTAAAAGTAAAACATTAAAAA  
AGATAAAATAAAATAAAAAAAGTAAGGAGATGCATTAAAAAATAATTCTCATTATCATATGAAT  
ATAAAAAATTCACCCTTTTATAAGGAAATACTAAAGGAGAAAGAAATACGTGTAATATAAATTC  
TTAAAATTAATAACAACCTTAGGAGACCAATGGAAGATGTGAGATGTTAGTAATGTTACAGTTA  
AGTCTCACTGTAACCTGATGCTCCCTCTAAAATGGATGGATTATTTTATATTTACTTTTTCAACTTTT  
TTCTCTTACTTTCTTTTTTTCTTTCTTTCTAAAATCCATCATATCTGAGAGAAGCCAATGGCAGAA  
CTTTAGAAACCGGAATATTTTTCATTAAAAAAAGAAAATAATTAGAAAATAGAAAAGTGAAGA  
AAGAAAAGGAACAGAGTAGCAGAGTGTCAATTTGCCGTTTCTTTTTCTCCGATTCCAACAGAC  
CAATCAGGTAAAATTCCTACCTTTTTTTCTCTCCGCGTATTTGATTGTTGACTTTTTTTTTTTTTTG  
TTCTCTTCACTTCACAACCTGTTTTCTGATTCTATATATTATGCTCTTCACTTATTGTTCTCTTTG  
TTTGATCATGTCTTTGCTGACTTCTTGTTAAGGTTGTCCGTGATGCAATTGTTGTTGGTTTTGTGCTA  
AGAGAAGAAGCTGTTGGGAAGGTTTCTTTTCGTCTTTTG

>Glyma.05G148300

ACATAAAATTAATTTAGTTAGTTATTAGAAGTTATTTAAATAAGTTAGTTGATTACTCAAGTTATA  
GTTACTAAAAATTAATTTAAGTAAGTTAATGTTGATTACTCAAATTAATTAATTTCTATCTTTGTAT  
AAATACATCAATTTTGAATAATTTAATTGAATGAATGAATCCTAAAACACTTTTCATCTATCTT  
GTATTTCTTTCATTCCTAATATATATATATATATGTTAGAAGTAAAATTATAGTTAAAATTAATTT  
AAGTAAACATTTTAATTACACTTAACGGTTATAAATAAATTTATTTAAATTTAAAACAATCAGGT  
CTTAATCAGATATAATACTCAGGACTCAAGTTGTTAAATGATAGTTAAATACTATCTTCATAATG  
AATATTTATTTATTTCTATCAAATTTATAATAGCAAATAAAATACTACCATGCTCTGAAAAATAAA  
ATCCCATATGTGCATATGGAAAACGTTTGGAAATAATTTATTCCCACGATGGAAAGAATTTAAAAC  
AATGGGCAGTATGTATGACTCTATCTTCCCAAAGATTATCCAGTTTTCTTATCCAAGTTCAGCAA  
TTAACATGGCTTTGAATCAAACACGTGTACTCCATACACACTTTCTCTCTCGTTTCGTGTCATCATG  
GACCTGAAATTCACCTCTTGTCCCAAGTACTTCGTGAGGAAATGACATTGATTAATGCCACA  
TGCTTCTGAACCATACCCTCTCAAATTAACCTCAAATTAATTTAATTCACACACTTGTGTTGCA  
ATTTGTTTCAGTTTTTCAAATAACTGAAAAGAATTTAAAATATGATTAATAATGAGAAGTTATTTT  
AAATGTTTTCTCATAAAATCTGCTAGCATTCTCAAACACATGTAATATATAACAAATAAAAT  
GAGATTAATGAATAACATACTTTGAAATTGTTTGTGTTTGAATGTGGATGAAGTCAATGTCTTTTA

TTATTATTATTATTATTGAAAGTCAATATATCAACTCAAACGCCTATTACTACTAATAAGTTTTCA  
CCCACCTGAAATTAGTCCTGTACTTCAACCCCTCGTTCACACAGTACAAACTTGTCTTTTGTGTTA  
ATAATGATGATCAGATCTTCCTTTATGATGATATCATTGCTAATCAGGTTGCCAAGAGATATTCA  
ACCCACTCACCTCATTCACAATTTACATTTTGTTTTTTTATTAATAATTAATTTGACCTAAATACA  
TGTAGCGGCATTTTCTAAATTTATAATGAAAGTTTAATTTCAATATATTATGCACGGTAAATATTTT  
TATATTAATTAACTTTTTAATTATGGCATGCTATATTATTAATAATATGCATGATGAAACTTTTGATT  
TATGGATCATCCACTCAATAATGAATGTGTTTCGCCTTGCATATCTCCCTTTTTTGTGATGAAGTCCTTG  
CATGTCGCTTAAAAACACCTTCGCTCATTTATACATTAATATTTTATTAAGATAAAAAATGAAA  
ATATTTAAAATAAACACAATTATAATCGAAGAGTAGAACTATTTATAATATTTTTTTAATCTCTAT  
AGTCTAGTCAGACTTTTAATCGCGTACGTCTTTTGATATTTCTTTAAATATTTAAGAGGGTGGTTAG  
CAAAGTTAACAAAAAGTAAATTTTGTGTATAATACTACTAAATGTTTATTTAATTATAAAAAGGA  
CGACTACCTGATTGTGATTACCGCTTAGAAAAATCACACTTGGTCCAACCTTGAAAGTCTTTTTTT  
AATCGCTGTATTGTAAAGTCTTTCATATAGATCTTGAATATTCTAAAATTAATTAAGAGGGT  
AGAAAAGCAAGACATAGTAGTAGCAAATAGTAACATCTCTTGGTCTTGGTTCGGGGTCTCCAACCT  
GTTTAATAAAAATTGTATTGTATCCAAAAAAGTTGTTTAATAAAAAGCACGTTTCG  
TAACCTTAACCTTTATCACAACCTCAAATCAACTCTAAGCTAAGCTTCAACTAACGCCAAGTCCG  
TCTGTTTCAGCTTTCTGCTTTTGCCACTTCCTTCTCAGATCCATTATTCTTCGGAACCAACTCGCA  
CCGCAGCGAATCTAGCAGCTTCTGCGGTTCCAACAATGCTCTGTGTCCGGTCTACTACTTGTAGC  
TTTTTATCCTCGGATTCAACACC

>Glyma.18G005100

TATTAGTGAGATCAATTTTAGTGCCACGTGGACTATCCAACGTGACACTAAAGGATGATGTGGCA  
TGGCACGTGGATGTGCCCTCTTAAAAGATGTCACGTCAATTTGATGATAACAAAACGAGTAAATAA  
ATAATTTAGTCTCTGACTTTGTATCCTTGTTCATATTAGTCCCTAACTTAATGAAAAATTCAAAT  
AGCCCTTATCTTTGCATAAGTGTGCAAAATAGTCTTTCTGTTAAATTTTAAAGTAACGTTGTTAGT  
GAGGTCAATTTTAGTGTACGTCAATTTGATGATGATAGAATAAGTGGCTTCTTCAAATCTGATGGT  
TCTGAACCAATTGAGGCATATATAAGAAAAAGAACCCACATACACTTACACAAATAAAAAGTAT  
CAAAAATCCACAACAATAACCTTATCACTGCAGCCGTCAACACCAATGGACGAGGTCTGCATAA  
CCATTTCTTTCTTTTTTTTTCTTCAATTACCATCAATGTATCATTCCAGGTTCTGATTTTTTTTTGT  
GTTCTGAATAGGAAGAGAAAAAATCAGAGGAAAACAAAGTGGAGGAGAAAAAAGCAGAGGAA  
AAAGAAAAGAAAGAAGAAGAGAAAAAATCAGAGGAATAAAAAGATGACAAGGAATCCAAAA  
AGGAATCTGCGTCGCTAGAAATTGTGCAAGGCATAACCTCCGCAATGCATGAACATTTTAAGCAT  
GATTTATGACATCTTTTAAATTAGGGACCATTTTACAATACTTATGTAAAAATAGAGATTATTTG  
AATTTTTCATTAAGTTAGAGACTAATATGCAATATGTGTACAAAGTTAGAGACTAAATTGCATAT  
TACTTGTTTTGTTATCATCAAATGCGACATCTTTTAAAAGACACGTCCACGTGTCATGTCACGTC  
ATCCTTTAGTGTACGTTGGATAGTCCACATGGCACTAAAATTGACCTCACAATAACGTTAAAA  
TTAACAGAAGAACTATCGTGCAACATTTATGCAAAGATATGAACTATTTTGAATTTAACATTAA  
GTTAGAGACTAATATACAAAATTGCTACAATCTCTCAAACCTCAATTGTCTATTCATTTATTT  
TGATTGAAAGTTCGTGTACTGTATGTTGACATGTTGACACAGACAGGGAAATCAAAGG  
CAAGTGGAGTTCAAACGAATGATTAACGTCATCCACTAACTATGTCTATAGGGAAGAAATTC  
AAAAAGCAAAGAATGGTACATGTTAACTAATTGTCATATTTTACACGATGAGGGTGGAGCCTG  
GATTTGACTACTACGGTGAAGATGAAGTCAAGGTAAGCTCAAGAAGCAAAGTGTGACACTTA  
CGACTTATTCCGAGCGAGGTCATTCTCAACGAGCTCATGCTATTATTCTTATTACTGATTCACGTT  
ACTCACGGGTTCTTTCATATGTGGTATGAATCTTCATTTGTTTCACACTGCAAGTGAAGTGTACA  
CAACAACACTTAACTCTCCGTCCTGGTGAACCTCGAACGAATTTCTCCGACAGTTTCAAATTC

AAAACATTCATACTTAAGTTAAAAATGTTTTTAACAAATATTCATAAAAATTTTCATAAATAATAA  
CTAGAATACATTGACATTATAAATATTCATTATACTACCATCTAATCCGCCTCGAGCAAATAAGA  
CTACTAGAAAGTAGAAACAATTAGACTCTTTCTGGTTATTTAAGGTAATTACAAACTATTACTTTT  
ATTTTTCAAATTTTTAGTATAATTTTGAGAGTCAGAATTAATTTATCCAAACATATTATAAAACAT  
TCGATGTAAATGTAAGGTAGTGATTGATGAAAGAATTTTTCTTTTTTATTTTTAATCCTTTGTTTCAT  
CATGAAAAAATGATCTAATTCATTGGAAGTTCGATTGCACAATAAGGAAAGTCTAGACTAAAAC  
TATTTCCGTCAAAGATCATGTTTGAAAATTCAATCTTTAACTTTAACGAATTA AAAATCACTTGGT  
TACTAAGAAAAAGAATTAGTAATGTGTGTTTAGAATTAGACAAAATAAAAAGTGTAGGTAAGACA  
GAAGGAAAAAAGTAAACAAGAAACATTCTGGTCTCTTAGGTGATTGCAAATGCTCAGAATTA  
TTGGGGGTATAAAATAATGACACCAAACCTTTTTCAACCAAGTTATCTCTGTCTGTCAGTGGGCC  
AGTTCAAGTCTGAGAAAAGGCCGGTGCTTGTTGTGTTGTGGCTTGTTAACTCTACAATAAT  
ATATCATCATCAACTTTTTTCATTCTTAGGTTTGTGTTTGTGGAGAAGCTAGTGCTATTTCTCCAAT  
TTTAGTTCCCTATCCTCTCCGCGATTAATTACT

>Glyma.17G031900

TATTA A A A A A A A A A A G A A G C C T A C T T G A T T A G A T A G A T A A G A C A T A T C A T A T T C A T A T T T C A A A A G A  
G G C C A T G A T A T C A A T T T G A T A T T T T C A T A T C C C G T T A T T T T T A T T A A A T C A A C T C A T A A A A C A A A T  
A T G T G C A G A A A T C A T G T T A T G C T T T A C A G G A G T G A C A A A A T C G G A T C A C T T C A T T G G G C C A A T C T  
T T T T A C T T T T G T T T T T T T T T T T T T T T T A G T T T T G A G T T C T T T A A T T T A T C G A C C C A T T T C T C C T C A T C C C A C T  
T A A T T C G C T A A A A A T A A T T G A G A A C G A C A T A A A G G T C G G T T A A T T T G T C A A C T A T T T T T T T C A G A  
A A A T A T T T A G T A T G T G G A A A T T T T T A A G T A T T T C T C T C A A A T T T T A T T T A T T A T A A C T T A T A A A T T T  
A T A T A T G A A G T T C T T T A A T T T T G A T A T A T A A C T A T T A T C C A T C A A T T G G A A A T T A T T T T A A G T T C C T  
T T T T T A A G T T T C T T T T A T T A A A A A A A T T G A G T A T T T A T T T A A T A A T A T A T A T A T A T A T A T A T G T  
A T A T A T A A T T T A C A A A T C A T C A C T A G A A T A A T T T A A T A T T A A A A T A T T T T T T G A G G T T G G T A A G A A  
A A A T A G A A A T T C T T G T T T G A G A A T A A C C T A G C A C C T T A T T T T A T A T A C C A A C A A A A A A T T T A  
C A A C T A A A A A A A G A T T G T G A C T T T G A A T A C T T T C A C T A A C A A A A A C T A A A A A A T T A A C A C T A A T  
C T T A A A A A A A A A A A C T A A A A A A A A G T C A A C T T A T C A A A T A A G A T A A A A A A A T A A T A T A A A T T  
T A A G A T A A A A G A A A A T T A T T A T T C T T C A C T T C A C T A C G T A T G A A A A A T A A A A T T C A T G A T T A T T T  
C C T C A T T A C C A T A T A T G T T A C C G T A A A A T G T G A G T T A A A A G C A T A A A T A T A A G A T G C T A T T A C A A  
T A T T T T T T A G A T A T T T T A T T A A A T T T C T T A G T T T C T A A G A A G A G A A A T A T A A T A A A A A T A T A  
A T T A T T A T T A T T T A C A T A A T C C A A T A A G A A A C T A A A T A A T T T T T T T A G A A T T T C T C A A A T A G C A A  
A A T A A T A A A A T A A A A T T G G A A A A T G T G T A A C T A A C T T A A G T T G A T T T T T T A C T T G T T T A T T T T T T  
G A G T A A A G C T T A A A G C T T T G T T T A A C A T G A C A T T T C A G T G A A A A G A A A A T A T T T G T T T T T C T T T T  
C T A G C T T G G T A T T A A C A T A A A A A T G A G A A G G A C A T A T T A A A G A T A T C A T T T C A T T A C T T A A A T G G  
T T T A A C A A A A A A T A A T A T A T A T A T A T A T A T A T A T A T A T A T A T A T A T A T A T A T A T A T A T A T A T A T T A  
T G A T T C T A T A A T T A T T A A A A A A A T T T T C A A A A C T A A A A A T T A G T C T T A T A C T T T T T C T A A T A T T  
T T T A A T T T G T T A A T G T G T T A A A T G T T T T T T A T C T T T T T G T T T T T G T T T T T T T A T T T T T C C T G A T  
A A T A T G A A T T T T A A T T T T C T T A A T T A T A T T A A C T A A A A C T A G T A T G A T A A A A T A T T T T T A T T T A A T  
T A A A A T T A A T T T A T T A G A A A A G T T G A A A T A T A T T T G A A A T T T G A T T A G A A T T T A A T T C T T A T A T T A  
T A A T A A T T T A T A T T A T C A T T T A A T T A T A A A A T A T T A T T A T A T G A C T T T T A A A A T A A T T A T T A T A A  
A A G T T A A T T A A T T T A T T T A T T T T A T T A A A A C C C A C T A A T A C C A A C C T A A T G G T A A A G T T G G C A T A  
A T G C G C G T G G T T G T A T C A C T T G T A T G T T A T T T T C C G T A A C A G C C A C G G T A A A A T A A A A A A G C C A  
C T G T A A A A T A A A C T A T T T T C C T T G G A T A A G T A T T T T A G T C T T G A A A A C A T T T T G G T T A A C T C T T G  
T C T T C T T T T T C G T C T T G A A A C A A C C T T T T G T C T T C A T C T A T T A T T T A T T T A T T C G A A T T A G T A T T

TTAATCGTACTTAGCTTCTTCTTTTTTTACACAAAAGCTCTTATTTTATTTATTTTATAACTTATACT  
GTAAGTGTAAATAATTTAACGCATAAGAGTCAGACTGTAGAATAGAAAACAGAAAGGAACAGG  
AAAGAGTGTCAATTCAGCTCCAACGAGGCGATCATATTTCTCTGCAATCCGAACAGACCCACCCTT  
CTCTGCAATTAGGTAAATTTACCACCTTTTCTATTTTTTCTCACTACTCTTCTAATTTTTCCACCCTGT  
TTTTTATTTTATTTTTAGTTGAGAACGATGTTTTTTTCTTTTATCGAGTCACCACCTTTGCTCTTTTTTT  
CATTTTTCATGTAATATGCAGTTGCTGAGTTTTAGGTGAGAGAAAAGTGTTCCGGAATTTCCCAAGG  
TTTCTGTGAAT

>Glyma.07G242000

GAAAAGAGATTAAAAATATTTTTTTATAAAAATACAATAACTGAATTGGATGGTATTAATTTGGA  
GTACTAAAATTAAGATTTTTATGGAAATATAAGAAGTAAACATATTTTTTTTCTTCTTTTAATCA  
TCACTCGCTTCTTAAAATCATTTTTATTTAAGTACTCTTTGAGTTAATTTTTATCCTCCAAAGCTC  
AGGCACATATCCTTACCTATAATGTCAAAGTGTTTTGCAAGAAACAACAATAGATATATACTTAG  
ATAGTACATGTACACATTTTCTTTCGGTGGCCACGAGAAGCCGCCAAATGAATTTAGACTAGTGA  
GCACTACAAATTTGACCCAAGTGTTTTTTTTTATCCTTAAAAAACATTATAATAATTAAGTAGAT  
ATTATTTATAATTTTCATTTCTTTAATTTTAAAAATATTTTAGAGAAGATAAAAAATATGGAATA  
AGGACAGATTGAAGAACTTGGACTGGAAAGAAAGAAAGTAAGACAAAAAGAGAAAGGA  
TAAAGAAGAAGAAAGACACCCATAGTATCATTGATTCATCAAATAAGGTATTTAAGTTTATTT  
TTAACCTTTTTTACTAGTTAAAAGATTTGATAAATAATTTTTTTAATAATTTCTAATTTTTTTGGA  
GTATTGTTTTTAAAAACATTTGCTTTTATCTTTAATTTTTAATATTTTATTTTATTTTATCTTCAATT  
TATTTATTTTATTTTCGTATTATTTTTTAAAAATAAATTATAATTTTATTATTTTTTTTTGTCATTTTAT  
ACTTTTGAATTATTTCAACGATTAATTTTATCAAACACTTATAATTTAATAAATTAATTTTTTAGTT  
TTAAAGATTAGTCAATCATAGCATAAGCAAAAAAGGATAAAAAGAAGAAAACAAAATAATAAA  
CATGAGATATTTTTTAAAGTTATTTGGTAAGAAAAATAAAAAATTATTGTTTGGCATAAACCTAAC  
ACCTTATTTTTACATATACTCAACGAAAATTTTACAACCTGAAAAAATACAACCTTATCAATTAAG  
CTAAAAATAAAAGTAACCTAAAATTTAAGATAAAAAAGAAATTTACTATTCTTAACTTCATCTAC  
GTATGAAAAACAAAATTCACGATTATTTCACTCATCTATGATTTATGTTACTGTAAAATATGAGTT  
GAACATAAATATGATGCTATTAATATATTTTCTTAGATATGTTTATTAATTTCTTAGATTTTGAAA  
ATAGAGAAATATAATCAAATATCATTATTCTTATTTAACATAATCTCATAAGATACTAAATTA  
AATATTAATTTTGTAGTACTTCAAACAGAAAAATAATAAAATAAAATTGGAAAATATGTAAT  
TAACTTTAATTGATTTTTTTACTTATTTTTTTAATAAAGTTTATAAGCTTTGTTTAAACATGACATTTT  
AGTAAAATATTTTTTCTTTCTTTTTCTAGCTTGATTAATATGAAAATGAAAAGGAGATATTG  
AAGATATCATTTCACTTTTAAATTTTTTAAAAATAAAATATAATATATATTATGATTTTATAAATA  
TTAATATAAATAAAAAATAAAAAATATTTCAAACCTAAAAATTAATCTTATAACATTTTAAAAATATT  
TTTATTTATGACTGGATGGGCGTGGTAAAGTTAATCTTATATATGGATTAAATAACATTTAATGTA  
TTTTGTAAATATTTGAGGATTTTATCATAATGAATATTTTTTGTATTAAACTCACTAATATCAA  
CCTAGTGGTAATGTTGGGATAAATGCGCGTGGTTGTATGGTTATTTTTTCATTACAGCCATTGTAAA  
AGAAAATAATTTTCTTGGATAAGTAGTTTTACTCTCGTAAAACAACCTTTTGTCTTCATCTATTAA  
TTTATTTTATTCGTAGTATTTAATCGTACTTAGTTCTTATTTTATTTATTTATAACTTATAATTTTATA  
ATACTATAATAGTGTAAGAGTCAGACTGTAGAATAGAAAACAGAAAGGAACAAGAAAGAGTGT  
CATTCAGCTCCAACGAGGCGATCATATTTCTATCGGTTCCAATACGAACAGACCCACCCTTCTCT  
GCAATTAGGTAAACTTACCACCTTTTCTATTTTTTCTCACTACCCTTTTAGTTTCTCATCTGTTTC  
TGATTTCTTTTAGTTGAGAACGATGATTGTTTTCTTTTATTGAGTCGTCACCTTTGCTCTTGTTCATTT

TTCATGTAATACGCACTTGCTGAGTTTTAGGTGGGAGAAAAGTTTTTCGGAATTTCCGAAGGTTTCT  
GTGAAT

>Glyma.11G251900

CCAAACTCAAGGCACCTTGAGCGTCCAGGTA CTTGAAAAAGCAAGCCAGGCATTAACAACACG  
AATAGCACCACAGCCACAACCACAGGCCACAGTCCAACATTATTAATCTATTCTTCCAATTTAT  
TAATGTGTATTGATAAGTAAGAAAGAACACACAGAGAGTCCTTGTTGTGCTATTCAGAGAAAAT  
ATGTA CTGCTATATATACTATGTATTAGGAAGGTGTCGTGCATGGGTGGAGGCCCTCGGTGATT  
AAGCTACGTTTGGATTCACCGCCACTGTGCACGTGGTGTCTTGTTGTTT CAGATTTGGATTAAGGATA  
ACTTGCTTCACATCATAATTCTAACTATTATCCATGTGCTTCACCTTTCACCGTTTATTTTCATGCTC  
AAGCAAGGAATTATATTAGTTATAGAGCCAGACAGACACTACTCATGTTTAGAAAATTCGGAACTT  
AATTAATAATTGGCTTGGTTTCATGTTCCATACTTCATAAAATCTTCTTAAAGGAACTCCACTCATC  
AGCTATATAGCAAGGATGACA ACTTCCACAATCATTCACTTGTATT CATAAAAAAATATCTACAA  
TGACTAGAATGATTTTTTTTAGGGAAACAAATGCTGTACTATTTTTTTTATATAAAAAATGTCAGG  
GAATTTCTTGCAAATCGATTTGATACAAAAATATTTATTTTTTAAAGTAAAAAATATTTTTCAA  
CTGTAAAAATATACTCCTATATTTAAAGAATAAAAATACACAATTTAAAAGATTGAGAATTTCACT  
CTCCTAAGTTTCATAATTA AAAACATTTTTTATATTCTTGATCTCTTTCATATCTCTTTTGAATGCCA  
ATTCACGCATTATCTCTCCAATCACCAAAAAAAAATTGTATAATATTACATCACTTAAATAATTG  
AAACTTGTGCAAAACTAGCATTGAAAGTTTAGTGAAGTTTTCTTTTTGCTGAATGTAAAGTTTAGT  
CAAGTTGATCACTAAGGTGGCAGCGAACCAGGAACATAGTAGACTCGTTCGAGTTTGGGCCTTCC  
AAGAAAAAATGTTGTGATGAATATTGGGCTGGAAAAAAAAGAATTTAAATCCACTTCAGTAACT  
TAACACAGCCTTCGAAGAAAAAAGTTGTAATGAATCTAATTGTTTTTAAAATAAAACTTATTA  
TTTATTTTAAATTTAATTATATATAAATAAATTTGTTACATATGATCCCTACTTAAAAGTTGCTTGAT  
TATGGTTGTAATCCCTAATCCCTAAACTGTTACCATTACATTATTACATAGTTCAGCCATATGAA  
GTTATGAACAGAAATTGTA ACTATTCAAGAAGACTTCATCAATAGACTTCTGAATACACGATCTC  
TAACTTCATTCTTTTGAGCGTTTAAATTTCTGTATTTTGTGCGGTATCAAAGAGTATAGTAGCTAT  
AGGGGAGAAATTCAAAAACCAAAGAAAATGATGCATGTTAGGTCTACTCAAGTACCAAGAGAG  
TGACATTTGCGACTTATTCCCAGTCAGGTCATGCTTTTTCTTACTGATTCACGTTACTCACGAGTTCT  
CTTCAGGTCACCACCACCAATATTCATTTGTTACACTTTCAAGTCTTACTCACTGCAACTGAAT  
TGCTACACAATAATTAAGGTTGTGTTGATTTAGGATGAGAGAAAAAAAAGA ACTTTTATACTTTT  
TATATGGAATTCATACTTTTATTACTTTTAAAGTTAAAAGAAATCTTCTATTTCTATTCTTTTTAT  
CTTCTAAATCAAACATATCCTTAACTTTCTTCAAAGGGAGTCGAACGAAATTCCTCCGCGAGA  
CATATCTTATCCATAATTCTCTAACTTTGGTACAATTTATCCAAGAAATTCGTCGTTAGATGTCTCC  
GACACTTTCAATTTACATTACATATAACCACCCTGTTTACTTATTGTTACATACTTAGATGTCAA  
AAATATTTTTAAAATTAAGAAATATAACAAAAGCTTATCCATAAAATTTCAAACAATAATTAC  
AATACATTGGCATTATAAATATTCACTTATACTACCATCGATCTAATCCGCCTCGAGCAAATAAGT  
TCATGGACACAATTGTTGTCCTTCCCTACCCACATGGAGGAATAATTGATTGGATTTCTATAGTTTC  
AGATATAGAAAAGACGATTATTATTAAGTTCTTACTTCTTAGTGTGTGTGTTGGGCACCATTAAGTT  
CTGCATGATTC AAGACTGACGTGAGCAAGAAACAATAAGATGAGTTCTGAATTCTTGGGCTAAT  
TTGACATTGTC

>Glyma.08G105200

GAGTTTGTATAGTTCTTTGGCTTGTATAGAAAATTTATTATTGTTGTTTCATGAAGGTAGTTATAT  
TATGTTATATTTCTTTGTTGTTAATAATATCGAATGTCTTGTGTTTTTAATAATGTCTTCATATAAG



ATTTTGTAAGTAATGTGATATTACAATGAAAATAATATTTTTAAATATTTTAATTTAAAATTATTAT  
ATTTTTTTTTATAAATTGGTTCTAGTTGATTTATTCTAAAAACAAATAAAAATATTATTTTTTTGTTGC  
AAGAAAACAACAACGATTGATCTATAATTGATGTAGAAAAGTATTTTTATACATTTTTTACATTAAT  
TTTTTCAAAAAGCAATATTGTATAAGACTTTTTAAAATTGATTTTTTCAAACCTGATATAGAAAAGTA  
CTTCATAATACATGATTCAACATTGATTTTTTCAAAAATCAATATTGTACAAAAAACAATATCA  
ATTTTGTGGAAATTGATGTTGAATTTTTGCATATTTTACATTTTTTTTTCTTTTTCTTATAATACAAT  
ATTAGTTTTCTTAAAAATCGATATTATAAAGTGTATTTTAGCATCGATTTTCATAATTGATGTTAAC  
ATTGATACTTTTAATGTTTATAATTTCAACATCGATTTAAAACCTGATGAATGTATAAAAATAATTA  
TGTTAAAACATTTTTTTCAATAATAGTGACTTTGAAATTGTTTGTGGTAAATGCGGATGAAGTC  
AATGCCATATTTATATATTGAAAGTCAATATCACTATATCAACTCAAACGCCTACTACTTCTAATA  
AATCTTCATCAACCTAGAATTAATCCTCAACTTCAAGTCTCGTTCACACCGAGCAAGCTTGCTTT  
TTGTGTTAATAATGACCAGGTCTTCCTTTATGATGATATCATTGCTATGCAGATCAGCGAGATAT  
TCAGCCCAGTAACCTCATTACAGTTTTACTCTACATTTTATATTTGACATTCGTTTTTATTAATAT  
TATAATTAAGTTGACCTAAATGTACATGTATATGTATATATAATAAGAAAAATGTGAATTTCT  
AGAGGGAAGTATTTTCTTTTGCTCACATTTGAACCACAATCGTAGTGGTAAACAACCTGTGTTGG  
GAATTAGATTTTCACTACCAATAAAAACAAAACATTTTCACTCGGTTTTACTTCTGTAACAAAA  
AAAAAGTCCGTTTTACAATTTAATCATTAGTTTGTGGCGACATTTCCGTGCGCAATAATTATATGA  
GCGGCATTTTCTAAATTTGTAATAAAAGTTTACTTTTCAATTTGTATCCACGTAATAATTTTTATA  
TTGATTAACCTTTTGATTTATTGATCATCCACTCAATAATGAATGTGTTTCGCCTTGCATATCGCTTA  
AAAACACCTTGGCTCATTATACATTAATATTTTACTAAGATAAAAAATGAAAATATTTAAAAT  
AAATACAAATATAATCGAAGAGTAGAATTATTTATAATATTCTTTTTTATCTTTATTCGCGCAATC  
GAATATTTATTTAGTCTTTTGATATTTCTTTAATTATTTAAGAGGGTAGTTAGCAAAGTTAACAAA  
AAGTAAATTTTGTGTATAATACTGCTACATATTTATTAAGTTAACAAAAAGTTAAAAGGACTAC  
CTGATTATGATTACCGCTTAGAAAAAATCAAACCTTGCTCCAACCTGCAAAGTCTTTTTTTAATCA  
GTGTAAAGTCTTTCCACATAGATACTGAATATTCTAAAAATAAATTAAGAGGGTGAAGAAAAGC  
AAGACATATAGTAGTAGCAATCTAATAGTAAATAGTAATATCTCTTGGTCTTGGTCTTGGTCTTGG  
TCTTGGTCATGGTCTCCATATAGTATTGTATATATAAAAAAATTTGTTTAATAAAAAGCACGTT  
TCGCAAACCTCAACCTTAATCACAACCTCAAATCAACTCTGTAATAAGCTTCAACTAACGCTAAC  
TGTGTCTGTTTCAGCTTTCTGCTTTTGCAACTTCTTTCTCCGGTCCATTGTTTGCAGCGAATCTAGC  
AGCCTCTGCGGTTCCAAAAATGCTCTGTGTCCGGTCTACTACCTGTACTTGTAGCTTTTTATTCT  
CGGATTCAACACC

## Alignment of Arabidopsis and Soybean CAMTA family protein sequences

```

      . . . . | . . . . | . . . . | . . . . | . . . . | . . . . | . . . . | . . . . |
      10      20      30      40      50      60      70
AtCAMTA1  MARKKKSVSF  SHLDIARNEG  NKIISFSVHA  YSDRLGFVDS  LFDYESLRSL  LVDFWVYPSM  VDRRSFGSIT
AtCAMTA2  -----M  ADRGSFG-FA
AtCAMTA3  -----M  AEARRFSPVH
AtCAMTA4  -----M  SSVVAEDNSFT  CDIATIFVAI  CRNPPANPSD
AtCAMTA5  -----M  MAGVDSGK-  LIGSEIHGFH
AtCAMTA6  -----M  MDGDGLGR-  LIGSEIHGFH
GmCAMTA1  -----M  AEARHYVPPS
GmCAMTA2  -----M  AEARLYAPPS
GmCAMTA3  -----M  AEGASYG-LR
GmCAMTA4  -----M  SERSSFGLG
GmCAMTA5  -----M  AERSCFGLG
GmCAMTA6  -----M  AEGASYG-LR
GmCAMTA7  -----M  AETTKYIPNS
GmCAMTA8  -----M  MMSHNLTGQ-  LVGAEIHGFH
GmCAMTA9  -----M  MMSHNLTGQ-  LVGAEIHGFH
GmCAMTA10 -----M
GmCAMTA11 -----M
GmCAMTA12 -----M  MANNLAAQQ  LVGSEIHGFH
GmCAMTA13 -----M  MANNLAVQ-  LVGSEMHGPH
GmCAMTA14 -----M
GmCAMTA15 -----M  MT
Clustal Co

```

```

      . . . . | . . . . | . . . . | . . . . | . . . . | . . . . | . . . . | . . . . |
      80      90      100     110     120     130     140
AtCAMTA1  PPLQLDMEQL  LSEAQHRWLR  PTEICEILQN  YHKFHIASES  PTRPASGSLF  LFDRKVLRYF  RKDGHNWRKK
AtCAMTA2  P--RLDIKQL  LSEAQHRWLR  PAEICEILRN  HQKFHIASEP  PNRPPSGSLF  LFDRKVLRYF  RKDGHNWRKK
AtCAMTA3  E---LDVGGI  LSEARHRWLR  PPEICEILQN  YQRFQISTEP  PTPSSGSVF  MFDRKVLRYF  RKDGHNWRKK
AtCAMTA4  SLFQYEISTL  YQEAHSRWLW  PPEVLFILRN  HESLTLTNTA  PQRPTSGSLL  LFNKRVLKFF  RKDGHQWRKK
AtCAMTA5  TLQDLDIQTM  LDEAYSRWLR  PNEIHALLCN  HKFFTINVKP  VNLPKSGTIV  LFDRKMLRNF  RKDGHNWKKK
AtCAMTA6  TLQDLDVQTM  LEEAKSRWLR  PNEIHAILYN  PKYFTINVKP  VNLPSNGRII  LFDRKMLRNF  RKDGHNWKKK
GmCAMTA1  Q---LDIKQI  ILEAQHRWLR  PAEICAILSN  HKKFLIASEP  AHMPPSGSLF  LFDRKVLRYF  RKDGHNWRKK
GmCAMTA2  Q---LDIKQI  ILEAQHRWLR  PAEICAILGN  YKFFRIAPEP  AHMPPSGSLF  LFDRKVLRFH  RKDGHNWRKK
GmCAMTA3  R--PLDIQQL  QFEAQHRWLR  PAEICEILRN  YRMFHITSEP  HNRPPSGSLF  LFDRKVLRYF  RKDGHNWRKK
GmCAMTA4  P--RLDLQQL  QLEAQHRWLR  PAEICEILRN  YRMFQITSEP  PNRPPSGSLF  LFDRKVLRYF  RKDGHNWRKK
GmCAMTA5  P--RLDLQQL  QLEAQHRWLR  PAEICEILRN  YQMFQITSEP  PNGPPSGSLF  LFDRKVLRYF  RKDGHNWRKK
GmCAMTA6  R--SLDIQQL  QFEAQHRWLR  PAEICEILRN  YEMFHTITSEP  HNRPPSGSLF  LFDRKVLRYF  RKDGHNWRKK
GmCAMTA7  Q---LELEEI  LNEAEHRWLR  PAEICEILRN  HKKFKLTPDP  PVMPPAGSLF  LFDRKALRYF  RKDGHNRWKK
GmCAMTA8  TLEDLDVSNL  MEEAKSRWLR  PNEIHALLCN  HKYFKINVKP  VNLPKSGTIV  LFDRKMLRNF  RKDGHNWKKK
GmCAMTA9  TLDDLDVSNL  MEEAKSRWLR  PNEIHAILCN  HKYFKINAKP  VNLPKSGTIV  LFDRKMLRNF  RKDGHNWKKK
GmCAMTA10 PGYEYDINDL  HQEAQARWLK  PAEVMYILQN  HEKFQFTQEP  PQQPTSGSLF  LFNKRVLRF  RKDGHNWRKK
GmCAMTA11 AGLEYSIDDL  FQEAKRRLW  PVEALYILRN  HDQCKFTHQP  PHQPAGGSLF  LFNRRIMRSF  RKDGHNWRKK
GmCAMTA12 TLQDLDVGSI  MEEARTRWLR  PNEIHAMLCN  YKYFTINVKP  VNLPKSGTIV  LFDRKMLRNF  RKDGHNWKKK
GmCAMTA13 TLQDLDVGSI  MEEARTRWLR  PNEIHAMLCN  YKYFTINVKP  VNLPKSGTIV  LFDRKMLRNF  RKDGHNWKKK
GmCAMTA14 AGLEYSIDDL  FQEAKRRLW  PVEALYILRN  HDQCKFTHQP  PHQPAGGSLF  LFNRRIMRSF  RKDGHNWRKK
GmCAMTA15 PGYEYDINDL  HQEAQARWLK  PAEVMYILQN  HEKFQFTQEV  PQQPTSGSLF  LFNKRILRYF  RRDGHNWKKK
Clustal Co  .:      **  ***:  * *  : * *      :      * . * :.  : * * : * : * : *

```

```

      . . . . | . . . . | . . . . | . . . . | . . . . | . . . . | . . . . | . . . . |
      150     160     170     180     190     200     210
AtCAMTA1  KDGKTIREAH  EKLKVGSDIV  LHCYYAHGEA  NENFQRRCYW  MLEQYYRKA  SSHWVLVATL  SLFSFGYLRP
AtCAMTA2  KDGKTVKEAH  EKLKVGSDIV  LHCYYAHGED  NENFQRRCYW  MLEQ-----  -----
AtCAMTA3  KDGKTVKEAH  ERLKAGSDIV  LHCYYAHQD  NENFQRRSYW  LLQE-----  -----
AtCAMTA4  RDGRAIAEAH  ERLKVGNAEA  LNCYYAHGEQ  DPTFRRRIYW  MLDP-----  -----
AtCAMTA5  KDGKTIKEAH  EHLKVGNEER  IHVYYAHGED  TPTFVRCYW  LLDK-----  -----
AtCAMTA6  KDGRTVKEAH  EHLKVGNEER  IHVYYAHGED  NTFVRCYW  LLDK-----  -----
GmCAMTA1  KDGKTVREAH  ERLKAGSDIV  LHCYYAHGEE  NENFRRRYW  LLEE-----  -----
GmCAMTA2  KDGKTVREAH  ERLKAGSDIV  LHCYYAHGEE  NENFQRRTYW  LLEE-----  -----
GmCAMTA3  KDGKTVKEAH  EKLKVGSDIV  LHCYYAHGEE  NENFQRRSYW  MLEP-----  -----
GmCAMTA4  KDGKTVKEAH  EKLKVGSDIV  LHCYYAHGEE  NENFQRRSYW  MLEL-----  -----
GmCAMTA5  KDGKTVKEAH  EKLKVGSDIV  LHCYYAHGEE  NENFQRRSYW  MLEP-----  -----
GmCAMTA6  KDGKTVKEAH  EKLKIGSDIV  LHCYYAHGEE  NENFQRRSYW  MLEP-----  -----
GmCAMTA7  KDGKTVREAH  EKLKAGSDIV  LHCYYAHGED  NEYFQRRSYW  MLDE-----  -----

```

```

GmCAMTA8 TDGKTVKEAH EHLKVGNEER IHVYYAHGQD NPTFVRRCYW LLDK-----
GmCAMTA9 TDGKTVKEAH EHLKVGNEER IHVYYAHGQD KPTFVRRCYW LLDK-----
GmCAMTA10 RDGRTVGEAH ERLKVGNEEA LNCYYAHGEQ NPTFQRRSYW MLDP-----
GmCAMTA11 KDGKTVGEAH ERLKVGNEEI LNCYYAHGEE NRTFQRRSYW MLEP-----
GmCAMTA12 KDGKTVKEAH EHLKVGNEER IHVYYAHGQD NPNFVRRCYW LLDK-----
GmCAMTA13 KDGKTVKEAH EHLKVGNEER IHVYYAHGQD NPNFVRRCYW LLDK-----
GmCAMTA14 KDGKTVGEAH ERLKVGNEEI LNCYYAHGEE NRTFQRRSYW MLEP-----
GmCAMTA15 SGGRTVGEAH ERLKVLNVEA LNCYYARGEQ NPAFQRRSYW MLDP-----
Clustal Co  .*:::  **  *.*  . :  ::  ***:*  *  **  **  :*

```

```

....|....| ....|....| ....|....| ....|....| ....|....| ....|....| ....|....|
          220          230          240          250          260          270          280
AtCAMTA1 SWVRHLMHIV FVHYLEVKGN RTS----- --IG-MK ENNSNSVNGT ASVNIDS---
AtCAMTA2 ----DLMHIV FVHYLEVKGN RMS----- --TSGTK ENHSNSLSGT GSVNVDS---
AtCAMTA3 ----ELSHIV FVHYLEVKGK RVSTSFNRMQ RTEDAARSPQ ETGDALTS-E HDGYASCSEFN QNDHSNHSQT
AtCAMTA4 ----EYEHIV LVHYRDVSER EEGQ----- --QTGG- -QVY QFAPILSTQN VSYNQYIGDS
AtCAMTA5 ----SQEHIV LVHYRETHEV H-----
AtCAMTA6 ----ARENIV LVHYRDTQEA A-----
GmCAMTA1 ----ELSHIV LVHYRHVKGK KAN--FTCAK ENEETLPYAQ QTDKIMPKTE METSLSSTLH PHSYQVPSQT
GmCAMTA2 ----ELSHIV LVHYRQVKGT KAN--FTSAK ENEESLPYAQ QTDKIMPQTE MDTLSSTLH PHSYQVPSKT
GmCAMTA3 ----DMMHIV FVHYLEVKGN K-N----- --IVVNN EGDEVPTDSQ KVTSPSSSLP THHSCVSSL
GmCAMTA4 ----DMMHIV FVHYLDVKVN KTN----- --IGGKT YSDEVTSDSQ KSSSLSSGFP RNYGSMPSGS
GmCAMTA5 ----DMMHIV FVHYLDVKVN KTN----- --VGGKT YSDEVTSDSQ KSSSLSSGFP RNYGSMPSGS
GmCAMTA6 ----DMMHIV FVHYLEVKGN K-N----- --IVVNT EGDEIPSDSQ KVTSSSSSLP THHSSVPSLS
GmCAMTA7 ----QLEHIV LVHYREIKEG CKSG----- --ISHLP VVPVTLVGSS QNTSVLS---
GmCAMTA8 ----NLEHIV LVHYRDTQEL QLQ-----
GmCAMTA9 ----SLEHIV LVHYRDTQEL QLQ-----
GmCAMTA10 ----AYDHIV LVHVRTSEG KLSS----- --GAGA Q LSPSSSVYT QSPSPYSTQN PGSTSILGDS
GmCAMTA11 ----EYDHIV LVHYRETSEG -----
GmCAMTA12 ----SMEHIV LVHYREIQEM Q-----
GmCAMTA13 ----SMEHIV LVHYRETQEM Q-----
GmCAMTA14 ----EYDHIV LVHYRETSEG -----
GmCAMTA15 ----AYEHIV LVHVRTSEG KLSS----- --GAGA Q LSPSS-VYT QSPSPYSTQN PGSTSILGDS
Clustal Co  :**  :***  .

```

```

....|....| ....|....| ....|....| ....|....| ....|....| ....|....| ....|....|
          290          300          310          320          330          340          350
AtCAMTA1 --TASPTSTL SSLCEDADT- -----VIV QG-IVNKQVP -SYDHLNLK LEIAMVGHL-
AtCAMTA2 --TATRSSL SPLCEDADSG DSRQASSLQ QNPEPQTVVP -QIMHHQNAS TINSYNTTS-
AtCAMTA3 TDSASVNGFH SPELEDAESA YNHQSSSTAY SHQELQPAT GGNLTGFDPY YQISLTPRD-
AtCAMTA4 SDIYQQSSST PGVAEVNSN- ----- --LEGSA SSSEFGQALK MLKEQLSIG-
AtCAMTA5 ----- --AAPATP GNSYSSSITD HLESPKIVAE-
AtCAMTA6 ----- --TSGDS ISSPISVSEQ TFPNRVAE-
GmCAMTA1 MD-RSMNSSQ ASEYEEAESA FNNHASSEFY SFLELERPVE KITPQPADSY SPRPLTRKSV PNMNCIIESG
GmCAMTA2 VD-TSMNSAQ TSEYEEAESA FNNHASSEFY SFLELQRPVE KISPQPADFY SPRPLIN-
GmCAMTA3 TDSVSPTTSL MSLHEDADSE DIHHASSGLH PLHESQHSNG SPLTEKIGAG SNSSYLMHP-
GmCAMTA4 TDSMSPTSTL TSLCEDADSE DIHQASSGLH SYRESQNLGN DRPMDKIHR SNSSYLMHP-
GmCAMTA5 TDSMSPTSTL TSLCEDADSE DIHQASSGLH SYRESQNLGN DRPMDKIDAR SNSSYPMHP-
GmCAMTA6 TDSVSPTTSL MSLREDADSE DIHQASSGLR PLYESQHSNG GPLTEKIGAG SNSSYLHP-
GmCAMTA7 ---STKINS P ISLVQTSFTS SANKVYQNGR ASEHEDVNSK NGPQASSHAQ PISNYVLHS-
GmCAMTA8 ----- --GSPATP VNSNSSSASD PAASWIPSE-
GmCAMTA9 ----- --GSPATP VNSNSSSVSD SAASWIPSD-
GmCAMTA10 YEPNQ-SFSS PGSTEVTS DM FVLNNKMGHM DGTDTESGTS PELEVQALR RLEVQLSLN-
GmCAMTA11 ----- --SEVT- ----- --FEAQLR QLEEQSLN-
GmCAMTA12 ----- --GSPVTP VNSHSSSVSD PPAPWILSE-
GmCAMTA13 ----- --GSPVTP VNSHSSSVSD PPAPWILSE-
GmCAMTA14 ----- --SEVT- ----- --FEAQLR QLEEQSLN-
GmCAMTA15 YEPNQ-SFSS PGSTKVTS EI FVLNNKMGHM DWADTESGTS SELEVQALR RLEVQLSLN-
Clustal Co

```

```

....|....| ....|....| ....|....| ....|....| ....|....| ....|....| ....|....|
          360          370          380          390          400          410          420
AtCAMTA1 LLA----- --CVM FHRFMGT- -ESEK -----
AtCAMTA2 VLGNR----- --DGWTS AH GNRVKGS- -NSQR SGDVPADWAS FE-NSLARYQ NLPYNAPLTQ
AtCAMTA3 -SYQRELRTI P-VTDSSIMV D-KSKTINS P GVTNGLKNRK SIDSQTWEEI LG-NCGSG-V EALPLQPNSE
AtCAMTA4 ----- --DEH VNSVDPHYIQ -----
AtCAMTA5 ----- --D TSSGVHNTCN TGFEVRSNSL
AtCAMTA6 ----- --D IDTVVR- -

```

```

GmCAMTA1 TDDQEKSPVI PGVNYISLTQ DNKIKDIHNF GLT--YESPK PLGFSSWEGI LKNNAGSQHV PFQPLFPGTQ
GmCAMTA2 --DQEKLPPI PGVNYISLTQ DNKNKDILNA GLT--YESPK PLGFSSWEGI LENNAGSQHV HFQPLFPGTQ
GmCAMTA3 FSGDNEQSSI SGTDYVPVH GDKFRGND-- --TAYTDGQK PHGMAPWGTV LQ-STAKLHN D-PSLASFPS
GmCAMTA4 FSDNHGQLPV SGAEYIPHVQ GNKSRASD-- --TTYIEGQR AHGIASWDNA ME-QSAGKHA D-PSLVSSSTS
GmCAMTA5 FSGDHGQLPV SGAEYIPVHL GDKSRASD-- --TTYIEGQR AQGIASWDNT ME-QSAGEYA D-PSLVSSSTT
GmCAMTA6 FSGDYEQSSI SGTDYIPVH GDKFRGND-- --TAYTDGQK THDVATWSTV LQ-STAKLHN D-PSLASSPTS
GmCAMTA7 -----APWL THEAAGFS-- -----ELLR NPLISSWPSS FP-----SYS PGTGLSPWTS
GmCAMTA8 -----LDLSDG VNSAYA VELN---DNL
GmCAMTA9 -----LDLSDG VNSAYA VELN---DSL
GmCAMTA10 -----EDN FEDIVSFGSK HETTHDSNPQ HDQRVISNQE
GmCAMTA11 -----DDG FN-----EIALDLVSG QDQRVVYKQD
GmCAMTA12 -----E IDSGTTTAYA GDTS---ANI
GmCAMTA13 -----E IDSGTTTAYT GDMS---NNI
GmCAMTA14 -----DDG FN-----EIALDLVSG QDQRVVYKQD
GmCAMTA15 -----EDN FEDIVSFGSK HETVHDSNPK HDQRVISNQE
Clustal Co

```

```

.....|.....|.....|.....|.....|.....|.....|.....|.....|.....|.....|.....|
          430          440          450          460          470          480          490
AtCAMTA1 MQPSNTDSML VEENSEKGGK LK-----AEH IRNPLQTQFN WQ-----D DDTD
AtCAMTA2 TQPSTFGLIP MEGKTEKGS L-----SEH LRNPLQSQVN WQTPVQES-- -VPLQKWPMD SHSGMTDATD
AtCAMTA3 -----HEVLDQI LESSFTMQ-- -----DFA SLQES-----
AtCAMTA4 PTTVYQRPEN NKLERCYGGN FGAQYSAKND SNKLERCYGG YVGG-----AEYH
AtCAMTA5 GSRNHEIRLH EINTLDWDEL LVPADISNQS HPTEDMLYF TEQL-----
AtCAMTA6 ---NHDISLH DINTLDWDEL LVPTDLNQS APTVDNLSYF TEPL-----
GmCAMTA1 PDNMGINSKF SQGHEIMVPY LTTSIQKHE NGSLIQAEQN WQA---YDVD SLRMSWPID SAYSGSSCDI
GmCAMTA2 PDNMGINSNF DQGEIFVDPY LTTSIQKHE NGSIIKAEQN WQV---YDVD SLRMSWPID SAYSGSTCEV
GmCAMTA3 ILPSSMGDVL EQEHTIFGDL LMSKSGLTEE AESSQLQSN WQIPFEDNSG GMPMLTQTQS FGLQFRSDYG
GmCAMTA4 IPSSAMGNIL DKNHTVPGNL LGHKIALTEV ERGAQPVQSN WQIPFEDNTG ELPNWGFTQS LGLEFGSDYG
GmCAMTA5 IPSSAVGNIL EENHTVPGKL LGRKNALTEE ERGSQPQSN WQIPFEDNTG ELPNWGFTQS LGLEFGSDYG
GmCAMTA6 IPSSMGDVL EQEHTIFSDL LMSKSGLTEE AESSQLQSN WQIPFEDNSG GMPMLTQTQS FGLQFRSDYG
GmCAMTA7 IQNSSRNTIN MHDGKHHVEA SEADLTVRKL SNAGLDSVHR MQDG-----
GmCAMTA8 TAKSHEQRLH EINTLEWDDL VVPN-VNTST TSNNGNVPYS FQEN-----
GmCAMTA9 TAKSHEQRLH EINTLEWDDL VVSN-ANTST TSNNGNVPYS FQON-----
GmCAMTA10 QSAAFSGP-- DQGLFYDGY NGRQDGGHEF YHELIDHGYP DGNE-----KALW
GmCAMTA11 KSAALSGP-- NDLGQPCDGY NGRQDSDGTY YHDFLDDCPG GNEK-----TIYW
GmCAMTA12 NVKSHELRLH EINTLDWDDL VDANDHNTT VPNGGTVPYF DLQD-----
GmCAMTA13 NVKSHELRLH EINTLEWDDL VDTNDHNTT VPNGGTVPYF DQD-----
GmCAMTA14 KSAALSGP-- NDLGQPCDGY NGRQDSDGTY YHDFLDDCPG GNEK-----TIYW
GmCAMTA15 QSAAFSRP-- DDQGLFYDGC NGRQ-----DHGYP DANE-----KALW
Clustal Co

```

```

.....|.....|.....|.....|.....|.....|.....|.....|.....|.....|.....|.....|
          500          510          520          530          540          550          560
AtCAMTA1 LALFEQSAQD N----FETFS SLLGSENLPQ FGISYQAPPS NMDSEYMP-- -----VMK
AtCAMTA2 LALFGQGAHE N----FGTFS SLLGSQDQQS S--SFQAPFT NNEAAYIPKL GPEDLIY-EA SANQTLPLRK
AtCAMTA3 MVKSQNQELN SG-----LTSR--T VWFQG--QDM ELNAISNLAS NEKAP-----YLSMTKQ
AtCAMTA4 SSNMLVKNG SGPSGGTGGG GDQGSSEWKD VLEACEASIP LNSEGSTPSS AKGLLAGLQE DSNWS--YSN
AtCAMTA5 QTAPRGSVKQ GNHLAGYNGS VDIPSPFPLE DPVYQNNNS- -CGAGEFSSQ HSHCGVDPNL QRRDFSATVT
AtCAMTA6 QNAANGTAEH GN-----ATVA
GmCAMTA1 TCSNREQEVN DVDLQKSLEQ CLLHPYKQNK VFMQNDPQEK LLNEKEKIKS DLEANRILDG IEDTYFTFKR
GmCAMTA2 SCSNCEQEVN DVDLQKSLEQ CLLHSHKQNK VLMQNDLQEK LLNEKEKIKS NLEAY---G IEDTYLSFKR
GmCAMTA3 TGLLGNETRN ASSEIAPILY SFHGEPKEQP MQQNYPQELE DGQSQHALKS NSANKVPDEE TINYGLTVKS
GmCAMTA4 TSLLGDVTNN AGPEIDPELF TFNGELKEQ -----YT HGQSQPALKS NSAYEVPGEA SINYALTMRR
GmCAMTA5 ASLLGDVTNN AGPEIVPELF TFNGELKEQS VHQNFSKLYT HGQSQPALKS NSEYVPGEA SINYALTMRR
GmCAMTA6 TGLLGNETRN ACSESAAILY SFNGEPKEQP MQQNYLQELE DGQSQHALKS NSANKVPDEE TINYGLTVKR
GmCAMTA7 -VIFRDLIT DMCVQPVIDL PTVNQVKNH GLDSFHAQVH DHNDHPVVAT TKILVEQKLQ DGGLYNDESE
GmCAMTA8 QSLLSGRFGN VSS---NPS AEIPSFNLT QVSGSNSAP YSFPDSAILL -----KNSPISGG
GmCAMTA9 QSLLNDSFGN VSS---DPS AEIPSFNLT QVSGSDSAP YSFPESADLL -----KSSPLSSGG
GmCAMTA10 TEVLESCKSS S-----AV KLPQKNVYMP VENLENSVSS ARRVPVSNQE NSHWLNFNSN
GmCAMTA11 TKVLESCKPL S-----VT KLPDQHAYEA IGN-ENTLFS SGRGVIANLE NNQWLNSNSN
GmCAMTA12 QILLNDSFSN VAN---NLS ADIPSFGLT QPIAGNSVP YNFSS-VNLQ TMDDQANPHE QRNNTVSLSG
GmCAMTA13 QILLNDSFSN VAN---NLS AEIPSFNLT QPIAGNSRVP YNFSESVTLQ TMDNQPANPHE QKNNTVSLSG
GmCAMTA14 TKVLESCKPL S-----VT KLPDQHAYEA IGN-ENTLFS SGRGVIANLE NNQWLNSNSN
GmCAMTA15 TEQLESKSS S-----AV KLPQKNVYMP AEN-ENSVSS ARRVPVSNQE NSHWLNFNSN
Clustal Co

```

|                  | 570         | 580        | 590        | 600         | 610        | 620         | 630        |
|------------------|-------------|------------|------------|-------------|------------|-------------|------------|
| <b>AtCAMTA1</b>  | ILRRS---ED  | SLKKVDSFSK | WAIKELGEM- | -----EDLQM  | Q-SSRGDIAW | TTVECET---  | -----AA    |
| <b>AtCAMTA2</b>  | ALLKK---ED  | SLKKVDSFSR | WVSKELGEM- | -----EDLQM  | Q-SSSGGIAW | TSVEECEN--- | -----AA    |
| <b>AtCAMTA3</b>  | HLLHGALGEE  | GLKKMDSFNR | WMSKELGDVG | VIADANESFT  | Q-SSSR-TYW | EEVESED--G  | SNGHNSRRDM |
| <b>AtCAMTA4</b>  | QVDQSTFLLP  | QDLGSFQLPA | SYSALVAPEN | NGEYCGMMED  | GMKIGL---- | -----       | -----P     |
| <b>AtCAMTA5</b>  | DQPGDALLNN  | GYGSQDSFGR | WVNNFISDSP | GSVDDPSLEA  | YVTPGQ---- | -----       | -----DSSTP |
| <b>AtCAMTA6</b>  | DGSLDALLND  | GPQRESFGR  | WMNSFISESN | GSLEDPSFEP  | MVMPRQ---- | -----       | -----DPLAP |
| <b>GmCAMTA1</b>  | TLLDGSPAAE  | GLKKLDSFNQ | WMSKELADV- | -----EESNK  | P-STSG-GYW | DTVESENEVG  | NTTIPSQGH  |
| <b>GmCAMTA2</b>  | TLLDGPPAAE  | GLKKLDSFNQ | WMSKELGDV- | -----EESNK  | P-STSG-GYW | DTVETENEVG  | NTTIPSQGH  |
| <b>GmCAMTA3</b>  | TLLDR---DE  | SLKKVDSFSR | WITKELGEV- | -----ADLNM  | Q-SSPG-ISW | STDECQH---  | -----VI    |
| <b>GmCAMTA4</b>  | GLLDG---EE  | SLKKVDSFSR | WMTKELAGV- | -----DDLHM  | Q-SSPG-ISW | STDECGD---  | -----VI    |
| <b>GmCAMTA5</b>  | GLLDG---EE  | SLKKVDSFSR | WMTKELAGV- | -----DDLHM  | Q-SSPG-ISW | STDECGD---  | -----VI    |
| <b>GmCAMTA6</b>  | TLLDK---DE  | SLKKVDSFSR | WITKELGEV- | -----ADLNM  | Q-SSPG-ISW | STDECQH---  | -----VI    |
| <b>GmCAMTA7</b>  | QVEYG-----  | EMKKLDSFGR | WMDKEIGGD- | -----CDNSLM | A-SDSG-NYW | STLDAHSEDK  | EVSSLRHMQL |
| <b>GmCAMTA8</b>  | VDTLGLTVNE  | GLQSQDSFGT | WMN-IISDTP | CSIDESALKA  | SISSVH---- | -----       | -----VPYSS |
| <b>GmCAMTA9</b>  | VDTLGLTVNE  | GLQSQDSFGT | WMN-IISDTP | CSIDESALEA  | TTSSVH---- | -----       | -----VPYSS |
| <b>GmCAMTA10</b> | NSSENSVFSQP | QGVDEVKFPV | YSSMVETQVI | NSDYETLFD   | QSQIGA---- | -----       | -----P     |
| <b>GmCAMTA11</b> | NIEN-----   | --YGGVKFPP | YS-LAETPGA | NSDYETFFD   | QFQNGQ---- | -----       | -----P     |
| <b>GmCAMTA12</b> | VDSLDTLVND  | RLQSQNSFGM | WVNPIMSDSP | CSVDDPALES  | PVSSVH---- | -----       | -----EPYSS |
| <b>GmCAMTA13</b> | VDSLDTLVND  | RLQSQNSFGM | WVNHIMSDSP | CSVDDPALES  | PVSSIH---- | -----       | -----EPYSS |
| <b>GmCAMTA14</b> | NIEN-----   | --YGGVKFPP | YS-LAETPGA | NSDYETFFD   | QFQNGQ---- | -----       | -----P     |
| <b>GmCAMTA15</b> | NSSENSVFSQP | QGVDEVKFPV | YSSMLETQVI | NSDYETLFD   | QSQIGA---- | -----       | -----P     |

Clustal Co

::

|                  | 640        | 650        | 660        | 670         | 680         | 690        | 700        |
|------------------|------------|------------|------------|-------------|-------------|------------|------------|
| <b>AtCAMTA1</b>  | AGISLSPSLS | EDQRFTIVDF | WPKSAKTDAE | VEVMVIGTFL  | LSPQEVTKYN  | WSCMFGVEEV | PAEILVDGVL |
| <b>AtCAMTA2</b>  | AGSSLSPSLS | EDQRFTMIDF | WPKWTQTDSE | VEVMVIGTFL  | LSPQEVTSYS  | WSCMFGVEEV | PADILVDGVL |
| <b>AtCAMTA3</b>  | DGYVMSPSLS | KEQLFSINDF | SPSWAYVGE  | VVVFVTGKFL  | KTREETEIGE  | WSCMFGQTEV | PADVISINGL |
| <b>AtCAMTA4</b>  | FEQEMRVTGA | HNQKFTIQDI | SPDWGYANET | TKVIIIGSFL  | CDPTES---T  | WSCMFGNAQV | PFEIIKEGVI |
| <b>AtCAMTA5</b>  | PTVFHSHSDI | PEQVFNITDV | SPAWAYASE  | TKILVTGFFH  | DSFQHLGRSN  | LICICGELRV | PAEFLQMGVY |
| <b>AtCAMTA6</b>  | QAVFHSHSNI | PEQVFNITDV | SPAWAYSEK  | TKILVTGFLH  | DSYQHLERSN  | LYCVCGDFCV | PAEYLQAGVY |
| <b>GmCAMTA1</b>  | DTYVLDPSVS | HDQLFSIIDY | SPSWAFEGSE | IKVIIISGRFL | RSQHEAEQGK  | WSCMFGVEEV | PAEIIAKGVL |
| <b>GmCAMTA2</b>  | DTYVLDPSVS | HDQLFSIIDY | SPSWAFEGSE | IKVIIISGEFL | RSQHEAEQCK  | WSCMFGVEEV | PAVIIAKGVL |
| <b>GmCAMTA3</b>  | DDTSLSPSLS | QDQLFSINDF | SPKWAYAESE | IEVLIIGSFL  | KSQPEVTTCN  | WSCMFGVEEV | PAEVLADGIL |
| <b>GmCAMTA4</b>  | DDTSLHLSLS | QDQLFSINDF | SPKWAYAESE | IEVLIVGTFL  | KSQPVVAKCN  | WSCMFGVEEV | PAEVLADGIL |
| <b>GmCAMTA5</b>  | DDTSLNLSLS | QDQLFSINDF | SPKWAYAESE | IEVLIVGTFL  | KSQPVVAKCN  | WSCMFGVEEV | PAEVLADGIL |
| <b>GmCAMTA6</b>  | DDTSLSPSLS | QDQLFSINDF | SPKWAYAESE | IEVLIIGSFL  | KSQPEVTTCN  | WSCMFGVEEI | PAKVLADGIL |
| <b>GmCAMTA7</b>  | DVDSLSPSLS | QEQLFSIHDF | SPDWAYTGV  | TKVLIVGTFL  | GSKKPSSETK  | WGCMFGIEV  | SAEVLADNVI |
| <b>GmCAMTA8</b>  | LVADNLQSSL | PEQVFNLTVE | SPTWASSTEK | TKVLVTGYFH  | NNYENLAKSN  | LLCVCGDVSV | PVEIVQGVY  |
| <b>GmCAMTA9</b>  | LVADNKQSSL | PEQVFNLTVE | SPWASSTEK  | TKVLVTGYFH  | NNYQHLAKSN  | LLCVCGDVSV | PVEIVQGVY  |
| <b>GmCAMTA10</b> | PDANSSLTVA | QKQKFTIKTI | SPEWGYATET | TKVIVVGSLL  | CHPSDS---A  | WACMFGDVEV | PVEIIQDQVI |
| <b>GmCAMTA11</b> | LGVDSSLTVV | QKQKFTIRAV | SPEYCYSTET | IEVLIIGSFL  | CHSDSDS---T | WACMFGDVEV | PAEIIQDQII |
| <b>GmCAMTA12</b> | LIVDSQQSSL | PGQVFTITDV | SPTCVSSTEK | SKVLVTGFFH  | KDYMHLKSN   | LLCVCGDVSV | PAEIVQGVY  |
| <b>GmCAMTA13</b> | LIVDSQESSL | PEQVFTITDV | SPTCVSSTEK | SKVLVTGFFL  | KDYMHLKSN   | LLCVCGDVSV | PAEIVQGVY  |
| <b>GmCAMTA14</b> | LGVDSSLTVA | QKQKFTIRAV | SPEYCYSTET | TKVIIIGSFL  | CHSDSDS---T | WACMFGDVEV | PAEIIQDQII |
| <b>GmCAMTA15</b> | PDANSSLTVA | QKQKFTIKTI | SPEWGYATET | TKVIVVGSFL  | CHPSDS---A  | WACMFGDVEV | PIEIIQDQVI |

Clustal Co

: \* \*.: \* ::: \* : \*: \*: : . : .:

|                  | 710        | 720         | 730        | 740        | 750        | 760        | 770         |
|------------------|------------|-------------|------------|------------|------------|------------|-------------|
| <b>AtCAMTA1</b>  | CCHAPPHTAG | HVPFYVTCNS  | RFACSEVREF | DFLSGS---- | -TQKINATDV | YGTYTNEASL | QLRFEKMLAH  |
| <b>AtCAMTA2</b>  | CCHAPPHEVG | RVPFYITCSN  | RFACSEVREF | DFLPGS---- | -TRKLNATDI | YGANTIETSL | HLRFENLLAL  |
| <b>AtCAMTA3</b>  | QCVAPMHEAG | RVPFYVTCNS  | RLACSEVREF | EYKVAE---- | -SQVFDREAD | DE-STIDILE | -ARFVKLLCS  |
| <b>AtCAMTA4</b>  | RCEAPQCGPG | KVNLCSITSGD | GLLCSEIREF | EYREKPDTC  | PKCSEPQTS  | MSTSPNELIL | LVRFVQTLIS  |
| <b>AtCAMTA5</b>  | RCFLPPQSPG | VVNLVLSVDG  | NKPISQLFSF | EHRVQ----- | FIEKAIPQDD | QLYKWEEFEF | QVRLAHLLEFT |
| <b>AtCAMTA6</b>  | RCIIPPHSPG | MVNLVLSADG  | HKPISQCFRF | EHRVAV---- | VLDKTVPEDN | QDSKWEEFEF | QVRLSHLLEFT |
| <b>GmCAMTA1</b>  | CCHTPPHKAG | RVPFYVTCNS  | RLACSEVREF | DFQVNY---- | -TPEVNTTGE | NRGSTFDTF  | -IRFGELLSL  |
| <b>GmCAMTA2</b>  | CCHTPPHKAG | RVPFYVTCNS  | RLACSEVREF | DFQVHY---- | -TPED-TTGE | NRGSTFDTF  | -IRFGELLSL  |
| <b>GmCAMTA3</b>  | CCQAPCHKVG | RVPFYVTCNS  | RLACSEVREF | DFREGF---- | -ARNVDFADF | Y-ISSTEMLR | HLRLEDFLSL  |
| <b>GmCAMTA4</b>  | CCQAPPHKIG | RVPFYVTCNS  | RFACSEVREF | EYREGF---- | -DRNINFPDF | F-NNSSEMEL | HLRLVGLLSL  |
| <b>GmCAMTA5</b>  | CCQAPPHKIG | RVPFYVTCNS  | RFACSEVREF | EYREGF---- | -DRNIQFADC | F-NNSTEMVL | HLRLVGLLSL  |
| <b>GmCAMTA6</b>  | CCQAPRHKVG | RVPFYVTCNS  | RLACSEVREF | DFREGF---- | -ARNVDFADF | Y-NSS-EILL | HLRLEDFLSL  |
| <b>GmCAMTA7</b>  | RCQTPHLSHG | RVPFYITCSN  | RLACSEVREF | EFDENP---- | -TKFLGPEGI | KISPVEEVR  | QMRLLKLVLD  |
| <b>GmCAMTA8</b>  | RCCVPPHSPG | LVNLVLSFDG  | HKPISQVNVF | EYRTPI---- | LHEPTASMEE | K-YNWNEFRL | QMRLAHLLEFA |
| <b>GmCAMTA9</b>  | RCWVSPHSPG | LVTLYLSFDG  | HKPISQVNVF | EYRTPI---- | LHEPTALIEE | K-YNWDEFRL | QMRLAHLLEFA |
| <b>GmCAMTA10</b> | SCEAPSHLPG | KVTLCSITSGN | RESCSEVREF | EYRDKT-NSC | TQCTQSET-E | ATRSPEELLL | LVRLEQMLLS  |
| <b>GmCAMTA11</b> | CCEAPSNHLG | KVNLCSITSGN | RVPCEMREF  | EFRNKT-TSC | TRCNLET-E  | GSKSPEDLLL | LVRFAEMLLS  |
| <b>GmCAMTA12</b> | RCWVSPHSPG | FVNLVMSIDG  | HKPISQVNVF | EYRTPA---- | LHDPVSMEE  | S-DNWDEFQL | QMRLAYLLEF  |

```

GmCAMTA13 RCVWSPHSPG FVNLYLSIDG HKPISQVVF EYRTPA---- LHDPVSMEE S-DNWDFRQ QMRLAYLLFA
GmCAMTA14 CCEAPSNHLG KVNLCITSGN RVPCSEMREF EFRNKT-TSC TRCNSET-E GSKSPEDLLL LVRFAEMLLS
GmCAMTA15 SCEAPSHLPG KVTLCITSGN WESCSEVREF EYHDKT-NSC TRCTQSET-E ATRSPHEELL LVRLGQMLLS
Clustal Co * . * * : : . . * : * :

```

```

      . . . . | . . . . | . . . . | . . . . | . . . . | . . . . | . . . . | . . . . |
      780      790      800      810      820      830      840
AtCAMTA1  RDFVHEHHIF EDVGDKRRQI SKIMLLK--E EKEYLLPG-- TYQRDSTKQE PKGQLFRELF EEELYIWLIIH
AtCAMTA2  RCSVQEHHIF ENVGEKRRKI SKIMLLK--D EKEPPLPG-- TIEKDLTELE AKERLIREEF EDKLYLWLIH
AtCAMTA3  -KSENTSPVS GNDSLSQLS EKISLLLFEN DDQLDQMLMN ----EISQEN MKNNLLQEFL KESLHSWLLQ
AtCAMTA4  DRSSERKSNL ESGND----- -KLLTKLKAD DDQWRHVIGT IIDGSASSTS TVDWLLQELL KDKLDTWLLS
AtCAMTA5  SSNKISVLTS KISPENLEA KKLASRTSHL LNSWAYLMKS IQANEVFFDQ ARDHLFELTL KNRLKEWLE
AtCAMTA6  SSNKLNVLSS KISPHNLRDA KKLASKTNHL LNSWAYLVKS IQGNKVSFQD AKDHLFELS KNRLKEWLE
GmCAMTA1  GHAFPNQSDS ISVSEKSQLR SKINSLLED EDDWDKLLKL TQEDDFSPEN LQEQLLQNL KDKLHAWLLQ
GmCAMTA2  GHAFPNQSDS ISVSEKSQLR SKINSLLED EDDWDKLLKL TQEKDFSPEN LQEQLLQNL KDKLHAWLLQ
GmCAMTA3  KPVDPSNHFS EGDMEKRNLI FKLISLR--E EEDYSIKDEV TRELDISQHM VKEHLFHRQF KEKLYSWLLH
GmCAMTA4  NSMHTLNQVF EGDMDKRNLI FKLISLR--E EEEYSSKEET TAEMDISQOQ LKEHMFHKQV KEKLYSWLLH
GmCAMTA5  NSVRTSNQVF EGDMDKRNLI FKLISLR--E EEEYSSKEET TAEMDISQOQ LKEHMFHKQV KEKLYSWLLH
GmCAMTA6  KPVDPSNHFS EGDMEKRNLI FKLISLR--E EEEYSSKEET TAEMDISQOQ LKEHMFHKQV KEKLYSWLLH
GmCAMTA7  GPDNKWLKCS VSECEKCKLK GTMYSVR--- -DSDGVFEET FQIDGIGHIN HRDILFQRLV RDKLYEWLIY
GmCAMTA8  SDTSLNIFSS KVSFNALKEA RRFSEKTSYI SKSWQYLMKS IDDNTPFSK VKDSLFTAL KNKLKEWLE
GmCAMTA9  SDKSLNIFSS KVTNALKEA RRFSEKTSYI SKSWQYLMKS IDDKTIPFSQ VKDALFETSL KNKLKEWLE
GmCAMTA10 -ASTIKNDNI ESGI----- -PLIK-QKAD DDSWSHIIEA LLVSGTSTG TVDWLLEELL KDKLQWLLS
GmCAMTA11 -SSTTKDDRI ESGS----- -HLSTEQKDD DDSWSHIIDT LLDSTRTPSD AVKWLLEELL KDKLQWLLS
GmCAMTA12 KQLNLDVIST KVSFNRLKEA RQFALKTSFI SNSWQYLIKS TEDNQIPFSQ AKDALFGIAL KSRLKEWLE
GmCAMTA13 KQLNLDVISS KVSFNRLKEA RQFALKTSFI SNSWQYLIKS TEDNQIPFSQ AKDALFGITL KNRLKEWLE
GmCAMTA14 -SSTTKDDRI ESGS----- -HLSTEQKDD DDSWSHIIDT LLDSTRTPSD AVKWLLEELL KDKLQWLLS
GmCAMTA15 -ASTIKNDNI ESGI----- -PLIK-PKAD DDSWSHIIEA LLVSGTSSG TVDWLLEELL KDKFQWLLS
Clustal Co : . . * : : * : * : . . : : **

```

```

      . . . . | . . . . | . . . . | . . . . | . . . . | . . . . | . . . . | . . . . |
      850      860      870      880      890      900      910
AtCAMTA1  KVTEEGKGP- NILDEGGQGI LHFVAALGYD WAIKPVLAAG VNINFRDANG WSALHWAAFS GREETVAVLV
AtCAMTA2  KVTEEGKGP- NILDEGGQGV LHLAAALGYD WAIKPIAAG VSINFRDANG WSALHWAAFS GREDTVAVLV
AtCAMTA3  KIAEGGKGP- SVLDEGGQGV LHFASALGYN WALEPTI IAG VSVDFRDVNG WTALHWAAFS GRERIIGSLI
AtCAMTA4  RSCDEYIIT- CSLSKQEQGI IHMVAGLGE WAFYPIAHG VNVDFRDIK WSALHWAQF GSEKMVAALI
AtCAMTA5  KVIENTRNTK- -EYDSKGLGV IHLCAVLGYT WSILLFSWAN ISLDFRDKQG WTALHWAAYF GREKMVAALL
AtCAMTA6  KVLEGRNTL- -DYDSKGLGV IHLCASLGYT WSVQLFSLSG LSLNFRDKQG WTALHWAAYF GREKMVAALL
GmCAMTA1  KITEEGKGP- NILDEGGQGV LHFASALGYD WALEPTIVAG VNVNFRDANG WTALHWAAFS GRERTVAVLI
GmCAMTA2  KITEEGKGP- NVLDEGGQGV LHFASALGYD WALEPTIVAG VNVNFRDANG WTSLHWAAFS GRERTVAVLI
GmCAMTA3  KVTENGKGP- NVLDEGGQGV LHLAALGYD WAINPIISAG VNINFRDANG WTALHWAAS GRERTVAVLV
GmCAMTA4  KVTETGKGP- LVLDEEGQGV LHLAALGYD WAINPIITAG VNINFRDANG WTALHWAAFS GRERTVAVLV
GmCAMTA5  KVTETGKGP- LVLDEEGQGV LHLAALGYD WAINPIITAG VNINFRDANG WTALHWAAFS GRERTVAVLV
GmCAMTA6  KVTESGKGP- NVLDEGGQGV LHLAALGYD WAINPIISAG VNINFRDANG WTALHWAAS GRERTVAVLV
GmCAMTA7  KVHEGGKGP- HVLDEGGQGV IHLAAALGYV WAMAPLVAAG ISPNFRDRSG RTGLHWASYF GREETVIVLV
GmCAMTA8  RIILGRKST- -EYDAQGGQV IHLCASLGYV WAIISLFSWSG LSLDFRDKFG WTALHWAAYF GMEKMVATLL
GmCAMTA9  RIILGSKST- -EYDAQGGAA IHLCAMLGYN WAIISLFTWSG LSLDFRDKFG WTALHWAAYF GIEKMVATLL
GmCAMTA10 RSQEKDEETG CSLSKKEQGI IHMVAGLGE WALNPILTCG VNINFRDING WTALHWAARF GREKMVASLI
GmCAMTA11 R---RDEGTG CSLSKKEQGI IHMVSGLGE WALNPILSCG VNINFRDING WTALHWAARF GREKMVASLI
GmCAMTA12 RIVLGCKTT- -EYDAHGQSV IHLCAILGYT WAVSLFWSG LSLDFRDRSG WTALHWAAYC GREKMVATLL
GmCAMTA13 RIVLGCKTT- -EYDAHGQSV IHLCAILGYN WAVSLFWSG LSLDFRDRFG WTALHWAAYC GREKMVATLL
GmCAMTA14 R---RDEGTG CSLSKKEQGI IHMVSGLGE WALNPILSCG VNINFRDING WTALHWAARF GREKMVASLI
GmCAMTA15 RSREKDEETG CSLSKKEQGI IHMVAGLGE WALNPILTCG VNINFRDING WTALHWAARF GREKMVASLI
Clustal Co : . . * : : * : * : . . : : * : * :

```

```

      . . . . | . . . . | . . . . | . . . . | . . . . | . . . . | . . . . | . . . . |
      920      930      940      950      960      970      980
AtCAMTA1  SLGADAGALT DPSPELPLGK TAADLAYANG HRGISGFLAE SSLTSYLEKL TVDSKENSAPA NSCGEKAQVQT
AtCAMTA2  SLGADAGALA DPSPEHPLGK TAADLAYANG HRGISGFLAE SSLTSYLEKL TVDAKENSAPA DSSGAKAVLT
AtCAMTA3  ALGAAPGTLT DPNPDFPSGS TPDLAYANG HKGIAGYLSE YALRAHVSL SLN----- -DKNAETVEM
AtCAMTA4  ASGASAGAVT DPSRQDPNGK TAASIAASNG HKGLAGYLSE VALTNHLSL TLEETENS-- -KDTAQVQTE
AtCAMTA5  SAGARPNLVT DPTKEFLGCG TAADLAQKQG YDGLAFLAE KCLVAQFKDM QTAGNISG-- -----NLE
AtCAMTA6  SAGARPNLVT DSTKDNLGGC MAADLAQQNG YDGLAAYLAE KCLVAQFRDM KIAGNITG-- -----DLE
GmCAMTA1  SLGAAPGALT DPCPEHPSGR TPADLASANG HKGIAGYLAE SLSAHLTTL DLNRDAG--- ENSGAKVVQR
GmCAMTA2  SLGAAPGALT DPCPEHPSGR TPADLASANG HKGIAGYLAE SLSAHLTTL DLNRDAG--- ENSGAKVVQR
GmCAMTA3  SMGADCGALT DSPAFPSPGR TAADLASSYG HKGISGFLAE SLSLTHLETL TMDQKGGQV EISGMKVQVT
GmCAMTA4  SMDAAAGALT DPCPEFPLGR TPADLASSKG HKGISGFLAE SLLTSHLES L TMDENKDGRK ETSGMKVQVT
GmCAMTA5  SMGAAAGAWT DPCPEFPSGR SPADLASSKG HKGISGFLAE SLLTGHLES L TMDENKDGRK ETSGTKVVQVT

```

```

GmCAMTA6 SMGADCGALT DPSPSSPAGR TAADLASSYG HKGISGFLAE SSLTHHLETL TMDDQKGGRRQ EISGMKAVQT
GmCAMTA7 QLGATPGAVE DPTSAPFRGQ TAADLGSSRG HKGIAGYLAE ADLTNQLSVL TVKENETG-- NIATTIAANS
GmCAMTA8 SCGARPNLVT DPTPQYPGGC TAADLAYMKG CDGLAFLSE KSLVEQFNEM SLAGNISG-- -----SLE
GmCAMTA9 SCGARPNLVT DPTPQYPGGC TAADLAYVKG CDGLAAYLSE KSLVEQFNEM SLAGNISG-- -----SLE
GmCAMTA10 ASGASAGAVT DPNAQDPTGK TAASIAAGNG HKGLAGYLSE IAVTSHLSSL TLEESELS-- -KSSAELQAD
GmCAMTA11 ASGASAGAVT DPSSQDPTGK TAASIAASHD HKGLAGYLSE VDLTSHLSSL TLEESELS-- -RESSELEAE
GmCAMTA12 SAGAKPNLVT DPTPQYPGGC TAADLAYMKG HDGLAAYLSE KSLVQHFNDM SLAGNISG-- -----SLE
GmCAMTA13 SAGAKPNLVT DPTPQYPGGC TAADLAYMRG HDGLAAYLSE KSLVQHFNDM SLAGNISG-- -----SLE
GmCAMTA14 ASGASAGAVT DPSSQDPTGK TAASIAASHD HKGLAGYLSE VDLTSHLSSL TLEESELS-- -RESSELEAE
GmCAMTA15 ASGASAGAVT DPNAQDPTGK TAASIAASSG HKGLAGYLSE IAVTSHLSSL TLEESESS-- -KSSAYLQAD
Clustal Co  . * . * . * . : : : . : :

```

```

.....|.....| .....|.....| .....|.....| .....|.....| .....|.....| .....|.....|
          990          1000          1010          1020          1030          1040          1050
AtCAMTA1 VSERTAAMPY YGDVPEKLSL KDSLTAVRNA TQAADRLHQV FRMQSFQRKQ LCDIGDDE-- ----KIDISD
AtCAMTA2 VAERTATPMS YGDVPETLSM KDSLTAVLNA TQAADRLHQV FRMQSFQRKQ LSELGGDN-- ----KFDISD
AtCAMTA3 APS-PSSS-- -----SL TDSLTAVRNA TQAAARIHQV FRAQSFQKKQ LKEFG-DK-- ----KLGMSL
AtCAMTA4 KTLNSISEQS PSGNEDQVSL KDTLAAVRNA AQAARIQAA FRAHSFRKRK QREAAALVA-- -CLQEYGMYC
AtCAMTA5 TIKAEKSSNP GNANEEQSL KDTLAAVRTA AEAARIQGA FREHELK-VR SSAVRFAS-- -----KEE
AtCAMTA6 ACKAEMLN-Q GTLPEDEQSL KDALAAYRTA AEAARIQGA FREKALKAAR SSVIQFAN-- -----KEE
GmCAMTA1 VQN-IAQVND LDGLSYELSL KDSLAAYRNA THAAARIHQV FRMQSFQRKQ LKEYD-DD-- ----KLGLSD
GmCAMTA2 LQN-IAQVND LDGLSYELSL KDSLAAYRNA TQAARIHQV FRMQSFQRKQ LKEYD-DD-- ----KLGLSD
GmCAMTA3 VSERATPVH YCDIPDAICL KDSLTAVRNA TQAADRIHQV YRMQSFQRKQ LTQYEGDD-- ----ELGLSD
GmCAMTA4 VSERTATPVL NGDIPDDICL KDSLNAVRNA TQAADRIYQV FRMQSFQRKQ LALYE-DD-- ----EFGLSD
GmCAMTA5 ASERTATPVL YGDIPDAICL KDSLNAVRNA TQAADRIYQV FRMQSFQRKQ FAQYE-DD-- ----EFGLSD
GmCAMTA6 VSERSATPVH FGDMFD-LCL KDSLTAVRNA TQAADRIHQV YRMQSFQRKQ LTQYE-SD-- ----ELGLSD
GmCAMTA7 ALQSVEDDSS SMTMDEQHL KESLAVFQKS AHAAASILAA FRARFCQRQ LAQSS---- ----SDISE
GmCAMTA8 TSSTDVPVNA ENLTEDQLYV KETLAAVRIS AEAARIQAA FREHSFK-LR YKAVEIIS-- -----PEE
GmCAMTA9 TSSTDVPVNA ANLTEDQLYL KETLAAVRTA AEAARIQAA FREHSFK-LR YQAVEIMS-- -----PEE
GmCAMTA10 MTVNSVSKEN LTASEDQASL KDTLAAIRNV TQAARIQSA FRSHSFRKRK AREVAAS-- ----AGGIG
GmCAMTA11 LTVSSVSEEN LVASEDQVSL KASLDVAVRNA AQAARIQAA FRAHSFRKRK ERDAAATVLD GYCIDAGSID
GmCAMTA12 TSTTDPVIA-S ANLTEDQQL KDTLAAVRTA AEAASRIHAA FREHSLK-LR TKAVASSH-- -----PEA
GmCAMTA13 TSTTDPVIA-P ANLTEDQQL KDTLTAVRTA AEAASRIHAA FREHSLK-LR TKAVASSN-- -----PEA
GmCAMTA14 LTVSSVSEEN LVASEDQVSL KASLDVAVRNA AQAARIQAA FRAHSFRKRK ERDAAATVLD GYCIDAGSID
GmCAMTA15 RTVNSVSKEN LTANEDQASL KDTLAAIRNV TQAARIQSA FRSHSFRKRK AREATAS-- ----TGGIG
Clustal Co  : . : * . : . * * : . : * : : :

```

```

.....|.....| .....|.....| .....|.....| .....|.....| .....|.....| .....|.....|
          1060          1070          1080          1090          1100          1110          1120
AtCAMTA1 QLAVSFAAS- -KTKNPG--Q GDVSLSCAAT HIQKKYRGWK KRKEFLIRQ RIVKIQAHVR GHQVRKQYRT
AtCAMTA2 ELAVSFAAAA -KTKKSG--H SSGAVHAAAV QIQKKYRGWK KRKEFLIRQ RIVKIQAHVR GHQVRKQYRA
AtCAMTA3 ERALSMLAP- -KTHKSGRAH SDDSVQAAA RIQNKFRGYK GRKDYLITRQ RIIKIQAHVR GYQFRKNYRK
AtCAMTA4 EDIEGISAMS KLTFGKG--R NYN---SAAL SIQKNFRGYK DRKCFLELRQ KVVKIQAHVR GYQIRKNYKV
AtCAMTA5 EAKNIIAAMK IQHAFRN--F EVRRKIAAAA RIQYRFQTKW MRREFLNMRK KAIRIQAAFR GFQVRRQYKQ
AtCAMTA6 EAKSIIAAMK IQNAFRK--Y DTRRKIEAAY RIQCRFQTKW IRREYLNMRK QAIRIQAAFR GLQARRQYK
GmCAMTA1 ERALSIVKMN MKSHKSG--P RDEPVHAAV RIQNKFRSWK GRREFLMIRQ RIVKIQAHVR GHQVRKSCGK
GmCAMTA2 ERALSIVKMN VKSHKSG--P RDEPVHAAV RIQNKFRSWK GRREFLMIRQ RIVKIQAHVR GHQVRKSCGK
GmCAMTA3 QQALSLLAS- -RACKSG--Q GDGLANAAAV QIQKKFRGWK KRKEFLIRQ RVVKIQAHVR GHQIRKQYKP
GmCAMTA4 QQALSLLAS- -KACRSQ--Q GEGLANAAAI QIQKKFRGWT KRKEFLIRQ RIVKIQAHVR GHQVRKQYKP
GmCAMTA5 QQALSLLAS- -KTCKSG--Q GEGLANAAAI QIQKKFRGWT KRKEFLIRQ RIVKIQAHVR GHQVRKQYKP
GmCAMTA6 QQALSLLAS- -RACKSG--Q GDGLANAAAV QIQKKFRGWK KRQEFLMIRQ RV----AHVR GHQVRKQYKP
GmCAMTA7 VLDVVADSL- -KVQKNG--H FEDYLHFAAL KIQKRYRGWK GRKDFLKIRD RIVKIQAHIR GHQVRKQYK
GmCAMTA8 EARQIVAAMR IQHAFRN--Y ESKKKMTAAA RIQHRFRTWK YRREFLNMRH QAIKIQAAFR GFQARKQYRK
GmCAMTA9 EARQIVAAMR IQHAFRN--Y ESKKKMTAAA RIQHRFRTWK YRREFLNMRH QAIKIQAAFR GFQARKQYRK
GmCAMTA10 -TISEISAMS KLAFRNS--R EYNSAASAL SIQKKYRGWK GRKDFLALRK KVVKIQAHVR GYQVRKHYK-
GmCAMTA11 NNISVLSAMS KLSQSW--R DYK----AAL SIQKKYRNWK GRIEFLALRQ KIVKIQACVR GYQVRKQYKL
GmCAMTA12 QARKIVAAMK IQHAFRN--H KTKKVMAAAA RIQCTYRTWK IRKEFLNMRC QAVKIQAAFR CFQVRKHYCK
GmCAMTA13 QARKIVAAMK IQHAFRN--H ETKKVMAAAA RIQCTYRTWK IRKEFLNMRC QAVKIQAAFR CFQVRKHYCK
GmCAMTA14 NNISVLSAMS KLSQSW--R DYK----AAL SIQKKYRNWK GRIEFLALRQ KIVKIQACVR GYQVRKQYKL
GmCAMTA15 -TISEISAMS KLAFRNS--H EYN---SAAL SIQKKYRGWK GRRDFLALRQ KVVKIQAHVR GYQVRKHYK-
Clustal Co  * * * * : : : * : * * : * * * *

```

```

.....|.....| .....|.....| .....|.....| .....|.....| .....|.....| .....|.....|
          1130          1140          1150          1160          1170          1180          1190
AtCAMTA1 VIWSVGLLEK IILRWRRKGN GLRGFKRNAV AKTVEPEPPV SAICPRIPQE DEYDYLKEGR KQ-TEERLQK
AtCAMTA2 IIWSVGLLEK IILRWRRKGS GLRGFKRDTI SKPTPE---- --VCP-APQE DDYDFLKEGR KQ-TEERLQK
AtCAMTA3 IIWSVGVLEK VILRWRRKGA GLRGFKSEAL VEK--MQDGT -----EKE EDDDFFKQGR KQ-TEDRLQK
AtCAMTA4 ICWAVRILDK VVLRWRRKGV GLRGFRQDVE STED-S---- -----EDEDILKVFV KQKQVDVAVNE

```

```

AtCAMTA5 ITWSVGVLEK AILRWRLKRR GFRGLQVS-- ---QPDEKEG -----SE AVEDFYKTSQ KQ-AEERLER
AtCAMTA6 ILWSVGVLEK AVLWRWQKRR GFRGLQVA-- ---AEEDSPG -----E AQEDFYKTSQ RQ-AEERLER
GmCAMTA1 IIWSVGILEK VILRWRRKGS GLRGFKPEAN SEGTMIQDVS -----STD DDYDVLKEGR KQ-TEQRLQK
GmCAMTA2 IIWSVGILEK VILRWRRKGS GLRGFKPEAN SEGTMIQDVS -----STD DDYDVLKEGR KQ-TEQRLQK
GmCAMTA3 IIWSVGILEK VILRWRRKGS GLRGFRPNAI NKVFNQ--- ----NDSLKE DDYDYLKEGR KQ-KEEKIQK
GmCAMTA4 IIWSVGILEK VILRWRRKGS GLRGFRPASQ NKVPEQP--- ----SESPKE DDYDYLKEGR KQ-SEVKFKK
GmCAMTA5 IIWSVGILEK VILRWRRKGS GLRGFRPAAI NKVPEQP--- ----SESPKE DDYDYLKEGR KQ-SEVKFKK
GmCAMTA6 IIWSVGILEK IILRWRRKGS GLRGFRPNVI NEVPDQ--- ----NNSLKE DDYDYLKEGR KQ-KEEKIQK
GmCAMTA7 VVWSVSIVEK AILRWRRKGA GLRGFRVGP VGVVVKD--- -----AEKS DEYEFLSIGR RQ-KSDDVKK
GmCAMTA8 IIWSVGVLEK VILRWRLKRR GFRGLQVNPA REETQESD-- -----SI AEEDFFRTGR KQ-AEERIER
GmCAMTA9 IVWSVGVLEK VILRWLLKRR GFRGLQVNPA EETQESD-- -----TI AEEDFFRTSR KQ-AEERVER
GmCAMTA10 VIWAVGILDK VVLRWRRKGA GLRGFRQEMD INENEN---- -----EDEDILKVFR KQKVDVEIEE
GmCAMTA11 ILWAVGILDK VVLRWRRKRI GIQSVRQEME SNEEES---- -----DDADFLNVFR KEKVNAAIEK
GmCAMTA12 ILWSVGVVEK AVLWRWLKRR GFRGLQVKTV EAGTGDQDQ--- -----SD VEEFFFRAGR KQ-AEERVER
GmCAMTA13 ILWSVGVVEK AVLWRWLKRR GFRGLQVKTV DAGTGDQDQ--- -----SD VEEFFFRAGR KQ-AEERVER
GmCAMTA14 ILWAVGILDK VVLRWRRKRI GIQSVRQEME SNEEES---- -----DDADFLNVFR KEKVNAAIEK
GmCAMTA15 VIWAVGILDK VVLRWRRKGA GLRGFRQEMD INEN----- -----EDEDILKVFR KQKLDVEIEE
Clustal Co : *: * :: * : * * * * * : : : : . . .

```

```

.....|.....| .....|.....| .....|.....| .....|.....| .....|.....| .....|.....| .....|.....|
1200 1210 1220 1230 1240 1250 1260
AtCAMTA1 ALTRVKSMVQ YPEARQYRR LLTVVEGFRE NEASSSASIN NKEEEAVN-C EEDDFIDIES LLND--TLM
AtCAMTA2 ALTRVKSMVQ YPEARQYRR LLTVVEGFRE NEASSSALK NNTTEEAANYN EEDDLIDIDS LLDD--TFM
AtCAMTA3 ALARVKSMVQ YPEARQYRR LLNVVNDIQE SKVEKALENS E--ATCFD-- DDDDLIDIEA LLEDDDTLML
AtCAMTA4 AFSRVLSMSN SPEARQYHR VLKRYCQTKA ELGKTETLVG E---DDD--- ---GLFDIAD MEYDTLFLSLP
AtCAMTA5 SVVKVQAMFR SKKAQQDYRR MKLAHEEAQL EYDGMQELDQ MATEES---- -----
AtCAMTA6 SVVRVQAMFR SKKAQQDYRR MKLTHEEAQL EYGLEDI-- -----
GmCAMTA1 ALARVKSMVQ YPEARQYHR LLNVVTEIQE NQVKHESYN N--SEEPR-- EFGDLNDLEA LLED--IFM
GmCAMTA2 ALARVKSMVQ YPEARQYHR LLNVVTEIQE NQVKHESYN N--SEEPR-- EFGDLNDLEA LLED--IFM
GmCAMTA3 ALSRVKSMVQ YPEARQYRR LLNVVDFRQ TKASNKGLIN S--EETVD-- GVEDLIDIDM LLDD--NFI
GmCAMTA4 ALSRVKSMVQ YPEARQYRR VLNVEDFRQ TKGGNLLIN S--EETVD-- GVEDLIDIDM LLDE--NFL
GmCAMTA5 ALSRVKSMVQ YPEARQYRR VLNVEDFRQ TKGGNLLIN S--EETVD-- GVEDLIDIDM LLDE--NFL
GmCAMTA6 ALSRVKSMVQ YPEARQYRR VLNVEDFRQ TKASNEGLIN S--EETVD-- GMEDLIDIDM LLDD--NFI
GmCAMTA7 ALDRVKSMVR NPEARQYMR LIMKYEFKI DDGSSSQSH VG----- -----
GmCAMTA8 SVIRVQAMFR SKKAQEEYRR MKLTHNQAKL ELELEEFLLS EVDMLPKT-- -----
GmCAMTA9 SVIRVQAMFR SKKAQEEYRR MKLTHNQAML D-ELEEFLLS EDDMLPKT-- -----
GmCAMTA10 AVSRVLSMVD SPDAREQYHR MLEKYRQAKA ELAGTSDEAS L---STS--- ---VGDD--- LFIDDFYFPF
GmCAMTA11 ALKRVLMSVH STGARQYRR LLSLYRQAKI EHGSTSDEAP L---STSEEN ASNMEDDDL C QFLDTFFWPS
GmCAMTA12 SVVRVQAMFR SKKAQEEYRR MKLALDQAKL EREFERLLST EVDMLPKT-- -----
GmCAMTA13 SVVRVQAMFR SKKAQEEYRR MKLALDQAKL EREYEQLLST EVDMLPKT-- -----
GmCAMTA14 ALKRVLMSVH STGARQYRR LLSLYRQAKI EHGSTSDEAP L---STSEEN ASNMEDDDL C QFLDTFFWPS
GmCAMTA15 AVSRVLSMVD SPDAREQYHR MLEKYRQAKA ELAGTSDEAS L---STS--- ---VGDD--- LFMDDFYFPF
Clustal Co :. : * : * * : * * * :

```

```

.....|.....
AtCAMTA1 MSISP----
AtCAMTA2 SLAFE----
AtCAMTA3 PMSSSLWTS
AtCAMTA4 -----
AtCAMTA5 -----
AtCAMTA6 -----
GmCAMTA1 PTAT-----
GmCAMTA2 PTAT-----
GmCAMTA3 PIAFD----
GmCAMTA4 PIAFD----
GmCAMTA5 PIAFD----
GmCAMTA6 PIAFD----
GmCAMTA7 -----
GmCAMTA8 -----
GmCAMTA9 -----
GmCAMTA10 -----
GmCAMTA11 -----
GmCAMTA12 -----
GmCAMTA13 -----
GmCAMTA14 -----
GmCAMTA15 -----
Clustal Co

```



**Regulatory Network of ATCAMTA5 (GmCAMTA12 orthologue in Arabidopsis) predicted with String database.**

(The *CGCG/CGTG* motif in promoter region is shaded in green)

1. **AT3G62140** (NIP-30)

Promoter (2 kb upstream)

ATATAATATTAGAAAACCTTGTGTACAGGCATAATATTATGTGTACCCCGGCCCTTTTCGAATGTAT  
ATCTCTTGTGAACCAGCTCCATTGGCTTTAACTG **CGTG** ATATTTTATTGTGCTATATTTATGATGTG  
TTTGTTTTTAAACTATCATGTATTTGTTTCTAACTCGCATGAGAATTGCCAATCTATTGGACGAACC  
TAGAGACCATTTTTCGACTCAAATTTATATATTATTTTATCTGTGTGCAGATAGAGATTGTAAGG  
ATCATTGTATTTTAAAACGATTGATGGGAGTTGTAATTATGAA **CGTG** GGTATAAGTGTTTCATCATG  
AAGTCGACCGAATATTAGTTCACATATATCTTAGTAATTTCTTATGTTATCCCATAGATATATTTG  
TATAGATATGATTCCCTCTATATGGTTAATTAATATACCTTCTAGGCTAGCTTCTAGCCATTTACTTG  
TTCTTCTGCGAAGTTGTTAAATATACTCTTTAAATATATCATCCACATATTGTTGTGAATATCTTG  
GGTTGGCGTATTATCATCTAATAAAGGTGTTAGTTATATTTGACACAAAAGATAATAATATGGG  
AATCCAATGAAAAAGAAAAGAATTTGCATTATATACCATATTAATTTTTTCTATATGATCAAAAT  
TGAATACAGATGAATTGCACTGTTATTTTTCAATAAAACATTTTTCTTAGCATATTGACAAATATA  
TTTCAACTATTCAATAAACAAAATAAAAAACAAATAGTCATAAATGGCTGATTCTGATTAGTTAA  
CGAATAAACGTATTCCGAGAATTGCAGCTGATTTTTTATTAACACTAGGTAATCATT **CGCG** TTACG  
CTGCGATATTTTCAGATTTTTTGTATTGTTAATTTAAATATAATTTTTTAATTATCTAATCATTCACT  
CATGTAATAAGTAATTATTCTTAGTATTAATAATATATTTTCTAACAACATTCTCAACAACGCATTA  
TACACAAAGTTCCTAAACAATGTTCTTAAACCAATTAACAGAGAGTAATGTTGGGATTCTC  
GAAACCTAAAAATTTGATGATTAAACTTCTTACATACTTTTCACCCTCGGCGATTATTATATAGA  
TATATAGCAATATGCAAACCTATTCAAACCTATTAATAATGCATGACTATTATACACTCATAATTA  
GAGTTAAGATTACGAAAAAAATCTTCAAGAAAATAATAAAATAATTTTATTAAAAACATGTA  
ATAACAAAATAAATTTAGTATTAATACAATTAATATGTAAAATTAATAATAAATATATGATTA  
ATCTATAAATTAATAAATTAAGAGCTTACATTAATTATTAGTGGATACATGACAAATGCTAAAA  
TGATGATATCATATGAAAAAATTGGCCAACCTTTCATATATATGATTGTCGTTATCATTCACTACT  
TCTCTTTTCGCTACTCGTATATAATACGTAAATATGTGTGTACATATATGATGTTATATGATTCTCT  
TCTCACATGAATAATCAAATTCGCTGTGGAGTGATCTTGTGATGAAACCATGTCAAGACAAGAAA  
TCGTAATCTAATTAATAATGGATCAATAATGAGAGGTGCAATTCGTTAAATAAATTAAGATTAG  
TAAAACCTGACATGGTATATATCCAAAAACAGTGTGGTGAATGGTATTGTTCTTACAATAAT  
ATGAATCTCGTTTATTCTTCTTTCGCGGCAGAAAAAAAAGTATTAATTTATAAAATACTTCTATTC  
TAACGAATTATTTGCGCCGAGTAATCAAGAAACCAATATTATATTAGAACTTCACAACTCAAGT  
AAACTCAAAAAGATAATCTAAACTAAAAAGTACAAAGACTTGGCCATCGATTGGATTATCTATA  
GGATTAATAAATAGAGTATCTCACTTACTTTAACTTATATTTCCATCCATACTTTAATATTAATATC  
CGTTGATATTATACTTACTACTGAAA

**CDS**

ATGGTTGATGAGACAGAAAAACCTATTAGGTTACTCAATTTTCGTCTCCGAGGAACAGTTAGATGA  
ATCGAAGAAAGAAAGAGGAGAAAGAGTTGAAGATGGAACATTCCAGAGGGACAGGGCTCTCTA  
CGAGATTTTGAAGAGAACAAAGACAAGAAGGACGCTGAGTTAATGAACGATTCAAGCATAG  
GCCACCCAAAGCTCTGGATGAAGATGAGACCGAGTTTCTTGATAAACTGGAAATGTCAAAGAGG  
GAATATGAACGTCAATTGGCAAATGAAGAAGATGAACAGCTTCGTAATTTCCAGGCAGCGGTTG

CAGCACGATCTGCAATCCTTCACGAACCAAAGGAAGCAGCACTGCCACCACCAGCGCCAGTCAC  
CAAGGAACAAAAACCAATCGGGAAGAGAAATCCTGCGACTCGTCCATTTAAAGCGATCATAAA  
AGTCAAGCCACAACCCAAGAAGGCTAAAGCAACAGAGAAAAGAAGAGAAAGAGATCCCAGGGA  
ATGAAAACCGGCCAGCCATATCGACCAGGCTTCTTTAGATTCTGTAAAAGGCAATGTCACAGG  
TAAACTACTGAAGGTCTGCAAACCTGGTTTAGCCTTAGTCTCATATAGTGATGAAAGTGAAGACG  
ATGATTAA

### Protein

MVDETEKPIRLNLFVSEEQLDESKKERGERVEDGTFQRDRALYEILKENKDKKDAEFNERFKHRPPKAL  
DEDETEFLDKLEMSKREYERQLANEDEQLRNFQAAVAARSAILHEPKEAALPPPAPVTKEQKPIGKRN  
PATRPFKAIKVKPQPKKAKATEKEEKEIPGNKGPASHIDQASLDSVKGNVTGKTTEGLQTLALVSYSD  
ESEDDD\*

## 2. AT1G30650 (WRKY14)

Promoter (2 kb upstream)

ATATAATATTAGAAAACCTGTGTACAGGCATAATATTATGTGTACCCCGGCCCTTTTCGAATGTAT  
ATCTCTTGTGAACCAGCTCCATTGGCTTAACTGCGTATATTTTATTGTGCTATATTTATGATGTG  
TTTGTTTTAAACTATCATGTATTTGTTTCTAACTCGCATGAGAATTGCCAATCTATTGGACGAACC  
TAGAGACCATTTTTCGACTCAAATTTATATATTATTTATCTGTGTGCAGATAGAGATTGTAAGG  
ATCATTGTATTTTAAAACGATTGATGGGAGTTGTAATTATGAACTGGTATAAGTGTTTCATCATG  
AAGTCGACCGAATATTAGTTCACATATATCTTAGTAATTTCTTATGTTATCCCATAGATATATTTG  
TATAGATATGATTCCTCTATATGGTTAATTAATATACCTTCTAGGCTAGCTTCTAGCCATTTACTTG  
TTCTTCTGCGAAGTTGTTAAATATACTCTTTAAATATATCATCCACATATTGTTGTGAATATCTTG  
GGTGGCGTATTATCATCTAATAAAGGTGTTTAGTTATATTTGACACAAAAGATAATAATATGGG  
AATCCAATGAAAAAGAAAAGAATTTGCATTATATACCATATTAATTTTTTCTATATGATCAAAAT  
TGAATACAGATGAATTGCACTGTTATTTTTCAATAAAACATTTTTCTTAGCATATTGACAAATATA  
TTTCAACTATTCAATAAACAAAATAAAAAACAAATAGTCATAAATGGCTGATTCTGATTAGTTAA  
CGAATAAACGTATTCCGAGAATTGCAGCTGATTTTTTATTAACACTAGGTAATCATTCCGTTACG  
CTGCGATATTTTCAGATTTTTTGTATTGTTAATTTAAATATAATTTTTAATTATCTAATCATTCACT  
CATGTAATAAGTAATTATTCTTAGTATTAATAATATATTTTCTAACACATTCTCAACAACGCATTA  
TACACAAAGTTCCTAAACAATGTTTCGTCTTAAACCAATTAACAGAGAGTAATGTTGGGATTCTC  
GAAACCTAAAAATTTGATGATTAAACTTCTTACATACTTTTCACCCTCGGCGATTTATTATATAGA  
TATATAGCAATATGCAAACCTATTCAAACCTATTAACTAATGCATGACTATTATACACTCATAATTA  
GAGTTAAGATTACGAAAAAAAATCTTCAAGAAAACATAAAAATAATTTTATTAAAAACATGTA  
ATAACAAAATAAATTTAGTATTAATACAATTAATATGTAAAATTAATAATAATAATATATGATTA  
ATCTATAAATTAATAAATTAAGAGCTTACATTAATTATTTCAGTGGATACATGACAAATGCTAAAA  
TGATGATATCATATGAAAAAATTGGCCAACCTTCATATATATGATTGTCGTTATCATTCACTACT  
TCTCTTTTCGCTACTCGTATATAATACGTAAATATGTGTGTACATATATGATGTTATATGATTCTCT  
TCTCACATGAATAATCAAATTCGCTGTGGAGTGATCTTGTGATGAAACCATGTCAAGACAAGAAA  
TCGTAATCTAATTAATAATGGATCAATAATGAGAGGTCGAATTCGGTTAAATAAATTAAGATTAG  
TAAACTTGACATGGTATATATCCAAAAACAGTGTGGTGAATGGTATTGTTCTTACAATAAT  
ATGAATCTCGTTTATTCTTCTTGGCGGCAGAAAAAAAAGTATTAATTTATAAAAATACTTCTATTC  
TAACGAATTTTTGCGCCGAGTAATCAAGAAACCAATATTATATTAGAATTCACAAACTCAAGT

AAACTCAAAAAGATAATCTAAACTAAAAAGTACAAAGACTTGGCCATCGATTGGATTATCTATA  
GGATTAATAAATAGAGTATCTCACTTACTTTAACTTATATTTCCATCCATACTTTAATATTAATATC  
CGTTGATATTATACTTACTACTGAAA

### CDS

ATGTGCAGCGTCTCTGAGCTTCTTGACATGGAAAACCTCCAAGGAGACTTAACCGACGTCGTACG  
AGGAATCGGAGGCCACGTGTTATCACCGGAGACTCCTCCCTCGAACATCTGGCCTCTTCTCTGT  
CACATCCAACACCATCACCGTCAGATCTTAACATAAACCCCTTCGGAGATCCCTTTGTGAGCATG  
GACGATCCACTCCTCCAAGAACTAACTCCATCACAAACTCCGGCTATTTCTCCACCGTAGGAGA  
TAACAACAACAACATTCACAACAACAATGGTTTCTTGGTTCCAAAGGTATTTGAGGAGGATCATA  
TAAAGAGTCAATGTAGTATCTTCCCAAGAATCCGGATCTCGCATAGTAACATCATCCACGATTCT  
TCTCCGTGTAATTCTCCGGCCATGTCCGGCTCACGTTGTTCGACGCCGAGCAGCCGCCTCGCCGAG  
AGGCATCATCAACGTAGACACAAACAGTCTAGAACTGTCTATTGGTTGATGGTACCACGTTCT  
CCTCGCAGATTCAGATATCTTCCCCTCGGAATCTAGGCCTTAAAGAAGGAAGAGTCAGGCAA  
GAAGGTGGTGTGATTCCGGCCCCGGCTGCAATGAACAGCCGATCAAGCGGAGAAGTGGTTCCA  
TCGGATCTATGGGCTTGGCGTAAATACGGTCAAAAACCTATCAAAGGCTCTCCTTTTCCAAGGGG  
TTATTATAGATGCAGCAGCTCAAAGGTTGTTTCAGCAAGAAAGCAAGTCGAAAGAAGCCGAACC  
GATCCAAACATGTTGGTGATTACATATACCTCCGAACATAACCATCCTTGGCCCATCCAACGCAA  
CGCTCTCGCCGGCTCCACACGCTCCTCCACCTCCTCCTCATCTAACCTAATCCTTCCAACCCTC  
AACCGCAAACGTAAACTCCTCATCCATTGGCTCCCAAAACACCATCTACTTGCCTTCTCCACCA  
CTCCTCCTCCTACCCTCTCATCTCCGCCATCAAAGATGAACGAGGGGACGATATGGAGTTGGAA  
AACGTAGATGATGATGATAACCAGATTGCTCCATACAGACCGGAGCTTCATGATCATCAGC  
ACCAACCAGATGATTTCTTTGACAGATCTTGAAGAGCTAGAAGGAGATTCTCTAAGCATGTTGCTT  
TCTCATGGCTGTGGCGGCGACGGGAAGGATAAAACGACCGCGTCCGATGGGATCAGCAATTTCT  
TCGGGTGGTCGGGAGATAATAATTATAATAATTACGACGACCAAGACTCAAGGTGCTTATAG

### Protein

MCSVSELLDMENFQGLDLDVVRGIGGHVLSPETPPSNIWPLPLSHPTPSPSDLNINPFGDPFVSMDDPLL  
QELNSITNSGYFSTVGDNNNNNIHNNNGFLVPKVFEEDHIKSQCSIFPRIRISHSNIIHDSSPCNSPAMSAH  
VVAAAAAASPRGIINVDNTPRNCLLDGTTTFSSQIQISSPRNLGLKRRKSQAKKVVCIAPAPAMNSRSS  
GEVVPDLWAWRKYGQKPIKGSPPFRGYRCSSSKGCARKQVERSRTDPNMLVITYTSEHNHPWPIQR  
NALAGSTRSSTSSSNPNPSKPSTANVNSSSIGSQNTIYLPSTTPPPTLSSSAIKDERGDDMELENDVDDDD  
DNQIAPYRPELHDHQHPDFFADLEELEGLSMLLSHGCGGDGKDKTTASDGISNFFGWSGDNNY  
NNYDDQDSRSL\*

### 3. AT1G53720 (CYP59)

Promoter (2 kb upstream)

AAAAGGTCAACATTGAATTAGTTGTCCCCTGTTAAAATGGCTATCTTTAAAGCTAACTCAAGTTCT  
GTATGATGAAATGGAAAGGTAGAAGTTTACATTACTTCTTGATCTTGAGAATGGCGCCAAAACCG  
CTGTACATGAAACAGTATACATTAGACCATAAACAAAGTGTTAATCCTTTGAGTTACATACAATT  
CTAGCTGACAAATCACCTGATCAATGACAGAACTACCACGATGAGGGCCACATGGGGTTTGATC  
AGGCCGATATAATGGGATGTGGGTCAATAAACTCTAGGATGTGACTGTGCGTCTAAAAAAGAT  
AAGAAAATTTTATGTATAAGCTTCACAAAGATAGTATATACAGAAGAGGATGCAGCTGAATAAC  
ACACACACCGGTGGAGACATTTTGTACAAACTTCCAAACTTCTGAGGCCAGATCCTTTTTAGAAT  
TCCCTGCAACATATACATCACTTTTTCAGTTACAGATCCTTGGTTTCTCTTTGAGGAGAAATTCTAA

GCATGTA AAAACAATATCTTAATGATCAGAGCAAAGTTTGTAAACAACCATCGATAGCTTGGGCATC  
AATACTGATGAACTCAACATTTCCAATCATAAATCTGCGGTTTCTGACCCCAAATACTTTTTTCGTA  
TCGATCAATCACCTGTTGAATTGTGAAGGTATATCAATATATAGGTCGCTGACATATGTTATACAT  
TTGAGAAAAAAAAGTGATAAATGTACTACGCCTTGCTTATGGGAAGCAACCCGAGAATAGCC  
AATGTCATGATTCCAGGGATGTAAAATGTAGGGATATCCCCAACTCTGCCTTCTGAATTCAAAC  
CAAATACATGTTTCAATCGGTTTAAAGACTCCTGCCATCTGATAAAAATAAGAAGTTAAGCATTTC  
CACGAACCCTTTGAGCAGAAAGAAGAACAAGTGAAAGACAAGAACAAGGAGAGCTTACTCTTC  
CTCGGAAAGAAATGGCCCGCCATCGAAATAATCACCTAAAAACAAAACAACATCGGGTTTGAA  
AGGCAAGACAGACCGAAAGAATGATCTCCGCATGTTTATATCAGTATAAAACTGAGCAAGCTCC  
AAAGCAAGTGTCTTTGACGACAAACGAAACGATGTCTTATCCATGAGCTGCATAAAAACAACAA  
CAATAAACACATAATCAGATGATCAAACCTCCATTA AAAACAACACACAACAAAATCGAAAATC  
ATTTGAAGAGCTCACCTGTGGATCAGTAACAATGGCTACTTTAGTAAAATTTCCATCACTCTCCAC  
TCCATCACTCTGCAACACAAAGAAGCTAACAGATATTTAGTAATCACA ACTAAACAGTGACTAG  
AATAAATGATGAATCATAGAGATTTCTTCCACATTGGCCTTCTAATAATGTTGCATCTAAGCTATT  
TTTTCGATTAGAGAACGATTACATTCTCAAGAATAAGAATATAAAAACCTTGGCTTTATACAATTT  
ATAGCAACACAAGGATGATTACAGAGAGAAATAAGCAAATACACAATCAAGGTCGAATTAAC  
GCAATGAATCTCCAAAATTGAGCATCCGTTACTGAAAAAATGGAACTTTTTGGAGAGAGAGA  
CCTTATGGTGAGGCCAAGAACAAGTGAAGAGAGAAGGAACCCAGAAGGCCGAACATTTCTCCGT  
AGAGGATCGTCGCAGCCCAAATGAGACATAACGCCAC **CGTC**AGCTTATGGTGGTGTTTCATTTTT  
TCCGAGTATCTGAATCTCCTCCCTTCTCGGCTTTGCTTCGCCGAGATATGTATCTAATGATCGTTGT  
CGTTGACCAAAGAGCGGTCAAGA **CGCC**ACAGACGCTGAGCTGCGTTTGAGTATACCGAAAA  
CGCCGAACTTGGGAATGAATGCGCTATTCCAAA ACTACTGGGCCGAGTTTATATTGGGCCTATA  
CTTTTGTGTTATTGGGCCTATGCTTATTAGAACAGTGACGAACAAAGAAATAATGAAAAAC

**CDS**

ATGTCAGTTCTTATTGTGACGAGCCTTGGTGATATAGTAATTGACCTTCACTCGGATAAATGCCCT  
TTGACTTGCAAGA ACTTCCCTAAGCTTTGCAAGATCAAGTACTACAATGGGTGTCTTTTTCACACT  
GTGCAAAAGGATTTACAGCACAGACTGGTGATCCA ACTGGTACGGGAGCTGGTGGAGATTCAA  
TCTACAAATTTCTGTACGGTGAGCAGGCTCGTTTTTACAAAGATGAGATTCATCTTGATTTAAAC  
ATTCAAAGACCGGCACTGTTGCAATGGCCAGTGGTGGAGAGAATCTCAATGCTTCCCAGTTCTAT  
TTCACACTTCGTGATGATTTGGACTATCTTGATGGGAAACACACTGTGTTTGGACAGATTGCTGAG  
GGGTTTGACACTTTGACTAGGATAAATGAAGCTTATGTTGATCCGAAGAACAGACCCTATAAGA  
ACATTAGAATCAAGCACACACATATACTTGATGATCCATTTGATGATCCCCACAGCTGGCTGAA  
ATGATGCCAGATGCTTCCCCTGAAGGAAAACCGAAAGAAGAGGTCAAAGATGACGTGCGGCTTG  
AAGATGATTGGGTTCCAATGGATGAAGAACTTGGTGCTCAGGAACTGGAGGAGTTATCCGCGA  
AAAGGCAGCCATTCAAGTGTGTTGTACTTGAAAGTATAGGAGATATCCCCGAGGCTGAGGTA  
AAACCTCCTGACAATGTGCTGTTTCGTCTGCAAACTGAATCCAGTACTGAGGATGAAGACCTCCA  
TACCATTTTTTACGCTTTGGAACCGTTGTATCGGCTGATGTAATCCGGGATTTCAAGACAGGTGA  
CAGTTTGTGCTATGCTTTTATAGAGTTT GAGAACAAGGAGTCATGCGAACAAGCGTACTTTAAGA  
TGGACAATGCTCTGATCGATGATAGACGATA CATGTGGATTT CAGTCAGAGTGTGTCCAAACTT  
TGGTCACAGTTCAGGCAAAAAGACTCCCAAAAAGGGCAAAGGGAATGGGTGTTTCAAATGCGGCT  
CGACGGATCATATTGCCAAGGACTGTGTGGGTGGTCCGTCTTCAAAGTTTATTGTAAAAGATCAA  
AACAGACAGCACGGAGGAGGTGAAGGCTATGAGATGGTGT TTGAGGGT GATGTGCATGAAACC  
CCCAAGCATAATAGTCATGAGAGGGAGAGGAGTGAGAAGATTCAGAGGAGAAGTCTCATGGT  
AATGGGAAGGCAAAAGACAGCACAGAGATGAACGTGATGATGGTAGAAGACAGCATGATCG



ACTCCTAAAATCAAGGTCTAATGTCCATTTCTTTGCATATTTCAACCCAAAACCCAATCGCCAC  
AAATCACACCACACCAACAAAACAAAAGAAAAACAAAATCAAGAGAATACAACAAAAA  
GAAAGAAGAAAGGTATAGAGTTTTACAATATCTTCTTCGGAATCTTTAGAGGAAGAAAGAAAA

### CDS

ATGGCAACAATGAAAATACCAATGACGGTACCTTCTCCTCGAGTCGATGCTGACCAACTCTTTAA  
GGCCTTCAAAGGAAGAGGCTGCGATACTTCGGTGATCATCAACATCTTAGCTCATCGCAATGCAA  
CACAACGAGCTCTCATCGAACAAGAATACGAAACCAAATTCTCGGATGACCTCCGAAAACGTCT  
CCACTCTGAGCTTCATGGTCATCTCAAGAAAGCCGTTCTTTTGTGGATGCCTGAAGCAGTGGAGC  
GAGACGCTTCAATACTGAAACGCTCCTTAAGAGGAGCCGTGACTGATCATAAAGCGATTGCTGA  
GATTATATGCACACGATCTGGCTCTCAGCTTCGTGATCAAAACAGGTCTACTCAAACACTTTTCG  
GTGTGAAACTTGAAGAGGACATCGAATCCGAAGCTTCTGGCAATCACAAAAGAGTTTTGCTCGC  
GTATTTGAACTACGCGATATGAAGGACCAGAGATCGATAATGCGAGTGTAGAGAACGATGCT  
AGGACTCTCAAGAGCGCGTTGCAAGGAAGCATAAATCTGATGACCAGACGTTGATTCAGATAT  
TCACTGACCGAAGCAGGACTCATTGGTTCGCTGTAAGATCTACTTACCGTTCATGTACGGCAA  
GAACTTGAAAGGCCATAAGAGATGAGACTCGCGGGAACCTTCGAGCATGTCCTTCTAACAATTT  
ACAATGTGCTGAAAACCTTTGTTTCTATTTTCGAAAGGCATTGAGGAAATCAATGAAAGGATTAG  
GAACAGATGACACGGCGTTGATAAGAATCGTGGTGACGAGAGCAGAGGTGGATATGCAGTTCAT  
CATCACAGAATACCGTAAGAGATACAAGAAGACTTTGTACAATGCTGTTTATTCTGATACTA  
GTCATTACAGGACTTTTCTCCTCTCTTTTAGGCCCAACGTTTGA

### Protein

MATMKIPMTVPSPRVDADQLFKAFKGRGCDTSVIINILAHRNATQRALIEQEYETKFSDDLRLHSEL  
HGHLKKA VLLWMPEAVERDASILKRSLRGAVTDHKAI AEIICTRSGSQLRQIKQVYSNTFGVKLEEDIES  
EASGNHKRVLLAYLNTRYEGPEIDNASVENDARTLKS AVARKHKSDDQTLIQIFTDRSRTHLVA VRST  
YRSMYKELGKAIRDETRGNFEHVLLTILQCAENSCFYFAKALRKSMKGLGTD TALIRIVVTRA EVD M  
QFIITEYRKRYKKTL YNAVHSDTTSHYRTFLLSLLGPNV\*

### 5. AT4G11640 (SR)

Promoter (2 kb upstream)

TTGTCGATTCTCTTGC GGAGAGATGCAATCGATT **CGTC** GCAGTACACGGTTGCTTCAGAGGCAT  
CGTTTCTCCATCTCCAACACTCTTCGTTTCACTTCTTCTTCTTGTGGAAGCTGGTCTGAAAATG  
AATCCAGAAA ACTAGGGTTTGATTCTTGCCCTTCTAGCAGAGCTGCGACATATCTCATTAGCTCGT  
TGAAAAATGCAGGCTTTTCTCTTCAGCTATACCTGTAAGCCACTTTTCGTTCTCTATCTTGGTTTAA  
CATTGTGCGAAATGTAGAAGAGGTTTGGTTGGTAATGGAGATCTTATATCAAATGGGTTTGAAAAT  
TGCAATTAGTGTAGAAAAACGAAACTTTGCTCTTGTGTGGTAGTAAGAGTTATGTAGATATAGA  
AGAACCAGCTTTGACACAAGTTTATGATTCACAAGTTGTTCTACTTTATATGTTTGGGTCACAG  
TGATATCTATCTAGTATGTTAATGTACATTAGGTTTCTA **CGTC** TTTACGATGTTCTTGAAATATTT  
TGGCAGAAACAAAACCTTACGTATGCGTCGAGGTGTTTTCCACCCTGGAGATTCTTCTGTTCAA  
GGATCTCCTGAGTCAGATTGTGTTGTGCCTCAGAGAATCAAGTTAAGCGGCTTGATAAAACCGC  
TAAGCATATAATGCAGGTACTACA ACTCAATTACTAGACA ACTGTCATGGATAAATCATGTCATA  
TGACACAATCTTCTGCAGATTGTAGACAAGGAAGCGTTGAGGAAGTGAGATCTCTTAGAGAGA  
TTCTGAGATAAAGCCCGTTACATTGTGCAGCTAAAAGTGGTAATTTCTTTTTCTTGGTGAATG  
GGATTGAACTATCTTGTCTTTAAAGTGAAACCTTTTCATAGGCTTGCCATTTACTTTTTGTTTTAA  
CAGGAAGTGCCTGAGAACAAGAGA **CGTC** TATCAAT **CGTC** AAAGGCGTCGTCATAGCAAGGCGT

AATGCTGGTCTGAACTCAACATTTAGAATTAGAAGGCTTGTGCTGGAGTGGGCGTTGAATCCAT  
GTTCCCTTGTAAGTAACCTGAAGCTCAAACCTGCAACTACTTATTCTTTTTTCTTTCTCTCAGAAT  
TTGTATATGATATGATAACTCAAGCCACCATGTTTTGTGTGCCTTAAATTGATGTGAGTGAGGGTG  
TTTGGTGACAGGTATTCCCCAAACCTGAGGGAGATTAAGGTGGTGGACAAGAAGAAAGTAAGAA  
GAGCCAAGCTATATTACCTCAGGGACAAGGTGAATGCTCTTAAGAAGCATTAAACAACCTCAGTA  
AAAAAAACAATCTACTCGTCTCTTAAACAATTTTCCAATGTTTTAGTTGCACTCTCTCAAAGGA  
GACGATTTGCCTCAAATTTACGTATTGAATTTGTGCAATGGTGAATCTTCTTCAATTCTTCTCT  
CCCTGTTGGAAAAAGCACATGGGCTAAAGACATGTTATAGTTTTATATATGGAGACAAGTAATC  
CACGACGTTTCTTGTATAATAAAACAGCGTCTTTTTTTAGCTCCATAACACAACGCTGT  
CTTTGAGTAAATGTATCTGTCTCTCGAATTCTGCAATTTCTGAACTGGGCAAATTGAAATTCC  
CAATCCTAAACCCTAAGCTCAAATTTGAGAAATTAGGTTTGTTCATCCTTTCTTTGTCTCAGTCA  
CTTAGTTTTGGTTTTAGTAGACTCCTTTGTATTTTTTAACCCAAAATTGCAATGTCAAAGTTT  
CAGTCTTTTGCAACTTCTGTCTGTCTTTTGTGATTTGAGACAGAAGAGAACTTAATTTGTCTTT  
AAAGCTAACATTTTTAGGTAGCAAAAATTAGTATATTGAGCATAAAGTTAACAAATTTGAAGTTA  
TTTAAGATGATTGAGGATATGGTTTTCTATTCTGATAAGTAGGAAGTTGATGAAGTGATAATGAA  
GCTTCTTTGAAATGTTTTACTTTTTAGAA

#### CDS

ATGGAAGCAAATAGAGAGAAGTATGCTGCTGATATATTGTCCATAAAAGAAGCTCATGACCGTA  
TTAAGCCGTATATACATAGAACTCCGGTGTTAACATCTGAATCGTTGAATTCATCTCCGGAAGA  
AGCTTGTTCTTTAAGTGTGAGTGCCTTCAGAAAGGTGGAGCTTCAAATTCGGTGGAGCTTGAAT  
GCTGTTTTGTCTCTTGATGCTGAACAAGCAGCCAAAGGAGTTGTAACACACAGCAGTGGAAACC  
ATGCTGCTGCATTGTCTTTGGCTGCAAAGATTCAGGGAATACCGGCATATATTGTTGTACCAAAA  
GGTGCTCCAAAGTGCAAAGTTGATAATGTGATCAGGTATGGTGGTAAGGTTATATGGAGTGAAG  
CAACAATGTCTTCTAGAGAGGAAATAGCTTCAAAGTTTTGCAGGAAACAGGTTTCACTTCTGATC  
CATCCATATAATGATGGACGCATTATAAGTGGTCAGGGTACAATTGCATTGGAAGTCTGGAGCA  
AATCCAAGAGATTGATGCTATAGTTGTGCCGATAAGCGGGGGTGGTTTGATATCTGGTGTGGCGC  
TTGCTGCCAAATCTATTAAGCCTAGTATCCGGATTATAGCCGCTGAACCAAAAGGAGCTGATGAT  
GCGGCTCAGTCTAAGGTCGCTGGTAAAATCATCACTTTACCTGTGACTAATACTATAGCTGATGG  
CCTTCGAGCTTCTCTTGGAGATTTAACCTGGCCGGTGGTGGAGGACTTGGTAGATGATGTTGTCAC  
CTTGGAAGAGTGTGAAATAATCGAAGCCATGAAAATGTGCTATGAGATACTGAAGGTCTCTGTG  
GAACCAAGTGGAGCTATTGGCCTTGCAAGCAGTTTTATCAAACAGTTTCCGCAACAATCCTTCTGT  
CGTGATTGCAAAAACATAGGAATTGACTCTCAGGAGGTAATGTTGATTTGGGCTCTCTATGGGA  
TTCATTTAAGAGTTCAAATAA

#### Protein

MEANREKYAADILSIKEAHDRIKPYIHRTPVLTSESLNSISGRSLFFKCECLQKGGAFKFRGACNAVLSLD  
AEQAAKGVVTHSSGNHAAALSLAAKIQGIPAYIVVPKGPCKKVDNVIRYGGKVIWSEATMSSREEIAS  
KVLQETGSVLIHPYNDGRIISGQGTIALELLEQIQEIDAIVVPISSGGLISGVALAAKSIKPSIRIIAAEPKGA  
DDAAQSKVAGKIITLPVTNTIADGLRASLDLWVVRDLVDDVVTTLEECEIIEAMKMCYEILKVSVEPS  
GAIGLAAVLSNSFRNPNPCRDKNIGIVLSGGNVDLGSLWDSFKSSK\*

#### 6. AT5G50320 (ELO3)

Promoter (2 kb upstream)

GTCCTTTTTCTTTTGTGTTGTTGTTGTTATATTGGCTTGCATTATGAAATATACTGACACCACACT  
GAATCTATATCTCCTCTTTCTTCAGCAATATACTTAACAGTTTATCCCGTATGGCCAAATGA  
TACTGAAAAGTGGTTTCTTTCATGCGGATCCACATCCTGGAAATATCTTGATTTGCAAAGGTCAA  
GAGGCAAGTCATATTTTGTGTTAGTCATTATTTGGTAGTTTTTTAATTCGCTTAGTGTTACCTTCTG  
GCAGAACTTGCCCGTCTATATAGTCTGAGTTGTAATCTTGTTTCCCGTCATTAGGTTGCATTGCTGG  
ACTATGGTCAAGTGAAGGAACTACCCAACAAGTTGAGACTTGGTTATGCAAATTTGGTCATTGCC  
ATGGCTGATAACAATGCTTCACGAGTATCACAGAGCTTTTGGTAACTCAAACTCATTAAATCTC  
CATGCACTACTGAAGTAACTTTGTGATCTAAATTGTTTCGTTTTTGTTCATATCATCTGTTTTGTGGC  
TCAAAAGCATTTTTGTCAATTAGCAAATCTTTTCTTTTGTGAGAAAGATATTCCAATAAGAACCAGTC  
CATAAAAGGTGAAACCATTTGTTACCACAAAAGTTATTTTGTGAGCGAGGATTTCATTTTGTTTAG  
GCTATGAAGATTAAGTACTTGATCATTATGTTCAAAAAACGGCTTTTCCACTTTTAAATTGAATAG  
TTTAGTATGTGAGAACTGTTTTGAGGCAAGTATGTGGTGGATTATTATGATTGAAAGTGATAAGA  
AAACGTTTTTTTTGTCCAATATTGGAATATTCAGTGTCAACAGTTTGGATTACTGCAGCACTAAA  
TTCCTTAAGTTATTGTGGCTGTGAATGTTTCAGGGAAATGGGTTTACATACAGTGGCCAAGTGTGA  
GAATGAGCAGCAAGAACTTCTGCGGTTAGCACAAACACTTTTTGATACAAAGATGCCTACTGGTC  
AGACAGTTTTACAACCTTTCTCAGATGACTCTTCGATTA AAAAGATAGCCGTTGAGGTAAGTAAA  
GCTCCATTGATGGTCACAAAGTAAAAAAAAGTTGTGTGTTCTACAGGTAATAATATATACCAAAC  
TAACTGAATGTGTTCTTTGTGCGGTAGACATTTCCAGAGGAACTGTTCTGTACTTCGCACTGTG  
GTTCTGTTAAGAGGACTCAGTGTGGGATGGGAGTTAATTATTTCGTCAGAGAACAATGGAGAGC  
AATGGCCGAAGAGGCTTTACTTGCATCTGGAAGAGTGACAAGAGGTAAGTGGTTATATCGTATA  
GTACTCACTACACTTTTTGCATAAAAAACAAGTGTGATGGAGTTGGTAACATAACACCTGAGTT  
TTACAGATGGCAAAGAAAGATCTCGTAGACGGGCTTCTCTACGAAGGCTACGCACAGGAAGTTA  
GGAAAAGATAGGAGTATTTCTCATCACTTAGACTCTCCCATGAGCAGGATCTGAGCTTTTTTCAT  
TTATTGTTCTTTCTTTTGTGAGAATTTGAATGATAGGAGAAGTTGGATAACACTTGAATGTAATTG  
GCTGATATAAAATTATGATGGAAGATTTGTAATCAAGATTTAATTCCCAAAGATAGGATTATA  
TGTTTTGGTACTCCTTCTCCACAATAGTTGGAGAGGACTATTATCTCCAACAGCTATAAGCCATCT  
TGGCTATTACGTCCGCACATATATATGCCATTACGATTCATGGAGTCATTCTCAAAGATGACTGC  
CTCAAACCCAAGTTATCACTGCACATCATTGTCTAACACAAAAGGCTGGTGCTTCAGCTTCTTA  
AGGAGACTGAATCTTCATATAGATTTTGGTCCACACCATTTTATGTCTTTTCTGTTGCCTCAAAAA  
AAAAAATTGAAGCGTTGACAAAAAAAAGTTAAACAGATTAAAACGATGTGCTTTAAAGGAT  
TTCATTAACACAAAATCTGCGTTCAACGAGTTC

**CDS**

ATGGCGACGGCGGTAGTGATGAACGGCGAGCTGAAAAAGCAACCTCGGCCAGGTAAAGGCGGC  
TATCAGGGCCGTGGATTA ACTGAAGAAGAAGCTCGAGTTTCGCGCCATATCGGAGATTGTTAGCA  
CCATGATTGAGCGTTCACACCGCAACGAGAATGTTGACCTAAACGCAATTA AAACCGCCGCTTG  
CCGAAATACGGCCTAGCACGTGCGCCTAAGCTCGTGGAGATGATTGCTGCGCTTCTGATTACG  
AGAGAGAGACTTTCTCCCGAAGCTCCGTGCCAAACCGGTTCGAACAGCTTCAGGGATCGCCGTT  
GTGGCGGTTATGTGGAAGCCTCATAGGTGCCCGCATATAGCTACGACGGGGAATATATGCGTTTA  
TTGTCCCGGTGGACCTGACTCTGACTTTGAGTATAGTACTCAGTCTTACACTGGATATGAGCCTAC  
CAGCATGCGAGCTATTTCGAGCCAGGTACAATCCATATGTTTCAGGCAAGAAGCAGGATAGATCAG  
CTGAAGCGGTTGGGTCACAGTGTAGATAAGGTTGAGTTCATTTTGTGAGGAGGTACTTTTCATGTC  
ACTGCCTGCTGAGTATCGGGATTTCTTCATACGGAATCTTCATGATGCTTTATCAGGACACACTTC  
TGCCAACGTTGAAGAGGCAGTTGCTTACTCTGAACATAGTGCAACTAAATGCATTGGGATGACA  
ATTGAAACGAGGCCAGATTACTGCCTTGGACCTCATTTACGACAAATGCTGATTTACGGTTGCAC



CCGGCTAGAGATAGGTGTCCAGAGCACATATGAAGATGTTGCCCGTGACACAAATAGAGGTCAT  
ACTGTTGCTGCTGTAGCTGACTGCTTCTGCTTGGCTAAAGATGCTGGTTTCAAGGTGGTTGCACAT  
ATGATGCCTGATCTTCTAATGTTGGGGTTGAGAGAGACATGGAAAGTTTCAAGGAGTTTTTCGA  
GAGCCCATCTTTAGAGCAGATGGGTTAAAAATATATCCCACCTTGTGATCCGTGGAAGTGGAC  
TTTATGAACTATGGAAACTGGGAGGTACCGAAATTATCCACCTGAGCAGCTTGTGGATATAGTT  
GCAAGGATTCTCCATGGTACCTCCATGGACACGTGTATATAGAGTTCAGCGTGATATTCCTATG  
CCTCTGGTTACGTCAGGGGTAGAAAAAGGAAATCTTCGTGAACTGGCTCTAGCCAGAATGGATG  
ACTTGGGCCTTAAATGCCGTGATGTCCGTA CTGTAAGCTGGAATTCAGGACATTCATCATAAA  
ATTAAGCCAGAACAAGTAGAGCTTGTGCGTCGTGATTACACTGCCAATGAAGGTTGGGAGACGT  
TCCTTTCTTATGAAGATACACGCCAGGACATTCTTGTGGATTGCTACGTTTGCGAAAATGCGGGA  
AGAATGTAACGTGTCCAGA ACTCATGGGAAAGTGTCTGTTGTCGCTGAGCTTCATGTATACGGA  
ACAGCTGTACCAGTTCATGGTCGAGATGCTGATAAGTTGCAACATCAGGGCTATGGTACACTTCT  
GATGGAAGAAGCAGAGAGGATTGCTAGAAGAGAACATCGATCTAACAAAATCGGTGTGATTCT  
GGTGTAGGAACCAGACATTACTACAGAAAGTTGGGTTATGAATTGGAAGGTCCTTACATGGTGA  
AGCATCTTCTTTGA

**Protein**

MATAVVMNGELKKQPRPGKGGYQGRGLTEEEARVRAISEIVSTMIERSHRNENVDLNAIKTAACRKYG  
LARAPKLVEMIAALPDSERETLLPKLRAPVVRTASGIAVVAVMSKPHRCPHIATTGNICVYCPGGPDS  
FEYSTQSYTYEPTSMRAIRARYNPYVQARSRIDQLKRLGHSVDKVEFILMGGTFMSLPAEYRDFIRNL  
HDALSGHTSANVEEAVAYSEHSATKCIGMTIETRPDYCLGPHLRQMLIYGCTRLEIGVQSTYEDVARDT  
NRGHTVA AVADCFCLAKDAGFKVVAHMMPDLPNVGVERDMESFKEFFESPSFRADGLKIYPTLVIRGT  
GLYELWKTGRYRNPPEQLVDIVARILSMVPPWTRVYRVQRDIPMPLVTSGVEKGNLRELALARMDDL  
GLKCRDVRTREAGIQDIHHKIKPEQVELVRRDYTANEGWETFLSYEDTRQDILVGLLRLRKCCKNVTC  
ELMGKCSVVRELHVYGTAVPVHGRDADKLQHQGYGTLMEEAERIARREHRSNKIGVISGVGTRHYY  
RKLGYELEGPYMKHLL\*

**7. AT3G49050**

Promoter (2 kb upstream)

CAA AACTTCACTTTTAGGTACTTTGTTGATCTAATATTACATAAATTGCACTGTTCTCAGCTAAAT  
ATGTCTTCTACCAAAGGAAATCAGATAGGCCAAAAATGGATCCAGCCTAAATGTGTACCGGAAT  
GTTTGTATTCCATCTTGAGACATT **CGTG** TGACACAGGATACGAATGGCAACGAAGAGATGAGAA  
AGAAGTGGCGAGATACATCCTAAGAAACACAACAAGTTTGAAGAAAGCAACTTTCTCCACAAA  
ACCCATCGAACCGGTAAAGCTCAAAGTTTTTAAAAAGAGA **CGTG** AGATCCTCAACGAGTTGGCT  
AGTTTGGGCAGGGCTTCAAATCCAAGTATTTTGTGTTTGAATCTATTTAATCTCTCGAGCATATA  
TATATTATATATGGTTTGTGACCATTGGGAAATGTAAACTCTCAACTTTATCAATCGATAGGAT  
GCCAAATCTTGGTTACATTTTGAACTTATACTATTGTAGATATATATTTTTCTAACAAAAGCTGAA  
CTTAGTTTTGAATAGTATGGACTTTCTAGAAGAAATGATATGAATTGATTGCACATAGGCTTTTT  
CTAACAAAAGCTGAATTGGCAATTTGCTACTTAAATGAATTTGATTGCATAATTTATTGTAGTGCT  
TGAAAATTCTGAACTTGCAAGTTCTGTAATAGGAAACACATCACAAAATAATTGCAATTGGTCCC  
AAAGGCGTATAAACTTGTTCCTTCCATGACTCTTTTGACCTCTAGGTAATAGTAAAGCCAGTA  
GATGGAATTAGCAGCTACCAACCTAACTTAAATGAATTTACAGTTGCTATATATGATTTTCTTTTT  
AATATATAATACTAAATTAGAACCAGCCAAAGAAAATTAATTGAGAATTATTCAAAGCCATTG  
TGATTTTCTGTTTGTCAAGAAAAAACTACTTCCTTAATTTTTTTTCTACATAAAAATTTAGATTG

AAATCTACATTAATGTTGAGAATTTACAGTTACAAACAGTTACAGTAGAACTCTATAAATTAAT  
ATTCGGTAAATTAATAAACACGATAAATTAATAAATTATGTTCGATTCCAAGTCGGGTCAATGTAA  
AAATTAACCAAATCGATAAGATAATAAGATAATAATTTTTTTGAAATCTCTTTGTCAAAATAT  
GGTCTCAATAATATCATAAATCAATAATTACTAATCTTAAACATACTTTTAAAGGTAATCTAGTAC  
AATATGACTTTAGTTATATTTGTTTTTTCTTAAAGTTTGAATCTTTCTGAAGTTCATCTCTAATTTTC  
TTTATTGCATCAAAAACCTTTGGTGTTGCTTTTTTGATATGCATCCAAAAGTTGTGAAGAGTTTTAG  
ACGGCATAATTGCTTCCTTACGTCATCAATATTTAAGAAAGTTTCACATTATCGTCTTCAAGTCTTC  
ACCAACATTATAAACAGAAATCACAATTTCTTCGAAAACTCTGAATTTTTGAGTATGCTTCATT  
GCACCTAGATATTCGAGTAGGCTATTGACATTTATTCTATTCCGAAAGAAGATAGTGTTATATTTT  
GCTTAAATATTTCTATAAATTAATAAATATTAATTTATCTGTAAAATAATATTTATTAATTTATAG  
AATAAATTAATTTCACTATAAATTAAGAAAATTTTCATGGTCCCAACATTATTAATTTATAGAATTT  
CTACTGTATATGGAATCTATTCAATAAAATAATATGACTAATGAAAATCAACCACTATTTATTTTG  
ACTAAACAAGTTACACAACACTACTACAACCACAAATTTCTCATTTTTAATTGTAATTGTGTAATGTT  
GATGAACTTTTTCAGTCTAAATCTAGAACTTGGGACAAATTAACAAAAATTAACACTAATTAT  
CTCGAAATTTAACTCTTAAATTAATAACCAAATTTTGTAAAGAAAATAGTATTATTTATATTTTAT  
CTTCTTCACACAACACAACACAGCAAGCTC

**CDS**

ATGTCGATTCTATGTGGTTGTTGCCCTCTTTTAGAATGTGTTTACTGTCTTGGTTGTGCACGTTGGG  
GTTATAAACGTTGTCTTTATACTGCTGGTCACGACAGTGAAGATTGGGGACTTGCAACAACTGAT  
GAATTCGAACCGGTTCTCGGTTTTGTCGTTATATTTTAGCTGTTACGAGGATGATATTCGAAAT  
CCTTTGTGGGAGCCTCCAGAAGGATATGGGATTAACCCTGATTGGTTGCTTCTAAAGAAGACTTA  
TGAAGACACTCAGGGTCGTGCTCCAGCTTATATATTGTATCTTGATCATGTTTCATCAAGATATAGT  
TGTTGCAATCCGGGGTTGAATTTGGCTAAGGAGAGTGATTATGCAATGCTTTTGGATAATAAGC  
TTGGTGAAAGGAAGTTTGATGGTGGTTATGTGCACAACGGGCTTGTGAAGTCTGCTGGTTATGTGT  
TAGATGAGGAATGTAAAGTTTTGAAAGAGTTGGTGAAAAAGTATCCGAGTTATACTCTGACTTTT  
GCTGGACATTCACTGGGTCTGGTGTAGCTACAATGTTGGCTTTGTTAGTGGTTTCGACATCCGGAA  
AGATTGGGGAATATTGATAGAAAGAGAGTTAGGTGTTTCGCTATTGCGCCTGCGAGGTGTATGTC  
GTTGAATTTGGCTGTTAGATATGCAGATGTGATTAACCTCTGTACACTTCAGGATGATTTCTTGCCT  
AGGACAGCTACACCTCTAGAAGACATATTCAAGTCTGTATTCTGTTTGCCATGTTTGCTATGCATA  
AGGTGCATGAAGGATACATGTGTTCCAGAGCAAAAGATGCTCAAAGATCCTAGACGGCTTTATG  
CTCCTGGTTCGCATGTATCACATCGTCGAAAGAAAGCCTTGCAGATTAGGAAGATATCCTCCGGTT  
GTGAAGACAGCAGTGCCGGTAGATGGAAGATTCGAACACATTGTTCTTTCTTGTAAACGCAACTTC  
AGACCACGCCATCATCTGGATCGAACGAGAAGCTCAGAGAGCTCTCAACCTAATGATGGAGAAT  
GAGAAGAAAATGGAGATCCCGGAGAAGCAAAGGATGGAGAGGCAAGAATCATTAGCCAGAGA  
GCACAACTTGGAGTACAGAGCAGGTTAAGACGAGCAGTAACGTTAGATGTACCTCACGCAGAG  
TCAATGGCCTATGAGTACGGAACATTTCGACAAAACCTCAAGAAGACGAAACCGAAGAAGAAGAA  
GTAGAAACAGAGGAAGAAGAAGAAGACACAGACTCGATTGCACCAATGGTGGGTGAATCATCA  
TCATCATCTTCTGTTAAACCACTTACAGGATAAGACGAAACCGTAGAGTTAGTTGGGACGAACT  
AATCGAACATCTCTTTGAACGAGACGAGTCTGGTAACTTGACATTCGAGAAATCAGATTTACCTC  
AATGA

**Protein**

MSILCGCCPLLECXYCLGCARWGYKRCLYTAGHDSWDWGLATTDEFEPVPRFCRYILAVYEDDIRNPL  
WEPPEGYGINPDWLLLKTYEDTQGRAPAYILYLDHVHQDIVVAIRGLNLAKESDYAMLLDNKLGSR

KFDGGYVHNGLVKSAGYVLDEECKVLKELVKKYPSYTLTFAGHSLGSGVATMLALLVVRHPERLGNID  
RKRVRCAIAPARCMSLNLAVRYADVINSVILQDDFLPRTATPLEDIFKSVFCLPCLLCIRCMKDTCPVE  
QKMLKDPRLYAPGRMYHIVERKPCRLGRYPPVVKTAVPVDGRFEHIVLSCNATSDHAIWIIEAQRAL  
LNLMMENEEKMEIPEKQRMERQESLAREHNLEYRAALRRAVTLDVPHAESMAYEYGTDFDKTQEDETE  
EEEVETEEEEEDTDSIAPMVGESSSSSVKPTYRIRNRNRVSWDELIEHLFERDESGNLTFEKSDLPQ\*

## 8. AT4G21390 (B120)

Promoter (2 kb upstream)

GAGGTTTGAGTTTGATTCATCATGTTAACTGAATTTGTAATTCTGTTTGTTCAGGTGTGGAGAT  
GTTGGAGAGAAGACATTATACTAAGCGTTATTGATCCGAGTCTAACCACGGGATCAAGAAGCGA  
GATCTTGAGATGCATACACATTGGTCTTTTATGTGTTCAAGAAAGTCCAGCGAGTAGACCAACTA  
TGGATTTCGTTGCTCTAATGCTCAATAGCTATTCCTATACTCTCCAACGCCTTCAAGGCCGCCT  
TTGCGTTAGAGAGTGCATGCCTTCGATGAATGTTTCTTCTCCACAGAACCCTTATTAATGTCCTT  
GAATGATGTCAGTCTTCTGAGTTATCTCCTCGTTAGGAAGCTTAATCTGCATATCTTTTAGTTTC  
TTCAATGATGGATTTTGTGTGATTTTTAGACAGCTTGGCTTCATCTAGCTTTTGAACGAGT  
AGAAGTTATAGCTTTTCTTTAGTTCTACACATTCGTCGTTAATGGTAGATTTGTTTGCAAATTC  
GATTTTACTGTGTTTTAAACATATAACATGAAATTTAACTTAAGAAAATGAAAATAGTATTAGA  
CTTTTACTAAGAAAAGCTTTTCTACTTTATCCTACACATGAAATGCATACACATTGGTCTTTTCAA  
AGCAACAAATCAATGTTAAATACAGTTTTCTTTATCTTAACTCCTAATAATGTAGCTATAGAATTC  
ATGACTAAGCATTTGGACCCTTGGAGCATTTTTAGATGGAGATGGGTGTTTGTTCCTTATTAGG  
TTTTGTTGCCTAGTAGCCACATTCTCTCAGTTAACTAATACATTTGTAAATTTCACTTGTAATCA  
ACTAATCCACCAAATGAATCAATAATGTAACTCCAGAATCGATCTGGCATTGTATGAGTATCAA  
TATATGCTTTAGTGCCACTTGCTAGTGAATCCACTTGAGGTTTGGCTGCATCGATATTAGATATA  
AATACTTAAGCGTCATGCAAAAAAAGATTACTAAATAATTGTAGGGTTATTATGGGATTTTAGG  
CGAGCAAACAACATTTAACTTTGAAGGAATACAATTTGAAATATCAAGATACGTAAAATATGT  
CA **CGTC** CAATAAAATAAAGAGAAGACCCATCCAAATCAAGTGTGCGATACTTTGACCATATGAG  
TCAATGTGGCGCCAAAGGCAACAAGCATATCTAATCTAAGTATTATATAACTAAGCAAATATTC  
CACTAACTAGTATACAAAGCCAACCTGCTCCACTAATGCCTGACATACTTATTTATTTCAAATT  
TGGTAACCACACCTATAGCTTATACATTTTCTTCGATGGCCTTATACAATAGGAATATACTATTAC  
CTTCTCATTGTTCTTATTATCATCAACCATTTGATAAATCCTCATCACTCTTAAACATTGACTATGA  
ACTAAGGACGTCAGAAGTAGTCCATACAAGATATGAATGGTTGGATCGTCCTAAGTCATTGTATT  
AATATACGTTTCTAATCAATGGAACCTATATAATTGTAATATAATTTTACTAAATCATGTAACCT  
GAAAACCTAACTTTCTTTCTTAATAAAAATTGAACCGCTAAAGTATCTAATCCATCATGTGTCAA  
CTGACACCGTCCAAAATCCTCTTAGAGATGTAAGAAAAAGTTTCAAAAACAATTAGGTCAGCCAC  
CAATCACATATTTCTATGCAGGTTGTATAATCTTGAAAAAGAACAAAAAAGTAGATGACAAAA  
AAGAATAAAAGACAATAATAATAACCTTATAAAGATGATAATAATTCAAACAGTTTGACCT  
TTTTATTTCAATTCTCTGGTCCAACCTTCCAACCTGACGAGACAAAAATATAGAACTTCTCAACA  
GCAATAAACAGCAACCTTTCTTTTTGTATCCCTTCTCCTTTGTCACCTCTCCTTACTTTTTTAT  
CAATAGGAAGTTCCGCCATTGTGACAGAC

## CDS

ATGAGATCTTCCGCAAACCTCACTTTATCTTTCTCTCTTCTTATACTTCTTTCTTTATGAATCTTC  
CATGGCTGCAAATACAATCAGAAGAGGCGAATCTTTAAGAGACGGAATCAATCACAAACCTTTA  
GTCTCTCCACAAAAGACATTCGAGCTAGGTTTCTTCAGTCTGGAAGCTCTACGCATCGTTTCTTA  
GGGATTTGGTATGGGAACATCGAGGATAAAGCTGTGGTATGGGTAGCAAACAGAGCAACTCCAA

TTTCAGACCAATCTGGAGTTCTCATGATAAGCAACGATGGTAATCTCGTGTTATTAGACGGGAAG  
AACATCACTGTCTGGTCTTCAAACATCGAGTCAAGCACTACCAACAACAACAACAGAGTCGTTT  
CTATACATGACACTGGGAACCTTTGTTTTGTCTGAAACCGACACAGATAGACCTATTTGGGAGAGT  
TTCAATCACCCAACAGATACCTTCTTACCCGAGATGAGAGTTCGTGTGAATCCACAAACCGGAG  
ACAATCACGCTTTTTGTCTCATGGAGATCTGAGACTGATCCTTCCCCTGGTAATTACTCATTAGGGG  
TTGATCCCTCTGGAGCACCAGAGATTGTGCTTTGGGAAGGGAACAAGACGAGGAAATGGAGAAG  
CGGGCAATGGAACCTCTGCGATTTTTACCGGGATTCCGAATATGTCTCTGTTGACGAATTATCTTTA  
CGGATTCAAGCTTTCATCTCCTCCAGATGAAACAGGTAGCGTGTACTTCACGTATGTTCCCTCAGA  
TCCATCAGTGTTACTTAGGTTTAAGGTTCTTTATAATGGAACCGAAGAGGAATTGAGATGGAATG  
AGACTTTGAAGAAGTGGACTAAGTTTCAGTCTGAGCCAGATAGTGAGTGTGATCAGTATAATCGT  
TGTGGCAAGTTTGGTATTTGTGATATGAAGGGCTCTAATGGAATCTGTAGCTGTATTCAATGTTAT  
GAGCAAGTTTCTGTTGGGAATTGGAGTAGAGGTTGTAGAAGAAGAACACCGTTGAAGTGTGAAA  
GGAACATTAGTGTGGAGAGGATGAGTTCCTTGACTTTGAAATCTGTGAAGTTGCCTGATTTTGAA  
ATTCCTGAACATAATCTTGTGATCCTGAGGATTGCAGAGAGAGGTGTCTGAGGAATTGTTCTTGC  
AATGCTTATTCTCTTGTGGTGGTATTGGATGCATGATTTGGAACCAAGATTTAGTGGATTTACAA  
CAGTTTGAAGCTGGTGGTCTTCGCTTCATATCCGTCTTGCTGATTCCGAAGTAGGGGAGAACAG  
GAAAACAAGATTGCAGTGATTGTGCGGTTCTTGTGGTGTGATCTTGATAGGAATCTTTGCTCT  
GCTTCTATGGAGATTCAAGAGAAAGAAAGATGTTTCAGGAGCATATTGTGGTAAGAACACCGAT  
ACATCGGTTGTTGTTGCTGATCTGACCAAGAGCAAAGAACTACTTCAGCGTTTTTCAGGATCAGT  
AGACATAATGATTGAAGGGAAAGCTGTTAACACATCCGAGTTACCTGCTTTTTCTCTGAATGCTA  
TAGCCATAGCTACTAATGATTTCTGCAAAGAAAATGAGCTTGGAAGAGGTGGATTCCGACCAGT  
CTACAAGGGTGTCTCGAAGATGGACGTGAGATAGCTGTGAAGAGATTGTCTGGTAAATCAGGA  
CAAGGAGTTGATGAATTCAAGAATGAGATTATTCTCATAGCGAAGCTTCAACATCCGAATCTTGT  
GAGATTACTTGGATGTTGCTTCGAGGGAGAAGAGAAAATGCTTGTATGAGTATATGCCTAACA  
AGAGCTTGGATTTCTCCTCTTTGATGAAACGAAACAAGCGTTGATAGACTGGAAACTGCGGTTT  
TCGATAATTGAAGGGATTGCGAGAGGATTGCTTTATCTTCATAGAGATTCAAGATTGAGAATCAT  
TCATAGAGACTTGAAGGTTAGCAATGTGTTGTTAGATGCAGAGATGAATCCAAAGATCTCAGATT  
TTGGTATGGCAAGGATCTTTGGTGGTAACCAAAATGAAGCTAACACGGTTCGCGTTGTTGGAAC  
TACGGATACATGTCTCCTGAATACGCGATGGAAGGACTTTTTCTCGGTGAAATCCGATGTTTACAG  
CTTCGGTGTCTTGTGCTAGAGATTGTAAGTGGGAAGAGGAACACAAGTCTTCGATCTTCTGAAC  
ATGGAAGTCTCATTGGTTATGCTTGGTATTTGTATACTCATGGGAGATCAGAGGAGCTTGTGGATC  
CTAAGATCAGGGTCACATGCAGTAAGCGAGAGGCCTTGAGATGCATACACGTAGCGATGCTATG  
TGTTCAAGATTCCGCTGCGGAGAGACCCAACATGGCTTCAGTTTTGCTTATGTTAGAGAGTGACA  
CAGCGACGCTCGCTGCGCCTAGACAACCAACGTTTACTTCCACCAGAAGAACTCCATTGATGTC  
AACTTTGCTCTTGATTGAGCCAACAATACATCGTTTCTTCTAATGAGATCACTTCAACGGTTGTT  
CTTGGACGATAA

**Protein**

MRFFRKTSLYLSLFLYFFLYESSMAANTIRRGESLRDGINHKPLVSPQKTFELGFFSPGSSTHRFLGIWYGN  
IEDKAVVWVANRATPISDQSGVLMISNDGNLVLDDGKNITVWSSNIESSTNNNNRVVSIHDTGNFVLS  
ETDTRPIWESFNHPTDFLPQMRVRVNPQTGDNHAFVSWRSETDPSPGNYSLVDPSPGAPEIVLWEG  
NKTRKWRSGQWNSAIFTGIPNMSLLTNYLYGFKLSSPPDETGSVYFTYVPSDPSVLLRFKVLVYNGTEEL  
RWNETLKKWTKFQSEPDSECDQYNRCGKFGICDMKGSNGICSCIHGVEQVSVGNWSRGCRRRTPLKC  
ERNISVGEDEFLLKSVKLPDFEIPHNLVDPEDCRERCLRNCSCNAYS LVGGIGCMIWNQDLVDLQOF

EAGGSSLHIRLADSEVGENRKTIAVIVAVLVGVILIGIFALLLWRFKRKKDVSAYCGKNTDTSVVVAD  
LTKSKETTSAFSGSVDIMIEGKAVNTSELPVFSLNAIAIATNDFCKENELGRGGFGPVYKGVLEDGREIAV  
KRLSGKSGQGVDEFKNEIILIAKLQHRNLVRLLGCCFEGEEKMLVYEYMPNKSLDFFLFDETKQALIDW  
KLRFSIIEGIARGLLYLHRDSRLRIIHRDLKVSNNLLDAEMNPKISDFGMARIFGGNQNEANTVRVVGTY  
GYMSPEYAMEGLFSVKSDVYSGVLLLEIVSGKRNTSLRSEHGLIGYAWYLYTHGRSEELVDPKIRVTC  
SKREALRCIHVAMLCVQDSAAERPNUMASVLLMLESDTATLAAPRQPTFTSTRRNSIDVNFALDSSQQYI  
VSSNEITSTVVLGR\*

## 9. AT2G43110

Promoter (2 kb upstream)

GATCTTTTCCATGCTCATATCCATTAAGACTTGAGTGTCCGATAGTAGAACAATACTTCACTCTTA  
TTTTGTCTCTAAGACTCCTTTTTTTTTTCCTTTTTTGTTCTATTTGTTTTGCAGGTGTCAATGGAAG  
TGCATGAGAGTCACTTCAAGGATCTTGATCCAATAATAAGAATATGTAATGTTTTCCAAAAGCTTA  
TGAACCTAATCTATGTTTTATGAATATATGACTATCGGCTTTAGTCTTCAGTATCAGTTTCTTGT  
TTACATTTGGATGTATCAGCTGCTAAAAAATGCATAGTTTCCCATCCCATTTGAAACGACGTTTT  
CTCTCATGTCTTCCACTAATAATCTTCTGGTCATGAGAACAGAACAGGAGCTCTGTTTTTCTCA  
CACAATGATCGAACACACTTTTGTATATAGTATAGAGAAATATTAACACTTCTTTTTAGGCATCC  
GTATCTAGAGTCTTTGTTTCACTGTGACCTACCTAAGTATATCAAAAACGCACGTTTGGAAATTCTGA  
ATGGCACTTTCGTAAATAGGAGGGTACAAACATTTCTCCTTTTAAATTGTTTTCATCGTCAACTCT  
CTCACTCACTCAACAAAGTAAAGAAACAATGGCGTATTCTCTTCTACATTTCCCAAGCCTTAC  
CTTGCTCGTCAACCAAACTTCTTCTCCTTGGCTACCTTCCGATCTCCTTTCTTAAGATTCAATGG  
TTCCACTTCTTAATCCCCTCCTCTATCTCCATCACTTCACTGACATCCTCCCGACCATCATC  
CCAACCTGCGCCCTCAGAATCCGACTCTAACGAAGCCCTAGCCAACACAACCTTCCACGGCC  
TCTGCTATGTCTTGAAAGACAACATAGACACCGACCAGATCATCCAGCAGGAGCCGCTTGCAC  
CTTCCCATCGAACCAAGAGCTGATGAGATCGCCGCTCACGCTCTCTCTGGTCTACCAGACT  
TCCACAAAACACGGTTCATTGAGCCAGGAGAGAACAGATCAAAGTACTCAATCATAATCGGCGG  
CGAAAACCTTGGTTGCGGATCGTCACTGAAACATGCTCCGGTCTGTCTTGGAGCAGCTGGAGCTA  
AAGCCATAGTTGCTGAGTCTTACGCAAGAATCTTTTTCCGTAACCTCGGTTGCTACAGGAGAGGTG  
TTTTCCGCTCGAGTCAAGAGTCTGTGAGGAGTGTAAAGACAGGAGATACGGTGACGATCG  
AGCTGAGTGATAGTGGTGGTTTATTGACTAATCACACGACCGGTA AAAACTATAAGCTGAAGTC  
GATCGGTGATGCTGGACCGTTATTGATGCTGGTGGTATTTTTGCTTATGCGAGGATGATGGGAAT  
GATCCATCATTAGCTTAATCCTCTTCCATAACCATGATGGTGTCTTGTATGCATAACTATTTGAT  
GAATATTTGTGTTTTAGAGTTTTCTATTTTCTTAACTTTTTTATGTTTGTGTTGATTGGTATTGTTGT  
GTTACCTAAAGAATAAGAAATCAAAAAGCAAAATAGACCGACATGTTCCAAGATATGTGAATATG  
GTGAGTGTACTAAATTATGCGAATATTGTTGTTGCAACCTTATTTCTTCCAAGTTGGGCATCAA  
TTTTCCTTTTTGGCCTTAGTCTTCTTTGTTGTAATTTAGTTTGTGTTTATGTTGGCCATT  
TCTGTAGGGTTTGGCCGTTAAGTAAGTACCATGTAAACCCAGAAAATTTACAACGAAAACCCCT  
TAGCAAAAAGTAATAATTCCGTTGGTAACTTTTCTCATTGTAGTACATGGCATAATTTACTTACT  
CTACTAACCAATTTGGTTTGGTTATTGAAAATTTGGCGGTTTAAACAAACCGATATAAAATAACC  
GTTAAGCGGTA AAAAGAAAGGACATCGCTAAACCTAAATTTGCGACTCCTACTTTATAACGCCGCT  
CTTCTTCTCCATTGTTTGTATACTCT

## CDS

ATGGCAACTACAGAGCTAAAACCCTCCGCCGTTAAAACCCTAAAAGAAATCGAAGACCATCA  
CATGGTCCGAAGAAAGATTTGAAGAAGAAGAAGACTAAGATTACTAAGAAGACTAAGAAGTCCG

AAAGCTCCACCTTTGATAAGACCATTGAGAAGAGTAGAAGTAACGACCAGAAAACCGACAAC  
GACGAAGACGAGCAACTGTATTCCGAACCGGTATCGGCCTCTGAGCAGCTCAACTACTTTTTGAA  
TCATCTTGACTCCGCCATTGGTATCAAGGTTTCTTCTTTAGAGCTTGAACCCATTAAGATACGTG  
TATAGTTGAGTTATCTCAAGGGTTGGATCAAGATGTAAGCAACTTGGGAGAACATATAAAGCTTT  
CTTGTGGGTCTTCATGGAGAGAGACTCTTTGTGAAGGAGAGTCACTTGAAGGAAAGTTGAACC  
GGGAAACCCATCTGTTCTTGTATTAGTTCCTCTGCTCTGAGATCTTTGGAACTTCTAAGGGGTTG  
CATTCACTGACTAAGCAATGTCCAGCAGTGAAGTTGTTCTCAAAGCATTGAAGGTTGAGGAACA  
GGTATCTCTGTTGAAGAAACGGGTTAATATTGGGAGTGGCACACCAAACAGGATCAAAAAGCTA  
GTCGACATAGAAGCTTTAGGGCTTTCGCGTTTAGATATGATTGTGATCGACATGCACCCAGATGT  
CAAGGGATTTTCTTATTACATTGCCTCAAGTCAGAGATGAGTTTTGGGATTTGTATAAAAAGCTG  
CTTCCACCAGAGAGTCTAGAAGGAAGACTTCGTATCTGCATGTATGGTCCAAAGCCTTCTCCAA  
ACCTAAAGAAGAAGAACAAGAAATAA

### Protein

MATELKPSAVKNPKRNRPSHGPKKDLKKKTKITKKTKSKAPTDFDKTIEKSRSDQKTDNDEDEQ  
LYSEPVSAEQLNYFLNHLDSAIGIKVSSLELEPIKDTCIVELSQGLDQDVSNLGEHIKLSGSSWRETLCE  
GESLERKVEPGNPSVLVISSALRSLELLRGLHSLTKQCPAVKLFKHLKVEEQVSLKRVNIGSGTPNRI  
KKLVDIEALGLSRLDMIVIDMHPDVKGFSLFTLPQVRDEFWDLYKNCFHQVRVLEGRRLRICMYGPKPSPN  
LKKKNKK\*

### 10. AT3G19850

Promoter (2 kb upstream)

ACATCAAATTTTAATGTTTCGTAC **CCCG**TTTCGAATGATTGCGCTCTGTTGTAATATTGAATTAT  
AATCAGTTCGTTGATGAAGCAAATAAATCATGGTCTTGAACAGTGTTAGCCGACTAGTTTTATG  
TCTTAACCATTTTTTCTTGCTCTCTAGAGCACTGCTTGAACATTATGATATTGTATAATTTTTGGC  
ATAGAAATGTAAACTTGACAAAATTTTTGATGATTACTTAAGTTTTGGTCTCGAGATTCTAAAGAT  
TTGCACAAAAAACAAGGATTGTTCTTCTAAAAGAAAAAGTTAAATCGAAAAGGACACAAAA  
TTTATGTAATTTTATTGTATCCTCTTTTTGGGCTAGCTTTAGTCGATGAGGCCAAATGGGCCTGTTA  
ATTATTTATTTTACTTTAGTATTTTTAAGTGGCTTCTTCCTTTGGGGCTTACATTTTTGTTGGTC  
CCTGTAATAATCCTGTTAAAGGGCTTAAATACTAGAGCACAAAAATTTAAAACAATAAAACCTA  
AATCCTCTCGTCGCCTTCGTTTCTTCGTCCTCCACTCCCATTGATGAACCTCAGAAGACTTTG  
CCCTAAACCTCACATACTATTACATAATTTGTATGGATATTAATGATATTTTATTTGGAACTTC  
ATTTTAATAATAAATAAAAATATTATCGGAAGTTAGTCATATTTTTTTATTTGTAATCAAAGA  
GTCGTAATGTATATCGACATTGGTGTATCTTTTTTTATAACATTTTTGTTACATATATCGTTTTCAA  
TTACATATATTTACATGGCTGGATTTGGATAATGATGAAAAGCAAGTAGTCGACTTTATTCACA  
AACGTTAGAGTCATAAAACCTACCCGGCCATTACATGCAATGAAAGTGAAACTCCCAACTT  
TACAAGCAACTGATATATAAATATTCTACAAATAAAAAGGGAAGAAAATCTTGAAATTACATG  
GAAGTGAATAATAGTATTACGAATTTATAATGTAATGCCAAGAAAGGGAGAATATTTATAATTC  
ACATAAAAACAAAGGGGGCACATTCATATATACGTTA **CGTG**GTATAAAACAGCATATAAATAC  
AGAATATATATATTACAACCTGAGTAGCATAGTCCTGAGCTATTGACAAGTCATAAGTGAGAGT  
TCATGAAGCATCATTTTCTGTGCTACTGGAAATATATATTTGATATTAGT **CGTG**ACCTATAGTTCA  
CTGTCTAAAATGTAAATCTTATTTGATTTGATGCAATACATTTTTACTTTACCCCAATAACCTGA  
ATAATGTTGGTCATAATTATGAATTATTCTCAACAAATTGTAAGCTATTTCCCTGCTGTTTGTTC  
CCACCTACTGATTTTTTTTTTCTTCCTCTAACACCAATTTTTATTTATTTTTTTGGCCATCCTGATCA  
ATGAAGCATTAAAGGAATCAATCTTTCACCTGGTATTTTTTAGTAACAATAACAACGCCTCGTC

ATATTGATTTGTGCTCTGCACACAAGATTATATGGATTTCAAATAAACATGCAGTCAATTAATG  
CAGTTTATATAACTTTTCTTAAGTTCGATGTTAGAAAAAAGGTTTCTAATGTAAAGAAGTAAACT  
ATGCATGTCAAGCTAATTGCTCCAAAATTAATATCATATAGTACATTTTCGATTAAGCAATGAATC  
TTATTATCTAATACCAAAAAAATAACAATAACGAACAATAATTTTTTCATTACAAACGGCAAC  
AAATTATTACATTTTCACTATTTTAGATGGTCTACACACTAGGGTTACAAGTTGGTCCATGCGACC  
AGTTTATACAATTTTTCGATGACGTTTGTATATAAGTTCCTTTTGCATAAATTTATATGAGTTATAA  
AGGATGATAAAAGAAAGTGTACATTAGATAATTGAAATAAAGACGCCGAAAAAGAGATATATA  
AATAGCCGTTTCCATGTGATAACTATT

### CDS

ATGTCTCTTTGCTGTGATCTTCAAATCAATCTCAATAACCAATTTACTTTCTTCGTCAATCAGGATT  
TGATCTCAGAGTACTCAGGCTTCTTGAGGAAGATGATAAAACAGAGCAATAAGAAGAAAAAGA  
ATCACAAGAACAGTAGAATCATCATCGAGGTTGAAGATTTTCCAGGTGGGTCAGATGGGTTTCGA  
CTTGGTTTTAAGATTCTGTTATGGTGGAGGAATCTCGATAGATGTCTCAAATGTGTCCATTTTGA  
TTGCTCTTCTGTCTTCCTTGAGATGACAGAGAACTCTGTTCCCTCGAATCTCTTGCTTCGAACAGA  
GAAGTTTCTAGAAGGAATGTTCTACTGGTCTGGAACGACATCGTATTGTGTCTCAAGAGCTGCG  
AGCAAGTGTCTTACACGCTGATTCTTACGGTCTTGTTGATAAGCTTGTTTTCGGGGTTTTAGCCAA  
AATCCCTCAGAATTCAGACGTGAGTCATGTCTTTTCATCATCTCTCCGTCTTCTCTGCCTCTGCC  
TCAGCCTCCTCTCAGTCGCCGGAGACGGCAATGATTAGGTCGTATTCAGACAAAAGGTCTACTTC  
GAGGTCTTTTTCTTGACAGGACAAGTAACGAGTGGTGGTTCGACGATATGTCAATTCTCGGGCCAA  
AAATCATTGAAAAGCTGATAAATACACTTGGTGCATGATAAGAACAATGACAGCTTGGTCTCT  
CACAAAATTTCTTCTCATTACCTCAAGACAAAGGTCCCAAACAAGTCAACCAACAAGCTCGAG  
TATTCAGGTTTAGCTGATACAGCGGTTCAAGGAGTGGTTTTTCGCAGCGAAAACCGCGTTTTTCATG  
CAGAAAAATGTTCTGGGTTCTGCGAGTTTTATCGGGATTTAGCATAAGTAAAGAATCAAGAATTG  
GTTTAGAGAGGGTTATAGGAGAAATGCTGGATCAAGCAACACTTGATGATCTTCTGATACCAGCT  
GGAGGAAAAGGAGAAAAAGGGGTTTACGATGTGGATTTGGTGATAAGATTACTCAAAGTGGTTG  
TAAGAATTGGAAACACAGAAGAAGGAGATCAGAATTTGAGAATGAGAAGAATTGGGAAGTTGA  
TTGATAAGTATCTCAGAGAGATATCTCCAGACCAGAATCTTAAAGTGTCAAAGTTTCTTGAAGTT  
GCAGAGAGTTTGCCAGATTCAGCTAGAGATTGGTTTGATGGATTATACAGAGCCATTAACATCTA  
TCTTGAGTCTCATCCGAAACTATCATCCGAGGATAGAACAAAATATGTCCGATGTCTAAACTACA  
AGAAATTGACATTGGACACATGCAAACAATTGCAAAAAATCCCAAGATCCCTCAAATATTGC  
AGTTCAAGCACTCAAGTCACAACAATTATCAAACGAGACTCGACCACACTCAAGAGAGGACAA  
GAACAAAGTAAACAAGATCTGGAATTCACGTAAGTACTTAGAAGAGAAACCAATACTGGTGTGT  
TTGAAAGGTTTTGATATGTCGGAGAAGTTTGAAGATGATCTAATGATGAATTTGGAGAGGAAGCA  
ATGGAATAATTCTGAAAAAGTTAGTAAGGAGAAGAAGAGTGAAGTAATGTCAAGATCTGTGAG  
ACATGGACATACACATTCAAGTTCTAGTTTTCCAAGGCTTTGTAA

### Protein

MSLCCDLQINLNNQFTFFVNQDLISEYSGFLRKMIKQSNKKKKNHKNSRIIEVEDFPGGSDGFDLVLRF  
CYGGGISIDVSNVLSILHCSSVFLEMTEKLCSSNLLLRTEKFLEGMFYWSWNDIVLCLKSCEQVFLHADS  
YGLVDKLVFGVLAKIPQNSDVSHVFSSSPSSASASASSQPETAMIRSYSKRSRFSRFSRCSNEWWFDD  
MSILGPKIIEKLINTLGAHDKNNDLVLTKFLLHYLTKVLPNKSTNKLEYSGLADTAVQGVVFAAKTAF  
SCRKMFVWVLRVLSGFSISKESRIGLERVIGEMLDQATLDDLLIPAGGKGEKGVYDVLVIRLLKVFVRIG  
NTEEGDQNLRMRRIGKLIDKYLREISPDQNLKVSFLEVAESLPDSARDWFDGLYRAINIYLESHPKLSSE

DRTKLCRCLNYKKLTLDTCKQLAKNPKIPPNIAVQALKSQQLSNETRPHSREDKNKVNKIWNSRKYLE  
EKPIVLVCLKGFDMSEKFEDDLMMNLERKQWNNSEKVSKEKKSEVMSRSVRHGHTHSSSSFPRLC\*

### GmCAMTA12 regulatory Network

#### 1. GLYMA19G40910.1: (GmNIP 30)

Promoter (2 kb upstream)

TTAGAGTCTGAAGGATTAATCAAAGCGCAATAATAATTTGTGCTTAAGTTTTGCTCTTTGACGACC  
TCTCTTCTAGTTTTAGTCTGACTGACATCAACATCAGGGGAGTATCGAGTAAAATAAGGAGTTA  
TAACATTAGTTAGTGGTTTAGTAATTCATGTTTATGTGTCATTCCCTTGTAACAATCTATCAATAGT  
AGCATCGCCTAAGATTAAAGGGTGGGGAACCTTGTACTAAAACTCATTATAAAGCCTACACA  
TACGTCCTCTTAGATAAACAAGCATCTAGAGGAGAAAACATATAAAGTTCCAACAAGAAAGAA  
AAGTTTGTTGATTTTTCTTCTTCGTTGTTTTTATTACTTTTATTGTTTTGCTTCTCATGTTTCTAGT  
GAATTATTATTTGTTGTCCATAGCCCTTCTTCATTCTATCATCTAACAATTTGCTGAGTTTTCTTG  
ACATTATTGAATCAATGCAAGGCTATGAAAAATCATCGTCAACACAAGCCTCTAAACCTTTCCT  
GAAAAAAAATTATAATGTTTACATTAGGAGATTGAAATAACACATTTCTTCTTACAACATGAT  
TTTTTTTTTACATTTCTTGCAATTTGATTAAAGGTATTAATGAAAATTGCCAAATTTAGCATTAAAGT  
AGATAGAAAATAAACATGATTACAACAACAACAACTCATACTTTTGGTTCACAATTTTTAGGA  
TAAATGCATCCTAATGACATATGCTTTTGGCTATGCCCCATAGGATGTCAAATTTTCATTTTTAGA  
GAAAAGATATTGTTAATCCTAAGCCCTAGTTCCTTAGCTAAGGCTCAACAATGAGATTGGTTTTTT



TTTTTGCCCTACTTGAGAAATAACTGACTCATCTTTTTTAAAAGTCTCATCAGGTGAAAAAACTCA  
TTGTGAAGTGTAATCTAGATCATACCAATAATCATAGAAAATCTCATATGTGACACCTTCTACTCC  
TCACATATATATATTAATAATAAAAGGAATAAAAAATTAGAATTAATTTAAAAAATTTAAAAACA  
CATTTAAATACAAGCTTTTCGAAAGGATAAAAAATATAATTTATATGTTAAAAAATTAGTTATAA  
TATAATGTATTTATTTAAAATATTTATTATAAACCTAGTTATATGAAGTCAACATTTAAGATATTA  
GTTAGTTTGAAATCTTCAATTCACGTATTATTTATCCTTTTCCTTATGACCATAGATTTTTTTTATATC  
AAAACACTAAAATATTTGTAATATAAATAGTGATCCAAGTGTTTTAAGTGTTAGAAGTCCCATAT  
CTATTTTTTCCAAACATTTTTACCCCTTCAAATATAAATCTCTCTCTGCAGGTCTCGTATTTGTTTC  
ACTTGTCATCTCATGAGCTTACACTTCCCCTAAAATGGACAATTGGCTAAATTATATCTCATATGT  
GAGATTTTTTTCTCCATCCACAACCTCCTTGTCATCAAGACTTTTCAAAGATTTATCATATGTTGTGT  
GATTTTCTTCATCATTAAACATCCAAATTGAGTTCTCTATAACGATTCTCGAATTTAATGACTATATC  
ATTTGGGTTCTTAATCCATTAAGAATCTTGAGGTTCTCAGGCAATGTTGGATCCTCTTCC  
ATTGGTGTAATTATTTATCTCGAGAATACCTTTGAGATGTATTTGTGATGAAATATTGACATCCT  
TTAAGTGCAGGAAATGAAATGAAATCCAATTCAACAATATAATAAACATAAATGAGATGTAAC  
TTTTGTATGTGTGTTCAATAATATAATCATCTTAAATAAAATGGTAAACATTTATTATTGAAGAAT  
TTATGCCAATACAAGTTGACGAGACATTTATGATGAAGGTAATGTCGTTTTTTTTAAAACATACTA  
AACCAATAGGACAATAAAAACATGATGTTAGTATTTATTTATTATTTGTAGTTGGATTATTGTTT  
TTGTAACAATTTATAGCTGGA

CDS

ATGGATGAAGATTCGGATCGTCCTATCAGGATTATGAACTTCGTCTCCGAAGACCAATTGGTAGA  
AGCTAAAAAACAAGAGGTGAACGAGTTGAAGACGGCACTGCCAGAGGGATAGACCTCTCTA  
CGAGATTCTAAAGGAGAATAAGGATAAAAAAGATGCGGAATTTAATGAAAGGTTCAAGCACAG  
ACCTCCTAAAGCTTTAGACGAAGATGAGACTGAGTTTCTTGATACTTATGAAACAACAAGAAGG  
GAATATGAACGACAAGTGGCAGATGAGGAAGCCCAACAAATCCGAAGCTTTCAAGCAGCGGTG  
GAAGCACAGTCCAACATCGTGCATGAAGTAAAGGAAAAAACTCCATTACCTGTCGTCCAGGAAC  
AGAAGTCTGCTGGAAAGAAGAATCCAGCCTCTGGCCATTAGGCATGATTATAAAAGTCAAGCC  
TCAAGCTAAAAAAGCCAAGGTGGATCAAGGAAATGCTGAGGAAATTTCAAAGGCAGGAAACAC  
TCCTGTGAATGATAAGAGTAAGTCGTTGGAAACAGTACAGCCATTGAATGGTGAAGCTGATAAG  
TCCCAAGTTGTTGCCCTAACTGGCCTTGTTTCGTACAGTGACGAAAGTGACGAGGACTTGTAATA  
ATCACCTCGGAA

Protein

MDEDSDRPIRIMNFVSEDQLVEAKKTRGERVEDGTAQRDRPLYEILKENKDKKDAEFNERFKHRPPKA  
LDEDETEFLDTYETTRREYERQVADEEAQQIRSFQA AVEA QSNIVHEVKEKTPLPVVQE QKSAGKKNPA  
SGPLGMIKVKPQAKKAKVDQGN AEEISKAGNTPVNDKSKSLETVQPLNGEADKSQVVALTGLVSYSD  
ESDEDL)

## 2. GLYMA12G15430.2: (GmPLA 1-IIId)

Promoter (2 kb upstream)

TGGCTTTTCTTAAAACAATTGTGCTCACCTAGGTCAAGGCCAAAATGACTCTTCTTGAAACTAG  
AGGTTTTTTTCGCAAAACACTTATTAGAACCCATTTTTCTTCTTACAAGGCCAAAAGCATATTTT  
CTCTTATGTCTATATTTTAAAAGGCTAAAATAGAATATTTATTATTAATAAGGTATATGCATAA  
ATAATAATAAAAAATAGAATTTGTAACGGTATAATGTGCATATAGTTAATATCTTGTTGTTATTCT  
ATATATGAGTAGTGGTACATGAACAACCTCATAATTTTATACATTTTATCAATACCTTTATTTTTCT  
TTATCTCTCTTTTTATCACATCATAAACCTTATCATAACAATATGTGAATAGTTAATATCTAGATGTT  
GGATAGCATATTAATGTCTATCAAATATTTTTCTATTATTTGAGACAAGTAGGTGTGTGGGAGTCA  
AATTATCCTTCAAATTAATCACCTACAATAAATGCTAATCACTAATCAATTAATATAGAATATT  
GAGTAGATATTA ACTATCCACACCCTGATCAAGGATTGAAACGGCATAAGCAAAAATTAGTGTA  
AAATTATGTTTTTAGTAATATACAAAACCTTATTATTATCATCTCTGCCCTCACCATAAAGCTTTCTC  
ATCTTTTTAGAGTAAAAGTCTTTTTTTTTAAAATAAAAAATTATGGCCACAAATTA AAAATTCTATC  
CACTAGTGTCTATTGATAAGGAATTCATTTTGTCTTGACTAGGGTAAAAGCAAAGTAGCTATGTCT  
TAATCTCGATATAGAAAAAATCAGATAGGCTTTCGCCTTCTTTTTTCCGTCCAACGAGGTAGTCT  
TTGGAGAATTATTCCTAATAATATATATATATATATATATAAAAATTA ACTAATTAAGAATATA  
AAATAATTTACTACGAAACCTTTTTAACA AATTGAGTAATGAATAGGTTAATTGTTTTTTTTATAT  
GTAAGTTAGTATTTTTTATTTTCGGTCACCGTAAGTTTATTATAAATTTATGTTTTTTTAATTTGAT  
TTTTGTAAGATATTTTTATTTATTTTAATTCGTGAAGATATTTTTATTTAATTTCTGTAAGTT  
TACATTTTTTAATTTTAGTTTCATTTTAACTTTCCATTTATACTCTTCAA AATTTATATTTATAGGA  
ATCAA AATTA AAAAAACACAAATTTATCACACCAA AATTAGAAAAAAAATAACTTACACGTATC  
AAA ACTGAAAAATATACTA ACTTACCGGGGGAAAAAAGATATTTAAGGCTGATGAATATAATCT  
TGTTAACGCTAATAATGAGAAAAA ACACACACAGTGATTGACTAAGAAAGAAAGCCGAATAA  
TGTTTTAACACGTTAAAGCATTTCCTTTATTTTAGATAACATTTTCTAATTATTTGTTAACTTTTATT  
TTGTAAGGCATTGTTTTATAGGAACGTTCTATAAATAAATCTTCTTAGTATTTGATAAAAAAAA  
TATCGAATGCCTTGAACCATAATAAGCATATTCAAA ACTTATCTAGCATAACTGCATAAGAGAAT  
TAATAGAAGGATGCAGTAAACTGTA AAGGGATTTAAAATTATTATTAATGAATTTAATTTTCAC  
ATATTATTAATATATATTTTTAAAATCATCTTAGTTAAATATAATTTAAAATAATTATTATAAAA  
AAATTC AATAAACTTACATAAGTGATATATATCATCATTTTTTTTATAAGTACAATGATATCATCA  
TTTGTA ACTAAATAATAGTAAAAAATACCTTTTTTAAGAGGTCAGATATATTTTCACTTGAGAT  
ACTTCAACTAGAGTCATGGTGATTATTATGTCAACAATGTTCCCTCTGTCAGTATTAAGAATTTGA  
CCTCAA ACTACTAATTA AACCAA AATAATCTAACTTTATTCATCGAGTAATATCTATTA AATAA  
CCGATGGTAAAATCATTCC

CDS

ATGTCGGGTTGGCTCACAATCTACACGTCTGACAACCCAAAATCCCCCTTACCAAATCCAGCGC  
AAGAACGCAGCTTCAAGCCCACGTCAAATCCCTCTTACAACATTACAGCTCTGAGAACCCAGC  
TTGGTCATCGTGGGGCACAGCCTCGGCGCAACCCTATCCATCGTGAGCGCCTTCGACCTGGTCTGA  
AAACGGGGTAAACGGAGGTCCCGGTCACCGCCATCGTGTTCCGGTCCCCCAGGTCCGAAACAAG  
GCCTTCAACGAGAGGTTCAACATGTTTCCGA ACTTGAAAGTTTTGCACGTGAAGAACGTGATCGA  
TTTGATCCCACACTACCCGGGGAAGTTGTTAGGGTATGAGTACATGGGCACGGAGCTGGTGATAG  
ACACGAGGAAGTCGCCGAGCTTGAAGGACTCGAGGAACCCGGGTGATTGGCATAACTTGCAAGC  
GATGTTGCATGTGTTGGCGGGGTGGAATGGGAAGAAGGAGGAGTTTGAGATGAGGGTGAAGAG

GAGTGTGGCGTTGGTGAATAAGTCGTGTGAGTTTCTGAAGGAGGAATATGGCGTGCCAGGGTCGT  
GGTGGGTGGAGAAGAATAAGGGGATGGTGAAGAGGGAGGATGGGGAGTGGGTGTTGGATGCCG  
CAGATGAGGAGGATGTGCCTGTGCTCGAAGAGATTTGA

Protein

MSGWLTIIYSDNPKSPFTKSSARTQLQAHVKSLLQHYSENPSLVIVGHSLGATLSIVSAFDLVENGVT  
VPVTAIVFGSPQVGNKAFNERFNMFPNLKVLHVKNVIDLIPHYPGKLLGYEYMGTELVIDTRKSPSLKD  
SRNPGDWHNLQAMLHVVAGWNGKKEEFEMRVKRSVALVNKSCEFLKEEYGVPGSWWVEKNKGMV  
KREDGEWVLDAPDEEDVPVLEEI

### 3. GLYMA18G40360.1 (GmNAB)

Promoter (2 kb upstream)

ACAATGTAAAATAGGATCAAAGTATCATAAACGAAAACGAAAGTCGTAGAGGAAAGAAACATG  
CAAGAAAATAGAGGGAGTGAGAGATGAAACAGGAGAATAAAACATGAGATAAAACAACACTA  
TTATTGGAGAAAGGATAAAAATAGATTTTCAAATCAATATGTAAATAAAATAATAATAATA  
AACATATAAGAAAGGTGAGAAAAAGAAATAATGGATTCAACACATAAAAAAATAAGAGGTATA  
AATAGTAAATAAAGGGGTGCATTTATTTATCTTCAAATGAAAATAAGTGAAGCAGGGGTGCAA  
ACATATGTAATTAAGGATGCAAAAATATAAAATTTTGACACAAATATAAGTGACTTTATTA  
AGGAAGTGTGTTTGCCACCCTCAAATATATATGGGTCTGCTGCCCTGGGTCTAGGGTTCAGATA  
GGAGTGCCTAAGGTTTAGGTTGTCATGCATAGTCACATAATGAGTTTGTGCTCTATAACTCATT  
GACTTAGTGA AAAATCTCAAGTGCTACTTGACGACAACTAGACATAAGTTAAGTGACCTGAATT  
AAGATAAAATATTAGTTCAATCTTTTTATCCCTTAAACTTTTTAATTACTGTTTTTATTATTTGTGC  
ATAAATTATGTTAGAGTTTTGGGGATTTAACTCAATTCTCTTTATTATTAGAATTATTAAGTTATTG  
AAGTCACTTGATTAACACAAGTTGGTCTCGATTAGCCGGACTAGACAAATCATGAACATCGCTAC  
TTGTTACTTATAGTATTTTTTCTATCCTTGCATATTAACGCAGACTTATGTGTCAGCTAAGTTGTT  
GTTATTAATGTCAGCCTCTATTAATCGACACAAACAATTTAGTGAGACATGATCGTTGCTTAACT  
AACGGTAAATTCAATTTAAGCAACACCTTTGCATGAGTAACGACTTTTAGCAGTCGTCACTAGCT  
AATTGCGAATTTCTTGTAGTGTCTTGTACTGTAGTTGACCTGTATTTTTTTGAAAGACAAAATC  
TGACACTACATTTAACTACTTATATGGTTGGTTGAAAGTTAAATTCAATATGTCTAAAATTTCATA  
ACCAATGGTGCGGTTGGTCAAGTGGTTTGTAAGTTTGTCTTGATAATGAGCACAGGAATACTCTC  
AAGTGAGTGGTCCTTGATTGACTCCTGTGGAAAATAACAATTTGAAAAGGAGGAGTTGGTAG  
AAATTGATGCAGAACTATCTCTAAAAGGAGGAAACCCATAAAAATAAGTATATAAAAAGTATTTT  
TAAAATTCCATAGCTATCATCATATCATGCTATAGATTTTACATAAAACAATGATAGATTCATTTG  
TAGCAAGTTGCCATTTTAGTAACAAGAAAAATGGAAGATAAGAAGATCAGATAATAAATTAAC  
TATCTGATTAAGAGACTCTAACACCATACGAACAAACCATGTAATTTAAATACTTAAACCTCTA  
TATAATAAATAAGATGGAATGATCCTATCCAGCTAAAACAAGATTATCTCTGATAAAAAGATATTT  
TTGTCTATAAAGAAAATGGATAAATTTATCAAAAGCACTGGAAAAATAATAAACAAAATACTAA  
TTCTATTTCAGAACTTATGATAGAAATATATCCCCTTATTGCTAATGAAGAGTTTAGTACCACCAC  
AAGTGGACCAAAATGTTTATTTAATTTTCACTTTTCAAATATATCGTTACATTACCAAAAAAATA  
TCACAGATGACAGCTGCTACTGTGATAAACGGTTAGCTAATTCTTTGATCGAACACATAATTATT  
GTATTTGCGTACCTAACACAAGCTAATACAATGAGCATATACCTGAATTAACTTTTACCTCAGG

GAAAACATTTTTTTAGCTAGCTTTTCACCGAGACTAAAAGAGCACAACCTATAAAAATCATATAAAC  
TCTTATTGATCCTCTCAAGGCAGTGTAAAGCAAATGTCTAGTAGAAT

CDS

ATGTCTTATTGCAATTTCCCCTTCGCTTTGCAAACAAAGATGGAGTTCAATTCCCAAACCCCTAAA  
AAATCTGAGATAAGATGGAGCCCAGATAATCAAGGTGGTCCTGGACAAGGGAAGTCTTATTCTT  
GTTACTTTTGAAGAGAGGGTTCTCAAATGCACAGGCCCTGGGAGGCCACATGAATATCCATAG  
AAAAGATAGGGCGGCAAAGCTCAAGCAATCTTCTGAGGAAAACCTTGCTTTCATTGGATATCTCA  
ATCAAGGCCACAAGTGATCATCCTAATGACCCTTCTGATTTCTGAAGAGAAAAATTTGTTTCGGTTG  
GGTGTGGTGAAGAGAAGCATCCTAGAAACCATAAATATCCATTCAATTTTTTCTCGCAAAGA  
TGATCATCATGATCATGCACCACAAATCCCCATCTTCTTCTTTTGTGGGGCAGATGGTTGA  
GGAGAAGAAAGCTGAATTAGACCTTGAGCTTAGGTTAGGGCTTCATCCTCGGGAGTCAGCAACA  
TTGAACACTAGATCGTTCTTTTGA

Protein

MSYCNFPFALQTKMEFN SQNPKKSEIRWSPDNQGGPGQGKSYSCYFCKRGSNAQALGGHMNIHRKD  
RAAKLKQSSEENLLSLDISIKATSDHPNDPSDFEEKILFRLGAGEEKHPRNHKYPNFFPRKDDHHDHA  
PQIPHLPSFVLGQMVEEKKAELDLELRLGLHPRESATLNTRSFF

#### 4. GLYMA06G18150.1 (GmELO)

Promoter (2 kb upstream)

GCTATATGAGCCAAGTCAAAAAAGCTTATTTTTATTGAGTTATCTTTTTGAAACCCAACCTAAT  
CCTAATTGCGAGTTGGACCATCACCTAGATTCATTTTGCAAGCTCTAGTTATGGGTATTGCATAG  
GTGTGTGCATGAAAAATATGCTCCAACCTCAAAAAATATTTTTCATTTGCACACTACACATAAGTTA  
ATTAGGTAATGCTAAAAAACTTGAAAACATTAATGCATTACAACATCCAACCTAGAAAACAATT  
TTGATAAAATGTTTACAATTATTATTTAAAATGTCGTCATTTCAATTAACATAACCATCATTCCAA  
TTAGTGTTAATTAGCACATCATACTTTTTCTTAACGTAATCAATGTTTCAGTAAAAAAATGAACA  
AAATAATTTTTTTGAAAAACATAAAGAACCAAAGTTAGACCTTTAAAACCTAATAGACCAAAAT  
AGAAAAACATAAAAATATAAAGGAGTGAAAGTGACATTTGACCAATTGTAATAATAAATCTA  
AATAAAAAATACATCAAAATGTATTTTAGTGTTTTATGTTTACAATTATATTCAAATTAGTTTGTTG  
TTTTTAAAAGTTAATTTAGACCTTTTAAAGTGAGTTAAAATGATATTTTTAAAATAATAAATAATT  
TTTTATTTTTGGAACATCATTTTGAACCTTTTGTGATTGATTGAGACATGAAAATTGTCTCATAGA  
TTCACGTAGATGACAATTATAAAATATTAAAAAAATCATAAATCAATAAAAAAGGGTTCATGT  
TCCAAAATAAAAAATTAATTATTATTTTAGAAGGATGATTTGATTCACTCAAAAAATGATTA  
TTGAAGTTTTAAAATGATAGATGAATCGTTTCTAACGAGGACTCACTTAAAAATATAAATGAC  
TAAATTTAATTGTTTAAACATTGGTTTGGTTGCACATTAAGATAAGGAAGCACGGGTGGAAGA  
ACATAATGAATGGATATTGGGATATGTGTGTGGTTGGTAGGACAGAAGAGGGAAGACCTGTG  
GAGAAAAAATGCTACTGTTTCTTCACTAAACATAGTGAATAAGCGCAAAATTGGGGTGC  
ATATTGCAGACCCTTACTAGAGACTAGAGAGCCCGTAAAGGCACAGGTTTTGTGCCTTCTTTTT  
CAATGTTTTCTACTTTTTTTTACAATATAATAATATATTTTGATTCATTTTTTTTACTTTTAACTAA  
TTTTAATTTAAATATTTATCTATTATTTTTTATTGATCTTTAACCAAATAACCTCACTTTCATTTAT

TTCTTACCTACTTTTTTCTATTATTTTTTTTATTCTCAATCAAACACACTTTAAAAGATAAAAAATC  
AAATTAATATAATAAAAAATAAAGACTAAATATCATTTTAGCCAAAGTTAATAAATTTGTTTT  
CTTATTTAAGTCATAAACTTAAATATATTTTTGTTTTTATATTTAAATTAATGTTACACAACATTT  
ATAAATTTATGAATTAAGTTGATTATTTAAAAATGTGAAGATTGTTTACAAATACATAATTCAAC  
CACTAAATATTTTATATACCGGTATGATTGACAATTTATAAGATAAGATGACAAGAATATTTTAA  
AGTATTAATAATTTAATTTAACACATTAAGGCCCGTTCATTTGCATAGAAAAATGATAGAAAATA  
AAAGAAAGTAACTCCATATGAGACTCATATTTTAAATCAAACCTTTATCATATTTCACTTTTATTT  
TTTTATTTTCACTTTACTGGACCAACCTAAATGAGATGAAATACTAATAAAAAACCTAATTATTAT  
TTTTGGAAAAAATATTAGAAACACTGGGGCACACTTTCATTGAAGACAATTATTAATTAACGT  
ATAAAATAAGATAATTATTAATTTACAAGAGAAAATCTGAAGAAAATAAATTACGATAAATTA  
ACATTTTATTGAGAGTAGTAACACAAGTCAC

### CDS

ATGGCGGCGGTAGCGGTGGCAGAGGTTGGGAAGGCCCCACGGCCGGGCCAGGGCGGTTACGAA  
GCGCACGGCCTGAGCGAGGAGGAGGCTCGTGTACGCGCCATCGCGGAGATCGTGAGTTCCATGG  
TGGACCTCTCCCACAAAGGCCAGAACGTGGACCTGAACGCGCTCAAGTCCGCGGCGTGCCGCAA  
GTACCGGCTCTCACGCGCGCCGAAGCTCGTGGAGATGATCGCGGCGCTCCCCGACGCCGAGCGC  
GAGACGCTCCTCCCCAAGCTCCGCGCCAAGCCCGTCCGCACCCGCTCCGGAATCGCCGTCGTCG  
CCGTCATGTCGAAGCCGCACCGGTGCCACACATCGCCACCACCGGGAACATCTGCGTCTACTG  
CCCCGGGGGACCTGACTCCGACTTCGAGTACAGTACCCAGTCTTACACCGGTTATGAACCAACCA  
GCATGCGTGCAGTTCGTGCGAGGTATAATCCATATGTCCAAGCGAGGTGCAGGATAGATCAGCTT  
AAGCGTTTGGGTCATAGTGTAGACAAGGTTGAATTTATCTTAATGGGCGGTACCTTCATGTCACTT  
CCGGCTGATTACCGTGATTACTTTATAAGAAATCTTCATGATGCTTTGTCTGGACACACATCTGCC  
AATGTGGAAGAGGCAGTGGCTTACTCTGAGCATGGGGCAACCAAGTGTATTGGCATGACAATTG  
AAACGAGGCCAGATTATTGTCTTGGGCTCACTTGCGCCAAATGCTTTCTTATGGTTGTACACGAT  
TGGAGATTGGAGTCCAAAGCACCTATGAAGATGTTGCTCGAGACACAAATAGAGGACACACTGT  
TGCTGCTGTAGCTGATTGTTTTGCCTGGCTAAAGATGCTGGTTTTCAAGGTTGTTGCTCATATGATG  
CCTGATCTTCCAAATGTTGGTGTGAAAGGGACATGGAAAGTTTCCGGGAGTTTTTTGAGAGTCC  
CTTGTTTAGAGCAGATGGGCTTAAATATATCCTACACTTGTAATTCGTGGAACCTGGGCTTTATGA  
GCTCTGGAAACTGGCAGGTATAGAACTATCCACCAGAGCAACTTGTGGACATTATAGCAAGG  
ATCCTTGCAATGGTACCCCATGGACACGTGTTTATAGAGTTCAGCGGGATATCCCATGCCTCTG  
GTTACCTCTGGGGTTGAGAAAGGAAATCTGCGGGAGCTGGCATTAGCTCGAATGGAAGACCTGG  
GATTGAAATGTCGTGATGTTTCGGACCAGAGAAGCTGGAATCCAGGATATTCACCACCAAATTA  
GCCAGAAGAGGTGGAGCTTGTTCGGCGTGATTATATGGCAAATCAGGGTTGGGAAACATTTCTAT  
CATATGAAGATACACGGCAGGATATCCTTGTGGTTTTGTTGCGGCTGCGAAAATGTGGCCGCAAC  
ACAACCTGTCCAGAGCTTATGGGGAAGTGTCTATTGTTTCGTGAACTCCATGTTTATGGAACTGCT  
GTACCAGTTCATGGACGGGATGCTGACAAGCTACAACACCAGGGTTATGGCACACTTTTAAATGG  
AGGAGGCAGAGCGCATTGCTTGCAGAGAACACAGATCAACAAAAATAGCTGTAATTTAGGGGT  
TGGCACACGCCATTATTACAGGAACTGGGATATGAGCTTGAAGGACCTTACATGGTGAAATAT  
CTAGTGAATAA

### Protein

MAAVAVAEV GKAPRPGQGGYEAHGLSEEEARVRAIAEIVSSMVDLSHKGQNVDLNALKSAACRKYR  
LSRAPKLVEMIAALPDAERETLLPKLRKAPVRTASGIAVVAVMSKPHRCPHIATTGNICVYCPGGPDS  
FEYSTQSYTYEPTSMRAVRARYNPYVQARCRIDQLKRLGHSVDKVEFILMGGTFMSLPADYRDFIRN  
LHDALSGHTSANVEEAVAYSEHGATKCIGMTIETRPDYCLGPHLRQMLSYGCTRLEIGVQSTYEDVAR  
DTNRGHTVAAVADCFCLAKDAGFKVVAHMMPDLPNVGVERDMESFREFFESPLFRADGLKIYPTLVIR  
GTGLYELWKTGRYRNPPEQLVDIARILAMVPPWTRVYRVQRDIPMPLVTSVGEKGNLRELALARME  
DLGLKCRDVRTREAGIQDIHHQIKPEEVELVRRDYMANQGWETFLSYEDTRQDILVGLLRKRCGRNT  
TCPELMGKCSIVRELHVYGTAVPVHGRDADKLQHQQYGTLLMEEAERIACREHRSTKIAVISGVTRH  
YYRKLGYELEGPYMVKYLK

5. GLYMA05G37930.4 (GmSRL)

Promoter (2 kb upstream)

CCCAGTCACCATGATGCTCCTAATTTTCATAGACTTGAGAATGGAAATGACTTCTTGTGCAGCTGG  
TTTCAATGGATCAGATACTACTAAAACCCCACTACTTCCCTATTTATAGACACTATAATTCCAGT  
TTGAGCCATTCCTTCCGCTGCTGCAAGTATCTCTTCAGAATCAACAGGAAGTGCAACATTGTGGT  
CCGCCATCAAGGTCTTGTTAACCATAAGTCAATTGTAAGTTTTGTGTTTATCTCTATATTAATTTTT  
GAGTTTGCATATTTGGTTCTTCTAATTTTTTAAGTAAATCAAGTCTATTTATTTAAGATTAAACCA  
ATTTAATTTTTCTGTCAATTGTATTTTTATTGAAAACTTTTATATAGTTTATTTGGTAAGGAGAGAAA  
TAAATAATATAAAAAGAGAATAGAAAATAGGATCATTTTAAGTTGTTCAATAAAAAAGAAAA  
TGAAAGAAAAAAGTTAAACTTTTTCTTTCAATTTACTTAACCGTGAAAAAGTTAAATAATATAT  
ATATATATATATATATATATATATATATATATATGTATATATATATATATCCATCTGTATAAAAAATAAGAAT  
AATTTAATTACACAAAAGCAATTTTCTCTCACTTTCTATCCAGAATGGGATGAAATAAAACAACA  
ATGAGCTCATAAATATTTCCAATAAAAAATTATAAAAAATAAGAGTTATTTAATAATTAATTACCC  
AAAAC TCCAAA ACTCCAAAACAAC TTTTTCTGCTTCTGCCAGAAATGAAAAAAAATAAATGAA  
AAAAATAGCGAGTCTCAATTACTTTTTTATGGTTCCTTTCTTCTTCTGAACCATTAATCATGTAGTG  
AAAAGATTTTTCTTTCTTTTCTTTTCATTTCCATAGGCTGATTCGGTCTTCTCCCTTTCATTGTTCC  
AAACATTATGTAGAATTCTTGTTTCTTTCCAAATCTTTACTTCCCTCAGCTCCATAATAATTTTCGT  
ATAATTTTTTAAATAATTACTTTAACTTTTGAAAGTAACATTAAACATTTTTTATTAATATTTT  
TTTTATAATATTAATGATCAACAATAAAAAATTAATATTAATTGATAGGATAAAAATTAATTTTTTT  
ATACATGATAAGATTAATTTGTATAATTATCATTTTTAAATCTAAGATAATATTTATAATGAGATA  
GGAAGAGTTTTATTTATGATAGTTTAAAACGTAAAATAATTTTAAAAATTTAGAAGAGACTTCCT  
GTAGATTATAACAAATTTTATAAAGAGAAAATTTGTTATGTACTGCGAACGTAACCTCACTTAATC  
ATAATTTACAATATATGAAGTTGTTGACTTTTAACTTTTTTTTTTAAATAATTTAAATAATGATTTAT  
GATTGAATAATAATAAAAAATTATATAGTTATTAAC TTTTTATAAGATATATAGTTGTGTTCCGT  
AAAATTAATTTGAAACTAAAAGGTCAACTAGTAACTGGAAA ACTAATTTATTAATTACAAGAA  
TTTAGTAAAATTAATTTTGAAGTAACTAAAAATATAAATGACATAAATAATAAAATTATGATT  
TGTTTAAAAAAGGATAATCAAGAAATTAATAAATATATTGAAAATAATAAAAAAATATAAAA  
AATTAGAAATTAATGTTAAAAACACACTAATTCAAGTAATTTTTTAAAAATACACTATAAATATTT  
AAAAATTATTTATTAATCAGTCAAATAAATTTTTCAATTAATAAAAAAATTAAAAACTAATTT  
AAATATCTTGTA AAAAATAGCCATAAGATTATTTCAAAAAGAGAAAACATTTAAGATTCTATGT  
AGTAAAATTTAATGTATATTTTTAGTGAGAGAAATATTTAAAACAATTTCAATGAATCAATTTTAA

AAACAATGTTTAAAAAATAAAGAGCTATAATATAAGATTTTAAATTGAAGAGAAAACGAAATTT  
CCTAACAAGATTTAATTATTAATTAACTA

CDS

ATGGAAGAAGAGAGCCAAATAACAAAGGGAAAATATGCTGCTGATATTTCTTCATAAAAAGAA  
GCACATGCCAGAATAAAATCATTGGTTCATAAACTCCGCTTCTGTCCTCCAGCTCTCTGAATGCT  
ATGTCAGGAAGGAAGCTCTACTTTAAATGTGAATGTTTACAAAAGGGTGGAGCTTTTAAATTTAG  
GGGAGCCTGCAATGCTGTGTTTTCTCTCAATGATGAAGATGCTTCTAAAGGGGTTGTAACACACA  
GCAGTGGAAACCATGCCGCAGCATTGGCTTTGGCTGCAAACTACGGGGGATCCCTTCGTATATT  
GTTATTCCAAAAAATGCCCAACTTGCAAAATTGAAAATGTAAAGCGGTATGGTGGTCAGGTTGT  
CTGGTCTGAAGCCTCTGTTCAATCAAGGGAAGAAATTGCCAACAAAGTGTGGCAAGAAAGTGGT  
GCTATCTTTATACATCCATATAATGATGGACGCATATTAAGTGGCCAGGGTACCATATCCTTGA  
GATTCTGGAACAAGCACCACAAATAGATACGCTAGTAGTACCATAAAGTGGTGGTGGTTTTGATAT  
CAGGAATAGCATTGGCTGCCAAGTCCATTAACCCAGCTATTTCGTATTTTTGCTGCTGAACCTAAA  
GGTGTGATGATGCAGCACAATCTAAAGCAGCTGGGAGGATAATACGATTGCCTGAGACCAACA  
CTATAGCTGACGGGCTTCGAGCATTCTTGGAGATTTACATGGCCTGTTGTACGAGATCTTGTTG  
AGGAAATTATAACTGTTGAAGACAGTGAAATAATAAAAGCCATGAAACTGTGTTTTGAAATCTT  
AAGTTGTTGTAGAACCAAGTGGAGCAATTGGCCTTGCTGCTGTTCTATCCGATACTTTCCAGAA  
AAATCCTGCATGGAAGGATTGCAACCATATAGGAATAGTAGTTTCAGGAGGCAATGTTGATCTG  
GCCATGCTTTGGGATTCTTTGAACAAAGGAAAGTGA

Protein

MEEESQITKGKYAADISSIKEAHARIKSLVHKTPLLSSSSLNAMSGRKLYFKCECLQKGGAFKFRGACNA  
VFSLNDEDASKGVVTHSSGNHAAALALAAKLRGIPSYIVIPKNAPTCKIENVKRYGGQVWVWSEASVQSR  
EEIANKVWQESGAIFIHPYNDGRILSQQGTISLEILEQAPQIDTLVVPISGGGLISGIALAAKSINPAIRIFAA  
EPKGADDAAQSKAAGRIIRLPETNTIADGLRAFLGDFWVVRDLVEEITVEDSEIIKAMKLCFEILKVV  
VEPSGAIGLA AVLSDTFQKNPAWKDCNHIGIVVSGGNVDLAMLWDSL NKGK

## 6. GLYMA08G01670.2 (GmSR2)

Promoter (2 kb upstream)

AAAACAATGAGCACATAAATATTTATAATAAAAAAAGATAAGTAAGAGTTATTTAATAATTAAT  
TACACAAAACCTCAAAGCAACATTTTCTCTGTTTCGTCCAGAATGGACAAAATAGTAAAATTTAA  
TGTATTTTTTAATGAATTTTAAGAGGAGAAATAATTAATAATTTAATTGATTCAATTTGCAAAA  
AATTTATTTTAAAAATAAAGAGCTATAAAATTTTAAATAGAAAAAAAATTACTAACAATATTTA  
ATTAATTAAGGATATATTTGAGTAAGTAATCATTTTTGTCTTTAAAAATATATAATATTAACAGA  
TTTATTCAAAAAAGATGAAAAAATAAAATTTAATCATGAAAGGATAAAAAATGAGACAAATAT  
GTCTCACCTTAATGTTAGAAAACCTTGCCTATATGATAAGTAAGATAAAAAATGTCATGAATTTAAT  
GCTCATATGAACATAAGAATTAATAAAGTCACTTAGAGATGCATTTCTAATTTAACAACCTTATT  
AACATTTTAGTACTTCAATTATACAATTTACTCACAAATATATCTATGAAATATATAAATCTAACT  
AGCTAGCATCATTAACCTATGATACATGTATCAATAACACATTATATTTAGAAGTTTATGATTTTGT  
TATTACAAATATTTATTACAATTATAGTTATACTTATAATGTGAACTTATCATAAATAAATCAAGA

CTCAAGAGGAGAAGGTAAGATAAGAGTAAATTTTTAAATAAAAAATTAGTTTATAAAATCTTAA  
GAGTGC GTTTATAAAAATTTGAATTTATTATAATTTAGAATTCATTGTTTGAATACTTTTTATGAAGA  
ATTTAAAATTTTGAATTTTAAAACAAAATTTTAAATAACTAAAAATCTGGAATTTCAATTTTCTT  
TTAGAAGGTGAGAAATTTGAATTTTCAAGAGGAGTATAACTAGCACACCAATCATATATTTTCT  
TTTTTTCATCCTCATAATTTTAATTTTTTTTTATCCAAACACAAAATTTGAAAATAAAAGAATTTCA  
TTTAAAGTATTTGAAATTTCTTAATTTAAAATTTTCAAATTTTAAATTTTGTAAATGAATTGTGT  
AAGTATAAAAGATGTATAGAAACAGAACTAAAATATATTTATAGCTTCCGGTAATTACCACCTA  
TATTATAATAGAAATTGACAAATTATACTTTCAAATCAATCTAATATTTTCATCTTTGATGAATTTG  
TTAGCGCACAAGTTTATAGGGAGAAAAATGACTGTTTTTACCTTGGATTAAGTTGAAGAAGTGG  
GGTGAGGGTTCAATTTCCCGACCAGAAGTCTCAGGTTGCCAGCCTGCATTTTCAATTTCACTAG  
TAAGTTTCGGATTCTTCAAATCAATACCACATATATAACACTTGTATTTGACTTCGGATTCTCT  
TTTCGTTTACCTGCGGACAACCTTCTGTCAGTTTTTTTTTTTTATCAGCAAATGTTAGATATTAGA  
TTTTTGTAAACCGATGATTGGAACCCTCGACCTCACTCCCTTCGCCACCAAGTCAACCTTATAAGA  
CTTTACTAACCGTGAATACTCCCCTTGTCAAACATTCAACGTTGTACCAATGTTTTTCATTCATGTT  
TCTAGGAATTTACCCACACTTTATTTACCCCCACACTTTTTATGCAATTTTAAA  
TTTGAGATCATAAGAGAATTAATTGGTACTGTGGGTAGGTAATCTCTATTTTATTTTCGTACAAAT  
TCAGATTATGGAACACTTACCTTTATGCCTTTGGCTTTGTTGTTGTTGTATATTGCTTGGTAATC  
ATGGGACACAATACTAAAATGTTTGATAGCGTTTTTTTGTTAATAGTTAGCTCAATTTTCATAG  
TGAAAGGAGAAAATTGGTGGATTGGCATTAAACATTGTTTCTGTTGGAAAGACAAATACGCACT  
GATCTGTCTTCATTCACTTCTGAGACCAATTACTTAG

CDS

ATGGAAGAAGAGAGCCAAATAACAAAAGGAAAATATGCTGCTGATATTTCTTCCATAAAAAGAA  
GCACATGCCAGAATCAAATCATTGCTCTCTGACTGCTGTCAGGAAGGCAGCTCTACTTCAAATGT  
GAATGTTTACAAAAGGAAGAAAAGATGATGACACACTTCCTTGTGCATCCTATGGCCATCAGT  
GGAGCTTTTAAATTTAGGGGAGCCTGCAATGCTGTGTTCTCTCTCAATGATGAAGATGCTTCTAAA  
GGGGTTGTAACACACAGCAGTGGAAACCATGCTGCAGCATTGGCTTTGGCTGCAAAACTACAGG  
GGATCCCTTCGTATATTGTTATCCCAAAAATGTGCCAACTTGCAAAATTGAAAATGTAAAGTGG  
TATGGTGGTCAGTTTGTCTGGTCTGAAGCCTCTGTTCAATCAAGGGAAGAAGTTGCCAACAAAGT  
GTGGCCAGAAACCGGTGCTATCTTTATACATCCATATAATGATGGACGCAAATTAAGTGGCCAGG  
GTACCATATCCTTAGAGATTCTGGAACAAGCACCAAAATAGATATGCTAGTGGTACTCATAAGT  
GGTGGTGGTTTGATATCAGGAATAGCATTGGCTGCCAAGTCCATTAACCCAGCTATTCGTATTTT  
GCCGCTGAACCTAAAGGTGCTGATGATGCAGCACAATCTAAAGCAGCTGGGAGGATAATACGAT  
TGCTGAGACCAATACTATAGCTGATGGGCTTCGAGTATTTCTTGGAGATTTGACATGGCCTGTTG  
TACAAGATCTTGTTGAGGACATTATAACTGTTGAAGACGGTGAATAATAAAAAGCCATGAAACT  
GTTTTTTGAAATTTCTTAAGGTTGTTGTAGAACCAAGTGGAGCAATTGGCCTTGCTGCTTTTCTATCC  
GATACTTTCCAGAAAATCCTGCTTGAAGGATTGTAACCATATAGGAATTGTAATTTTCAGGAGG  
CAATGTTGATCTGGCCTTGCTTTGGGATTCTTTGAACAAAGGAAAGTGA

Protein

MEEESQITK GKYAADISSIKEAHARIKSLLSGCCQEGSSTSNVNVYKREEKMMTHFLVHPMAISGAFKFR  
GACNAVFSLNDEDASKGVVTHSSGNHAAALALAAKLQGPSYIVIPKNVPTCKIENVKWYGGQFVWS



EASVQSREEVANKVWPETGAIFIHPYNDGRKLSGQGTISLEILEQAPQIDMLVVLISGGGLISGIALAAKSI  
NPAIRIFAAEPKGADDAQAQSKAAGRIIRLPETNTIADGLRVFLGDLTWPVVQDLVEDIITVEDGEIIKAM  
KLFFEILKVVVEPSGAIGLA AFLSDTFQKNPAWKDCNHIGIVISGGNVDLALLWDSL NKGK

7. GLYMA20G32540.2 (GmUC1)

Promoter (2 kb upstream)

TTATTTATGTTTTGTCTAAAAATTTATAACAAATAATGTATTCATTGCAATTAGTAATTAGTGAAG  
AAAGCAGCAAGGTTATATTGGTGTGTGTAATGTGTTAATAGTATCGCTTCACTTGTTATGTTGCC  
GATAGATAGCCAAAGTTTCTTGCTCAGATGTTCCAATACAATAATAAAAAAAAAATTTAAATAGTAG  
AAAAATATTATAGAAAATAAATATAACAAAAACACACATATAATAATAATAATTTATTATTAT  
ATAAATAATAATTCATATATATATATATATATATATATATATATATATATATATATATATATATAT  
ATAAGATATATTTTTATTCACAAATAGCAAGTCTTGTTAAATTAATTTCAATCATAAATTTATATT  
AAAATGTTTATTTTTACCTCAAACATACCTCATTCCATCTCAAATTTATGACATAAATGTGAGAG  
GTATTGCTCTAAAACAGTTGTCATAGAAACAGTTTAGGAGGCAATGAATTTCTTAAACTTACACT  
ACTCGCAAGAAGTGATTATTTCTGTGATTTTTTAAAAAGGTTTATTATAATTATTTTATTTTATACT  
ATAAATCTAAGATGTTATTTAAAATGTAATGTTTTTTTTTTACTTTTTTCTAATGAGTTATATATTT  
ATTTATCATTTTTTAAAAATTTAAGCTATCAACCAGGTTCAATTTAAAAAATTGAACCTTTTCAAT  
TAATTATTTATAAATTTTCATATTAATTTTTTCTCTAATTAATTTAACCTTTAAATGATTTTTTAAAGTTG  
TATAATCTTTTTTCTCTTTAAATTTAAACCCTTTATGTTTTCTTACTTGCTTGTCTGAATTAATTCTGA  
ATATTTATCTTTTAGTTTTAAATATTTTTATAAATTAATTAATTAATTAATCACATGTATCATCCACA  
AAATACTTATTAATTTTTATATTATTTAGTCGTTATTTCTTTTGGATAAATTTTTTAAACACGAG  
TCTTTCACTCACACTAGTTGTGACTGGGTCTAATTATTAGATTTTTGTTGTGGTTAAGAAATATGT  
AAATTTCTCAATAAATTCATATTAAGATTGGTGGTCTTTCTTAGTCTTACAAAGTAATTTTTCTTTT  
CCTAATCTAAACTTTTTTAAAGTGAAAAAAAAGGTGGTGTCAAATCATATGATTGGGCGATTATTC  
AATTTTTAACCTAAATTTATGCAAATATTTAGATTTAATGACACTTTTAGTCTCTTTATTATCATCA  
AAATTTGAATTTTATATTTTCTTTTTGCAAATTTGATTTTCATTATTTGTATAATTATGCTTTTTATCTA  
TTAAGACTTAAATAATTTTTTAGTCTCTATAAAGTATGATTTTTTTAATTAAGACCTTTAAAGATT  
TTTTCTTTAGTTCTTTAAAGATTTAAAGTTTTTTATTTAATTCTTGTTGTAAAGTAATACCGTTAA  
TTAATAATGTAATAATGATGTTGATAATTCATTAATTTTTCATATTATCAATGAGTTTGATAGGAT  
AACTATAAGTAATTTTTTGA AAAATCTATTTTTAAATTTCCATTAAGTAGTTTAACTCATTAATT  
TTTTAAATAAACTAAACCCGAAACTCGTACATTGTACGTA AAAAAGATAAGTAAAAAAGAATT  
AATATTTTAAAATGCAAACAAAAAAAAGTGTAATGCAACAGAGTATGACGCATGGAATTTTGA  
TTTGGTGGCTGAACTGATTTTTTATTTATTGGTAGAGTTTAAAAACGTAATTTATTTAAAAAAA  
ATATTATCTCTTATTCCCATGATATATTTTATGCAAATATAAAACTATGTTGTAATTGCATGACCAT  
AATTTGTTTTCTTAAGTCTTAATCAAACCTCCTCATTCTTGAGTCCATTTTGATTTCTCTGCATCTA  
AACTCTCTTAATTGCACACACAAGACTCAAGTTACTCCGCA **CGTC**GCACCATTCCACAACCGATG  
CTCTA

**CDS**

ATGTCTGACCCTTCTACCCTCTTACCCTCCTCCCACCACCACCACAACCACCATGTGCCACTCATC  
CAAGGCGGCCGCCACCGCACCCTCCTCCTCCTCCACCACCCTAGCCCGAGAATACCGCAAGGGCA  
ACTGGACCATCCAAGAGACCCTCATTCTCATCACTGCAAAAAAGCTCGACGACGAGCGCAGGCT  
CAAAACCCCTGCTGCATGTAGCACCTCCACCACCACCACCAGAACCAGCGGCGAGCTCCGGTGG  
AAATGGGTGGAGAACTATTGCTGGAGCCATGGCTGCTTGCGAAGCCAGAACCAATGCAACGACA  
AATGGGACAACCTCCTCCGCGATTACAAAAAGGTTGCGGACTACGAGTCCAAATCAAACGACAA  
CGACAACAACAACAACAACACTTCCCTTCTTATTGGACCCTCAACAAACAACAACGTAAGGAA  
CAGAACCTCCCTCCAACATGGTCTTGAAGTCTACCAAACCATCGCCGATGTCTCCAACGAAA  
ACAAACACAATCCCAAAGACAACATCAACAACCTCTGGCTATTCCATTAGTTACTTCTCACCT

CACCACTTCAAACACTTCCACCACCTCCTCTACCACCACCGCCGCTCCGCCACCTCCTCCTCCGC  
CAGTTAGCTCCACCCTCCGGTAGGCTCAGAGAGATCGGAATCATCAGGAACTGAGCACAGTGA  
GGATGATGATGATGGGTCCGAATCAAACGCTAGGAAAGTTAAGAACCTTGGTTCAAGAATAATG  
CAAAGTGCATCGGTGTTGGCACGAGCTCTTAGGAGTTGTGAGGAGAAGAAGGAGAAACGGCAC  
CGTGAAATGATTGAGCTGGAGCAAAGGAGGATTCAGATGGAGGAAGCTCCGAATGAGGTTAC  
CGCAAGGCATCGCGACCCTTGTCCGCCCGCTACCAACCTTTCCGGTGCCATTGAGTCACTCAT  
TAATAATTCTGAACGCCATGGCCAAAGATAA

Protein

MSDPSTLLPSSHNNHHVPLIQGGATAPSSSSTTLAREYRKGNNWTIQETLILITAKKLDDERRLKPAA  
CSTSTTTTTRTSGELRWKWVENYCWSHGCLRSQNCNDKWDNLLRDYKKVRDYESKSNNDNNNNK  
HFPSYWTLNKQQRKEQNLPSNMVFEVYQTIADVLRKQTSQRQHQQPLAIPVLTSSPSPLQTLPPPPPL  
PPPPPPPPPPVVSSTTPVGSERSESSGTEHSEDDDDGSESKRRKVKNLGSRIMQSASVLRALARLSCEEKKE  
KRHREMIELEQRRIQMEEARNEVHRQGIATLVAAVTNLSGAIESLINNSERHGQR

#### 8. GLYMA17G07200.2 (GmUC2)

Promoter (2 kb upstream)

AACAATCTTATAAATTTTTTGTAGACACTTTTAATTATTCAAGCCTATTATTTCTTTATATATAATT  
TTTTTTTTTATGTTAATGGGTCTAATTCTGAACGAATGCGTTACTGTAAATCATCTAACACTTTTTTT  
AATTCACACGGATTAATAAATAACATTTTTTTCTATCTTATTTTCATCGTATCATACTTTCCTCTT  
TGTTATACAAATTTTTGTATAAAGAAATTATACAAACATAATGTCTCATTTTATAATCCATCTCC  
CATGTGCTTGGTCCAGTCAACAATTTGTAATACTACTGAACCAGGTTGGGAGGGAAGGAGAGAG  
AAAGAAAGATAGAATAGAAGAGTAAGTTTGGTCCTAATTAATAATGGCATCGTCCAAAGACAG  
AGTACAGAGCTAGATAGAAGTCTGTTTCTCCATTCTGGCACTGACTATAGTTGATGAAATTGA  
AGGCAAAGTCATCAATACAGATTCAATAGAGTCAGGTCTGTAAGTGTAGTAGTAGTAGTTGTT  
TGTAACCTAACATCACAGACGATTAGAGATATGGATTCAAAGGGACCAGTACGAAATTCACTAC  
ATATCTACATTTAGGAATTATGTACAAGCTACCCTGCCGTTTTATATTTATTTGATTCTTTTCAAAG  
CGATCGAGGAAGTACGGTAAAAGGTAAATCCGAAAACAAAAAATTATTAAGTTAAAGGTTG  
TTAAAAGAATTTATTTTTCTTTCGTTTTTTAAATTTTCAATTTTTTTAGTAAGAGCATTGAAATTT  
TAAATATCACATCAATACTTTTTTTTTTTTTATCTTTTTCTTCTATCACATCACATTATTTATCATAT  
ATGTTTTTTTTTCTTATTAGGAGTAGAATAATTTAAGGTGCCTAATTATATTTATTCTTAATTT  
TTAAGAGTAGTAATATTTGAATACCTGATAATTTAAACATCTCACCAATTTTGCTTCTTTTTTTAT  
TTTTCTTTTCCTATTTGTATATTATCTATCACATTTATATTTTTCGTTTTTTTTTTTTCTTCTCATA  
TATACTAAGTGCTGAATAGCATTGTGGGTGTTGAATAACATGTGGATGTCTATAGTCTATCTATAT  
TTCCATTTTTAATCAGCAAGTATAAATACGTAATTCACAGGATAAAAAATAAATAAATACGTAC  
TTCATCCTTTAAAAATACACCTGACACACCTTAAAAGATTATTTTTCGGTGGAGGGGTAGATTTGC  
TAATTGTCAAGTAATTGCGTCTTTGTATTGGGTTCGAATCGTAACAATGCACGTTATGTAAATTC  
AATTAATTTCAAGGGAATAATGAATTATTGGTAGGTCTGCTATATATTATTGACTGAATACACC  
CAAATTGAGTAGCCTTTGTTCTTATCATATGTACATACATGGGCAGACAGATATACATTGCTTCTA  
TATAACTTGATTATTCTACATATAGACTTCGTATCGTAATTCATACGAGGTGTTTCATGAGCAGAAT  
GCTTCAATATTAGTTAATTAATCTAAGCCGCCGATTTGTTAAAACGGGTTTATTGTCCAATCCTC  
TATGGACAGATAGTGCCAGAGTAAAACATAGGTATAGTACGTCCTTGATTTAAGACAAAAATGT  
AAAAATAGTACTCCAATCATGTTTATTGTTTAGTCGAGTCAAGGTGGTTTATCTTGCCATTTTTGT

AATTCCAAAATTGGAACATTGATGGAACACTTCATGATTCGAGTTTAAACTCGTTGTTGACAAGG  
GGTCACAACAATGCTAGTTAAATTTTTGTGATTATATGCTTCTTAAATTGAACGTCCACTCATTTC  
AAGACAGAAAACAAAGTTAAAATACAAATAAACCTGATTAATCTTCTTGGTGGGTTTCATACGG  
GGTACCCATAACATTATTTTTTGGCCATCGACCGACAAAGGATCCAAACTCTGCCATTAATGAA  
GGCGACAACCTCTTTGATTC

### CDS

ATGAATTTCCATAACCCCAATACTTCTCTTCACCTAAGCCAACACGATGATGAGAACCATCTCAA  
CCTAGATCTTCTTCTTGAGCCATCTTCTTCTTTCATCTTCACCTCACCTATTTGTTCCATGGAGC  
CACGGATATTCTCATGCAACTATTGCCAGAGAAAGTTCTATAGCTCTCAAGCACTAGGGGGTCAC  
CAAATGCCCAAGCTTGAAAGGACACTGGCCAAGAAGAGCAGGGAAGTGAACATG  
CAATCTTATGGAGCAGCGGAGCAAAGATCAAACCTTGGTGCTTCACACCATCTTGGTCATCGTGC  
TCTTGGGGTTGTGGATAACCAAGGACAAAGTTATGTGAGGCTTGGTGGAAAGGAAAGAGTTCAGT  
TATGGTTCCAAGGAAGGGGTAGGGGTGGCTTCTGGTCAAGGGCTTCTGAACATGTTCAGGAGG  
ATATGGGCCAACTTGACTTGTTCGTTAAGGCTTTGA

### Protein

MNFHNPNTSLHLSQHDDENHLNLDLLEPSSSSSSPSPICSMERIFSCNYCQRKFYSSQALGGHQNA  
HKLERTLAKKSRELSLNMQSYGAAEQRSNFGASHHLGHRALGVVDNQGQSYVRLGGRKEFSYGSKEG  
VGVASWSRASEHVQEDMGQLDLSRL

**Table S1.** Physico-chemical properties of all *GmCAMTA* proteins. (aa- amino acids, MW- molecular weight, pI- isoelectric point, Asp- Aspartate, Glu- Glutamate, Arg- Arginine, Lys- Lysine, II- instability index, AI- aliphatic index, GRAVY- grand average of hydropathy).

| Proteins                              | No. of aa | MW (kDa)  | pI   | Asp+ Glu | Arg +Lys | No. of atoms | II    | AI    | GRAVY  |
|---------------------------------------|-----------|-----------|------|----------|----------|--------------|-------|-------|--------|
| <i>Glyma.05g178200</i><br>(GmCAMTA1)  | 1122      | 126989.43 | 5.79 | 159      | 130      | 17668        | 47.68 | 75.97 | -0.625 |
| <i>Glyma.08g135200</i><br>(GmCAMTA2)  | 1102      | 124429.56 | 5.66 | 156      | 124      | 17322        | 43.50 | 77.79 | -0.596 |
| <i>Glyma.15g053600</i><br>(GmCAMTA3)  | 1088      | 122478.36 | 5.69 | 151      | 118      | 16999        | 49.97 | 76.17 | -0.552 |
| <i>Glyma.08g072100</i><br>(GmCAMTA4)  | 1079      | 121261.43 | 5.72 | 148      | 122      | 16874        | 45.99 | 77.27 | -0.522 |
| <i>Glyma.05g117000</i><br>(GmCAMTA5)  | 1088      | 121941.02 | 5.58 | 150      | 123      | 16966        | 45.00 | 75.90 | -0.514 |
| <i>Glyma.08g178900</i><br>(GmCAMTA6)  | 1081      | 121609.22 | 5.58 | 150      | 117      | 16890        | 50.60 | 77.12 | -0.541 |
| <i>Glyma.17g038800</i><br>(GmCAMTA7)  | 999       | 112283.90 | 6.81 | 131      | 126      | 15695        | 40.79 | 80.39 | -0.490 |
| <i>Glyma.15g143400</i><br>(GmCAMTA8)  | 911       | 103084.74 | 7.64 | 105      | 106      | 14419        | 42.07 | 80.72 | -0.428 |
| <i>Glyma.09g038300</i><br>(GmCAMTA9)  | 911       | 102969.37 | 6.55 | 109      | 103      | 14385        | 43.48 | 80.42 | -0.420 |
| <i>Glyma.05g148300</i><br>(GmCAMTA10) | 983       | 109314.7  | 5.43 | 132      | 103      | 15159        | 49.09 | 73.92 | -0.547 |
| <i>Glyma.18g005100</i><br>(GmCAMTA11) | 962       | 108036.77 | 5.39 | 137      | 109      | 14981        | 46.47 | 76.13 | -0.520 |
| <i>Glyma.17g031900</i><br>(GmCAMTA12) | 922       | 103869.70 | 7.39 | 104      | 104      | 14503        | 41.29 | 81.3  | -0.394 |
| <i>Glyma.07g242000</i><br>(GmCAMTA13) | 921       | 104293.99 | 7.03 | 107      | 105      | 14545        | 41.60 | 79.60 | -0.455 |
| <i>Glyma.11g251900</i><br>(GmCAMTA14) | 910       | 102394.56 | 5.54 | 130      | 106      | 14222        | 45.31 | 78.58 | -0.531 |
| <i>Glyma.08g105200</i><br>(GmCAMTA15) | 965       | 107767.11 | 5.81 | 124      | 104      | 14945        | 50.69 | 73.30 | -0.552 |





**Table S3.** Nuclear localization signal in *GmCAMTA* family. The position, sequence (NLS) and cut off score are shown. *GmCAMTA10* has the highest score of 9.5 while *GmCAMTA3* has the lowest value of 5. Predicted with the online cNLS mapper tool at [http://nls-mapper.iab.keio.ac.jp/cgi-bin/NLS\\_Mapper\\_form.cgi](http://nls-mapper.iab.keio.ac.jp/cgi-bin/NLS_Mapper_form.cgi)

| <b>Proteins</b> | <b>Pos.</b> | <b>NLS</b>                        | <b>Score</b> |
|-----------------|-------------|-----------------------------------|--------------|
| GmCAMTA1        | 110         | ENFRRRTYWLEEEELSHIVLVHYRHVKGTKA   | 6.4          |
| GmCAMTA2        | 38          | NYKKFRIAPEPAHMPPSGSLFLFDRKVLRH    | 6.3          |
| GmCAMTA3        | 924         | RGWKKRKEF                         | 5            |
| GmCAMTA4        | 110         | ENFQRRSYWMLELDMMHIVFVHYLDVKVNKT   | 5.9          |
| GmCAMTA5        | 110         | ENFQRRSYWMLEPDMMHIVFVHYLDVKVNKT   | 5.9          |
| GmCAMTA6        | 920         | FRGWKKRQEFMIRQRVAHVVRGHQVRKQYKPI  | 6.1          |
| GmCAMTA7        | 35          | ILRNHKKFKLT                       | 7.5          |
| GmCAMTA8        | 794         | RGFQARKQYRKIIWSVGVLEKVILRWRLKRKGF | 5.2          |
| GmCAMTA9        | 795         | RGFQARKQYRKIVWSVGVLEKVILRWLLKRKGF | 5.1          |
| GmCAMTA10       | 786         | SFRKRRAREV                        | 9.5          |
| GmCAMTA11       | 828         | RGYQVRKQYKLILWAVGILDKVVLRWRRKRIGI | 5.1          |
| GmCAMTA12       | 803         | RCFQVRKHYSKILWSVGVVEKAVLRWRLKRRGF | 6.1          |
| GmCAMTA13       | 804         | RCFQVRKHYSKILWSVGVVEKAVLRWRLKRRGF | 6            |
| GmCAMTA14       | 777         | RGYQVRKQYKLILWAVGILDKVVLRWRRKRIGI | 5.1          |
| GmCAMTA15       | 773         | SFRKRRARE                         | 7            |

**Table S4.** GmCAMTA Protein Interaction Network predicted with STRING database.

| <b>Protein</b>  | <b>Description</b>                                                                  |
|-----------------|-------------------------------------------------------------------------------------|
| GLYMA14G39640.1 | GIBBERELLIN-REGULATED PROTEIN                                                       |
| GLYMA17G07370.1 | CBL-INTERACTING SERINE/THREONINE-PROTEIN KINAS                                      |
| GLYMA19G40910.1 | ---                                                                                 |
| GLYMA06G15080.1 | Uncharacterized                                                                     |
| EDS1            | Enhanced disease susceptibility 1                                                   |
| GLYMA03G38310.1 | NEFA-INTERACTING NUCLEAR PROTEIN NIP30                                              |
| GLYMA02G41280   | GIBBERELLIN-REGULATED PROTEIN 12-RELATED                                            |
| GLYMA04G10750.1 | SERINE--TRNA LIGASE, MITOCHONDRIAL                                                  |
| GLYMA01G40090.1 | BTB AND MATH DOMAIN-CONTAINING PROTEIN 42                                           |
| GLYMA06G10621.1 | Serine--tRNA ligase / Seryl-tRNA synthetase                                         |
| GLYMA04G38630.1 | alpha 1,3-glucosidase (GANAB)                                                       |
| GLYMA19G41740.1 | Calmodulin binding protein-like                                                     |
| GLYMA19G41730.1 | Calmodulin binding protein-like                                                     |
| GLYMA06G16371.1 | Glucan 1,3-alpha-glucosidase / Exo-1,3-alpha-glucanase                              |
| ICE2            |                                                                                     |
| GLYMA09G34300.1 | EXTRA-LARGE GUANINE NUCLEOTIDE-BINDING PROTEIN 3                                    |
| GLYMA01G01470.1 | EXTRA-LARGE GUANINE NUCLEOTIDE-BINDING PROTEIN 3                                    |
| GLYMA18G23030.1 | SERINE/THREONINE-PROTEIN KINASE RIO1                                                |
| GLYMA09G30230.2 | EXTRA-LARGE GUANINE NUCLEOTIDE-BINDING PROTEIN 3                                    |
| GLYMA12G15430.2 | PHOSPHOLIPASE A1-IIDELTA                                                            |
| GLYMA18G40360.1 | Uncharacterized                                                                     |
| GLYMA17G07200.2 | Uncharacterized                                                                     |
| GLYMA20G32540.2 | Myb/SANT-like DNA-binding domain (Myb_DNA-bind_4)                                   |
| GLYMA04G36790.1 | elongator complex protein 3 [EC:2.3.1.48] (ELP3, KAT9)                              |
| GLYMA08G01670.2 | L-serine ammonia-lyase / Serine deaminase                                           |
| GLYMA05G37930.4 | serine racemase (SRR)                                                               |
| GLYMA06G18150.1 | elongator complex protein 3 [EC:2.3.1.48] (ELP3, KAT9)                              |
| GLYMA06G01080.2 | 2-OXOGLUTARATE (2OG) AND FE(II)-DEPENDENT OXYGENASE-LIKE PROTEIN-RELATED            |
| GLYMA16G31930.2 | RING-H2 FINGER PROTEIN ATL60                                                        |
| GLYMA16G14080.2 | G-TYPE LECTIN S-RECEPTOR-LIKE SERINE/THREONINE-PROTEIN KINASE SD1-13                |
| GLYMA20G39240.2 | U3-containing 90S pre-ribosomal complex subunit                                     |
| GLYMA03G04960.1 | Protease inhibitor/seed storage/LTP family (Tryp_alpha_amyl)                        |
| GLYMA11G11100.1 | NPH3 family (NPH3)                                                                  |
| GLYMA15G41680.1 | CELL CYCLE CONTROL PROTEIN 50 // SUBFAMILY NOT NAMED                                |
| GLYMA03G28660.1 | TAG lipase / steryl ester hydrolase / phospholipase A2 / LPA acyltransferase (TGL4) |
| GLYMA12G35680.3 | PHD FINGER TRANSCRIPTION FACTOR                                                     |
| GLYMA20G28680.1 | POLYPHOSPHATE 5'-PHOSPHATASE-RELATED                                                |
| GLYMA07G01300.2 | CALCINEURIN B-LIKE PROTEIN 10                                                       |
| GLYMA06G42750.1 | Fruit bromelain                                                                     |
| GLYMA08G19410.2 | Premnaspirodiene oxygenase / Hyoscyamus muticus premnaspirodiene oxygenase          |
| GLYMA04G42640.1 | F-box protein 9 (FBX09)                                                             |
| GLYMA12G20180.1 | PHD FINGER TRANSCRIPTION FACTOR                                                     |
| GLYMA16G30140.1 | CGI-141-RELATED/LIPASE CONTAINING PROTEIN // SUBFAMILY NOT NAMED                    |
| GLYMA16G04700.1 | THIOREDOXIN-LIKE 1-1, CHLOROPLASTIC-RELATED                                         |
| GLYMA13G34740.1 | PHD FINGER TRANSCRIPTION FACTOR                                                     |
| GLYMA06G01180.1 | FINGER AND BAH MOTIF CONTAINING PUTATIVE TRANSCRIPTION FACTOR-RELATED               |
| GLYMA06G34850.3 | PHD FINGER TRANSCRIPTION FACTOR                                                     |
| GLYMA04G01140.1 | FINGER AND BAH MOTIF CONTAINING PUTATIVE TRANSCRIPTION FACTOR-RELATED               |



**Table S5.** Primers for qPCR of GmCAMTA family plus internal references.

| #  | Gene             | Primer  | Primer Sequence (5' - 3') | bp | Product size (bp) |
|----|------------------|---------|---------------------------|----|-------------------|
| 1` | <i>GmCAMTA1</i>  | Forward | GCTACGTCCGGCTGAAATC       | 19 | 228               |
|    |                  | Reverse | TAGCAATGCAACACATCCACG     | 21 |                   |
| 2  | <i>GmCAMTA2</i>  | Forward | CTCGGTAATTATAAGAAGTTTCG   | 23 | 169               |
|    |                  | Reverse | TTAGTCTCTCATGAGCTTCTCTC   | 23 |                   |
| 3  | <i>GmCAMTA3</i>  | Forward | TTCTTACGGATTGCGTCGTC      | 20 | 197               |
|    |                  | Reverse | CCTTTCTAAAGTATCTCAAACC    | 23 |                   |
| 4  | <i>GmCAMTA4</i>  | Forward | CAGAGATGGATATATCACAACAG   | 23 | 179               |
|    |                  | Reverse | AGCCCAATCATAACCAAGAG      | 20 |                   |
| 5  | <i>GmCAMTA5</i>  | Forward | GAAATTATGGTAGTGTGCCTTCT   | 23 | 226               |
|    |                  | Reverse | TGCCCATGATCACCTGAAAAC     | 21 |                   |
| 6  | <i>GmCAMTA6</i>  | Forward | TCAATTAAGGATGAAGTGACTAC   | 23 | 141               |
|    |                  | Reverse | TACATTTGGCCCTTACCAC       | 20 |                   |
| 7  | <i>GmCAMTA7</i>  | Forward | CTGAAATATGTGAGATACTTCGC   | 23 | 216               |
|    |                  | Reverse | AACAATGCAAGACATCCACACTA   | 23 |                   |
| 8  | <i>GmCAMTA8</i>  | Forward | ATGACCTAGTGGTTCCAAATGT    | 22 | 202               |
|    |                  | Reverse | CTATCTGGGAAACTGTAAGGG     | 21 |                   |
| 9  | <i>GmCAMTA9</i>  | Forward | TCACTGAGGTGTCCCCTGT       | 19 | 220               |
|    |                  | Reverse | CCATCAAAGCTCAAATAGAGAG    | 22 |                   |
| 10 | <i>GmCAMTA10</i> | Forward | GAAAGGCTGAAGGTTGGA        | 18 | 204               |
|    |                  | Reverse | TACACAGAAGAGGAAGTTGG      | 20 |                   |
| 11 | <i>GmCAMTA11</i> | Forward | TGTTTTATAAGCAAGATAACTCTG  | 24 | 180               |
|    |                  | Reverse | GCTTACACGATTCCAGCA        | 18 |                   |
| 12 | <i>GmCAMTA12</i> | Forward | ATGCAAATGATCATAACACAA     | 21 | 160               |
|    |                  | Reverse | GTCTCACTCAGCCTATTGCT      | 20 |                   |
| 13 | <i>GmCAMTA13</i> | Forward | ATGAACCATATTCGTCTCTGG     | 21 | 266               |
|    |                  | Reverse | ATTCACAAATCCTGGAGAGTG     | 21 |                   |
| 14 | <i>GmCAMTA14</i> | Forward | TGAGTTTGAATGATGATGGC      | 20 | 247               |
|    |                  | Reverse | TTACACGATTCCAGCACTTTC     | 21 |                   |
| 15 | <i>GmCAMTA15</i> | Forward | CTAATCAGAGTTTCTCCAGTCCT   | 23 | 305               |
|    |                  | Reverse | CCCTTGATCATCGGGTCT        | 18 |                   |
| 16 | <i>GmActin11</i> | Forward | ACCGGAATGGTTAAGGCTGG      | 20 | 139               |
|    |                  | Reverse | ACTGAGCCTCATACCAACG       | 20 |                   |
| 17 | <i>GmEF1</i>     | Forward | TGCCGCCAAGAAGAAGTGAT      | 20 | 160               |
|    |                  | Reverse | ACATGAAATCGGCGGACACT      | 20 |                   |

**Table S6.** Primers for the qPCR of the GmCAMTA12 orthologue's regulatory network and internal reference in Arabidopsis.

| #  | Gene/Protein                                      | Primer  | Primer Sequence (5' - 3') | bp | Product size (bp) |
|----|---------------------------------------------------|---------|---------------------------|----|-------------------|
| 1  | At3G62140<br>(NIP30)                              | Forward | CGAACCAAAGGAAGCAGCAC      | 20 | 131               |
|    |                                                   | Reverse | TAGCCTTCTTGGGTTGTGGC      | 20 |                   |
| 2  | At1G30650<br>(WRKY14)                             | Forward | CGTCGTACGAGGAATCGGAG      | 20 | 185               |
|    |                                                   | Reverse | AGCCGGAGTTTGTGATGGAG      | 20 |                   |
| 3  | At1G53720<br>(CYP59)                              | Forward | CAAAGGGCAAAGGGAATGGG      | 21 | 132               |
|    |                                                   | Reverse | ATAGCCTTCACCTCCTCCGT      | 20 |                   |
| 4  | At1G68090<br>(ANN5)                               | Forward | TTCCTGACCGAAGCAGGAC       | 20 | 180               |
|    |                                                   | Reverse | TTTCCTCAATGCCTTTGCGA      | 20 |                   |
| 5  | At4G11640<br>(SR)                                 | Forward | AGATTTAACCTGGCCGGTGG      | 20 | 134               |
|    |                                                   | Reverse | GGCCAATAGCTCCACTTGGT      | 20 |                   |
| 6  | At5G50320<br>(ELO3)                               | Forward | GGTTCGAACAGCTTCAGGGA      | 20 | 168               |
|    |                                                   | Reverse | TGCCTAGGACAGCTACACCT      | 20 |                   |
| 7  | At3G49050<br>(CaMHSP)                             | Forward | TGCCTAGGACAGCTACACCT      | 20 | 153               |
|    |                                                   | Reverse | GATACATGCGACCAGGAGCA      | 20 |                   |
| 8  | At4G21390<br>(B120)                               | Forward | CAGCTTCGGTGTCTTGTTC       | 20 | 101               |
|    |                                                   | Reverse | ACAAATACCAAGCATAACCAATGA  | 24 |                   |
| 9  | At2G43110<br>(DEAD BOX<br>Containing<br>Helicase) | Forward | ACCGGGAAACCCATCTGTTC      | 20 | 146               |
|    |                                                   | Reverse | ACAGAGATACCTGTTCTCAACC    | 20 |                   |
| 10 | At3G19850                                         | Forward | CAGGTGGGTCAGATGGGTTC      | 20 | 198               |
|    |                                                   | Reverse | CGATGTCGTTCCAGGACCAG      | 20 |                   |
| 11 | At3G12110<br>(AtActin1)                           | Forward | ACCGGAATGGTTAAGGCTGG      | 20 | 139               |
|    |                                                   | Reverse | ACTGAGCCTCATCACCAACG      | 20 |                   |

**Table S7.** Primers for the qPCR of GmCAMTA12 regulatory network.

| # | Gene/Protein                           | Primer  | Primer Sequence (5'-3')    | bp | Product size (bp) |
|---|----------------------------------------|---------|----------------------------|----|-------------------|
| 1 | GLYMA19G409<br>10 (NIP30)              | Forward | AGATGCGGAATTTAATGAAAGGTTC  | 25 | 116               |
|   |                                        | Reverse | CCACTTGTCGTTTCATATTCCCT    | 22 |                   |
| 2 | GLYMA12G154<br>30.2: (GmPLA<br>1-IIId) | Forward | GTCGAAAACGGGGTAACG         | 18 | 139               |
|   |                                        | Reverse | TCAAATCGATCACGTTCTTCACG    | 23 |                   |
| 3 | GLYMA18G403<br>60.1 (GmTAC1)           | Forward | TATCCATAGAAAAGATAGGGCGGCA  | 25 | 148               |
|   |                                        | Reverse | ACCAGCACCCAACCGAAACA       | 20 |                   |
| 4 | GLYMA06G181<br>50 (GmECP3)             | Forward | CTTGTTGGTTTGTTCGGCT        | 20 | 198               |
|   |                                        | Reverse | TTCTCTGCAAGCAATGCGCT       | 20 |                   |
| 5 | GLYMA05G379<br>30 (GmSRL)              | Forward | TGTTTACAAAAGGGTGGAGCTT     | 22 | 100               |
|   |                                        | Reverse | TGCTGTGTGTTACAACCCT        | 20 |                   |
| 6 | GLYMA08G016<br>70 (GmSDA)              | Forward | GCTGATGATGCAGCACAATCTAAAGC | 26 | 112               |
|   |                                        | Reverse | CAACAGGCCATGTCAAATCTCCA    | 20 |                   |
| 7 | GLYMA20G32<br>540 (GmASR3)             | Forward | GGTGAAATGGGTGGAGAACTATTG   | 25 | 107               |
|   |                                        | Reverse | GCGAACCTTTTTGTAATCGCG      | 21 |                   |
| 8 | GLYMA17G072<br>00 (GmZFP)              | Forward | TAGGGGGTCACCAAATGCC        | 20 | 149               |
|   |                                        | Reverse | AACCCCAAGAGCACGATGAC       | 20 |                   |
